# Supplementary material for: Combined transcriptomic and metabolomic analysis reveals a role for adenosine triphosphate-binding cassette transporters and cell wall remodeling in response to salt stress in strawberry
Source: Front Plant Sci. 2022 Sep 6;13:996765. doi: 10.3389/fpls.2022.996765 (PMC9486094; doi:10.3389/fpls.2022.996765)
Supplement: Supplementary file 3 [file Data_Sheet_1.xlsx]

## Sheet: Table S1
Table S1. The primers used for qRT-PCR
Gene	Forward	Reverse
FxaC_7g19930	CGCTCTATGGCTGAGGATGG	GGAGGAGGTGAAGGCGAAGG
FxaC_13g04770	GCTCCTCCATTATCCTCGTTGC	GCTCCCGCTTTAGTTCTTTCTTGTA
FxaC_15g04150	TTACAAGAAAGAACTAAAGCGGGAGC	GCATTCACAACAGGACCGTATTCA
FxaC_12g45710	AAGAGCCTGGTTGTAGTTGGA	TTCATCCTTTCTGATAGGGTTT
FxaC_25g13880	TGGGTTCAAGTGTCTATCTGC	CTGTCAAGGATGTCGCTGTG
FxaC_14g04190	AACGCTCTAAGAAGGAACCCACA	AGAGGCACCAGTCCACCACATA
FxaC_22g16710	ATGGCTGCTTCAACAATGGCTCTG	CCTTGGACTTGGCTGCGGTTTT
FxaC_18g42540	CCGCCAAGACAGGTTGATGC	CAAGGAAGTGAAGGTAGCCAGT
FxaC_1g03390	GGGTTGAAAGGATTTGAAGTTATTG	CGATGCCTGAGACGACGAAG
FxaC_8g15750	AACACCGATAGCACCAACTCC	CAAAGGGCAGCCTCTGTATC
FxaC_7g13900	TTGGCTGAGCAACCGCATCT	CAAACTTGGAAGATTCGGGAGC
FxaC_24g18350	GCTGCTGTTTCTGATGGTTGTT	GGTAATGGCGACTTCAGGCT

## Sheet: Table S2
Table S2. Summary of the sequencing data generated for RNA-Seq on the strawberry genome.
Sample	Raw reads	Clean reads	Error rate(%)	Q20(%)	Q30(%)	GC content(%)
B_CK_1	58298764	57714166	0.0244	98.3	94.71	46.9
B_CK_2	45252500	44830618	0.0242	98.39	94.97	47.17
B_CK_3	48224614	47781730	0.0242	98.36	94.89	47.11
B_NaCl_1	43274940	42764202	0.0246	98.18	94.5	46.14
B_NaCl_2	46656444	46260448	0.0242	98.36	94.89	46.93
B_NaCl_3	43251492	42864106	0.0245	98.23	94.57	46.69
SC_CK_1	51651978	51315648	0.0243	98.34	94.82	47.28
SC_CK_2	54092462	53719494	0.0242	98.38	94.91	46.67
SC_CK_3	56261646	55835694	0.0241	98.43	95.04	47.21
SC_NaCl_1	41666388	41307686	0.0242	98.38	94.93	47.62
SC_NaCl_2	47124240	46742312	0.0244	98.31	94.74	46.86
SC_NaCl_3	52575514	52128830	0.0243	98.35	94.85	46.71

## Sheet: Table S3
Table S3. Differentially expressed genes under salt stress in 'Benihoppe'
Gene_id	Gene name	Gene description	FC(B_NaCl/B_CK)	Log2FC(B_NaCl/B_CK)	Pvalue	Padjust	Significant	Regulate
FxaC_2g14590	FxaC_2g14590	PREDICTED: pectinesterase [Fragaria vesca subsp. vesca]	13.567	3.76207	6.20481e-94	3.55133e-89	yes	up
FxaC_23g20290	FxaC_23g20290	PREDICTED: nuclear transcription factor Y subunit A-10-like [Fragaria vesca subsp. vesca]	4.906	2.29458	1.34653e-69	3.85342e-65	yes	up
FxaC_23g00940	FxaC_23g00940	PREDICTED: glucan endo-1,3-beta-glucosidase, basic isoform-like [Fragaria vesca subsp. vesca]	7.731	2.95071	5.23289e-69	9.98348e-65	yes	up
FxaC_9g26710	FxaC_9g26710	PREDICTED: ankyrin repeat-containing protein At5g02620-like [Fragaria vesca subsp. vesca]	5.763	2.52679	1.4031e-60	2.00766e-56	yes	up
FxaC_11g47520	FxaC_11g47520	PREDICTED: arabinogalactan peptide 13-like [Fragaria vesca subsp. vesca]	0.22	-2.18702	1.45464e-57	1.66513e-53	yes	down
FxaC_16g03160	FxaC_16g03160	PREDICTED: probable inorganic phosphate transporter 1-3 [Fragaria vesca subsp. vesca]	4.424	2.14551	5.14373e-56	4.90669e-52	yes	up
FxaC_17g22970	FxaC_17g22970	PREDICTED: uncharacterized protein LOC101314284 [Fragaria vesca subsp. vesca]	0.237	-2.07611	2.78796e-52	2.27955e-48	yes	down
FxaC_10g40720	FxaC_10g40720	PREDICTED: metallothionein-like protein 1 [Fragaria vesca subsp. vesca]	0.085	-3.56198	1.02549e-49	7.33673e-46	yes	down
FxaC_13g00970	FxaC_13g00970	PREDICTED: cyclic nucleotide-gated ion channel 1-like [Fragaria vesca subsp. vesca]	17.532	4.13191	1.55286e-49	9.87534e-46	yes	up
FxaC_6g40300	FxaC_6g40300	Acyl transferase/acyl hydrolase/lysophospholipase [Cynara cardunculus var. scolymus]	4.734	2.24316	8.05492e-49	4.61023e-45	yes	up
FxaC_1g11050	FxaC_1g11050	PREDICTED: uncharacterized transporter YBR287W isoform X2 [Fragaria vesca subsp. vesca]	0.23	-2.11948	1.69629e-46	8.82613e-43	yes	down
FxaC_18g19150	FxaC_18g19150	PREDICTED: pectin acetylesterase 8-like [Fragaria vesca subsp. vesca]	0.255	-1.9742	2.40191e-46	1.14561e-42	yes	down
FxaC_28g11910	FxaC_28g11910	PREDICTED: expansin-A4-like [Fragaria vesca subsp. vesca]	6.002	2.58533	6.88923e-46	3.03311e-42	yes	up
FxaC_22g03460	FxaC_22g03460	PREDICTED: probable galactinol--sucrose galactosyltransferase 5 [Fragaria vesca subsp. vesca]	4.842	2.27558	1.98063e-45	8.09723e-42	yes	up
FxaC_21g18830	FxaC_21g18830	PREDICTED: uncharacterized oxidoreductase At1g06690, chloroplastic [Fragaria vesca subsp. vesca]	0.182	-2.45963	4.96727e-45	1.89534e-41	yes	down
FxaC_2g15320	FxaC_2g15320	PREDICTED: uncharacterized transporter YBR287W isoform X2 [Fragaria vesca subsp. vesca]	0.233	-2.10201	9.1545e-44	3.27473e-40	yes	down
FxaC_15g04470	FxaC_15g04470	hypothetical protein CUMW_137170 [Citrus unshiu]	0.112	-3.16324	2.79265e-41	9.40219e-38	yes	down
FxaC_18g16110	FxaC_18g16110	PREDICTED: probable leucine-rich repeat receptor-like protein kinase At5g49770 [Fragaria vesca subsp. vesca]	5.395	2.43164	1.01744e-40	3.23517e-37	yes	up
FxaC_25g26510	FxaC_25g26510	PREDICTED: receptor-like protein 12 [Fragaria vesca subsp. vesca]	13.72	3.77819	3.31372e-40	9.98215e-37	yes	up
FxaC_25g46430	FxaC_25g46430	PREDICTED: probable non-specific lipid-transfer protein AKCS9 [Fragaria vesca subsp. vesca]	6.729	2.75045	6.83709e-40	1.9566e-36	yes	up
FxaC_4g29800	FxaC_4g29800	PREDICTED: uncharacterized transporter YBR287W isoform X2 [Fragaria vesca subsp. vesca]	0.234	-2.09305	2.67245e-39	7.01141e-36	yes	down
FxaC_2g16020	FxaC_2g16020	PREDICTED: lysine histidine transporter-like 8 [Fragaria vesca subsp. vesca]	4.39	2.13408	2.69505e-39	7.01141e-36	yes	up
FxaC_12g00690	FxaC_12g00690	-	0.232	-2.11091	6.65664e-39	1.65649e-35	yes	down
FxaC_17g19770	FxaC_17g19770	PREDICTED: gibberellin-regulated protein 6 [Fragaria vesca subsp. vesca]	0.083	-3.59149	9.92529e-39	2.36697e-35	yes	down
FxaC_24g15130	FxaC_24g15130	PREDICTED: ferritin-3, chloroplastic [Fragaria vesca subsp. vesca]	25.592	4.67765	1.53e-38	3.50278e-35	yes	up
FxaC_12g30660	FxaC_12g30660	PREDICTED: uncharacterized protein LOC101306310 [Fragaria vesca subsp. vesca]	0.1	-3.32191	9.63464e-38	2.12092e-34	yes	down
FxaC_24g26580	FxaC_24g26580	PREDICTED: nuclear transcription factor Y subunit A-10-like [Fragaria vesca subsp. vesca]	10.856	3.4404	1.28226e-37	2.71815e-34	yes	up
FxaC_13g23940	FxaC_13g23940	PREDICTED: PI-PLC X-box domain-containing protein DDB_G0293730-like [Fragaria vesca subsp. vesca]	0.224	-2.15938	1.59004e-37	3.25022e-34	yes	down
FxaC_9g14000	FxaC_9g14000	PREDICTED: transcription factor MYB59 [Fragaria vesca subsp. vesca]	7.097	2.8272	1.81228e-36	3.57676e-33	yes	up
FxaC_13g10950	FxaC_13g10950	PREDICTED: leucoanthocyanidin reductase-like [Fragaria vesca subsp. vesca]	2.756	1.46265	4.48682e-36	8.56011e-33	yes	up
FxaC_17g15360	FxaC_17g15360	PREDICTED: cytochrome P450 78A9-like [Fragaria vesca subsp. vesca]	6.398	2.67757	8.53311e-36	1.57546e-32	yes	up
FxaC_11g13420	FxaC_11g13420	PREDICTED: zingipain-2-like [Fragaria vesca subsp. vesca]	5.29	2.40339	4.45e-34	7.95924e-31	yes	up
FxaC_21g43310	FxaC_21g43310	PREDICTED: nuclear transcription factor Y subunit A-10-like [Fragaria vesca subsp. vesca]	4.786	2.25887	5.53121e-34	9.59331e-31	yes	up
FxaC_11g37420	FxaC_11g37420	PREDICTED: metallothionein-like protein 1 [Fragaria vesca subsp. vesca]	0.108	-3.20956	5.71008e-34	9.61225e-31	yes	down
FxaC_7g24820	FxaC_7g24820	Glutaredoxin [Cynara cardunculus var. scolymus]	3.23	1.69165	8.63681e-34	1.41237e-30	yes	up
FxaC_11g03590	FxaC_11g03590	PREDICTED: uncharacterized protein LOC101293074 [Fragaria vesca subsp. vesca]	0.222	-2.16975	1.25936e-33	1.98424e-30	yes	down
FxaC_28g09200	FxaC_28g09200	PREDICTED: ferritin-4, chloroplastic [Fragaria vesca subsp. vesca]	6.017	2.58903	1.28273e-33	1.98424e-30	yes	up
FxaC_13g05210	FxaC_13g05210	hypothetical protein CUMW_137170 [Citrus unshiu]	0.22	-2.18443	3.93152e-33	5.9216e-30	yes	down
FxaC_14g23580	FxaC_14g23580	PREDICTED: uncharacterized protein LOC101310110 [Fragaria vesca subsp. vesca]	7.806	2.96458	2.4491e-32	3.59421e-29	yes	up
FxaC_22g41640	FxaC_22g41640	PREDICTED: nuclear transcription factor Y subunit A-10-like [Fragaria vesca subsp. vesca]	12.513	3.64538	4.00262e-32	5.72725e-29	yes	up
FxaC_13g38020	FxaC_13g38020	putative START-like domain, Bet v I type allergen [Rosa chinensis]	3.041	1.6046	8.95492e-32	1.25009e-28	yes	up
FxaC_6g39180	FxaC_6g39180	PREDICTED: peamaclein [Fragaria vesca subsp. vesca]	0.166	-2.58675	1.30509e-31	1.7785e-28	yes	down
FxaC_19g04600	FxaC_19g04600	cyclic nucleotide-gated ion channel 1-like [Rosa chinensis]	7.777	2.9592	1.44658e-31	1.92547e-28	yes	up
FxaC_21g65570	FxaC_21g65570	PREDICTED: uncharacterized protein LOC101304116 [Fragaria vesca subsp. vesca]	5.927	2.56724	1.62435e-31	2.11294e-28	yes	up
FxaC_21g20450	FxaC_21g20450	PREDICTED: protein trichome birefringence-like 43 [Fragaria vesca subsp. vesca]	0.317	-1.65791	2.18999e-31	2.75677e-28	yes	down
FxaC_9g35070	FxaC_9g35070	PREDICTED: uncharacterized protein LOC101306310 [Fragaria vesca subsp. vesca]	0.149	-2.74627	2.21562e-31	2.75677e-28	yes	down
FxaC_22g09900	FxaC_22g09900	uncharacterized protein LOC112188756 isoform X2 [Rosa chinensis]	0.231	-2.11241	2.75584e-31	3.35597e-28	yes	down
FxaC_3g09810	FxaC_3g09810	PREDICTED: pectinesterase [Fragaria vesca subsp. vesca]	26.169	4.70977	2.93184e-31	3.49591e-28	yes	up
FxaC_21g49120	FxaC_21g49120	PREDICTED: UDP-glycosyltransferase 86A1-like [Fragaria vesca subsp. vesca]	3.501	1.80774	8.3309e-31	9.731e-28	yes	up
FxaC_15g37350	FxaC_15g37350	PREDICTED: probable inorganic phosphate transporter 1-3 [Fragaria vesca subsp. vesca]	3.423	1.77523	9.2056e-31	1.05376e-27	yes	up
FxaC_28g00440	FxaC_28g00440	PREDICTED: LOW QUALITY PROTEIN: 4-coumarate--CoA ligase 2-like [Fragaria vesca subsp. vesca]	3.231	1.692	9.47144e-31	1.06294e-27	yes	up
FxaC_17g09230	FxaC_17g09230	PREDICTED: BTB/POZ and TAZ domain-containing protein 1 isoform X1 [Fragaria vesca subsp. vesca]	4.076	2.02725	1.95654e-30	2.15351e-27	yes	up
FxaC_7g37140	FxaC_7g37140	PREDICTED: auxin-responsive protein IAA2-like [Fragaria vesca subsp. vesca]	2.957	1.56423	2.74144e-30	2.96049e-27	yes	up
FxaC_8g06290	FxaC_8g06290	dihydroflavonol 4-reductase [Fragaria x ananassa]	13.706	3.77672	4.31237e-30	4.5364e-27	yes	up
FxaC_16g01310	FxaC_16g01310	PREDICTED: beta-amyrin 28-oxidase-like [Fragaria vesca subsp. vesca]	4.096	2.03407	4.35926e-30	4.5364e-27	yes	up
FxaC_3g22610	FxaC_3g22610	PREDICTED: dnaJ homolog subfamily C member 2 [Fragaria vesca subsp. vesca]	0.274	-1.86647	7.15147e-30	7.30918e-27	yes	down
FxaC_12g34930	FxaC_12g34930	probable LRR receptor-like serine/threonine-protein kinase At1g56140 isoform X2 [Rosa chinensis]	3.764	1.91225	1.90776e-29	1.91562e-26	yes	up
FxaC_1g02890	FxaC_1g02890	PREDICTED: zinc finger Ran-binding domain-containing protein 2 [Fragaria vesca subsp. vesca]	0.043	-4.55279	2.78131e-29	2.74463e-26	yes	down
FxaC_22g60360	FxaC_22g60360	PREDICTED: pleiotropic drug resistance protein 3-like isoform X2 [Fragaria vesca subsp. vesca]	0.349	-1.51928	4.31704e-29	4.18789e-26	yes	down
FxaC_12g11080	FxaC_12g11080	PREDICTED: transcription factor MYB59 [Fragaria vesca subsp. vesca]	24.729	4.62816	5.05394e-29	4.82104e-26	yes	up
FxaC_24g43190	FxaC_24g43190	PREDICTED: auxin-binding protein ABP19a [Fragaria vesca subsp. vesca]	0.284	-1.81499	5.84628e-29	5.48544e-26	yes	down
FxaC_25g41140	FxaC_25g41140	PREDICTED: expansin-A4-like [Fragaria vesca subsp. vesca]	6.973	2.8017	8.76036e-29	8.08708e-26	yes	up
FxaC_5g01090	FxaC_5g01090	PREDICTED: peamaclein [Fragaria vesca subsp. vesca]	0.21	-2.25455	8.90689e-29	8.09184e-26	yes	down
FxaC_9g37020	FxaC_9g37020	PREDICTED: probable leucine-rich repeat receptor-like serine/threonine-protein kinase At3g14840 [Fragaria vesca subsp. vesca]	3.273	1.71051	1.28333e-28	1.14768e-25	yes	up
FxaC_20g14690	FxaC_20g14690	flavonoid 3'-hydroxylase [Fragaria x ananassa]	2.618	1.38861	1.39636e-28	1.22955e-25	yes	up
FxaC_8g29300	FxaC_8g29300	PREDICTED: GATA transcription factor 5-like [Fragaria vesca subsp. vesca]	3.665	1.87364	1.62311e-28	1.40756e-25	yes	up
FxaC_2g19620	FxaC_2g19620	PREDICTED: calcium uniporter protein 2, mitochondrial [Fragaria vesca subsp. vesca]	0.143	-2.80924	1.87882e-28	1.60499e-25	yes	down
FxaC_9g48120	FxaC_9g48120	PREDICTED: GDSL esterase/lipase At1g29660-like [Fragaria vesca subsp. vesca]	0.123	-3.0175	2.34377e-28	1.97273e-25	yes	down
FxaC_10g39410	FxaC_10g39410	PREDICTED: transcription factor MYB59 [Fragaria vesca subsp. vesca]	4.837	2.274	3.3446e-28	2.76994e-25	yes	up
FxaC_9g26720	FxaC_9g26720	PREDICTED: ankyrin repeat-containing protein At5g02620-like isoform X1 [Fragaria vesca subsp. vesca]	6.646	2.73242	3.38771e-28	2.76994e-25	yes	up
FxaC_27g24230	FxaC_27g24230	hypothetical protein PRUPE_7G210900 [Prunus persica]	3.008	1.58894	4.25752e-28	3.4321e-25	yes	up
FxaC_24g46040	FxaC_24g46040	glucan endo-1,3-beta-glucosidase, basic isoform-like [Rosa chinensis]	4.068	2.02419	6.18083e-28	4.91333e-25	yes	up
FxaC_5g36660	FxaC_5g36660	hypothetical protein CCACVL1_14000 [Corchorus capsularis]	3.145	1.65319	9.57468e-28	7.50694e-25	yes	up
FxaC_25g57830	FxaC_25g57830	PREDICTED: CDGSH iron-sulfur domain-containing protein NEET [Fragaria vesca subsp. vesca]	3.469	1.79447	4.67899e-27	3.61894e-24	yes	up
FxaC_27g18810	FxaC_27g18810	PREDICTED: receptor-like protein kinase 2 [Fragaria vesca subsp. vesca]	6.876	2.78148	6.52027e-27	4.97583e-24	yes	up
FxaC_19g35790	FxaC_19g35790	PREDICTED: protein ECERIFERUM 1-like [Fragaria vesca subsp. vesca]	0.212	-2.23871	7.03021e-27	5.29439e-24	yes	down
FxaC_22g10240	FxaC_22g10240	PREDICTED: lipoyl synthase 2, mitochondrial [Fragaria vesca subsp. vesca]	0.244	-2.03398	8.08796e-27	6.01187e-24	yes	down
FxaC_17g01530	FxaC_17g01530	anthocyanidin synthase [Fragaria x ananassa]	2.265	1.17951	9.31678e-27	6.83648e-24	yes	up
FxaC_19g13000	FxaC_19g13000	hypothetical protein glysoja_034865 [Glycine soja]	0.164	-2.60876	1.62822e-26	1.17964e-23	yes	down
FxaC_9g36200	FxaC_9g36200	PREDICTED: TPR repeat-containing thioredoxin TTL1 [Fragaria vesca subsp. vesca]	0.299	-1.74335	2.17043e-26	1.55281e-23	yes	down
FxaC_25g08980	FxaC_25g08980	PREDICTED: receptor-like protein 12 [Fragaria vesca subsp. vesca]	9.397	3.23224	2.52058e-26	1.78105e-23	yes	up
FxaC_23g61070	FxaC_23g61070	PREDICTED: uncharacterized oxidoreductase At1g06690, chloroplastic [Fragaria vesca subsp. vesca]	0.241	-2.05336	2.59668e-26	1.81245e-23	yes	down
FxaC_17g10040	FxaC_17g10040	PREDICTED: LRR receptor-like serine/threonine-protein kinase EFR [Fragaria vesca subsp. vesca]	11.15	3.47899	4.82772e-26	3.32909e-23	yes	up
FxaC_13g07780	FxaC_13g07780	BnaC09g52490D [Brassica napus]	5.281	2.4009	5.58874e-26	3.80799e-23	yes	up
FxaC_4g30400	FxaC_4g30400	PREDICTED: pectinesterase [Fragaria vesca subsp. vesca]	20.504	4.35783	8.2226e-26	5.53671e-23	yes	up
FxaC_27g32580	FxaC_27g32580	PREDICTED: expansin-A4-like [Fragaria vesca subsp. vesca]	7.128	2.83359	1.50715e-25	1.00304e-22	yes	up
FxaC_27g23290	FxaC_27g23290	PREDICTED: probable leucine-rich repeat receptor-like protein kinase At1g35710, partial [Fragaria vesca subsp. vesca]	6.011	2.58756	1.88227e-25	1.2383e-22	yes	up
FxaC_3g11340	FxaC_3g11340	PREDICTED: uncharacterized transporter YBR287W isoform X1 [Fragaria vesca subsp. vesca]	0.348	-1.52365	2.70823e-25	1.76142e-22	yes	down
FxaC_11g13470	FxaC_11g13470	PREDICTED: zingipain-2-like [Fragaria vesca subsp. vesca]	5.654	2.49932	3.11841e-25	2.00542e-22	yes	up
FxaC_11g04170	FxaC_11g04170	PREDICTED: GDSL esterase/lipase At1g29670-like [Fragaria vesca subsp. vesca]	0.117	-3.09969	3.17478e-25	2.01898e-22	yes	down
FxaC_13g04420	FxaC_13g04420	PREDICTED: probable xyloglucan endotransglucosylase/hydrolase protein 33 [Fragaria vesca subsp. vesca]	0.204	-2.29554	4.5683e-25	2.87326e-22	yes	down
FxaC_17g45590	FxaC_17g45590	PREDICTED: serine/threonine-protein kinase-like protein CCR4 [Fragaria vesca subsp. vesca]	7.423	2.892	6.06968e-25	3.77606e-22	yes	up
FxaC_14g04770	FxaC_14g04770	hypothetical protein CUMW_137170 [Citrus unshiu]	0.154	-2.69522	6.39021e-25	3.93273e-22	yes	down
FxaC_4g22520	FxaC_4g22520	PREDICTED: dehydrin Xero 2 [Fragaria vesca subsp. vesca]	3.41	1.76991	7.55447e-25	4.59979e-22	yes	up
FxaC_9g22200	FxaC_9g22200	O-acyltransferase WSD1-like [Rosa chinensis]	0.329	-1.60459	1.09357e-24	6.58846e-22	yes	down
FxaC_7g37120	FxaC_7g37120	PREDICTED: receptor-like protein kinase 5 [Fragaria vesca subsp. vesca]	4.674	2.22456	1.11985e-24	6.6765e-22	yes	up
FxaC_14g09250	FxaC_14g09250	leucoanthocyanidin reductase [Fragaria x ananassa]	3.888	1.95891	1.24592e-24	7.35158e-22	yes	up
FxaC_21g56340	FxaC_21g56340	PREDICTED: lactosylceramide 4-alpha-galactosyltransferase-like [Fragaria vesca subsp. vesca]	0.227	-2.13886	1.71147e-24	9.9955e-22	yes	down
FxaC_26g02910	FxaC_26g02910	PREDICTED: LOW QUALITY PROTEIN: 4-coumarate--CoA ligase 2-like [Fragaria vesca subsp. vesca]	2.708	1.43697	3.55287e-24	2.05402e-21	yes	up
FxaC_18g45220	FxaC_18g45220	anthocyanidin synthase [Fragaria x ananassa]	2.682	1.42313	3.69476e-24	2.11469e-21	yes	up
FxaC_18g12000	FxaC_18g12000	PREDICTED: beta-xylosidase/alpha-L-arabinofuranosidase 2-like isoform X1 [Fragaria vesca subsp. vesca]	0.332	-1.59012	4.32556e-24	2.45122e-21	yes	down
FxaC_26g12640	FxaC_26g12640	PREDICTED: ferritin-4, chloroplastic [Fragaria vesca subsp. vesca]	2.688	1.4268	5.02984e-24	2.82238e-21	yes	up
FxaC_25g45820	FxaC_25g45820	PREDICTED: uncharacterized protein LOC101305600 [Fragaria vesca subsp. vesca]	0.337	-1.56723	7.03889e-24	3.91137e-21	yes	down
FxaC_3g11920	FxaC_3g11920	PREDICTED: lysine histidine transporter-like 8 [Fragaria vesca subsp. vesca]	3.344	1.74163	9.37208e-24	5.1578e-21	yes	up
FxaC_6g12750	FxaC_6g12750	PREDICTED: glutamate receptor 2.7-like [Fragaria vesca subsp. vesca]	7.82	2.96719	1.07911e-23	5.86813e-21	yes	up
FxaC_10g17670	FxaC_10g17670	PREDICTED: probable glutathione S-transferase [Fragaria vesca subsp. vesca]	0.301	-1.73105	1.08679e-23	5.86813e-21	yes	down
FxaC_8g11480	FxaC_8g11480	Acyl transferase/acyl hydrolase/lysophospholipase [Cynara cardunculus var. scolymus]	2.955	1.56302	1.26175e-23	6.74916e-21	yes	up
FxaC_9g28650	FxaC_9g28650	PREDICTED: glycine-rich cell wall structural protein-like [Fragaria vesca subsp. vesca]	0.121	-3.04644	1.34095e-23	7.04135e-21	yes	down
FxaC_3g08300	FxaC_3g08300	PREDICTED: nuclear transcription factor Y subunit A-3-like isoform X1 [Fragaria vesca subsp. vesca]	3.233	1.69278	1.34098e-23	7.04135e-21	yes	up
FxaC_11g21920	FxaC_11g21920	PREDICTED: uncharacterized protein LOC101301849 [Fragaria vesca subsp. vesca]	0.355	-1.49309	1.46381e-23	7.61645e-21	yes	down
FxaC_13g05160	FxaC_13g05160	PREDICTED: probable xyloglucan endotransglucosylase/hydrolase protein 28 [Fragaria vesca subsp. vesca]	0.253	-1.98128	1.742e-23	8.98231e-21	yes	down
FxaC_7g35090	FxaC_7g35090	PREDICTED: peamaclein [Fragaria vesca subsp. vesca]	0.184	-2.44273	2.63663e-23	1.34739e-20	yes	down
FxaC_25g44770	FxaC_25g44770	PREDICTED: ferritin-4, chloroplastic [Fragaria vesca subsp. vesca]	3.603	1.84938	2.86172e-23	1.44947e-20	yes	up
FxaC_23g06160	FxaC_23g06160	probable LRR receptor-like serine/threonine-protein kinase At1g51880 [Rosa chinensis]	6.333	2.66291	4.47399e-23	2.24622e-20	yes	up
FxaC_2g22840	FxaC_2g22840	PREDICTED: metal transporter Nramp3 [Fragaria vesca subsp. vesca]	0.287	-1.79882	5.60879e-23	2.79147e-20	yes	down
FxaC_18g30990	FxaC_18g30990	PREDICTED: chlorophyll a-b binding protein P4, chloroplastic [Fragaria vesca subsp. vesca]	0.416	-1.26382	5.84931e-23	2.88608e-20	yes	down
FxaC_26g22870	FxaC_26g22870	PREDICTED: probable serine/threonine-protein kinase At1g01540 [Fragaria vesca subsp. vesca]	0.369	-1.4397	6.40362e-23	3.13257e-20	yes	down
FxaC_25g31250	FxaC_25g31250	receptor like protein 30-like [Prunus avium]	5.22	2.38403	7.34345e-23	3.56189e-20	yes	up
FxaC_8g22510	FxaC_8g22510	PREDICTED: expansin-like A2 [Fragaria vesca subsp. vesca]	0.202	-2.30682	8.44158e-23	4.06012e-20	yes	down
FxaC_21g25230	FxaC_21g25230	PREDICTED: auxin-binding protein ABP19a [Fragaria vesca subsp. vesca]	0.33	-1.59993	9.55331e-23	4.55653e-20	yes	down
FxaC_6g06700	FxaC_6g06700	PREDICTED: probable carboxylesterase 5 [Fragaria vesca subsp. vesca]	0.186	-2.42766	1.00644e-22	4.76065e-20	yes	down
FxaC_12g05850	FxaC_12g05850	PREDICTED: trans-cinnamate 4-monooxygenase [Fragaria vesca subsp. vesca]	2.361	1.23932	1.69909e-22	7.97108e-20	yes	up
FxaC_13g20590	FxaC_13g20590	PREDICTED: probable pectate lyase 5 [Fragaria vesca subsp. vesca]	0.299	-1.7407	1.93512e-22	9.0046e-20	yes	down
FxaC_10g21440	FxaC_10g21440	PREDICTED: TPR repeat-containing thioredoxin TTL1 [Fragaria vesca subsp. vesca]	0.237	-2.07764	2.64614e-22	1.22139e-19	yes	down
FxaC_2g18760	FxaC_2g18760	PREDICTED: protein RADIALIS-like 4 [Fragaria vesca subsp. vesca]	2.638	1.39937	2.96438e-22	1.35733e-19	yes	up
FxaC_5g21620	FxaC_5g21620	PREDICTED: NAC transcription factor 29 [Fragaria vesca subsp. vesca]	5.164	2.36847	5.85884e-22	2.66136e-19	yes	up
FxaC_9g36980	FxaC_9g36980	PREDICTED: probable leucine-rich repeat receptor-like serine/threonine-protein kinase At3g14840 [Fragaria vesca subsp. vesca]	3.205	1.68011	6.88861e-22	3.10448e-19	yes	up
FxaC_7g30610	FxaC_7g30610	PREDICTED: uncharacterized protein LOC101313379 [Fragaria vesca subsp. vesca]	4.385	2.13273	9.95324e-22	4.45058e-19	yes	up
FxaC_23g17680	FxaC_23g17680	PREDICTED: transcription factor bHLH130 [Fragaria vesca subsp. vesca]	4.37	2.12778	1.0232e-21	4.53974e-19	yes	up
FxaC_10g18870	FxaC_10g18870	PREDICTED: probable leucine-rich repeat receptor-like serine/threonine-protein kinase At3g14840 [Fragaria vesca subsp. vesca]	3.769	1.91423	1.19516e-21	5.26194e-19	yes	up
FxaC_12g47930	FxaC_12g47930	uncharacterized protein LOC110754814 [Prunus avium]	3.413	1.77111	1.36928e-21	5.98252e-19	yes	up
FxaC_7g14140	FxaC_7g14140	PREDICTED: lysine histidine transporter-like 8 [Fragaria vesca subsp. vesca]	3.711	1.89172	1.54852e-21	6.71436e-19	yes	up
FxaC_8g10870	FxaC_8g10870	PREDICTED: auxin-responsive protein IAA2-like [Fragaria vesca subsp. vesca]	2.945	1.55835	1.58435e-21	6.81808e-19	yes	up
FxaC_21g21750	FxaC_21g21750	PREDICTED: beta-amyrin synthase-like [Fragaria vesca subsp. vesca]	2.458	1.29751	2.09804e-21	8.96128e-19	yes	up
FxaC_14g04710	FxaC_14g04710	PREDICTED: probable xyloglucan endotransglucosylase/hydrolase protein 28 [Fragaria vesca subsp. vesca]	0.283	-1.82244	2.68589e-21	1.13872e-18	yes	down
FxaC_9g46190	FxaC_9g46190	PREDICTED: glutamate receptor 2.7-like [Fragaria vesca subsp. vesca]	6.372	2.67178	3.77138e-21	1.58717e-18	yes	up
FxaC_25g31580	FxaC_25g31580	PREDICTED: putative receptor-like protein kinase At3g47110 isoform X1 [Fragaria vesca subsp. vesca]	7.616	2.92896	4.69239e-21	1.96036e-18	yes	up
FxaC_9g42390	FxaC_9g42390	PREDICTED: vacuolar-sorting receptor 6 [Fragaria vesca subsp. vesca]	4.958	2.30967	5.54591e-21	2.30015e-18	yes	up
FxaC_6g19320	FxaC_6g19320	PREDICTED: lysine histidine transporter-like 8 [Fragaria vesca subsp. vesca]	4.492	2.16749	5.64508e-21	2.32443e-18	yes	up
FxaC_28g14820	FxaC_28g14820	PREDICTED: 3-ketoacyl-CoA synthase 21-like [Fragaria vesca subsp. vesca]	4.903	2.29372	7.64962e-21	3.12733e-18	yes	up
FxaC_19g12860	FxaC_19g12860	PREDICTED: chlorophyll a-b binding protein P4, chloroplastic [Fragaria vesca subsp. vesca]	0.332	-1.59142	7.83968e-21	3.1823e-18	yes	down
FxaC_23g59990	FxaC_23g59990	PREDICTED: putative laccase-9 [Fragaria vesca subsp. vesca]	0.028	-5.15814	8.85477e-21	3.56903e-18	yes	down
FxaC_1g11790	FxaC_1g11790	PREDICTED: lysine histidine transporter-like 8 [Fragaria vesca subsp. vesca]	3.164	1.66163	1.13458e-20	4.54111e-18	yes	up
FxaC_26g16640	FxaC_26g16640	PREDICTED: 3-ketoacyl-CoA synthase 21-like [Fragaria vesca subsp. vesca]	11.562	3.53128	1.1643e-20	4.62767e-18	yes	up
FxaC_12g23830	FxaC_12g23830	PREDICTED: photosystem I subunit O [Fragaria vesca subsp. vesca]	0.496	-1.01082	1.27776e-20	5.01764e-18	yes	down
FxaC_19g07460	FxaC_19g07460	PREDICTED: BTB/POZ and TAZ domain-containing protein 1 isoform X1 [Fragaria vesca subsp. vesca]	3.496	1.80566	1.27994e-20	5.01764e-18	yes	up
FxaC_23g25910	FxaC_23g25910	phenylalanine ammonia-lyase 2 [Fragaria x ananassa]	2.092	1.06501	1.29967e-20	5.06031e-18	yes	up
FxaC_12g12730	FxaC_12g12730	PREDICTED: MLO-like protein 3 [Fragaria vesca subsp. vesca]	2.912	1.54192	1.34251e-20	5.1918e-18	yes	up
FxaC_3g31540	FxaC_3g31540	hypothetical protein RchiOBHm_Chr2g0123801 [Rosa chinensis]	3.7	1.88762	1.63564e-20	6.28292e-18	yes	up
FxaC_27g23850	FxaC_27g23850	receptor-like protein EIX2 [Rosa chinensis]	4.297	2.10316	1.91107e-20	7.29201e-18	yes	up
FxaC_20g04440	FxaC_20g04440	PREDICTED: uncharacterized protein LOC101294764 [Fragaria vesca subsp. vesca]	4.946	2.30637	2.48581e-20	9.4222e-18	yes	up
FxaC_15g39850	FxaC_15g39850	PREDICTED: early light-induced protein 1, chloroplastic-like [Fragaria vesca subsp. vesca]	4.242	2.08473	2.74212e-20	1.03254e-17	yes	up
FxaC_16g27670	FxaC_16g27670	PREDICTED: probable xyloglucan endotransglucosylase/hydrolase protein 28 [Fragaria vesca subsp. vesca]	0.265	-1.91516	3.4551e-20	1.2925e-17	yes	down
FxaC_14g19630	FxaC_14g19630	Major strawberry allergen Fra a 1-E [Fragaria x ananassa]	2.876	1.52396	3.60647e-20	1.34037e-17	yes	up
FxaC_21g27770	FxaC_21g27770	PREDICTED: uncharacterized protein LOC101299670 isoform X1 [Fragaria vesca subsp. vesca]	3.07	1.6183	3.66081e-20	1.35178e-17	yes	up
FxaC_14g27800	FxaC_14g27800	PREDICTED: vacuolar amino acid transporter 1 isoform X2 [Fragaria vesca subsp. vesca]	4.18	2.06367	3.76889e-20	1.38277e-17	yes	up
FxaC_5g20490	FxaC_5g20490	PREDICTED: 3-hydroxy-3-methylglutaryl-coenzyme A reductase 1-like [Fragaria vesca subsp. vesca]	4.628	2.21032	3.90195e-20	1.42247e-17	yes	up
FxaC_25g31540	FxaC_25g31540	PREDICTED: putative receptor-like protein kinase At3g47110 isoform X1 [Fragaria vesca subsp. vesca]	6.146	2.61959	5.20244e-20	1.88457e-17	yes	up
FxaC_23g01730	FxaC_23g01730	PREDICTED: beta-amyrin synthase-like [Fragaria vesca subsp. vesca]	2.911	1.54153	6.16663e-20	2.21979e-17	yes	up
FxaC_17g29320	FxaC_17g29320	PREDICTED: glycine-rich cell wall structural protein 1.8 [Fragaria vesca subsp. vesca]	0.326	-1.61585	7.2263e-20	2.58498e-17	yes	down
FxaC_14g24060	FxaC_14g24060	PREDICTED: sugar transport protein 13 [Fragaria vesca subsp. vesca]	3.063	1.61493	7.40448e-20	2.63227e-17	yes	up
FxaC_4g33810	FxaC_4g33810	PREDICTED: zinc finger CCCH domain-containing protein 20 [Fragaria vesca subsp. vesca]	2.888	1.53021	8.75424e-20	3.0929e-17	yes	up
FxaC_21g38680	FxaC_21g38680	PREDICTED: transcription factor bHLH130 [Fragaria vesca subsp. vesca]	3.727	1.89806	9.2499e-20	3.24796e-17	yes	up
FxaC_12g44020	FxaC_12g44020	PREDICTED: LRR receptor-like serine/threonine-protein kinase FLS2 [Fragaria vesca subsp. vesca]	0.245	-2.03179	1.10201e-19	3.82566e-17	yes	down
FxaC_23g61600	FxaC_23g61600	PREDICTED: uncharacterized protein LOC101310720 [Fragaria vesca subsp. vesca]	0.408	-1.29317	1.10288e-19	3.82566e-17	yes	down
FxaC_28g09250	FxaC_28g09250	PREDICTED: ferritin-4, chloroplastic [Fragaria vesca subsp. vesca]	2.725	1.44628	1.17992e-19	4.06825e-17	yes	up
FxaC_11g42640	FxaC_11g42640	PREDICTED: trans-cinnamate 4-monooxygenase [Fragaria vesca subsp. vesca]	2.176	1.12168	1.28892e-19	4.41743e-17	yes	up
FxaC_1g00930	FxaC_1g00930	PREDICTED: leucine-rich repeat extensin-like protein 4 [Fragaria vesca subsp. vesca]	0.344	-1.53971	1.50974e-19	5.14346e-17	yes	down
FxaC_26g11580	FxaC_26g11580	putative cysteine-rich repeat secretory protein 21 [Rosa chinensis]	0.307	-1.70288	1.66803e-19	5.64911e-17	yes	down
FxaC_15g32250	FxaC_15g32250	PREDICTED: 2-alkenal reductase (NADP(+)-dependent)-like [Fragaria vesca subsp. vesca]	0.375	-1.41497	1.71881e-19	5.78682e-17	yes	down
FxaC_27g23320	FxaC_27g23320	PREDICTED: uncharacterized protein LOC101303550 [Fragaria vesca subsp. vesca]	5.426	2.44	2.08118e-19	6.96586e-17	yes	up
FxaC_9g48700	FxaC_9g48700	PREDICTED: chlorophyll a-b binding protein of LHCII type 1 [Fragaria vesca subsp. vesca]	0.227	-2.14186	2.34295e-19	7.79644e-17	yes	down
FxaC_7g14790	FxaC_7g14790	PREDICTED: protein EXORDIUM-like 5 [Fragaria vesca subsp. vesca]	0.378	-1.40176	2.54424e-19	8.41733e-17	yes	down
FxaC_7g19380	FxaC_7g19380	PREDICTED: photosystem I reaction center subunit IV B, chloroplastic-like [Fragaria vesca subsp. vesca]	0.494	-1.01631	3.00663e-19	9.88991e-17	yes	down
FxaC_10g16380	FxaC_10g16380	probable LRR receptor-like serine/threonine-protein kinase At1g56140 isoform X2 [Rosa chinensis]	2.715	1.44077	3.02996e-19	9.9097e-17	yes	up
FxaC_22g35560	FxaC_22g35560	PREDICTED: transcription factor bHLH130 [Fragaria vesca subsp. vesca]	3.275	1.7114	4.42785e-19	1.43993e-16	yes	up
FxaC_20g24120	FxaC_20g24120	PREDICTED: glycine-rich cell wall structural protein 1.8 [Fragaria vesca subsp. vesca]	0.332	-1.58873	4.61109e-19	1.49105e-16	yes	down
FxaC_6g37730	FxaC_6g37730	PREDICTED: glutamate receptor 2.8-like [Fragaria vesca subsp. vesca]	9.095	3.1851	4.6786e-19	1.50438e-16	yes	up
FxaC_24g17380	FxaC_24g17380	PREDICTED: uncharacterized protein LOC101294772 [Fragaria vesca subsp. vesca]	0.181	-2.46596	5.26014e-19	1.68192e-16	yes	down
FxaC_24g47220	FxaC_24g47220	Chlorophyll a-b binding protein 40, chloroplastic [Trichinella nelsoni]	0.279	-1.84033	5.32017e-19	1.69167e-16	yes	down
FxaC_3g08470	FxaC_3g08470	PREDICTED: replication protein A 70 kDa DNA-binding subunit A [Fragaria vesca subsp. vesca]	0.454	-1.13986	5.36867e-19	1.69766e-16	yes	down
FxaC_10g10360	FxaC_10g10360	PREDICTED: probable ubiquitin-conjugating enzyme E2 24 [Fragaria vesca subsp. vesca]	2.654	1.40829	6.32115e-19	1.98786e-16	yes	up
FxaC_14g05280	FxaC_14g05280	-	3.763	1.9119	6.70652e-19	2.09753e-16	yes	up
FxaC_10g15260	FxaC_10g15260	-	2.384	1.25332	6.8271e-19	2.12364e-16	yes	up
FxaC_21g27910	FxaC_21g27910	PREDICTED: GDSL esterase/lipase APG [Fragaria vesca subsp. vesca]	0.342	-1.54683	6.8948e-19	2.1331e-16	yes	down
FxaC_4g21160	FxaC_4g21160	PREDICTED: casein kinase II subunit alpha [Fragaria vesca subsp. vesca]	0.415	-1.26981	7.02312e-19	2.16112e-16	yes	down
FxaC_15g04430	FxaC_15g04430	PREDICTED: probable xyloglucan endotransglucosylase/hydrolase protein 28 [Fragaria vesca subsp. vesca]	0.294	-1.76713	7.36569e-19	2.25441e-16	yes	down
FxaC_8g06390	FxaC_8g06390	PREDICTED: jasmonate O-methyltransferase-like [Fragaria vesca subsp. vesca]	0.209	-2.26169	8.88274e-19	2.68997e-16	yes	down
FxaC_1g19310	FxaC_1g19310	PREDICTED: metal transporter Nramp3 [Fragaria vesca subsp. vesca]	0.285	-1.80909	8.99256e-19	2.70889e-16	yes	down
FxaC_5g20530	FxaC_5g20530	PREDICTED: senescence-specific cysteine protease SAG39-like [Fragaria vesca subsp. vesca]	6.199	2.63202	9.39832e-19	2.8163e-16	yes	up
FxaC_9g48690	FxaC_9g48690	PREDICTED: chlorophyll a-b binding protein of LHCII type 1-like [Fragaria vesca subsp. vesca]	0.251	-1.99165	1.0202e-18	3.04119e-16	yes	down
FxaC_11g19220	FxaC_11g19220	PREDICTED: uncharacterized protein LOC105350912 [Fragaria vesca subsp. vesca]	3.39	1.76135	1.05058e-18	3.11554e-16	yes	up
FxaC_24g29150	FxaC_24g29150	PREDICTED: transcription factor bHLH130 [Fragaria vesca subsp. vesca]	2.91	1.54102	1.07424e-18	3.16928e-16	yes	up
FxaC_13g48930	FxaC_13g48930	PREDICTED: probable pectate lyase 8 [Fragaria vesca subsp. vesca]	0.315	-1.66772	1.0899e-18	3.19899e-16	yes	down
FxaC_10g11230	FxaC_10g11230	wall-associated receptor kinase 1-like isoform X1 [Prunus avium]	7.921	2.98568	1.0994e-18	3.21042e-16	yes	up
FxaC_2g13090	FxaC_2g13090	PREDICTED: nuclear transcription factor Y subunit A-3-like isoform X1 [Fragaria vesca subsp. vesca]	3.558	1.83088	1.13963e-18	3.311e-16	yes	up
FxaC_7g09980	FxaC_7g09980	PREDICTED: putative laccase-9 [Fragaria vesca subsp. vesca]	2.79	1.48039	1.27106e-18	3.6583e-16	yes	up
FxaC_16g30480	FxaC_16g30480	PREDICTED: probable inactive 2-oxoglutarate-dependent dioxygenase AOP2 [Fragaria vesca subsp. vesca]	3.546	1.82614	1.27195e-18	3.6583e-16	yes	up
FxaC_10g17880	FxaC_10g17880	disease resistance protein RPM1-like [Prunus avium]	4.619	2.20765	1.45118e-18	4.1529e-16	yes	up
FxaC_3g08480	FxaC_3g08480	PREDICTED: uncharacterized protein LOC101312960 [Fragaria vesca subsp. vesca]	0.423	-1.24224	1.50347e-18	4.28116e-16	yes	down
FxaC_4g21760	FxaC_4g21760	PREDICTED: metal transporter Nramp3 [Fragaria vesca subsp. vesca]	0.244	-2.03252	1.70146e-18	4.82095e-16	yes	down
FxaC_26g34270	FxaC_26g34270	PREDICTED: hippocampus abundant transcript-like protein 1 isoform X1 [Fragaria vesca subsp. vesca]	0.149	-2.74331	1.85464e-18	5.22907e-16	yes	down
FxaC_5g23380	FxaC_5g23380	PREDICTED: NAC transcription factor 29 [Fragaria vesca subsp. vesca]	4.667	2.22262	1.91443e-18	5.3712e-16	yes	up
FxaC_15g28600	FxaC_15g28600	PREDICTED: protein CHLOROPLAST IMPORT APPARATUS 2-like isoform X2 [Fragaria vesca subsp. vesca]	2.576	1.36519	2.08332e-18	5.81653e-16	yes	up
FxaC_10g20660	FxaC_10g20660	PREDICTED: uncharacterized protein LOC101306310 [Fragaria vesca subsp. vesca]	0.099	-3.33227	2.45745e-18	6.82777e-16	yes	down
FxaC_1g08520	FxaC_1g08520	PREDICTED: nuclear transcription factor Y subunit A-3-like isoform X1 [Fragaria vesca subsp. vesca]	3.392	1.76202	2.47395e-18	6.84042e-16	yes	up
FxaC_10g05860	FxaC_10g05860	PREDICTED: tonoplast dicarboxylate transporter-like [Fragaria vesca subsp. vesca]	0.171	-2.54884	2.52521e-18	6.94857e-16	yes	down
FxaC_9g45470	FxaC_9g45470	PREDICTED: auxin-repressed 12.5 kDa protein [Fragaria vesca subsp. vesca]	3.247	1.69927	3.07917e-18	8.43237e-16	yes	up
FxaC_25g32380	FxaC_25g32380	PREDICTED: probable serine/threonine-protein kinase At1g01540 [Fragaria vesca subsp. vesca]	0.465	-1.10567	3.21295e-18	8.75682e-16	yes	down
FxaC_17g23720	FxaC_17g23720	PREDICTED: beta-amyrin 28-oxidase-like [Fragaria vesca subsp. vesca]	3.015	1.59199	3.30045e-18	8.95268e-16	yes	up
FxaC_24g41230	FxaC_24g41230	PREDICTED: GDSL esterase/lipase APG [Fragaria vesca subsp. vesca]	0.377	-1.40765	3.44647e-18	9.30467e-16	yes	down
FxaC_5g31580	FxaC_5g31580	PREDICTED: GATA transcription factor 5-like [Fragaria vesca subsp. vesca]	4.311	2.10794	3.96742e-18	1.06608e-15	yes	up
FxaC_8g26620	FxaC_8g26620	PREDICTED: putative laccase-9 [Fragaria vesca subsp. vesca]	2.445	1.28973	4.27668e-18	1.14381e-15	yes	up
FxaC_12g47850	FxaC_12g47850	PREDICTED: cysteine-rich repeat secretory protein 38-like [Fragaria vesca subsp. vesca]	4.385	2.13261	4.35943e-18	1.16052e-15	yes	up
FxaC_16g05480	FxaC_16g05480	PREDICTED: probable pectate lyase 8 [Fragaria vesca subsp. vesca]	0.311	-1.6828	4.39936e-18	1.16573e-15	yes	down
FxaC_4g35980	FxaC_4g35980	hypothetical protein RchiOBHm_Chr2g0089511 [Rosa chinensis]	0.174	-2.52367	4.77959e-18	1.26064e-15	yes	down
FxaC_3g31590	FxaC_3g31590	-	5.875	2.55467	4.98686e-18	1.30928e-15	yes	up
FxaC_13g05990	FxaC_13g05990	-	3.234	1.69339	5.65294e-18	1.47513e-15	yes	up
FxaC_22g16710	FxaC_22g16710	Chlorophyll a-b binding protein 40, chloroplastic [Trichinella nelsoni]	0.31	-1.69049	5.68065e-18	1.47513e-15	yes	down
FxaC_28g34030	FxaC_28g34030	PREDICTED: uncharacterized protein LOC101296999 [Fragaria vesca subsp. vesca]	2.772	1.47114	5.69587e-18	1.47513e-15	yes	up
FxaC_24g37370	FxaC_24g37370	PREDICTED: pyrophosphate-energized vacuolar membrane proton pump-like [Fragaria vesca subsp. vesca]	0.287	-1.8002	5.75979e-18	1.48496e-15	yes	down
FxaC_5g14550	FxaC_5g14550	Non-heme dioxygenase N-terminal domain-containing protein [Cynara cardunculus var. scolymus]	0.363	-1.46238	6.22095e-18	1.59666e-15	yes	down
FxaC_22g19810	FxaC_22g19810	PREDICTED: beta-amyrin synthase-like [Fragaria vesca subsp. vesca]	2.429	1.28035	7.31332e-18	1.86865e-15	yes	up
FxaC_26g35730	FxaC_26g35730	protein ZINC INDUCED FACILITATOR-LIKE 1-like isoform X1 [Rosa chinensis]	0.26	-1.94157	7.54061e-18	1.91816e-15	yes	down
FxaC_16g29230	FxaC_16g29230	PREDICTED: probable xyloglucan endotransglucosylase/hydrolase protein 33 [Fragaria vesca subsp. vesca]	0.207	-2.27176	7.60538e-18	1.92608e-15	yes	down
FxaC_9g45060	FxaC_9g45060	PREDICTED: uncharacterized protein LOC101293376 [Fragaria vesca subsp. vesca]	0.355	-1.49247	7.74792e-18	1.95046e-15	yes	down
FxaC_13g02120	FxaC_13g02120	PREDICTED: uncharacterized protein LOC101306925 [Fragaria vesca subsp. vesca]	3.575	1.83782	7.76982e-18	1.95046e-15	yes	up
FxaC_11g11910	FxaC_11g11910	PREDICTED: vacuolar-sorting receptor 6 [Fragaria vesca subsp. vesca]	3.644	1.86556	8.68346e-18	2.16086e-15	yes	up
FxaC_8g37370	FxaC_8g37370	PREDICTED: tubulin alpha chain [Fragaria vesca subsp. vesca]	0.268	-1.89966	9.59721e-18	2.37791e-15	yes	down
FxaC_5g19190	FxaC_5g19190	PREDICTED: U-box domain-containing protein 9 [Fragaria vesca subsp. vesca]	0.415	-1.2692	9.64917e-18	2.38047e-15	yes	down
FxaC_25g01440	FxaC_25g01440	PREDICTED: nuclear transcription factor Y subunit A-4-like isoform X1 [Fragaria vesca subsp. vesca]	4.265	2.09251	9.87675e-18	2.42616e-15	yes	up
FxaC_7g14190	FxaC_7g14190	PREDICTED: NAC transcription factor 29 [Fragaria vesca subsp. vesca]	4.937	2.3035	1.02458e-17	2.50605e-15	yes	up
FxaC_26g08360	FxaC_26g08360	PREDICTED: cytochrome P450 704C1-like [Fragaria vesca subsp. vesca]	4.144	2.05097	1.12443e-17	2.73859e-15	yes	up
FxaC_11g03580	FxaC_11g03580	PREDICTED: LRR receptor-like serine/threonine-protein kinase FLS2 [Fragaria vesca subsp. vesca]	0.176	-2.50662	1.14732e-17	2.7825e-15	yes	down
FxaC_6g09750	FxaC_6g09750	PREDICTED: transcription factor bHLH63 [Fragaria vesca subsp. vesca]	0.437	-1.19582	1.18856e-17	2.87035e-15	yes	down
FxaC_21g34470	FxaC_21g34470	PREDICTED: dnaJ homolog subfamily C member 2 [Fragaria vesca subsp. vesca]	0.265	-1.91418	1.21398e-17	2.91942e-15	yes	down
FxaC_24g07840	FxaC_24g07840	PREDICTED: receptor-like protein 12 isoform X1 [Fragaria vesca subsp. vesca]	4.388	2.13355	1.42746e-17	3.41844e-15	yes	up
FxaC_12g15760	FxaC_12g15760	pleiotropic drug resistance protein 2-like [Rosa chinensis]	2.608	1.38275	1.56817e-17	3.73977e-15	yes	up
FxaC_28g07780	FxaC_28g07780	PREDICTED: probable non-specific lipid-transfer protein AKCS9 [Fragaria vesca subsp. vesca]	3.177	1.66771	1.66483e-17	3.9538e-15	yes	up
FxaC_5g01230	FxaC_5g01230	PREDICTED: uncharacterized protein At2g23090-like [Fragaria vesca subsp. vesca]	0.444	-1.17192	1.93581e-17	4.57834e-15	yes	down
FxaC_10g00310	FxaC_10g00310	PREDICTED: GDSL esterase/lipase At1g29660-like [Fragaria vesca subsp. vesca]	0.132	-2.92493	2.13979e-17	5.03996e-15	yes	down
FxaC_5g28720	FxaC_5g28720	PREDICTED: LRR receptor-like serine/threonine-protein kinase GSO2 [Fragaria vesca subsp. vesca]	4.333	2.11535	2.32265e-17	5.426e-15	yes	up
FxaC_14g10980	FxaC_14g10980	PREDICTED: putative zinc finger protein At1g68190 isoform X1 [Fragaria vesca subsp. vesca]	0.385	-1.37747	2.58762e-17	6.02042e-15	yes	down
FxaC_1g21920	FxaC_1g21920	PREDICTED: uncharacterized protein LOC101304719 [Fragaria vesca subsp. vesca]	0.484	-1.04833	2.84443e-17	6.59114e-15	yes	down
FxaC_21g49400	FxaC_21g49400	PREDICTED: phenylalanine ammonia-lyase 1 [Fragaria vesca subsp. vesca]	2.15	1.10454	2.94338e-17	6.79292e-15	yes	up
FxaC_17g03600	FxaC_17g03600	PREDICTED: uncharacterized protein LOC101294764 [Fragaria vesca subsp. vesca]	3.883	1.95711	3.04196e-17	6.99224e-15	yes	up
FxaC_1g15770	FxaC_1g15770	PREDICTED: calcium uniporter protein 2, mitochondrial [Malus domestica]	0.217	-2.20632	3.58298e-17	8.20286e-15	yes	down
FxaC_8g02080	FxaC_8g02080	PREDICTED: indole-3-acetic acid-induced protein ARG2 [Fragaria vesca subsp. vesca]	2.714	1.44026	3.67125e-17	8.37148e-15	yes	up
FxaC_9g07600	FxaC_9g07600	hypothetical protein CUMW_123240 [Citrus unshiu]	2.77	1.47014	3.88342e-17	8.82015e-15	yes	up
FxaC_22g04690	FxaC_22g04690	Sulfatase [Corchorus olitorius]	3.072	1.61914	4.11799e-17	9.31593e-15	yes	up
FxaC_20g11120	FxaC_20g11120	PREDICTED: cytochrome P450 78A9-like [Fragaria vesca subsp. vesca]	3.562	1.83286	4.18852e-17	9.43818e-15	yes	up
FxaC_5g35980	FxaC_5g35980	PREDICTED: probable carboxylesterase 5 [Fragaria vesca subsp. vesca]	0.141	-2.8278	4.32466e-17	9.70673e-15	yes	down
FxaC_6g32720	FxaC_6g32720	PREDICTED: uncharacterized protein LOC101294233 [Fragaria vesca subsp. vesca]	3.765	1.91251	4.36723e-17	9.764e-15	yes	up
FxaC_4g36310	FxaC_4g36310	PREDICTED: zinc finger Ran-binding domain-containing protein 2 [Fragaria vesca subsp. vesca]	0.015	-6.08358	4.45643e-17	9.92467e-15	yes	down
FxaC_28g24350	FxaC_28g24350	PREDICTED: SPX domain-containing membrane protein At4g22990-like [Fragaria vesca subsp. vesca]	2.916	1.54412	4.73511e-17	1.05044e-14	yes	up
FxaC_11g06540	FxaC_11g06540	Recname: Full=Auxin-repressed 12.5 kDa protein >gi|22573|emb|CAA36676.1| 12.5 kDa protein [Fragaria x ananassa]	3.957	1.98447	4.92486e-17	1.08832e-14	yes	up
FxaC_25g15900	FxaC_25g15900	PREDICTED: uncharacterized protein LOC101309482 [Fragaria vesca subsp. vesca]	4.992	2.31955	5.14875e-17	1.13342e-14	yes	up
FxaC_22g23700	FxaC_22g23700	PREDICTED: GDSL esterase/lipase APG [Fragaria vesca subsp. vesca]	0.377	-1.40571	5.24128e-17	1.14937e-14	yes	down
FxaC_25g07290	FxaC_25g07290	protein ZINC INDUCED FACILITATOR-LIKE 1-like isoform X1 [Rosa chinensis]	0.392	-1.35176	5.42725e-17	1.18501e-14	yes	down
FxaC_18g43610	FxaC_18g43610	PREDICTED: uncharacterized protein At1g76660-like [Fragaria vesca subsp. vesca]	3.436	1.78053	5.44521e-17	1.18501e-14	yes	up
FxaC_12g21160	FxaC_12g21160	-	0.159	-2.65051	5.62546e-17	1.2196e-14	yes	down
FxaC_11g35160	FxaC_11g35160	PREDICTED: ferritin-4, chloroplastic [Fragaria vesca subsp. vesca]	2.895	1.53369	5.7981e-17	1.25228e-14	yes	up
FxaC_17g08610	FxaC_17g08610	PREDICTED: U-box domain-containing protein 52-like isoform X1 [Fragaria vesca subsp. vesca]	0.417	-1.26132	6.98607e-17	1.50319e-14	yes	down
FxaC_28g10160	FxaC_28g10160	PREDICTED: probable LRR receptor-like serine/threonine-protein kinase At3g47570 [Fragaria vesca subsp. vesca]	4.612	2.20535	7.10507e-17	1.52307e-14	yes	up
FxaC_17g55470	FxaC_17g55470	PREDICTED: nitrate reductase [NADH]	2.096	1.06767	8.66785e-17	1.85114e-14	yes	up
FxaC_12g29560	FxaC_12g29560	PREDICTED: cysteine-rich receptor-like protein kinase 29 [Fragaria vesca subsp. vesca]	4.135	2.04796	8.92234e-17	1.8984e-14	yes	up
FxaC_23g04330	FxaC_23g04330	PREDICTED: nuclear transcription factor Y subunit A-3 [Fragaria vesca subsp. vesca]	3.796	1.9244	9.8994e-17	2.09754e-14	yes	up
FxaC_4g37030	FxaC_4g37030	PREDICTED: uncharacterized protein LOC101314594 [Fragaria vesca subsp. vesca]	2.69	1.42741	9.93157e-17	2.09754e-14	yes	up
FxaC_9g05310	FxaC_9g05310	PREDICTED: trans-cinnamate 4-monooxygenase [Fragaria vesca subsp. vesca]	2.274	1.18504	1.0097e-16	2.12464e-14	yes	up
FxaC_27g41470	FxaC_27g41470	PREDICTED: uncharacterized protein LOC101305600 [Fragaria vesca subsp. vesca]	0.279	-1.83914	1.02e-16	2.13845e-14	yes	down
FxaC_24g46050	FxaC_24g46050	PREDICTED: glucan endo-1,3-beta-glucosidase, basic isoform-like [Fragaria vesca subsp. vesca]	3.604	1.84979	1.1062e-16	2.3107e-14	yes	up
FxaC_19g07390	FxaC_19g07390	PREDICTED: leucine-rich repeat receptor-like serine/threonine/tyrosine-protein kinase SOBIR1 [Fragaria vesca subsp. vesca]	2.977	1.57405	1.16522e-16	2.42514e-14	yes	up
FxaC_20g01560	FxaC_20g01560	PREDICTED: LOW QUALITY PROTEIN: hydroxymethylglutaryl-CoA synthase [Fragaria vesca subsp. vesca]	2.644	1.40258	1.24623e-16	2.58435e-14	yes	up
FxaC_23g35290	FxaC_23g35290	PREDICTED: probable receptor-like protein kinase At5g18500 [Fragaria vesca subsp. vesca]	0.415	-1.26809	1.28386e-16	2.65276e-14	yes	down
FxaC_26g15240	FxaC_26g15240	PREDICTED: expansin-A4-like [Fragaria vesca subsp. vesca]	4.521	2.17663	1.42538e-16	2.9346e-14	yes	up
FxaC_4g28980	FxaC_4g28980	PREDICTED: thiosulfate sulfurtransferase 16, chloroplastic-like [Fragaria vesca subsp. vesca]	0.328	-1.60826	1.45979e-16	2.99467e-14	yes	down
FxaC_18g01530	FxaC_18g01530	PREDICTED: nitrate reductase [NADH]	3.067	1.61681	1.49522e-16	3.05639e-14	yes	up
FxaC_1g29560	FxaC_1g29560	PREDICTED: uncharacterized protein LOC101295653 [Fragaria vesca subsp. vesca]	7.623	2.93029	1.62873e-16	3.31746e-14	yes	up
FxaC_8g32770	FxaC_8g32770	PREDICTED: probable carboxylesterase 5 [Fragaria vesca subsp. vesca]	0.035	-4.85059	1.83144e-16	3.7171e-14	yes	down
FxaC_27g23460	FxaC_27g23460	PREDICTED: probable leucine-rich repeat receptor-like protein kinase At1g35710, partial [Fragaria vesca subsp. vesca]	4.325	2.11286	2.0311e-16	4.10778e-14	yes	up
FxaC_12g10190	FxaC_12g10190	PREDICTED: metallothionein-like protein 1 [Fragaria vesca subsp. vesca]	0.288	-1.79809	2.24582e-16	4.52604e-14	yes	down
FxaC_25g56410	FxaC_25g56410	PREDICTED: 3-ketoacyl-CoA synthase 21-like [Fragaria vesca subsp. vesca]	5.037	2.33263	2.69758e-16	5.41741e-14	yes	up
FxaC_9g52200	FxaC_9g52200	PREDICTED: G-type lectin S-receptor-like serine/threonine-protein kinase RKS1 [Fragaria vesca subsp. vesca]	3.474	1.79656	2.84888e-16	5.70125e-14	yes	up
FxaC_18g00650	FxaC_18g00650	-	0.324	-1.62402	2.8663e-16	5.71612e-14	yes	down
FxaC_21g48320	FxaC_21g48320	PREDICTED: aquaporin TIP1-1-like [Fragaria vesca subsp. vesca]	0.33	-1.60093	2.95605e-16	5.87463e-14	yes	down
FxaC_10g22780	FxaC_10g22780	PREDICTED: chlorophyll a-b binding protein 13, chloroplastic [Fragaria vesca subsp. vesca]	0.311	-1.68509	3.06946e-16	6.07891e-14	yes	down
FxaC_13g17810	FxaC_13g17810	hypothetical protein LR48_Vigan02g245000 [Vigna angularis]	2.958	1.5644	3.67226e-16	7.21571e-14	yes	up
FxaC_3g18730	FxaC_3g18730	PREDICTED: metal transporter Nramp3 [Fragaria vesca subsp. vesca]	0.454	-1.13773	3.68129e-16	7.21571e-14	yes	down
FxaC_10g04250	FxaC_10g04250	putative protein kinase RLK-Pelle-DLSV family [Rosa chinensis]	3.225	1.6893	3.76211e-16	7.34895e-14	yes	up
FxaC_17g56000	FxaC_17g56000	uncharacterized protein LOC112180766 [Rosa chinensis]	0.257	-1.96236	4.28555e-16	8.34297e-14	yes	down
FxaC_24g11040	FxaC_24g11040	PREDICTED: uncharacterized protein LOC101293694 isoform X2 [Fragaria vesca subsp. vesca]	4.096	2.03424	4.46342e-16	8.63053e-14	yes	up
FxaC_16g01480	FxaC_16g01480	PREDICTED: protein argonaute 10 [Fragaria vesca subsp. vesca]	3.658	1.87121	4.66624e-16	8.99233e-14	yes	up
FxaC_25g26530	FxaC_25g26530	PREDICTED: receptor-like protein 12 [Fragaria vesca subsp. vesca]	19.422	4.27962	4.8504e-16	9.31586e-14	yes	up
FxaC_21g02740	FxaC_21g02740	PREDICTED: probable inactive leucine-rich repeat receptor-like protein kinase At3g03770 [Fragaria vesca subsp. vesca]	0.239	-2.06663	5.05724e-16	9.68063e-14	yes	down
FxaC_23g27510	FxaC_23g27510	PREDICTED: protein ALUMINUM SENSITIVE 3 isoform X1 [Fragaria vesca subsp. vesca]	0.401	-1.31932	5.70087e-16	1.08763e-13	yes	down
FxaC_25g34590	FxaC_25g34590	PREDICTED: bifunctional fucokinase/fucose pyrophosphorylase [Fragaria vesca subsp. vesca]	0.494	-1.01656	5.81054e-16	1.10487e-13	yes	down
FxaC_15g01690	FxaC_15g01690	PREDICTED: uncharacterized protein LOC101306925 [Fragaria vesca subsp. vesca]	2.848	1.50975	6.35525e-16	1.20445e-13	yes	up
FxaC_27g52970	FxaC_27g52970	PREDICTED: LOW QUALITY PROTEIN: 4-coumarate--CoA ligase 2-like [Fragaria vesca subsp. vesca]	2.039	1.0277	6.48526e-16	1.22503e-13	yes	up
FxaC_20g21540	FxaC_20g21540	PREDICTED: phospholipase A1-Ibeta2, chloroplastic [Fragaria vesca subsp. vesca]	3.005	1.5874	6.82594e-16	1.28514e-13	yes	up
FxaC_7g19930	FxaC_7g19930	PREDICTED: early light-induced protein 1, chloroplastic-like [Fragaria vesca subsp. vesca]	15.261	3.93182	7.11048e-16	1.33432e-13	yes	up
FxaC_10g15320	FxaC_10g15320	-	7.714	2.94744	7.2304e-16	1.35239e-13	yes	up
FxaC_27g37470	FxaC_27g37470	PREDICTED: uncharacterized protein LOC101296040 [Fragaria vesca subsp. vesca]	0.15	-2.73492	7.41736e-16	1.38284e-13	yes	down
FxaC_1g20150	FxaC_1g20150	PREDICTED: calcium-transporting ATPase 2, plasma membrane-type-like [Fragaria vesca subsp. vesca]	2.809	1.49001	7.47466e-16	1.389e-13	yes	up
FxaC_28g22920	FxaC_28g22920	PREDICTED: probable leucine-rich repeat receptor-like protein kinase At1g35710, partial [Fragaria vesca subsp. vesca]	4.238	2.08336	9.51742e-16	1.76288e-13	yes	up
FxaC_19g39640	FxaC_19g39640	PREDICTED: leucoanthocyanidin dioxygenase-like [Fragaria vesca subsp. vesca]	3.884	1.95769	9.59532e-16	1.77157e-13	yes	up
FxaC_12g33860	FxaC_12g33860	hypothetical protein CUMW_167740 [Citrus unshiu]	0.261	-1.93534	9.73953e-16	1.79242e-13	yes	down
FxaC_23g03550	FxaC_23g03550	PREDICTED: linoleate 13S-lipoxygenase 3-1, chloroplastic-like [Fragaria vesca subsp. vesca]	3.129	1.64557	1.02785e-15	1.88554e-13	yes	up
FxaC_2g01110	FxaC_2g01110	PREDICTED: auxin-binding protein ABP19a [Fragaria vesca subsp. vesca]	0.357	-1.48567	1.03797e-15	1.89198e-13	yes	down
FxaC_2g13440	FxaC_2g13440	PREDICTED: auxin-binding protein ABP19a [Fragaria vesca subsp. vesca]	0.357	-1.48567	1.03797e-15	1.89198e-13	yes	down
FxaC_14g17260	FxaC_14g17260	PREDICTED: S-adenosylmethionine synthase 2 [Fragaria vesca subsp. vesca]	0.403	-1.31116	1.13185e-15	2.05655e-13	yes	down
FxaC_20g07690	FxaC_20g07690	PREDICTED: BTB/POZ and TAZ domain-containing protein 1 isoform X2 [Fragaria vesca subsp. vesca]	3.687	1.88235	1.15982e-15	2.1007e-13	yes	up
FxaC_3g27550	FxaC_3g27550	PREDICTED: G-type lectin S-receptor-like serine/threonine-protein kinase RLK1 [Fragaria vesca subsp. vesca]	3.193	1.67489	1.25509e-15	2.25896e-13	yes	up
FxaC_15g10760	FxaC_15g10760	PREDICTED: putative zinc finger protein At1g68190 isoform X1 [Fragaria vesca subsp. vesca]	0.324	-1.62806	1.3335e-15	2.38878e-13	yes	down
FxaC_21g10980	FxaC_21g10980	PREDICTED: F-box/kelch-repeat protein At3g06240-like [Fragaria vesca subsp. vesca]	0.432	-1.20939	1.33556e-15	2.38878e-13	yes	down
FxaC_2g06620	FxaC_2g06620	PREDICTED: aldehyde dehydrogenase family 2 member C4-like [Fragaria vesca subsp. vesca]	0.231	-2.1156	1.34317e-15	2.3949e-13	yes	down
FxaC_18g02470	FxaC_18g02470	PREDICTED: 1-aminocyclopropane-1-carboxylate oxidase homolog [Fragaria vesca subsp. vesca]	4.251	2.08769	1.47817e-15	2.62743e-13	yes	up
FxaC_22g15440	FxaC_22g15440	PREDICTED: myosin-10 [Fragaria vesca subsp. vesca]	2.173	1.1196	1.48897e-15	2.63843e-13	yes	up
FxaC_6g44880	FxaC_6g44880	dihydroflavonol 4-reductase [Fragaria x ananassa]	2.127	1.08862	1.53183e-15	2.706e-13	yes	up
FxaC_18g16100	FxaC_18g16100	cinnamoyl-CoA reductase 1 isoform X1 [Rosa chinensis]	0.341	-1.55261	1.71292e-15	3.01218e-13	yes	down
FxaC_22g68110	FxaC_22g68110	PREDICTED: receptor-like protein 12 isoform X2 [Fragaria vesca subsp. vesca]	3.852	1.94556	1.71568e-15	3.01218e-13	yes	up
FxaC_18g45040	FxaC_18g45040	PREDICTED: LOW QUALITY PROTEIN: hydroxymethylglutaryl-CoA synthase [Fragaria vesca subsp. vesca]	2.319	1.2134	1.7533e-15	3.06e-13	yes	up
FxaC_9g50550	FxaC_9g50550	PREDICTED: polyphenol oxidase, chloroplastic-like [Fragaria vesca subsp. vesca]	2.292	1.19683	1.75361e-15	3.06e-13	yes	up
FxaC_9g24200	FxaC_9g24200	PREDICTED: outer envelope protein 61 isoform X2 [Fragaria vesca subsp. vesca]	2.161	1.11178	1.76165e-15	3.06467e-13	yes	up
FxaC_28g21680	FxaC_28g21680	PREDICTED: probable serine/threonine-protein kinase At1g01540 [Fragaria vesca subsp. vesca]	0.427	-1.2264	1.81331e-15	3.145e-13	yes	down
FxaC_5g03720	FxaC_5g03720	PREDICTED: transcription factor TT2-like [Fragaria vesca subsp. vesca]	3.555	1.82996	1.86437e-15	3.22378e-13	yes	up
FxaC_28g30450	FxaC_28g30450	PREDICTED: protein NRT1/ PTR FAMILY 7.2-like [Fragaria vesca subsp. vesca]	4.252	2.08798	1.93733e-15	3.33985e-13	yes	up
FxaC_22g22630	FxaC_22g22630	PREDICTED: putative phospholipid-transporting ATPase 4 [Fragaria vesca subsp. vesca]	2.535	1.34217	1.95718e-15	3.36394e-13	yes	up
FxaC_13g53820	FxaC_13g53820	PREDICTED: lysM domain receptor-like kinase 4 [Fragaria vesca subsp. vesca]	2.609	1.38328	2.02075e-15	3.4628e-13	yes	up
FxaC_15g06340	FxaC_15g06340	PREDICTED: cyclic dof factor 3 [Fragaria vesca subsp. vesca]	3.635	1.8618	2.09599e-15	3.58101e-13	yes	up
FxaC_9g51840	FxaC_9g51840	PREDICTED: G-type lectin S-receptor-like serine/threonine-protein kinase SD1-29 [Fragaria vesca subsp. vesca]	5.806	2.53758	2.13734e-15	3.6408e-13	yes	up
FxaC_5g37190	FxaC_5g37190	PREDICTED: abscisate beta-glucosyltransferase-like [Fragaria vesca subsp. vesca]	0.348	-1.52354	2.21865e-15	3.76808e-13	yes	down
FxaC_10g46070	FxaC_10g46070	PREDICTED: trans-cinnamate 4-monooxygenase [Fragaria vesca subsp. vesca]	2.236	1.16102	2.40042e-15	4.06474e-13	yes	up
FxaC_19g40790	FxaC_19g40790	PREDICTED: nitrate reductase [NADH]	2.479	1.31002	2.59553e-15	4.36926e-13	yes	up
FxaC_23g26460	FxaC_23g26460	extensin-like [Rosa chinensis]	0.322	-1.63527	2.63844e-15	4.41553e-13	yes	down
FxaC_27g07390	FxaC_27g07390	PREDICTED: hippocampus abundant transcript-like protein 1 isoform X1 [Fragaria vesca subsp. vesca]	0.207	-2.27003	2.74253e-15	4.57635e-13	yes	down
FxaC_6g02460	FxaC_6g02460	PREDICTED: tubulin alpha chain [Fragaria vesca subsp. vesca]	0.359	-1.47629	3.11402e-15	5.18113e-13	yes	down
FxaC_5g20950	FxaC_5g20950	PREDICTED: protein EXORDIUM-like 5 [Fragaria vesca subsp. vesca]	0.4	-1.32243	3.22598e-15	5.35185e-13	yes	down
FxaC_7g36510	FxaC_7g36510	PREDICTED: patatin-like protein 2 [Fragaria vesca subsp. vesca]	3.543	1.82516	3.23877e-15	5.35755e-13	yes	up
FxaC_1g27910	FxaC_1g27910	G-type lectin S-receptor-like serine/threonine-protein kinase LECRK3 [Rosa chinensis]	3.528	1.81865	3.25903e-15	5.37553e-13	yes	up
FxaC_5g13430	FxaC_5g13430	PREDICTED: calcium-transporting ATPase 12, plasma membrane-type [Fragaria vesca subsp. vesca]	2.385	1.2542	3.35479e-15	5.51756e-13	yes	up
FxaC_22g07550	FxaC_22g07550	PREDICTED: protein EXORDIUM-like 5 [Fragaria vesca subsp. vesca]	0.327	-1.61477	3.48447e-15	5.71443e-13	yes	down
FxaC_17g51770	FxaC_17g51770	PREDICTED: purine permease 3-like [Fragaria vesca subsp. vesca]	3.75	1.90673	3.57585e-15	5.84316e-13	yes	up
FxaC_6g27270	FxaC_6g27270	PREDICTED: calcium-transporting ATPase 12, plasma membrane-type [Fragaria vesca subsp. vesca]	2.651	1.40646	3.58338e-15	5.84316e-13	yes	up
FxaC_25g26380	FxaC_25g26380	PREDICTED: receptor-like protein 12 [Fragaria vesca subsp. vesca]	7.545	2.91561	3.60755e-15	5.86585e-13	yes	up
FxaC_28g08720	FxaC_28g08720	PREDICTED: transcription factor SCREAM2 isoform X1 [Fragaria vesca subsp. vesca]	0.224	-2.15575	3.76047e-15	6.09719e-13	yes	down
FxaC_12g32150	FxaC_12g32150	PREDICTED: probable leucine-rich repeat receptor-like serine/threonine-protein kinase At3g14840 isoform X1 [Fragaria vesca subsp. vesca]	2.044	1.0314	3.81983e-15	6.17593e-13	yes	up
FxaC_22g21820	FxaC_22g21820	PREDICTED: auxin-binding protein ABP19a [Fragaria vesca subsp. vesca]	0.436	-1.197	4.00847e-15	6.45009e-13	yes	down
FxaC_24g45360	FxaC_24g45360	PREDICTED: beta-amyrin synthase-like [Fragaria vesca subsp. vesca]	2.309	1.20721	4.12371e-15	6.61123e-13	yes	up
FxaC_21g62470	FxaC_21g62470	PREDICTED: uncharacterized protein LOC101293694 isoform X2 [Fragaria vesca subsp. vesca]	3.815	1.93155	4.35227e-15	6.95816e-13	yes	up
FxaC_19g41450	FxaC_19g41450	uncharacterized protein LOC112180766 [Rosa chinensis]	0.438	-1.19	4.90974e-15	7.82755e-13	yes	down
FxaC_13g24560	FxaC_13g24560	PREDICTED: pleiotropic drug resistance protein 3-like [Fragaria vesca subsp. vesca]	2.552	1.35153	5.14524e-15	8.18022e-13	yes	up
FxaC_21g51720	FxaC_21g51720	PREDICTED: cation/H(+) antiporter 20 [Fragaria vesca subsp. vesca]	2.331	1.22096	5.68654e-15	9.01577e-13	yes	up
FxaC_21g55140	FxaC_21g55140	PREDICTED: lactosylceramide 4-alpha-galactosyltransferase-like [Fragaria vesca subsp. vesca]	0.332	-1.59237	5.73772e-15	9.07177e-13	yes	down
FxaC_2g03940	FxaC_2g03940	-	0.393	-1.34682	6.01227e-15	9.45364e-13	yes	down
FxaC_13g17280	FxaC_13g17280	PREDICTED: ribulose bisphosphate carboxylase small chain 1, chloroplastic [Fragaria vesca subsp. vesca]	2.389	1.25665	6.10654e-15	9.57555e-13	yes	up
FxaC_9g51790	FxaC_9g51790	PREDICTED: uncharacterized protein LOC101311743 [Fragaria vesca subsp. vesca]	2.2	1.13738	6.18132e-15	9.64e-13	yes	up
FxaC_15g34490	FxaC_15g34490	PREDICTED: probable pectate lyase 8 [Fragaria vesca subsp. vesca]	0.392	-1.34935	7.5264e-15	1.17058e-12	yes	down
FxaC_6g09870	FxaC_6g09870	PREDICTED: isoflavone reductase homolog [Fragaria vesca subsp. vesca]	0.346	-1.52912	7.64631e-15	1.18529e-12	yes	down
FxaC_17g22680	FxaC_17g22680	PREDICTED: uncharacterized protein LOC101292421 [Fragaria vesca subsp. vesca]	2.337	1.22475	7.66241e-15	1.18529e-12	yes	up
FxaC_26g33950	FxaC_26g33950	PREDICTED: probable receptor-like protein kinase At1g67000 [Fragaria vesca subsp. vesca]	6.613	2.72535	8.42427e-15	1.29614e-12	yes	up
FxaC_18g44540	FxaC_18g44540	unnamed protein product [Coffea canephora]	5.232	2.38729	9.48342e-15	1.44742e-12	yes	up
FxaC_8g21180	FxaC_8g21180	PREDICTED: hyoscyamine 6-dioxygenase-like isoform X3 [Fragaria vesca subsp. vesca]	0.358	-1.48167	9.70299e-15	1.477e-12	yes	down
FxaC_24g21130	FxaC_24g21130	phenylalanine ammonia-lyase 2 [Fragaria x ananassa]	2.17	1.11761	9.83355e-15	1.49008e-12	yes	up
FxaC_10g07790	FxaC_10g07790	PREDICTED: probable LRR receptor-like serine/threonine-protein kinase RFK1 isoform X1 [Fragaria vesca subsp. vesca]	11.839	3.56551	9.84104e-15	1.49008e-12	yes	up
FxaC_7g28200	FxaC_7g28200	PREDICTED: uncharacterized protein LOC101304340 [Fragaria vesca subsp. vesca]	0.276	-1.85806	1.00218e-14	1.51345e-12	yes	down
FxaC_24g17550	FxaC_24g17550	PREDICTED: uncharacterized protein LOC101305773 [Fragaria vesca subsp. vesca]	0.374	-1.4192	1.06448e-14	1.6033e-12	yes	down
FxaC_3g04160	FxaC_3g04160	-	0.143	-2.80582	1.11471e-14	1.67455e-12	yes	down
FxaC_26g36530	FxaC_26g36530	PREDICTED: probable carboxylesterase 15 [Fragaria vesca subsp. vesca]	4.149	2.05281	1.16298e-14	1.74249e-12	yes	up
FxaC_23g13770	FxaC_23g13770	PREDICTED: thioredoxin M-type, chloroplastic [Fragaria vesca subsp. vesca]	0.227	-2.1421	1.24496e-14	1.86044e-12	yes	down
FxaC_19g17140	FxaC_19g17140	PREDICTED: aspartic proteinase nepenthesin-2 [Fragaria vesca subsp. vesca]	0.094	-3.40876	1.41616e-14	2.11078e-12	yes	down
FxaC_22g73350	FxaC_22g73350	PREDICTED: ferritin-3, chloroplastic [Fragaria vesca subsp. vesca]	4.077	2.02748	1.47358e-14	2.19066e-12	yes	up
FxaC_27g28490	FxaC_27g28490	WRKY transcription factor 51 [Fragaria vesca]	2.509	1.32729	1.49672e-14	2.21929e-12	yes	up
FxaC_11g36250	FxaC_11g36250	PREDICTED: transcription factor MYB59 [Fragaria vesca subsp. vesca]	11.906	3.57368	1.53236e-14	2.26626e-12	yes	up
FxaC_15g02960	FxaC_15g02960	uncharacterized protein LOC112163762 [Rosa chinensis]	2.184	1.12698	1.57403e-14	2.3219e-12	yes	up
FxaC_14g07240	FxaC_14g07240	PREDICTED: UDP-glucose 6-dehydrogenase 2 [Fragaria vesca subsp. vesca]	0.423	-1.24034	1.58481e-14	2.33179e-12	yes	down
FxaC_1g26140	FxaC_1g26140	PREDICTED: transcription factor TGA4-like isoform X1 [Fragaria vesca subsp. vesca]	3.278	1.71285	1.6176e-14	2.37393e-12	yes	up
FxaC_22g22350	FxaC_22g22350	PREDICTED: nuclear transcription factor Y subunit A-3 [Fragaria vesca subsp. vesca]	2.373	1.24681	1.78802e-14	2.61064e-12	yes	up
FxaC_27g23340	FxaC_27g23340	PREDICTED: probable leucine-rich repeat receptor-like protein kinase At1g35710, partial [Fragaria vesca subsp. vesca]	4.159	2.05621	1.83844e-14	2.67744e-12	yes	up
FxaC_27g26710	FxaC_27g26710	PREDICTED: BURP domain-containing protein 3-like [Fragaria vesca subsp. vesca]	2.38	1.25116	1.93777e-14	2.81493e-12	yes	up
FxaC_28g37500	FxaC_28g37500	PREDICTED: nuclear transcription factor Y subunit A-4-like isoform X1 [Fragaria vesca subsp. vesca]	3.477	1.79785	2.00913e-14	2.9112e-12	yes	up
FxaC_20g24650	FxaC_20g24650	PREDICTED: cinnamoyl-CoA reductase 2-like [Fragaria vesca subsp. vesca]	2.315	1.21123	2.13363e-14	3.08379e-12	yes	up
FxaC_6g09010	FxaC_6g09010	PREDICTED: polyol transporter 5-like [Fragaria vesca subsp. vesca]	2.111	1.07796	2.26964e-14	3.27211e-12	yes	up
FxaC_24g48260	FxaC_24g48260	PREDICTED: myosin-10 [Fragaria vesca subsp. vesca]	2.476	1.30773	2.45733e-14	3.53381e-12	yes	up
FxaC_22g07330	FxaC_22g07330	PREDICTED: cyclic nucleotide-gated ion channel 2 [Fragaria vesca subsp. vesca]	0.468	-1.09455	2.46693e-14	3.53872e-12	yes	down
FxaC_10g29210	FxaC_10g29210	PREDICTED: probable CCR4-associated factor 1 homolog 11 [Fragaria vesca subsp. vesca]	3.557	1.83065	2.63385e-14	3.76871e-12	yes	up
FxaC_4g18200	FxaC_4g18200	UDP-glycosyltransferase 91A1-like [Rosa chinensis]	0.3	-1.73796	2.64941e-14	3.78152e-12	yes	down
FxaC_5g06240	FxaC_5g06240	PREDICTED: pEARLI1-like lipid transfer protein 1 [Fragaria vesca subsp. vesca]	0.479	-1.0628	2.67238e-14	3.80482e-12	yes	down
FxaC_13g17740	FxaC_13g17740	PREDICTED: uncharacterized protein LOC101308084 [Fragaria vesca subsp. vesca]	0.321	-1.63749	3.12018e-14	4.43136e-12	yes	down
FxaC_25g32660	FxaC_25g32660	PREDICTED: uncharacterized protein LOC101306460 [Fragaria vesca subsp. vesca]	12.51	3.64505	3.15262e-14	4.46634e-12	yes	up
FxaC_20g05300	FxaC_20g05300	PREDICTED: probable WRKY transcription factor 53 [Fragaria vesca subsp. vesca]	4.777	2.25604	3.24537e-14	4.58205e-12	yes	up
FxaC_20g27530	FxaC_20g27530	PREDICTED: receptor-like protein 12 isoform X3 [Fragaria vesca subsp. vesca]	2.748	1.45843	3.2503e-14	4.58205e-12	yes	up
FxaC_19g21790	FxaC_19g21790	PREDICTED: cinnamoyl-CoA reductase 2-like [Fragaria vesca subsp. vesca]	3.977	1.99186	3.37713e-14	4.7375e-12	yes	up
FxaC_20g35400	FxaC_20g35400	PREDICTED: protein NRT1/ PTR FAMILY 5.10-like [Fragaria vesca subsp. vesca]	0.34	-1.55506	3.6445e-14	5.0814e-12	yes	down
FxaC_15g40850	FxaC_15g40850	PREDICTED: beta-amyrin 28-oxidase-like [Fragaria vesca subsp. vesca]	2.504	1.32451	3.64891e-14	5.0814e-12	yes	up
FxaC_18g42920	FxaC_18g42920	PREDICTED: uncharacterized protein LOC101294764 [Fragaria vesca subsp. vesca]	3.874	1.95374	3.68728e-14	5.12237e-12	yes	up
FxaC_1g20030	FxaC_1g20030	PREDICTED: BTB/POZ and TAZ domain-containing protein 4 [Fragaria vesca subsp. vesca]	0.087	-3.51827	4.04288e-14	5.60277e-12	yes	down
FxaC_2g23700	FxaC_2g23700	PREDICTED: calcium-transporting ATPase 2, plasma membrane-type-like [Fragaria vesca subsp. vesca]	3.883	1.95722	4.98967e-14	6.86499e-12	yes	up
FxaC_25g23050	FxaC_25g23050	transcriptional activator Myb [Fragaria vesca]	3.477	1.79795	5.1831e-14	7.11402e-12	yes	up
FxaC_9g07760	FxaC_9g07760	transcription factor SCREAM2-like [Rosa chinensis]	0.234	-2.09552	5.4892e-14	7.51613e-12	yes	down
FxaC_22g49880	FxaC_22g49880	PREDICTED: heparan-alpha-glucosaminide N-acetyltransferase-like [Fragaria vesca subsp. vesca]	0.188	-2.41426	5.50244e-14	7.51628e-12	yes	down
FxaC_14g03280	FxaC_14g03280	PREDICTED: glycerophosphodiester phosphodiesterase protein kinase domain-containing GDPDL2-like [Fragaria vesca subsp. vesca]	2.243	1.16528	5.81198e-14	7.92021e-12	yes	up
FxaC_2g11650	FxaC_2g11650	PREDICTED: uncharacterized protein LOC101306848 [Fragaria vesca subsp. vesca]	0.002	-9.18834	6.00591e-14	8.16505e-12	yes	down
FxaC_6g44560	FxaC_6g44560	PREDICTED: BTB/POZ domain-containing protein At2g30600 [Fragaria vesca subsp. vesca]	2.576	1.36528	6.19241e-14	8.39864e-12	yes	up
FxaC_13g47480	FxaC_13g47480	-	2.34	1.22626	6.25359e-14	8.46157e-12	yes	up
FxaC_10g03650	FxaC_10g03650	G-type lectin S-receptor-like serine/threonine-protein kinase At1g11410 isoform X2 [Rosa chinensis]	4.063	2.02257	6.47e-14	8.73374e-12	yes	up
FxaC_26g00510	FxaC_26g00510	putative multi antimicrobial extrusion protein [Rosa chinensis]	2.297	1.19988	6.69705e-14	9.01895e-12	yes	up
FxaC_25g35680	FxaC_25g35680	PREDICTED: protein LHY-like [Fragaria vesca subsp. vesca]	3.06	1.61338	6.91617e-14	9.29218e-12	yes	up
FxaC_24g46880	FxaC_24g46880	PREDICTED: trifunctional UDP-glucose 4,6-dehydratase/UDP-4-keto-6-deoxy-D-glucose 3,5-epimerase/UDP-4-keto-L-rhamnose-reductase RHM1-like [Fragaria vesca subsp. vesca]	0.441	-1.1826	7.07834e-14	9.48779e-12	yes	down
FxaC_21g26130	FxaC_21g26130	PREDICTED: eukaryotic initiation factor 4A-6-like [Fragaria vesca subsp. vesca]	0.41	-1.28515	7.47144e-14	9.96802e-12	yes	down
FxaC_11g00360	FxaC_11g00360	PREDICTED: G-type lectin S-receptor-like serine/threonine-protein kinase SD1-29 [Fragaria vesca subsp. vesca]	2.951	1.56128	7.49562e-14	9.97702e-12	yes	up
FxaC_18g46140	FxaC_18g46140	PREDICTED: legumain [Fragaria vesca subsp. vesca]	4.999	2.32164	7.59242e-14	1.00824e-11	yes	up
FxaC_13g54430	FxaC_13g54430	PREDICTED: protein argonaute 10 [Fragaria vesca subsp. vesca]	2.78	1.47495	7.83955e-14	1.03865e-11	yes	up
FxaC_27g23260	FxaC_27g23260	serine/threonine-protein kinase BSK3-like isoform X1 [Rosa chinensis]	3.643	1.86499	8.18552e-14	1.08198e-11	yes	up
FxaC_18g35920	FxaC_18g35920	PREDICTED: hyoscyamine 6-dioxygenase-like [Fragaria vesca subsp. vesca]	0.057	-4.13648	1.02487e-13	1.3423e-11	yes	down
FxaC_14g06800	FxaC_14g06800	PREDICTED: phosphate transporter PHO1 homolog 3-like [Fragaria vesca subsp. vesca]	6.571	2.71614	1.08104e-13	1.41264e-11	yes	up
FxaC_16g00170	FxaC_16g00170	PREDICTED: beta-amyrin 28-oxidase-like [Fragaria vesca subsp. vesca]	2.938	1.5549	1.13083e-13	1.47433e-11	yes	up
FxaC_11g34130	FxaC_11g34130	PREDICTED: MLO-like protein 6 [Fragaria vesca subsp. vesca]	3.372	1.75373	1.15485e-13	1.50222e-11	yes	up
FxaC_24g03520	FxaC_24g03520	PREDICTED: receptor-like protein 12 [Fragaria vesca subsp. vesca]	4.234	2.08209	1.24122e-13	1.61091e-11	yes	up
FxaC_22g64750	FxaC_22g64750	hypothetical protein CUMW_154780 [Citrus unshiu]	0.207	-2.27324	1.2636e-13	1.63625e-11	yes	down
FxaC_28g32760	FxaC_28g32760	PREDICTED: hippocampus abundant transcript-like protein 1 isoform X1 [Fragaria vesca subsp. vesca]	0.166	-2.59202	1.29203e-13	1.66928e-11	yes	down
FxaC_22g57860	FxaC_22g57860	PREDICTED: probable WRKY transcription factor 33 [Fragaria vesca subsp. vesca]	2.776	1.47293	1.39851e-13	1.80279e-11	yes	up
FxaC_23g40370	FxaC_23g40370	PREDICTED: uncharacterized protein LOC101310870 [Fragaria vesca subsp. vesca]	3.129	1.64585	1.52534e-13	1.96187e-11	yes	up
FxaC_26g19470	FxaC_26g19470	PREDICTED: protein LHY-like [Fragaria vesca subsp. vesca]	3.392	1.76211	1.53765e-13	1.97326e-11	yes	up
FxaC_15g21470	FxaC_15g21470	PREDICTED: mitogen-activated protein kinase 16 [Fragaria vesca subsp. vesca]	2.074	1.05266	1.55124e-13	1.98625e-11	yes	up
FxaC_21g09330	FxaC_21g09330	PREDICTED: protein EXORDIUM-like 5 [Fragaria vesca subsp. vesca]	0.44	-1.18394	1.59233e-13	2.03431e-11	yes	down
FxaC_7g17450	FxaC_7g17450	PREDICTED: dCTP pyrophosphatase 1-like [Fragaria vesca subsp. vesca]	2.259	1.17587	1.60324e-13	2.04368e-11	yes	up
FxaC_18g27400	FxaC_18g27400	PREDICTED: dihydropyrimidine dehydrogenase [NADP(+)]	0.411	-1.28316	1.67344e-13	2.12329e-11	yes	down
FxaC_16g30300	FxaC_16g30300	PREDICTED: uncharacterized protein LOC101306925 [Fragaria vesca subsp. vesca]	2.989	1.57979	1.67682e-13	2.12329e-11	yes	up
FxaC_17g36200	FxaC_17g36200	PREDICTED: uncharacterized protein LOC101298030 [Fragaria vesca subsp. vesca]	0.225	-2.15238	1.77946e-13	2.24829e-11	yes	down
FxaC_1g01670	FxaC_1g01670	PREDICTED: G-type lectin S-receptor-like serine/threonine-protein kinase At1g11330 [Fragaria vesca subsp. vesca]	5.115	2.35478	1.82306e-13	2.29325e-11	yes	up
FxaC_15g02800	FxaC_15g02800	PREDICTED: probable xyloglucan endotransglucosylase/hydrolase protein 33 [Fragaria vesca subsp. vesca]	0.247	-2.02034	1.8346e-13	2.3027e-11	yes	down
FxaC_6g13860	FxaC_6g13860	LEAF RUST 10 DISEASE-RESISTANCE LOCUS RECEPTOR-LIKE PROTEIN KINASE-like 1.4 isoform X4 [Rosa chinensis]	2.494	1.31869	1.93224e-13	2.41996e-11	yes	up
FxaC_3g16290	FxaC_3g16290	hypothetical protein PRUPE_7G145500 [Prunus persica]	0.484	-1.04739	2.24309e-13	2.79702e-11	yes	down
FxaC_7g25860	FxaC_7g25860	caffeoylshikimate esterase-like [Rosa chinensis]	0.143	-2.81057	2.25115e-13	2.80097e-11	yes	down
FxaC_10g13210	FxaC_10g13210	PREDICTED: cytochrome c6, chloroplastic isoform X1 [Fragaria vesca subsp. vesca]	0.471	-1.08549	2.27806e-13	2.82831e-11	yes	down
FxaC_14g35850	FxaC_14g35850	PREDICTED: ankyrin repeat-containing protein At3g12360-like isoform X1 [Fragaria vesca subsp. vesca]	4.512	2.17382	2.4273e-13	3.00707e-11	yes	up
FxaC_1g23940	FxaC_1g23940	PREDICTED: ABC transporter G family member 11-like [Fragaria vesca subsp. vesca]	2.778	1.47426	2.46666e-13	3.04923e-11	yes	up
FxaC_10g09980	FxaC_10g09980	PREDICTED: auxin-repressed 12.5 kDa protein [Fragaria vesca subsp. vesca]	3.601	1.84823	2.55422e-13	3.15066e-11	yes	up
FxaC_3g26420	FxaC_3g26420	PREDICTED: ABC transporter F family member 5-like [Fragaria vesca subsp. vesca]	2.317	1.21201	2.6251e-13	3.23113e-11	yes	up
FxaC_8g35220	FxaC_8g35220	hypothetical protein RchiOBHm_MTg0498271 (mitochondrion) [Rosa chinensis]	0.286	-1.80505	2.85939e-13	3.51195e-11	yes	down
FxaC_6g20770	FxaC_6g20770	PREDICTED: 3-hydroxy-3-methylglutaryl-coenzyme A reductase 1-like [Fragaria vesca subsp. vesca]	3.365	1.75061	2.96333e-13	3.63182e-11	yes	up
FxaC_6g42690	FxaC_6g42690	PREDICTED: beta-galactosidase 5 [Fragaria vesca subsp. vesca]	0.435	-1.20104	3.06524e-13	3.7487e-11	yes	down
FxaC_22g09640	FxaC_22g09640	PREDICTED: proline-rich receptor-like protein kinase PERK8 [Fragaria vesca subsp. vesca]	2.047	1.03381	3.18271e-13	3.87732e-11	yes	up
FxaC_22g48960	FxaC_22g48960	PREDICTED: protein ALUMINUM SENSITIVE 3 isoform X1 [Fragaria vesca subsp. vesca]	0.308	-1.70088	3.18396e-13	3.87732e-11	yes	down
FxaC_3g14310	FxaC_3g14310	PREDICTED: uncharacterized protein LOC105351056 [Fragaria vesca subsp. vesca]	0.366	-1.44944	3.2026e-13	3.89173e-11	yes	down
FxaC_27g29440	FxaC_27g29440	transcriptional activator Myb [Fragaria vesca]	2.556	1.35383	3.28919e-13	3.98849e-11	yes	up
FxaC_8g31840	FxaC_8g31840	PREDICTED: cold-regulated 413 plasma membrane protein 1 [Fragaria vesca subsp. vesca]	0.268	-1.89858	3.39766e-13	4.10896e-11	yes	down
FxaC_9g11490	FxaC_9g11490	PREDICTED: D-xylose-proton symporter-like 3, chloroplastic [Fragaria vesca subsp. vesca]	2.71	1.43849	3.90034e-13	4.68983e-11	yes	up
FxaC_1g08940	FxaC_1g08940	PREDICTED: auxin-binding protein ABP19a [Fragaria vesca subsp. vesca]	0.429	-1.22186	3.95492e-13	4.74096e-11	yes	down
FxaC_7g34390	FxaC_7g34390	PREDICTED: uncharacterized protein LOC101291486 [Fragaria vesca subsp. vesca]	0.048	-4.39195	3.95943e-13	4.74096e-11	yes	down
FxaC_7g05880	FxaC_7g05880	PREDICTED: cold-regulated 413 plasma membrane protein 1 [Fragaria vesca subsp. vesca]	0.331	-1.59508	4.05808e-13	4.84894e-11	yes	down
FxaC_26g24040	FxaC_26g24040	putative non-specific serine/threonine protein kinase [Rosa chinensis]	3.551	1.82828	4.1621e-13	4.96287e-11	yes	up
FxaC_6g08100	FxaC_6g08100	PREDICTED: uncharacterized protein LOC101303081 [Fragaria vesca subsp. vesca]	0.463	-1.11134	4.59133e-13	5.4633e-11	yes	down
FxaC_17g16230	FxaC_17g16230	PREDICTED: uncharacterized protein LOC101292707 [Fragaria vesca subsp. vesca]	0.418	-1.25948	4.71796e-13	5.58961e-11	yes	down
FxaC_13g48820	FxaC_13g48820	PREDICTED: probable voltage-gated potassium channel subunit beta [Fragaria vesca subsp. vesca]	0.477	-1.0677	4.71907e-13	5.58961e-11	yes	down
FxaC_3g13610	FxaC_3g13610	PREDICTED: aldehyde dehydrogenase family 3 member F1 [Fragaria vesca subsp. vesca]	0.358	-1.48313	4.72677e-13	5.58961e-11	yes	down
FxaC_17g29310	FxaC_17g29310	PREDICTED: glycine-rich cell wall structural protein 1.8 [Fragaria vesca subsp. vesca]	0.323	-1.63003	4.83703e-13	5.69644e-11	yes	down
FxaC_13g47880	FxaC_13g47880	PREDICTED: probable xyloglucan endotransglucosylase/hydrolase protein 23 [Fragaria vesca subsp. vesca]	0.247	-2.01907	4.8742e-13	5.72844e-11	yes	down
FxaC_23g54220	FxaC_23g54220	PREDICTED: uncharacterized protein LOC105352420 [Fragaria vesca subsp. vesca]	0.404	-1.30804	4.89994e-13	5.74689e-11	yes	down
FxaC_21g57090	FxaC_21g57090	putative ATPase, F1/V1/A1 complex, alpha/beta subunit [Helianthus annuus]	0.054	-4.21393	5.07566e-13	5.94081e-11	yes	down
FxaC_13g07600	FxaC_13g07600	PREDICTED: photosynthetic NDH subunit of lumenal location 2, chloroplastic [Fragaria vesca subsp. vesca]	0.45	-1.15144	5.13293e-13	5.99558e-11	yes	down
FxaC_20g21090	FxaC_20g21090	PREDICTED: RING-H2 finger protein ATL22-like isoform X1 [Fragaria vesca subsp. vesca]	2.525	1.33631	5.36014e-13	6.24822e-11	yes	up
FxaC_5g11660	FxaC_5g11660	PREDICTED: sugar transporter ERD6-like 7 [Fragaria vesca subsp. vesca]	0.485	-1.04372	5.41381e-13	6.29795e-11	yes	down
FxaC_7g05520	FxaC_7g05520	PREDICTED: MLP-like protein 43 [Fragaria vesca subsp. vesca]	0.37	-1.43547	5.42569e-13	6.29897e-11	yes	down
FxaC_13g09640	FxaC_13g09640	PREDICTED: uncharacterized protein At1g04910-like [Fragaria vesca subsp. vesca]	0.352	-1.50764	5.45819e-13	6.32387e-11	yes	down
FxaC_23g40690	FxaC_23g40690	protein NDL2-like isoform X1 [Rosa chinensis]	0.205	-2.28906	5.50263e-13	6.36248e-11	yes	down
FxaC_18g44040	FxaC_18g44040	PREDICTED: tubulin beta chain-like [Fragaria vesca subsp. vesca]	0.209	-2.25538	5.80645e-13	6.68676e-11	yes	down
FxaC_8g37050	FxaC_8g37050	PREDICTED: uncharacterized protein LOC101307352 [Fragaria vesca subsp. vesca]	0.104	-3.26135	5.93788e-13	6.81072e-11	yes	down
FxaC_20g38920	FxaC_20g38920	PREDICTED: protein EXORDIUM-like [Fragaria vesca subsp. vesca]	0.335	-1.57736	5.95835e-13	6.82052e-11	yes	down
FxaC_25g33420	FxaC_25g33420	PREDICTED: hydroquinone glucosyltransferase-like [Fragaria vesca subsp. vesca]	2.291	1.19587	6.31394e-13	7.18446e-11	yes	up
FxaC_10g00860	FxaC_10g00860	-	0.348	-1.52462	6.99942e-13	7.93291e-11	yes	down
FxaC_6g07830	FxaC_6g07830	PREDICTED: cold-regulated 413 plasma membrane protein 1 [Fragaria vesca subsp. vesca]	0.357	-1.48717	7.18154e-13	8.12323e-11	yes	down
FxaC_22g29950	FxaC_22g29950	PREDICTED: photosynthetic NDH subunit of subcomplex B 2, chloroplastic [Fragaria vesca subsp. vesca]	0.493	-1.01989	7.2112e-13	8.1407e-11	yes	down
FxaC_23g06100	FxaC_23g06100	PREDICTED: GDSL esterase/lipase APG [Fragaria vesca subsp. vesca]	0.492	-1.02411	7.44173e-13	8.3844e-11	yes	down
FxaC_9g05180	FxaC_9g05180	PREDICTED: non-specific lipid-transfer protein 1-like [Fragaria vesca subsp. vesca]	0.207	-2.27551	7.46096e-13	8.38955e-11	yes	down
FxaC_24g35520	FxaC_24g35520	PREDICTED: putative pentatricopeptide repeat-containing protein At4g17915 [Fragaria vesca subsp. vesca]	0.499	-1.00396	7.61485e-13	8.5458e-11	yes	down
FxaC_10g10260	FxaC_10g10260	PREDICTED: uncharacterized protein LOC101293376 [Fragaria vesca subsp. vesca]	0.379	-1.40141	7.84645e-13	8.78131e-11	yes	down
FxaC_21g20900	FxaC_21g20900	PREDICTED: glucan endo-1,3-beta-glucosidase, basic isoform-like [Fragaria vesca subsp. vesca]	2.766	1.46766	7.85539e-13	8.78131e-11	yes	up
FxaC_8g22470	FxaC_8g22470	PREDICTED: NAC transcription factor 29 [Fragaria vesca subsp. vesca]	5.487	2.45589	7.9702e-13	8.89228e-11	yes	up
FxaC_9g10970	FxaC_9g10970	PREDICTED: tubulin beta chain [Fragaria vesca subsp. vesca]	0.424	-1.23685	9.16806e-13	1.0189e-10	yes	down
FxaC_11g35440	FxaC_11g35440	PREDICTED: mitogen-activated protein kinase 3 [Fragaria vesca subsp. vesca]	2.223	1.15281	9.28488e-13	1.02871e-10	yes	up
FxaC_20g01370	FxaC_20g01370	anthocyanidin synthase [Fragaria x ananassa]	3.228	1.69055	9.47505e-13	1.04692e-10	yes	up
FxaC_7g27860	FxaC_7g27860	amino acid permease 3-like [Rosa chinensis]	3.852	1.94557	9.50645e-13	1.04837e-10	yes	up
FxaC_24g33600	FxaC_24g33600	PREDICTED: thioredoxin M-type, chloroplastic [Fragaria vesca subsp. vesca]	0.054	-4.21941	1.02936e-12	1.13299e-10	yes	down
FxaC_27g23430	FxaC_27g23430	PREDICTED: probable leucine-rich repeat receptor-like protein kinase At1g35710 [Fragaria vesca subsp. vesca]	3.762	1.91135	1.05398e-12	1.15786e-10	yes	up
FxaC_16g04790	FxaC_16g04790	PREDICTED: mediator of RNA polymerase II transcription subunit 8 [Fragaria vesca subsp. vesca]	0.018	-5.79565	1.08833e-12	1.19331e-10	yes	down
FxaC_10g14940	FxaC_10g14940	PREDICTED: calcium-transporting ATPase 12, plasma membrane-type-like [Fragaria vesca subsp. vesca]	3.041	1.60471	1.127e-12	1.23099e-10	yes	up
FxaC_23g40470	FxaC_23g40470	PREDICTED: receptor-like protein 12 isoform X2 [Fragaria vesca subsp. vesca]	3.114	1.63897	1.17764e-12	1.28385e-10	yes	up
FxaC_12g23020	FxaC_12g23020	PREDICTED: ankyrin repeat-containing protein At5g02620-like isoform X1 [Fragaria vesca subsp. vesca]	2.653	1.40743	1.22181e-12	1.32921e-10	yes	up
FxaC_19g07440	FxaC_19g07440	PREDICTED: probable pectate lyase 18 [Fragaria vesca subsp. vesca]	0.476	-1.07077	1.22389e-12	1.32921e-10	yes	down
FxaC_24g01380	FxaC_24g01380	PREDICTED: phosphoglucan phosphatase LSF1, chloroplastic [Fragaria vesca subsp. vesca]	0.469	-1.09215	1.2477e-12	1.35175e-10	yes	down
FxaC_5g22610	FxaC_5g22610	PREDICTED: aquaporin PIP2-7 [Fragaria vesca subsp. vesca]	0.471	-1.08595	1.24937e-12	1.35175e-10	yes	down
FxaC_10g47720	FxaC_10g47720	PREDICTED: uncharacterized protein LOC101294055 [Fragaria vesca subsp. vesca]	11.555	3.53046	1.29619e-12	1.39977e-10	yes	up
FxaC_16g07180	FxaC_16g07180	PREDICTED: protein CHLOROPLAST IMPORT APPARATUS 2-like isoform X2 [Fragaria vesca subsp. vesca]	2.086	1.06057	1.30134e-12	1.40267e-10	yes	up
FxaC_23g31260	FxaC_23g31260	PREDICTED: lactosylceramide 4-alpha-galactosyltransferase-like [Fragaria vesca subsp. vesca]	0.338	-1.5661	1.32352e-12	1.42391e-10	yes	down
FxaC_7g09430	FxaC_7g09430	PREDICTED: LRR receptor-like serine/threonine-protein kinase GSO2 [Fragaria vesca subsp. vesca]	8.934	3.15931	1.36718e-12	1.46811e-10	yes	up
FxaC_21g44290	FxaC_21g44290	PREDICTED: transcription repressor OFP13 [Fragaria vesca subsp. vesca]	0.183	-2.44841	1.37995e-12	1.47905e-10	yes	down
FxaC_24g14780	FxaC_24g14780	PREDICTED: probable WRKY transcription factor 33 [Fragaria vesca subsp. vesca]	2.485	1.31335	1.44045e-12	1.54101e-10	yes	up
FxaC_6g30670	FxaC_6g30670	PREDICTED: blue-light photoreceptor PHR2 [Fragaria vesca subsp. vesca]	0.31	-1.68864	1.5439e-12	1.6486e-10	yes	down
FxaC_25g37240	FxaC_25g37240	PREDICTED: uncharacterized protein LOC101294015 isoform X1 [Fragaria vesca subsp. vesca]	2.017	1.01225	1.55035e-12	1.6524e-10	yes	up
FxaC_9g39870	FxaC_9g39870	probable LRR receptor-like serine/threonine-protein kinase At1g56140 isoform X2 [Rosa chinensis]	2.699	1.43228	1.74477e-12	1.85617e-10	yes	up
FxaC_12g05560	FxaC_12g05560	PREDICTED: probable LRR receptor-like serine/threonine-protein kinase At1g06840 isoform X1 [Fragaria vesca subsp. vesca]	2.068	1.04815	1.76719e-12	1.87306e-10	yes	up
FxaC_19g39320	FxaC_19g39320	PREDICTED: receptor-like protein 2, partial [Fragaria vesca subsp. vesca]	3.923	1.97198	1.79366e-12	1.8976e-10	yes	up
FxaC_17g01630	FxaC_17g01630	PREDICTED: LOW QUALITY PROTEIN: hydroxymethylglutaryl-CoA synthase [Fragaria vesca subsp. vesca]	2.787	1.47893	1.84832e-12	1.95182e-10	yes	up
FxaC_10g13980	FxaC_10g13980	receptor-like protein EIX2 [Rosa chinensis]	3.614	1.85379	1.8578e-12	1.95822e-10	yes	up
FxaC_13g04220	FxaC_13g04220	PREDICTED: probable receptor-like protein kinase At5g39030 [Fragaria vesca subsp. vesca]	2.771	1.47017	1.87965e-12	1.9776e-10	yes	up
FxaC_22g17210	FxaC_22g17210	PREDICTED: trifunctional UDP-glucose 4,6-dehydratase/UDP-4-keto-6-deoxy-D-glucose 3,5-epimerase/UDP-4-keto-L-rhamnose-reductase RHM1-like [Fragaria vesca subsp. vesca]	0.389	-1.36219	1.89729e-12	1.9925e-10	yes	down
FxaC_15g36860	FxaC_15g36860	PREDICTED: putative protein phosphatase 2C-like protein 44 isoform X1 [Fragaria vesca subsp. vesca]	3.349	1.74364	1.97732e-12	2.07275e-10	yes	up
FxaC_28g27920	FxaC_28g27920	PREDICTED: receptor-like protein 12 [Fragaria vesca subsp. vesca]	3.826	1.93595	2.06989e-12	2.15793e-10	yes	up
FxaC_9g52030	FxaC_9g52030	PREDICTED: uncharacterized protein LOC103324604 [Prunus mume]	3.591	1.8444	2.07737e-12	2.16178e-10	yes	up
FxaC_20g04460	FxaC_20g04460	PREDICTED: uncharacterized protein LOC105351806 [Fragaria vesca subsp. vesca]	2.534	1.34151	2.11908e-12	2.19693e-10	yes	up
FxaC_24g08050	FxaC_24g08050	gamma-interferon-inducible lysosomal thiol reductase-like [Rosa chinensis]	3.42	1.77418	2.12266e-12	2.19693e-10	yes	up
FxaC_20g20150	FxaC_20g20150	PREDICTED: aspartic proteinase nepenthesin-2 [Fragaria vesca subsp. vesca]	0.184	-2.44514	2.17171e-12	2.2396e-10	yes	down
FxaC_4g29120	FxaC_4g29120	PREDICTED: lysine histidine transporter-like 8 [Fragaria vesca subsp. vesca]	2.488	1.31488	2.1834e-12	2.2476e-10	yes	up
FxaC_18g34620	FxaC_18g34620	PREDICTED: protein ABIL2-like [Fragaria vesca subsp. vesca]	6.834	2.77274	2.19666e-12	2.25719e-10	yes	up
FxaC_27g17020	FxaC_27g17020	haloacid dehalogenase-like hydrolase domain-containing protein Sgpp [Rosa chinensis]	0.431	-1.21589	2.21303e-12	2.26994e-10	yes	down
FxaC_17g54440	FxaC_17g54440	PREDICTED: leucoanthocyanidin dioxygenase-like [Fragaria vesca subsp. vesca]	5.328	2.41362	2.30705e-12	2.36215e-10	yes	up
FxaC_2g17320	FxaC_2g17320	PREDICTED: snakin-2-like [Fragaria vesca subsp. vesca]	0.153	-2.71219	2.34372e-12	2.39234e-10	yes	down
FxaC_21g57920	FxaC_21g57920	PREDICTED: probable WRKY transcription factor 33 [Fragaria vesca subsp. vesca]	2.808	1.48964	2.38566e-12	2.4296e-10	yes	up
FxaC_28g21310	FxaC_28g21310	PREDICTED: uncharacterized protein LOC101306460 [Fragaria vesca subsp. vesca]	3.398	1.76469	2.39182e-12	2.43154e-10	yes	up
FxaC_26g25620	FxaC_26g25620	PREDICTED: glyoxylate/hydroxypyruvate reductase HPR3-like [Fragaria vesca subsp. vesca]	0.457	-1.13112	2.43905e-12	2.47516e-10	yes	down
FxaC_27g46790	FxaC_27g46790	heavy metal-associated isoprenylated plant protein 39-like [Rosa chinensis]	2.069	1.04886	2.46939e-12	2.50151e-10	yes	up
FxaC_21g14270	FxaC_21g14270	PREDICTED: L-ascorbate oxidase homolog [Fragaria vesca subsp. vesca]	0.239	-2.06361	2.48575e-12	2.51364e-10	yes	down
FxaC_20g40420	FxaC_20g40420	PREDICTED: leucoanthocyanidin dioxygenase-like [Fragaria vesca subsp. vesca]	4.687	2.22878	2.53822e-12	2.56216e-10	yes	up
FxaC_21g27230	FxaC_21g27230	PREDICTED: putative leucine-rich repeat receptor-like protein kinase At2g19210 [Fragaria vesca subsp. vesca]	6.266	2.64754	2.59197e-12	2.61182e-10	yes	up
FxaC_23g24880	FxaC_23g24880	PREDICTED: aquaporin TIP1-1-like [Fragaria vesca subsp. vesca]	0.363	-1.46033	2.72401e-12	2.74004e-10	yes	down
FxaC_9g51910	FxaC_9g51910	uncharacterized protein LOC112202919 [Rosa chinensis]	2.873	1.52268	2.86127e-12	2.87307e-10	yes	up
FxaC_24g49050	FxaC_24g49050	PREDICTED: uncharacterized protein LOC101309518 [Fragaria vesca subsp. vesca]	2.573	1.3634	2.89029e-12	2.89712e-10	yes	up
FxaC_26g16860	FxaC_26g16860	PREDICTED: probable receptor-like protein kinase At5g39020 [Fragaria vesca subsp. vesca]	3.409	1.76924	2.91313e-12	2.91491e-10	yes	up
FxaC_24g29990	FxaC_24g29990	PREDICTED: remorin [Fragaria vesca subsp. vesca]	3.549	1.82746	3.01269e-12	3.00928e-10	yes	up
FxaC_21g55150	FxaC_21g55150	PREDICTED: lactosylceramide 4-alpha-galactosyltransferase-like [Fragaria vesca subsp. vesca]	0.274	-1.86661	3.12404e-12	3.11161e-10	yes	down
FxaC_22g72900	FxaC_22g72900	PREDICTED: probable WRKY transcription factor 33 [Fragaria vesca subsp. vesca]	2.299	1.20104	3.12602e-12	3.11161e-10	yes	up
FxaC_10g19720	FxaC_10g19720	PREDICTED: uncharacterized protein LOC101303689 [Fragaria vesca subsp. vesca]	2.928	1.54998	3.17896e-12	3.15824e-10	yes	up
FxaC_24g36000	FxaC_24g36000	PREDICTED: protein ASPARTIC PROTEASE IN GUARD CELL 2 [Fragaria vesca subsp. vesca]	0.107	-3.2255	3.1839e-12	3.15824e-10	yes	down
FxaC_5g35310	FxaC_5g35310	uncharacterized protein LOC112170876 [Rosa chinensis]	0.4	-1.32248	3.22276e-12	3.18575e-10	yes	down
FxaC_1g08630	FxaC_1g08630	PREDICTED: replication protein A 70 kDa DNA-binding subunit A [Fragaria vesca subsp. vesca]	0.492	-1.02466	3.30346e-12	3.25989e-10	yes	down
FxaC_8g06680	FxaC_8g06680	PREDICTED: beta-galactosidase 5 [Fragaria vesca subsp. vesca]	0.375	-1.41467	3.37833e-12	3.32803e-10	yes	down
FxaC_7g02010	FxaC_7g02010	PREDICTED: tubulin alpha chain [Fragaria vesca subsp. vesca]	0.351	-1.51052	3.40166e-12	3.34526e-10	yes	down
FxaC_14g07770	FxaC_14g07770	PREDICTED: LOW QUALITY PROTEIN: serine/threonine-protein kinase dst2 [Fragaria vesca subsp. vesca]	0.358	-1.48042	3.44742e-12	3.38445e-10	yes	down
FxaC_13g08950	FxaC_13g08950	PREDICTED: putative methylesterase 13, chloroplastic [Fragaria vesca subsp. vesca]	3.239	1.69538	3.62754e-12	3.54304e-10	yes	up
FxaC_14g08900	FxaC_14g08900	PREDICTED: phosphate transporter PHO1 homolog 1 [Fragaria vesca subsp. vesca]	3.529	1.81922	3.70429e-12	3.61185e-10	yes	up
FxaC_5g04150	FxaC_5g04150	PREDICTED: probable plastid-lipid-associated protein 8, chloroplastic [Fragaria vesca subsp. vesca]	0.47	-1.08799	3.86287e-12	3.75367e-10	yes	down
FxaC_7g06920	FxaC_7g06920	PREDICTED: transcription factor RADIALIS-like [Fragaria vesca subsp. vesca]	3.838	1.94037	3.90679e-12	3.77712e-10	yes	up
FxaC_23g37940	FxaC_23g37940	PREDICTED: uncharacterized protein LOC101304116 [Fragaria vesca subsp. vesca]	14.733	3.88095	4.04349e-12	3.89612e-10	yes	up
FxaC_27g26660	FxaC_27g26660	cyclic nucleotide-gated ion channel 1-like isoform X1 [Rosa chinensis]	2.264	1.17885	4.07719e-12	3.92198e-10	yes	up
FxaC_21g11500	FxaC_21g11500	PREDICTED: uncharacterized protein LOC101293803 [Fragaria vesca subsp. vesca]	0.328	-1.60938	4.15105e-12	3.98633e-10	yes	down
FxaC_26g06430	FxaC_26g06430	putative multi antimicrobial extrusion protein [Rosa chinensis]	2.562	1.35723	4.18453e-12	4.01176e-10	yes	up
FxaC_23g00160	FxaC_23g00160	PREDICTED: trifunctional UDP-glucose 4,6-dehydratase/UDP-4-keto-6-deoxy-D-glucose 3,5-epimerase/UDP-4-keto-L-rhamnose-reductase RHM1-like [Fragaria vesca subsp. vesca]	0.397	-1.33283	4.2595e-12	4.0768e-10	yes	down
FxaC_7g02070	FxaC_7g02070	PREDICTED: UDP-glycosyltransferase 74F2-like [Fragaria vesca subsp. vesca]	0.32	-1.64401	4.32555e-12	4.13311e-10	yes	down
FxaC_27g05730	FxaC_27g05730	PREDICTED: LOW QUALITY PROTEIN: protein ZINC INDUCED FACILITATOR-LIKE 1-like [Fragaria vesca subsp. vesca]	0.339	-1.56068	4.37498e-12	4.17337e-10	yes	down
FxaC_3g06740	FxaC_3g06740	PREDICTED: zinc finger CCCH domain-containing protein 20 [Fragaria vesca subsp. vesca]	3.943	1.9792	4.43457e-12	4.22317e-10	yes	up
FxaC_8g37310	FxaC_8g37310	PREDICTED: UDP-glycosyltransferase 74E1-like [Fragaria vesca subsp. vesca]	0.377	-1.40804	4.76983e-12	4.52738e-10	yes	down
FxaC_15g00450	FxaC_15g00450	PREDICTED: uncharacterized protein LOC101290756 [Fragaria vesca subsp. vesca]	3.311	1.7273	4.81035e-12	4.55828e-10	yes	up
FxaC_9g43540	FxaC_9g43540	PREDICTED: protein LIGHT-DEPENDENT SHORT HYPOCOTYLS 4-like [Fragaria vesca subsp. vesca]	5.006	2.32359	4.88843e-12	4.62462e-10	yes	up
FxaC_21g66890	FxaC_21g66890	PREDICTED: gamma-interferon-inducible lysosomal thiol reductase-like isoform X2 [Fragaria vesca subsp. vesca]	2.821	1.49635	4.9908e-12	4.71367e-10	yes	up
FxaC_6g07800	FxaC_6g07800	PREDICTED: cold-regulated 413 plasma membrane protein 1 [Fragaria vesca subsp. vesca]	0.33	-1.59819	5.15345e-12	4.85927e-10	yes	down
FxaC_6g40780	FxaC_6g40780	PREDICTED: receptor-like protein kinase 5 [Fragaria vesca subsp. vesca]	4.984	2.31718	5.1917e-12	4.88728e-10	yes	up
FxaC_19g11020	FxaC_19g11020	PREDICTED: cytochrome P450 78A9-like [Fragaria vesca subsp. vesca]	2.531	1.33981	5.84639e-12	5.48554e-10	yes	up
FxaC_24g07880	FxaC_24g07880	hypothetical protein CISIN_1g033509mg [Citrus sinensis]	0.369	-1.43751	6.08777e-12	5.69336e-10	yes	down
FxaC_10g16120	FxaC_10g16120	G-type lectin S-receptor-like serine/threonine-protein kinase At1g67520 [Rosa chinensis]	0.398	-1.32851	6.11238e-12	5.70705e-10	yes	down
FxaC_12g09230	FxaC_12g09230	PREDICTED: ribulose bisphosphate carboxylase/oxygenase activase, chloroplastic-like [Fragaria vesca subsp. vesca]	2.429	1.28054	6.32772e-12	5.88889e-10	yes	up
FxaC_26g28510	FxaC_26g28510	receptor like protein 6-like [Rosa chinensis]	2.951	1.56111	6.39073e-12	5.93788e-10	yes	up
FxaC_21g69690	FxaC_21g69690	PREDICTED: cytochrome P450 714C2-like [Fragaria vesca subsp. vesca]	5.273	2.39875	6.60884e-12	6.13058e-10	yes	up
FxaC_11g15050	FxaC_11g15050	PREDICTED: BAHD acyltransferase At5g47980-like [Fragaria vesca subsp. vesca]	3.435	1.7802	7.0265e-12	6.49696e-10	yes	up
FxaC_16g01970	FxaC_16g01970	PREDICTED: lysM domain receptor-like kinase 4 [Fragaria vesca subsp. vesca]	2.758	1.4637	7.12178e-12	6.56385e-10	yes	up
FxaC_14g03560	FxaC_14g03560	PREDICTED: galactinol synthase 1 [Fragaria vesca subsp. vesca]	2.835	1.50356	7.62477e-12	7.01613e-10	yes	up
FxaC_20g29650	FxaC_20g29650	PREDICTED: uncharacterized transporter YBR287W-like isoform X1 [Fragaria vesca subsp. vesca]	0.313	-1.67708	7.71041e-12	7.08355e-10	yes	down
FxaC_28g15450	FxaC_28g15450	PREDICTED: uncharacterized protein LOC101309494 [Fragaria vesca subsp. vesca]	0.477	-1.06884	7.78193e-12	7.1378e-10	yes	down
FxaC_21g11960	FxaC_21g11960	PREDICTED: uncharacterized protein LOC101305098 [Fragaria vesca subsp. vesca]	2.39	1.25684	7.83957e-12	7.17917e-10	yes	up
FxaC_9g01390	FxaC_9g01390	PREDICTED: probable acyl-activating enzyme 18, peroxisomal [Fragaria vesca subsp. vesca]	2.115	1.08033	8.23384e-12	7.52817e-10	yes	up
FxaC_22g04140	FxaC_22g04140	PREDICTED: carbonic anhydrase 2 [Fragaria vesca subsp. vesca]	0.456	-1.13205	8.33638e-12	7.60977e-10	yes	down
FxaC_6g04890	FxaC_6g04890	Recname: Full=Cinnamate beta-D-glucosyltransferase; Altname: Full=UDP-glucose:cinnamate glucosyltransferase; Short=FaGT2 >gi|51705411|gb|AAU09443.1| UDP-glucose glucosyltransferase [Fragaria x ananassa]	0.087	-3.5214	8.50712e-12	7.75326e-10	yes	down
FxaC_22g37920	FxaC_22g37920	PREDICTED: remorin [Fragaria vesca subsp. vesca]	4.601	2.20188	8.93356e-12	8.09039e-10	yes	up
FxaC_12g15700	FxaC_12g15700	PREDICTED: pleiotropic drug resistance protein 2-like [Fragaria vesca subsp. vesca]	2.176	1.12151	9.14019e-12	8.26444e-10	yes	up
FxaC_6g19470	FxaC_6g19470	PREDICTED: NAC transcription factor 29 [Fragaria vesca subsp. vesca]	4.52	2.17622	9.2461e-12	8.34701e-10	yes	up
FxaC_10g00020	FxaC_10g00020	PREDICTED: uncharacterized protein LOC18596615 [Theobroma cacao]	2.426	1.27834	9.52009e-12	8.58083e-10	yes	up
FxaC_11g01540	FxaC_11g01540	PREDICTED: polyphenol oxidase, chloroplastic-like [Fragaria vesca subsp. vesca]	7.551	2.91674	1.01952e-11	9.16051e-10	yes	up
FxaC_24g33970	FxaC_24g33970	PREDICTED: thioredoxin M-type, chloroplastic [Fragaria vesca subsp. vesca]	0.117	-3.09479	1.08213e-11	9.70775e-10	yes	down
FxaC_24g52710	FxaC_24g52710	PREDICTED: xyloglucan endotransglucosylase/hydrolase protein 9 [Fragaria vesca subsp. vesca]	0.165	-2.60043	1.14962e-11	1.02649e-09	yes	down
FxaC_23g10400	FxaC_23g10400	PREDICTED: pyrophosphate-energized vacuolar membrane proton pump-like [Fragaria vesca subsp. vesca]	0.459	-1.12284	1.16672e-11	1.04015e-09	yes	down
FxaC_17g06310	FxaC_17g06310	PREDICTED: uncharacterized protein LOC101308375 [Fragaria vesca subsp. vesca]	2.189	1.13047	1.17256e-11	1.04372e-09	yes	up
FxaC_19g16620	FxaC_19g16620	PREDICTED: beta-amyrin 28-oxidase-like [Fragaria vesca subsp. vesca]	359.634	8.49039	1.19347e-11	1.06068e-09	yes	up
FxaC_14g12080	FxaC_14g12080	PREDICTED: uncharacterized protein LOC101313310 isoform X1 [Fragaria vesca subsp. vesca]	2.276	1.18643	1.19653e-11	1.06176e-09	yes	up
FxaC_7g13900	FxaC_7g13900	PREDICTED: vegetative cell wall protein gp1 [Prunus mume]	0.306	-1.70676	1.32616e-11	1.16953e-09	yes	down
FxaC_7g13630	FxaC_7g13630	PREDICTED: uncharacterized protein LOC101295772 isoform X1 [Fragaria vesca subsp. vesca]	2.4	1.26281	1.34727e-11	1.1845e-09	yes	up
FxaC_11g14570	FxaC_11g14570	probable LRR receptor-like serine/threonine-protein kinase At1g56140 isoform X2 [Rosa chinensis]	2.537	1.34302	1.35644e-11	1.19073e-09	yes	up
FxaC_10g02870	FxaC_10g02870	PREDICTED: beta-galactosidase 8-like [Fragaria vesca subsp. vesca]	0.091	-3.45678	1.41437e-11	1.23969e-09	yes	down
FxaC_9g51830	FxaC_9g51830	hypothetical protein PRUPE_4G032800 [Prunus persica]	4.106	2.0378	1.51098e-11	1.32234e-09	yes	up
FxaC_23g03810	FxaC_23g03810	PREDICTED: auxin-binding protein ABP19a [Fragaria vesca subsp. vesca]	0.255	-1.97229	1.52462e-11	1.33224e-09	yes	down
FxaC_6g11420	FxaC_6g11420	PREDICTED: GATA transcription factor 5-like [Fragaria vesca subsp. vesca]	2.889	1.53068	1.54482e-11	1.34783e-09	yes	up
FxaC_27g23380	FxaC_27g23380	putative non-specific serine/threonine protein kinase [Rosa chinensis]	3.641	1.86449	1.58461e-11	1.38044e-09	yes	up
FxaC_2g27070	FxaC_2g27070	PREDICTED: protein TRANSPARENT TESTA 12-like [Fragaria vesca subsp. vesca]	0.444	-1.17173	1.61279e-11	1.40286e-09	yes	down
FxaC_27g44410	FxaC_27g44410	PREDICTED: CDGSH iron-sulfur domain-containing protein NEET [Fragaria vesca subsp. vesca]	3.471	1.79552	1.63701e-11	1.42176e-09	yes	up
FxaC_15g12680	FxaC_15g12680	PREDICTED: uncharacterized protein LOC101290763 [Fragaria vesca subsp. vesca]	0.403	-1.30996	1.65481e-11	1.43287e-09	yes	down
FxaC_28g22300	FxaC_28g22300	cyclic nucleotide-gated ion channel 1-like [Rosa chinensis]	2.076	1.05393	1.66548e-11	1.43993e-09	yes	up
FxaC_6g00250	FxaC_6g00250	PREDICTED: probable BOI-related E3 ubiquitin-protein ligase 3 [Fragaria vesca subsp. vesca]	6.222	2.6373	1.69908e-11	1.46677e-09	yes	up
FxaC_12g01330	FxaC_12g01330	PREDICTED: tyrosine-sulfated glycopeptide receptor 1-like [Fragaria vesca subsp. vesca]	2.276	1.1866	1.72402e-11	1.48383e-09	yes	up
FxaC_21g59450	FxaC_21g59450	probable LRR receptor-like serine/threonine-protein kinase At1g06840 [Rosa chinensis]	2.987	1.57858	1.72815e-11	1.48515e-09	yes	up
FxaC_9g43650	FxaC_9g43650	PREDICTED: putative wall-associated receptor kinase-like 16 [Fragaria vesca subsp. vesca]	2.65	1.40596	1.75663e-11	1.5054e-09	yes	up
FxaC_10g33360	FxaC_10g33360	hypothetical protein CUMW_006240 [Citrus unshiu]	2.083	1.0585	1.75698e-11	1.5054e-09	yes	up
FxaC_2g25070	FxaC_2g25070	PREDICTED: probable xyloglucan endotransglucosylase/hydrolase protein 6 [Fragaria vesca subsp. vesca]	0.364	-1.45887	1.77134e-11	1.51544e-09	yes	down
FxaC_21g33860	FxaC_21g33860	PREDICTED: protein ASPARTIC PROTEASE IN GUARD CELL 2 [Fragaria vesca subsp. vesca]	0.335	-1.57781	1.77454e-11	1.51591e-09	yes	down
FxaC_14g08860	FxaC_14g08860	PREDICTED: putative phospholipid-transporting ATPase 9 [Fragaria vesca subsp. vesca]	3.364	1.75006	1.80295e-11	1.53788e-09	yes	up
FxaC_4g16290	FxaC_4g16290	PREDICTED: uncharacterized protein LOC101300664 [Fragaria vesca subsp. vesca]	0.435	-1.20237	1.85429e-11	1.57697e-09	yes	down
FxaC_18g39240	FxaC_18g39240	PREDICTED: centromere protein X isoform X1 [Fragaria vesca subsp. vesca]	2.102	1.07194	1.8719e-11	1.58723e-09	yes	up
FxaC_14g17330	FxaC_14g17330	PREDICTED: phosphate transporter PHO1 homolog 3-like [Fragaria vesca subsp. vesca]	6.289	2.6528	1.96436e-11	1.66317e-09	yes	up
FxaC_11g07640	FxaC_11g07640	photosystem I reaction center subunit psaK, chloroplastic [Rosa chinensis]	0.498	-1.00648	1.97214e-11	1.66729e-09	yes	down
FxaC_25g31880	FxaC_25g31880	PREDICTED: dehydration-responsive protein RD22-like [Fragaria vesca subsp. vesca]	2.367	1.24323	1.98354e-11	1.67445e-09	yes	up
FxaC_9g40600	FxaC_9g40600	PREDICTED: glyceraldehyde-3-phosphate dehydrogenase GAPCP1, chloroplastic [Fragaria vesca subsp. vesca]	2.274	1.1855	2.03749e-11	1.71746e-09	yes	up
FxaC_25g46730	FxaC_25g46730	PREDICTED: LRR receptor-like serine/threonine-protein kinase FLS2 [Fragaria vesca subsp. vesca]	2.498	1.32103	2.04756e-11	1.7226e-09	yes	up
FxaC_9g46390	FxaC_9g46390	PREDICTED: protein CHUP1, chloroplastic [Fragaria vesca subsp. vesca]	0.331	-1.5965	2.0496e-11	1.7226e-09	yes	down
FxaC_12g40760	FxaC_12g40760	PREDICTED: probable ubiquitin-conjugating enzyme E2 24 [Fragaria vesca subsp. vesca]	2.149	1.10356	2.05282e-11	1.72278e-09	yes	up
FxaC_22g04850	FxaC_22g04850	PREDICTED: metalloendoproteinase 1-like [Fragaria vesca subsp. vesca]	12.686	3.6652	2.08012e-11	1.74313e-09	yes	up
FxaC_27g27520	FxaC_27g27520	PREDICTED: uncharacterized protein LOC101306460 [Fragaria vesca subsp. vesca]	4.842	2.27553	2.08886e-11	1.74789e-09	yes	up
FxaC_21g20310	FxaC_21g20310	PREDICTED: wall-associated receptor kinase-like 1 [Fragaria vesca subsp. vesca]	2.694	1.42948	2.17302e-11	1.81566e-09	yes	up
FxaC_18g41920	FxaC_18g41920	PREDICTED: probable WRKY transcription factor 53 [Fragaria vesca subsp. vesca]	3.456	1.78913	2.223e-11	1.85042e-09	yes	up
FxaC_24g26000	FxaC_24g26000	hypothetical protein PanWU01x14_282010, partial [Parasponia andersonii]	2.654	1.40842	2.22432e-11	1.85042e-09	yes	up
FxaC_10g02530	FxaC_10g02530	PREDICTED: polyphenol oxidase, chloroplastic-like [Fragaria vesca subsp. vesca]	4.835	2.27352	2.31106e-11	1.91423e-09	yes	up
FxaC_14g12810	FxaC_14g12810	PREDICTED: probable pectate lyase 5 [Fragaria vesca subsp. vesca]	0.285	-1.81316	2.36877e-11	1.9592e-09	yes	down
FxaC_22g25150	FxaC_22g25150	PREDICTED: uncharacterized protein LOC105352529 [Fragaria vesca subsp. vesca]	0.2	-2.32266	2.4106e-11	1.99092e-09	yes	down
FxaC_27g43070	FxaC_27g43070	PREDICTED: putative receptor-like protein kinase At3g47110 [Fragaria vesca subsp. vesca]	3.579	1.83943	2.4576e-11	2.02389e-09	yes	up
FxaC_27g26030	FxaC_27g26030	PREDICTED: hydroquinone glucosyltransferase-like [Fragaria vesca subsp. vesca]	2.122	1.08528	2.47039e-11	2.0315e-09	yes	up
FxaC_15g11140	FxaC_15g11140	PREDICTED: uncharacterized protein LOC101308084 [Fragaria vesca subsp. vesca]	0.285	-1.8092	2.56122e-11	2.10016e-09	yes	down
FxaC_25g34990	FxaC_25g34990	PREDICTED: cytochrome P450 78A9-like [Fragaria vesca subsp. vesca]	6.508	2.70217	2.58221e-11	2.11434e-09	yes	up
FxaC_1g23780	FxaC_1g23780	PREDICTED: peroxidase 17-like [Fragaria vesca subsp. vesca]	3.073	1.61987	2.61095e-11	2.13482e-09	yes	up
FxaC_28g01460	FxaC_28g01460	PREDICTED: growth-regulating factor 3 [Fragaria vesca subsp. vesca]	2.946	1.55876	2.8898e-11	2.35274e-09	yes	up
FxaC_12g42020	FxaC_12g42020	PREDICTED: protein CHUP1, chloroplastic [Fragaria vesca subsp. vesca]	0.499	-1.00257	3.00021e-11	2.43916e-09	yes	down
FxaC_6g20700	FxaC_6g20700	PREDICTED: 3-hydroxy-3-methylglutaryl-coenzyme A reductase 1-like [Fragaria vesca subsp. vesca]	2.973	1.57214	3.01125e-11	2.44467e-09	yes	up
FxaC_11g42980	FxaC_11g42980	PREDICTED: probable LRR receptor-like serine/threonine-protein kinase At1g06840 isoform X1 [Fragaria vesca subsp. vesca]	2.272	1.18425	3.04488e-11	2.46676e-09	yes	up
FxaC_13g08180	FxaC_13g08180	PREDICTED: remorin isoform X2 [Fragaria vesca subsp. vesca]	0.37	-1.43306	3.04709e-11	2.46676e-09	yes	down
FxaC_23g50330	FxaC_23g50330	PREDICTED: tubulin alpha-2 chain-like [Fragaria vesca subsp. vesca]	0.331	-1.5941	3.10071e-11	2.50662e-09	yes	down
FxaC_24g39890	FxaC_24g39890	PREDICTED: uncharacterized protein LOC105352529 [Fragaria vesca subsp. vesca]	0.249	-2.0034	3.33752e-11	2.69046e-09	yes	down
FxaC_21g66870	FxaC_21g66870	PREDICTED: gamma-interferon-inducible lysosomal thiol reductase-like isoform X2 [Fragaria vesca subsp. vesca]	2.526	1.33704	3.35453e-11	2.70037e-09	yes	up
FxaC_7g27720	FxaC_7g27720	PREDICTED: probable L-ascorbate peroxidase 6, chloroplastic isoform X2 [Fragaria vesca subsp. vesca]	2.635	1.39778	3.36606e-11	2.70585e-09	yes	up
FxaC_14g38150	FxaC_14g38150	PREDICTED: probable pectate lyase 8 [Fragaria vesca subsp. vesca]	0.331	-1.59397	3.50503e-11	2.81361e-09	yes	down
FxaC_27g42040	FxaC_27g42040	PREDICTED: methylesterase 17 [Fragaria vesca subsp. vesca]	3.733	1.90017	3.53477e-11	2.83351e-09	yes	up
FxaC_8g37590	FxaC_8g37590	PREDICTED: pathogenesis-related protein 1-like [Fragaria vesca subsp. vesca]	0.439	-1.187	3.54722e-11	2.83951e-09	yes	down
FxaC_25g08500	FxaC_25g08500	PREDICTED: hippocampus abundant transcript-like protein 1 isoform X2 [Fragaria vesca subsp. vesca]	0.217	-2.20516	3.71042e-11	2.96601e-09	yes	down
FxaC_9g42840	FxaC_9g42840	PREDICTED: myb-like protein P [Fragaria vesca subsp. vesca]	3.023	1.59578	3.79914e-11	3.02616e-09	yes	up
FxaC_4g12590	FxaC_4g12590	PREDICTED: uncharacterized protein LOC101295653 [Fragaria vesca subsp. vesca]	8.239	3.04255	3.80275e-11	3.02616e-09	yes	up
FxaC_13g10550	FxaC_13g10550	PREDICTED: phosphate transporter PHO1 homolog 1 [Fragaria vesca subsp. vesca]	2.944	1.55774	3.80682e-11	3.02616e-09	yes	up
FxaC_10g48990	FxaC_10g48990	PREDICTED: linoleate 13S-lipoxygenase 2-1, chloroplastic-like [Fragaria vesca subsp. vesca]	0.432	-1.21249	3.8411e-11	3.04917e-09	yes	down
FxaC_2g22890	FxaC_2g22890	phosphatase 2C (PP2C)-like protein [Corchorus olitorius]	2.319	1.21357	4.14823e-11	3.28387e-09	yes	up
FxaC_27g23390	FxaC_27g23390	PREDICTED: probable leucine-rich repeat receptor-like protein kinase At1g35710, partial [Fragaria vesca subsp. vesca]	4.351	2.12142	4.25307e-11	3.36222e-09	yes	up
FxaC_21g46910	FxaC_21g46910	PREDICTED: caffeic acid 3-O-methyltransferase [Fragaria vesca subsp. vesca]	3.538	1.82306	4.59751e-11	3.61951e-09	yes	up
FxaC_21g07750	FxaC_21g07750	PREDICTED: uncharacterized protein LOC101314873 isoform X2 [Fragaria vesca subsp. vesca]	3.358	1.74781	4.68289e-11	3.67158e-09	yes	up
FxaC_6g45310	FxaC_6g45310	PREDICTED: random slug protein 5 [Fragaria vesca subsp. vesca]	2.106	1.07481	4.89558e-11	3.82978e-09	yes	up
FxaC_10g05910	FxaC_10g05910	PREDICTED: cytochrome b561 and DOMON domain-containing protein At4g17280 [Fragaria vesca subsp. vesca]	2.051	1.036	4.89806e-11	3.82978e-09	yes	up
FxaC_14g19500	FxaC_14g19500	PREDICTED: major allergen Pru ar 1-like [Fragaria vesca subsp. vesca]	2.307	1.20622	5.12144e-11	3.99898e-09	yes	up
FxaC_9g51150	FxaC_9g51150	PREDICTED: uncharacterized protein LOC101303095 [Fragaria vesca subsp. vesca]	2.583	1.3693	5.19802e-11	4.04773e-09	yes	up
FxaC_21g12830	FxaC_21g12830	PREDICTED: protein ASPARTIC PROTEASE IN GUARD CELL 2-like [Fragaria vesca subsp. vesca]	2.091	1.0645	5.25293e-11	4.07939e-09	yes	up
FxaC_7g41500	FxaC_7g41500	PREDICTED: beta-galactosidase 5 [Fragaria vesca subsp. vesca]	0.431	-1.2135	5.2697e-11	4.08687e-09	yes	down
FxaC_5g42880	FxaC_5g42880	PREDICTED: rac-like GTP-binding protein 5 [Fragaria vesca subsp. vesca]	0.365	-1.45263	5.27698e-11	4.08698e-09	yes	down
FxaC_23g11100	FxaC_23g11100	metal transporter Nramp6 isoform X1 [Rosa chinensis]	0.393	-1.34783	5.42499e-11	4.19594e-09	yes	down
FxaC_14g03040	FxaC_14g03040	PREDICTED: probable xyloglucan endotransglucosylase/hydrolase protein 33 [Fragaria vesca subsp. vesca]	0.308	-1.70113	5.45582e-11	4.21409e-09	yes	down
FxaC_27g02010	FxaC_27g02010	PREDICTED: serine carboxypeptidase-like 40 [Fragaria vesca subsp. vesca]	0.264	-1.92116	5.46416e-11	4.21484e-09	yes	down
FxaC_6g42350	FxaC_6g42350	transcription factor MYB28-like [Fragaria vesca]	0.02	-5.65482	5.55444e-11	4.27296e-09	yes	down
FxaC_20g03560	FxaC_20g03560	PREDICTED: triacylglycerol lipase 2-like [Fragaria vesca subsp. vesca]	3.026	1.59744	5.83168e-11	4.47421e-09	yes	up
FxaC_20g39680	FxaC_20g39680	PREDICTED: sugar transport protein 5 [Fragaria vesca subsp. vesca]	2.415	1.27194	5.85589e-11	4.48677e-09	yes	up
FxaC_6g00260	FxaC_6g00260	PREDICTED: heavy metal-associated isoprenylated plant protein 26 [Fragaria vesca subsp. vesca]	2.15	1.10454	5.92728e-11	4.5354e-09	yes	up
FxaC_17g09180	FxaC_17g09180	PREDICTED: leucine-rich repeat receptor-like serine/threonine/tyrosine-protein kinase SOBIR1 [Fragaria vesca subsp. vesca]	2.86	1.51589	6.11946e-11	4.66997e-09	yes	up
FxaC_15g05180	FxaC_15g05180	-	2.626	1.39288	6.15808e-11	4.68694e-09	yes	up
FxaC_21g48260	FxaC_21g48260	PREDICTED: RING finger and CHY zinc finger domain-containing protein 1 [Fragaria vesca subsp. vesca]	0.263	-1.92903	6.31428e-11	4.79944e-09	yes	down
FxaC_3g27930	FxaC_3g27930	PREDICTED: titin-like [Fragaria vesca subsp. vesca]	4.5	2.16985	6.76384e-11	5.12753e-09	yes	up
FxaC_24g41250	FxaC_24g41250	PREDICTED: putative leucine-rich repeat receptor-like protein kinase At2g19210 [Fragaria vesca subsp. vesca]	5.141	2.362	6.80938e-11	5.15522e-09	yes	up
FxaC_21g19980	FxaC_21g19980	PREDICTED: trifunctional UDP-glucose 4,6-dehydratase/UDP-4-keto-6-deoxy-D-glucose 3,5-epimerase/UDP-4-keto-L-rhamnose-reductase RHM1-like [Fragaria vesca subsp. vesca]	0.411	-1.28135	6.89391e-11	5.21232e-09	yes	down
FxaC_25g02420	FxaC_25g02420	PREDICTED: serine carboxypeptidase-like 40 [Fragaria vesca subsp. vesca]	0.27	-1.88713	7.08132e-11	5.33288e-09	yes	down
FxaC_2g33840	FxaC_2g33840	PREDICTED: uncharacterized protein LOC101295653 [Fragaria vesca subsp. vesca]	7.855	2.97368	7.2205e-11	5.43055e-09	yes	up
FxaC_20g10600	FxaC_20g10600	PREDICTED: metal tolerance protein 1 [Fragaria vesca subsp. vesca]	0.429	-1.2208	7.63025e-11	5.7312e-09	yes	down
FxaC_22g31480	FxaC_22g31480	PREDICTED: thioredoxin M-type, chloroplastic [Fragaria vesca subsp. vesca]	0.055	-4.18211	7.87831e-11	5.90976e-09	yes	down
FxaC_5g40940	FxaC_5g40940	PREDICTED: tubulin alpha chain [Fragaria vesca subsp. vesca]	0.338	-1.56534	7.99341e-11	5.98826e-09	yes	down
FxaC_12g38940	FxaC_12g38940	PREDICTED: beta-amyrin 28-oxidase-like [Fragaria vesca subsp. vesca]	4.036	2.013	8.20872e-11	6.13107e-09	yes	up
FxaC_28g14950	FxaC_28g14950	PREDICTED: protein LHY-like [Fragaria vesca subsp. vesca]	2.637	1.39892	8.21619e-11	6.13107e-09	yes	up
FxaC_13g14100	FxaC_13g14100	PREDICTED: UDP-glycosyltransferase 74E1-like [Fragaria vesca subsp. vesca]	0.473	-1.08028	8.24992e-11	6.14823e-09	yes	down
FxaC_3g29840	FxaC_3g29840	PREDICTED: uncharacterized protein LOC101295653 [Fragaria vesca subsp. vesca]	13.654	3.77127	8.6482e-11	6.43667e-09	yes	up
FxaC_16g07950	FxaC_16g07950	PREDICTED: uncharacterized protein At4g30180-like [Fragaria vesca subsp. vesca]	0.232	-2.10585	8.70921e-11	6.47366e-09	yes	down
FxaC_10g05700	FxaC_10g05700	PREDICTED: mavicyanin-like [Fragaria vesca subsp. vesca]	0.31	-1.68974	9.03878e-11	6.70992e-09	yes	down
FxaC_10g38120	FxaC_10g38120	cytosolic ascorbate peroxidase [Fragaria x ananassa]	2.047	1.03361	9.32027e-11	6.90098e-09	yes	up
FxaC_12g15510	FxaC_12g15510	PREDICTED: MLP-like protein 31 [Fragaria vesca subsp. vesca]	0.274	-1.87037	9.65434e-11	7.13266e-09	yes	down
FxaC_20g04490	FxaC_20g04490	PREDICTED: uncharacterized protein LOC101297936 [Fragaria vesca subsp. vesca]	4.925	2.3001	9.65809e-11	7.13266e-09	yes	up
FxaC_20g35010	FxaC_20g35010	PREDICTED: chlorophyll a-b binding protein CP24 10A, chloroplastic [Fragaria vesca subsp. vesca]	0.471	-1.08565	9.91906e-11	7.30653e-09	yes	down
FxaC_20g01490	FxaC_20g01490	PREDICTED: phospholipase D beta 1-like [Fragaria vesca subsp. vesca]	4.044	2.01569	1.06174e-10	7.81091e-09	yes	up
FxaC_17g42030	FxaC_17g42030	PREDICTED: potassium channel AKT2/3 [Fragaria vesca subsp. vesca]	2.86	1.51616	1.07821e-10	7.9045e-09	yes	up
FxaC_14g26390	FxaC_14g26390	PREDICTED: adenosylhomocysteinase [Fragaria vesca subsp. vesca]	0.495	-1.01504	1.07861e-10	7.9045e-09	yes	down
FxaC_3g15780	FxaC_3g15780	PREDICTED: calcium uniporter protein 2, mitochondrial [Fragaria vesca subsp. vesca]	0.38	-1.39452	1.09528e-10	8.00326e-09	yes	down
FxaC_2g19800	FxaC_2g19800	probable serine/threonine-protein kinase PBL11 [Rosa chinensis]	2.285	1.1922	1.09628e-10	8.00326e-09	yes	up
FxaC_2g25410	FxaC_2g25410	2-alkenal reductase (NADP(+)-dependent)-like [Rosa chinensis]	7.057	2.8191	1.14319e-10	8.33508e-09	yes	up
FxaC_12g44010	FxaC_12g44010	PREDICTED: uncharacterized protein LOC101293074 [Fragaria vesca subsp. vesca]	0.219	-2.19325	1.1814e-10	8.5809e-09	yes	down
FxaC_8g30300	FxaC_8g30300	PREDICTED: transcription factor bHLH63 [Fragaria vesca subsp. vesca]	0.465	-1.10618	1.23463e-10	8.93349e-09	yes	down
FxaC_21g43390	FxaC_21g43390	PREDICTED: syntaxin-121-like [Fragaria vesca subsp. vesca]	3.764	1.91223	1.26025e-10	9.09589e-09	yes	up
FxaC_27g43990	FxaC_27g43990	PREDICTED: protein EXORDIUM-like 3 [Fragaria vesca subsp. vesca]	0.3	-1.73481	1.30264e-10	9.38997e-09	yes	down
FxaC_15g04960	FxaC_15g04960	PREDICTED: probable sulfate transporter 3.3 [Fragaria vesca subsp. vesca]	2.336	1.22385	1.36913e-10	9.83211e-09	yes	up
FxaC_9g03120	FxaC_9g03120	PREDICTED: linoleate 13S-lipoxygenase 2-1, chloroplastic-like [Fragaria vesca subsp. vesca]	0.196	-2.35458	1.39821e-10	1.00158e-08	yes	down
FxaC_3g39780	FxaC_3g39780	PREDICTED: photosynthetic NDH subunit of subcomplex B 2, chloroplastic [Fragaria vesca subsp. vesca]	0.417	-1.26225	1.4791e-10	1.0582e-08	yes	down
FxaC_3g20890	FxaC_3g20890	PREDICTED: tubulin alpha-3 chain [Fragaria vesca subsp. vesca]	0.334	-1.58004	1.51439e-10	1.0821e-08	yes	down
FxaC_14g05070	FxaC_14g05070	PREDICTED: probable sulfate transporter 3.3 [Fragaria vesca subsp. vesca]	2.059	1.04211	1.54775e-10	1.10456e-08	yes	up
FxaC_21g25880	FxaC_21g25880	PREDICTED: nuclear transcription factor Y subunit A-3 [Fragaria vesca subsp. vesca]	2.375	1.24782	1.55646e-10	1.10939e-08	yes	up
FxaC_26g03180	FxaC_26g03180	PREDICTED: uncharacterized protein LOC101293238 [Fragaria vesca subsp. vesca]	2.103	1.07212	1.58544e-10	1.12747e-08	yes	up
FxaC_6g02770	FxaC_6g02770	PREDICTED: serine carboxypeptidase-like 18 [Fragaria vesca subsp. vesca]	0.051	-4.2854	1.58577e-10	1.12747e-08	yes	down
FxaC_8g37170	FxaC_8g37170	PREDICTED: serine carboxypeptidase-like 17 [Fragaria vesca subsp. vesca]	0.034	-4.86671	1.59381e-10	1.13113e-08	yes	down
FxaC_21g60690	FxaC_21g60690	PREDICTED: hydrophobic protein RCI2A [Fragaria vesca subsp. vesca]	0.383	-1.38639	1.59487e-10	1.13113e-08	yes	down
FxaC_27g28410	FxaC_27g28410	PREDICTED: hydroquinone glucosyltransferase-like [Fragaria vesca subsp. vesca]	2.151	1.10472	1.60935e-10	1.13999e-08	yes	up
FxaC_21g65300	FxaC_21g65300	probable serine/threonine-protein kinase PBL7 [Rosa chinensis]	0.393	-1.34736	1.70964e-10	1.20655e-08	yes	down
FxaC_8g20140	FxaC_8g20140	-	2.32	1.21429	1.79869e-10	1.26783e-08	yes	up
FxaC_2g03140	FxaC_2g03140	PREDICTED: probable RNA-dependent RNA polymerase 5 isoform X2 [Fragaria vesca subsp. vesca]	5.019	2.32745	1.84146e-10	1.29638e-08	yes	up
FxaC_6g14480	FxaC_6g14480	PREDICTED: laccase-14-like isoform X1 [Fragaria vesca subsp. vesca]	0.014	-6.15975	1.8818e-10	1.32316e-08	yes	down
FxaC_9g42960	FxaC_9g42960	cyclic nucleotide-gated ion channel 1-like [Rosa chinensis]	2.968	1.5693	1.89601e-10	1.32988e-08	yes	up
FxaC_7g42980	FxaC_7g42980	PREDICTED: uncharacterized protein LOC101311938 [Fragaria vesca subsp. vesca]	2.933	1.55226	1.90327e-10	1.33334e-08	yes	up
FxaC_1g18000	FxaC_1g18000	PREDICTED: uncharacterized protein LOC101293717 [Fragaria vesca subsp. vesca]	0.382	-1.38981	1.90778e-10	1.33486e-08	yes	down
FxaC_4g32810	FxaC_4g32810	PREDICTED: putative transcription factor bHLH041 [Fragaria vesca subsp. vesca]	5.217	2.38318	1.92168e-10	1.34295e-08	yes	up
FxaC_1g02480	FxaC_1g02480	hypothetical protein RchiOBHm_Chr2g0089511 [Rosa chinensis]	0.154	-2.69707	1.95609e-10	1.36533e-08	yes	down
FxaC_14g00680	FxaC_14g00680	PREDICTED: uncharacterized protein LOC101290756 [Fragaria vesca subsp. vesca]	3.515	1.81372	1.98397e-10	1.3831e-08	yes	up
FxaC_13g25560	FxaC_13g25560	PREDICTED: LOW QUALITY PROTEIN: CAS1 domain-containing protein 1 [Fragaria vesca subsp. vesca]	0.498	-1.00633	2.07432e-10	1.44258e-08	yes	down
FxaC_12g42720	FxaC_12g42720	probable LRR receptor-like serine/threonine-protein kinase At3g47570 [Rosa chinensis]	7.515	2.90969	2.12606e-10	1.47676e-08	yes	up
FxaC_27g24280	FxaC_27g24280	PREDICTED: BURP domain-containing protein 3-like [Fragaria vesca subsp. vesca]	2.323	1.21574	2.1365e-10	1.48222e-08	yes	up
FxaC_2g07770	FxaC_2g07770	-	0.169	-2.569	2.16524e-10	1.50033e-08	yes	down
FxaC_23g42620	FxaC_23g42620	PREDICTED: U-box domain-containing protein 9-like [Fragaria vesca subsp. vesca]	3.289	1.71762	2.17432e-10	1.5048e-08	yes	up
FxaC_23g11260	FxaC_23g11260	PREDICTED: protein ASPARTIC PROTEASE IN GUARD CELL 2 [Fragaria vesca subsp. vesca]	0.038	-4.70513	2.23132e-10	1.54238e-08	yes	down
FxaC_13g52400	FxaC_13g52400	PREDICTED: WAT1-related protein At4g08300-like [Fragaria vesca subsp. vesca]	4.204	2.07165	2.27607e-10	1.57142e-08	yes	up
FxaC_14g08160	FxaC_14g08160	PREDICTED: uncharacterized protein At1g04910-like [Fragaria vesca subsp. vesca]	0.37	-1.43522	2.28131e-10	1.57314e-08	yes	down
FxaC_20g04470	FxaC_20g04470	PREDICTED: uncharacterized protein LOC105351806 [Fragaria vesca subsp. vesca]	2.58	1.36753	2.2999e-10	1.58215e-08	yes	up
FxaC_15g03540	FxaC_15g03540	PREDICTED: protein PLANT CADMIUM RESISTANCE 2-like [Fragaria vesca subsp. vesca]	0.407	-1.29605	2.3188e-10	1.59238e-08	yes	down
FxaC_21g05210	FxaC_21g05210	PREDICTED: carbonic anhydrase 2 [Fragaria vesca subsp. vesca]	0.481	-1.05526	2.32033e-10	1.59238e-08	yes	down
FxaC_13g05680	FxaC_13g05680	PREDICTED: probable sulfate transporter 3.3 [Fragaria vesca subsp. vesca]	2.158	1.10939	2.33869e-10	1.60305e-08	yes	up
FxaC_20g10190	FxaC_20g10190	PREDICTED: trihelix transcription factor GTL1 isoform X1 [Fragaria vesca subsp. vesca]	0.492	-1.02262	2.48791e-10	1.7033e-08	yes	down
FxaC_8g13300	FxaC_8g13300	PREDICTED: uncharacterized protein LOC101291486 [Fragaria vesca subsp. vesca]	0.092	-3.44958	2.51689e-10	1.72108e-08	yes	down
FxaC_8g30360	FxaC_8g30360	PREDICTED: transcription factor RADIALIS-like [Fragaria vesca subsp. vesca]	4.251	2.08764	2.68577e-10	1.83218e-08	yes	up
FxaC_15g02290	FxaC_15g02290	PREDICTED: UDP-glycosyltransferase 74B1-like [Fragaria vesca subsp. vesca]	0.309	-1.69415	2.70407e-10	1.84046e-08	yes	down
FxaC_22g73210	FxaC_22g73210	PREDICTED: abscisic acid receptor PYL4 [Fragaria vesca subsp. vesca]	0.133	-2.90723	2.7326e-10	1.85749e-08	yes	down
FxaC_11g13330	FxaC_11g13330	PREDICTED: probable leucine-rich repeat receptor-like protein kinase At1g35710 [Fragaria vesca subsp. vesca]	2.845	1.50824	2.76696e-10	1.87861e-08	yes	up
FxaC_14g22800	FxaC_14g22800	PREDICTED: glutamine synthetase leaf isozyme, chloroplastic [Fragaria vesca subsp. vesca]	0.437	-1.19498	3.21838e-10	2.17735e-08	yes	down
FxaC_25g33350	FxaC_25g33350	PREDICTED: protein trichome birefringence-like 25 [Fragaria vesca subsp. vesca]	0.278	-1.84619	3.31357e-10	2.23647e-08	yes	down
FxaC_3g31650	FxaC_3g31650	hypothetical protein RchiOBHm_Chr2g0123801 [Rosa chinensis]	2.771	1.47063	3.3238e-10	2.24072e-08	yes	up
FxaC_11g00020	FxaC_11g00020	PREDICTED: uncharacterized protein LOC101312912 [Fragaria vesca subsp. vesca]	2.528	1.3382	3.42016e-10	2.30298e-08	yes	up
FxaC_7g05540	FxaC_7g05540	uncharacterized protein LOC112170876 [Rosa chinensis]	0.277	-1.8525	3.46057e-10	2.32745e-08	yes	down
FxaC_20g04450	FxaC_20g04450	PREDICTED: triacylglycerol lipase 2-like [Fragaria vesca subsp. vesca]	2.037	1.02617	3.50611e-10	2.3553e-08	yes	up
FxaC_21g37200	FxaC_21g37200	PREDICTED: uncharacterized protein LOC101306071 [Fragaria vesca subsp. vesca]	0.401	-1.31971	3.5308e-10	2.36911e-08	yes	down
FxaC_15g03280	FxaC_15g03280	PREDICTED: galactinol synthase 1 [Fragaria vesca subsp. vesca]	2.385	1.25419	3.71088e-10	2.48412e-08	yes	up
FxaC_7g16920	FxaC_7g16920	PREDICTED: probable methyltransferase PMT3 [Fragaria vesca subsp. vesca]	0.409	-1.29014	3.72013e-10	2.4874e-08	yes	down
FxaC_21g67030	FxaC_21g67030	protein NDL2-like isoform X1 [Rosa chinensis]	0.264	-1.92263	3.76731e-10	2.51561e-08	yes	down
FxaC_24g00690	FxaC_24g00690	PREDICTED: peroxidase 63 [Fragaria vesca subsp. vesca]	0.337	-1.57104	3.77111e-10	2.51561e-08	yes	down
FxaC_9g51950	FxaC_9g51950	PREDICTED: uncharacterized protein LOC101312912 [Fragaria vesca subsp. vesca]	2.123	1.08605	3.83249e-10	2.55358e-08	yes	up
FxaC_4g15530	FxaC_4g15530	PREDICTED: transcription factor TGA4-like isoform X1 [Fragaria vesca subsp. vesca]	4.002	2.00072	3.98747e-10	2.65375e-08	yes	up
FxaC_27g52180	FxaC_27g52180	PREDICTED: 1-aminocyclopropane-1-carboxylate oxidase 5 [Fragaria vesca subsp. vesca]	0.447	-1.16045	4.00407e-10	2.66171e-08	yes	down
FxaC_21g52490	FxaC_21g52490	PREDICTED: uncharacterized protein LOC101305773 [Fragaria vesca subsp. vesca]	0.462	-1.11499	4.10077e-10	2.71653e-08	yes	down
FxaC_1g02380	FxaC_1g02380	PREDICTED: uncharacterized protein LOC101303940 [Fragaria vesca subsp. vesca]	2.14	1.09765	4.13599e-10	2.73669e-08	yes	up
FxaC_24g07850	FxaC_24g07850	-	3.887	1.95879	4.26347e-10	2.81778e-08	yes	up
FxaC_22g08340	FxaC_22g08340	PREDICTED: receptor-like protein kinase FERONIA isoform X1 [Fragaria vesca subsp. vesca]	2.022	1.01599	4.58106e-10	3.0207e-08	yes	up
FxaC_11g03360	FxaC_11g03360	PREDICTED: putative UDP-rhamnose:rhamnosyltransferase 1 [Fragaria vesca subsp. vesca]	0.332	-1.5898	4.62803e-10	3.04466e-08	yes	down
FxaC_7g02090	FxaC_7g02090	UDP-glucuronosyl/UDP-glucosyltransferase [Corchorus olitorius]	0.351	-1.50926	4.65631e-10	3.05975e-08	yes	down
FxaC_7g10330	FxaC_7g10330	PREDICTED: putative laccase-9 [Fragaria vesca subsp. vesca]	0.016	-5.96565	4.92753e-10	3.22686e-08	yes	down
FxaC_11g11270	FxaC_11g11270	PREDICTED: probable arabinosyltransferase ARAD1 [Fragaria vesca subsp. vesca]	0.446	-1.16341	5.06217e-10	3.31124e-08	yes	down
FxaC_23g01510	FxaC_23g01510	PREDICTED: pumilio homolog 5 [Fragaria vesca subsp. vesca]	2.447	1.29076	5.18443e-10	3.38348e-08	yes	up
FxaC_20g16540	FxaC_20g16540	PREDICTED: uncharacterized protein LOC101310711 [Fragaria vesca subsp. vesca]	0.458	-1.12791	5.20255e-10	3.39041e-08	yes	down
FxaC_27g42140	FxaC_27g42140	PREDICTED: probable non-specific lipid-transfer protein AKCS9 [Fragaria vesca subsp. vesca]	2.967	1.56893	5.2069e-10	3.39041e-08	yes	up
FxaC_2g22400	FxaC_2g22400	PREDICTED: small RNA degrading nuclease 1 [Fragaria vesca subsp. vesca]	2.412	1.27041	5.24648e-10	3.4123e-08	yes	up
FxaC_12g29290	FxaC_12g29290	PREDICTED: uncharacterized protein LOC101303689 [Fragaria vesca subsp. vesca]	2.553	1.35193	5.52529e-10	3.58956e-08	yes	up
FxaC_27g01130	FxaC_27g01130	PREDICTED: cytochrome P450 94C1-like [Fragaria vesca subsp. vesca]	3.279	1.71329	5.57752e-10	3.61938e-08	yes	up
FxaC_9g44680	FxaC_9g44680	putative wall-associated receptor kinase-like 16 [Rosa chinensis]	3.028	1.59852	5.73674e-10	3.71849e-08	yes	up
FxaC_23g61590	FxaC_23g61590	uncharacterized protein LOC112184868 [Rosa chinensis]	0.284	-1.81626	5.77556e-10	3.73941e-08	yes	down
FxaC_25g60030	FxaC_25g60030	ferric reduction oxidase 4-like [Rosa chinensis]	12.093	3.59615	5.81077e-10	3.75796e-08	yes	up
FxaC_5g01730	FxaC_5g01730	PREDICTED: uncharacterized protein LOC101291486 [Fragaria vesca subsp. vesca]	0.142	-2.81172	5.82418e-10	3.76238e-08	yes	down
FxaC_23g32880	FxaC_23g32880	PREDICTED: probable WRKY transcription factor 33 [Fragaria vesca subsp. vesca]	2.421	1.27582	5.9134e-10	3.81532e-08	yes	up
FxaC_27g17490	FxaC_27g17490	PREDICTED: uncharacterized protein LOC101307154 [Fragaria vesca subsp. vesca]	0.481	-1.05504	5.91946e-10	3.81532e-08	yes	down
FxaC_16g29700	FxaC_16g29700	PREDICTED: IAA-amino acid hydrolase ILR1-like 1 [Fragaria vesca subsp. vesca]	5.22	2.38393	5.94812e-10	3.82948e-08	yes	up
FxaC_6g23470	FxaC_6g23470	TMV resistance protein N-like [Rosa chinensis]	3.331	1.73584	6.1888e-10	3.97996e-08	yes	up
FxaC_12g46780	FxaC_12g46780	ENT4 [Arabidopsis thaliana]	0.368	-1.44271	6.47035e-10	4.14704e-08	yes	down
FxaC_12g41240	FxaC_12g41240	Recname: Full=Auxin-repressed 12.5 kDa protein >gi|22573|emb|CAA36676.1| 12.5 kDa protein [Fragaria x ananassa]	5.074	2.3431	6.5633e-10	4.20191e-08	yes	up
FxaC_25g39660	FxaC_25g39660	PREDICTED: uncharacterized protein LOC101296040 [Fragaria vesca subsp. vesca]	0.253	-1.98095	6.61351e-10	4.22932e-08	yes	down
FxaC_24g19760	FxaC_24g19760	PREDICTED: protein ALUMINUM SENSITIVE 3 isoform X1 [Fragaria vesca subsp. vesca]	0.287	-1.80235	6.65322e-10	4.24997e-08	yes	down
FxaC_16g23140	FxaC_16g23140	PREDICTED: protein STRICTOSidINE SYNTHASE-LIKE 10-like [Fragaria vesca subsp. vesca]	0.379	-1.39876	6.74066e-10	4.30102e-08	yes	down
FxaC_9g05670	FxaC_9g05670	PREDICTED: probable LRR receptor-like serine/threonine-protein kinase At1g06840 isoform X1 [Fragaria vesca subsp. vesca]	2.208	1.14292	6.87581e-10	4.3775e-08	yes	up
FxaC_17g50250	FxaC_17g50250	PREDICTED: protein ECERIFERUM 1-like [Fragaria vesca subsp. vesca]	0.5	-1.00021	6.954e-10	4.42235e-08	yes	down
FxaC_21g64500	FxaC_21g64500	PREDICTED: uncharacterized protein LOC104435162 [Eucalyptus grandis]	0.393	-1.3491	7.33784e-10	4.65611e-08	yes	down
FxaC_22g69380	FxaC_22g69380	PREDICTED: uncharacterized protein LOC104435162 [Eucalyptus grandis]	0.465	-1.10505	7.4093e-10	4.69105e-08	yes	down
FxaC_3g18780	FxaC_3g18780	PREDICTED: classical arabinogalactan protein 4 [Fragaria vesca subsp. vesca]	0.246	-2.02501	7.46389e-10	4.7204e-08	yes	down
FxaC_13g18760	FxaC_13g18760	PREDICTED: cysteine-rich receptor-like protein kinase 2 [Fragaria vesca subsp. vesca]	2.134	1.09382	8.05518e-10	5.08311e-08	yes	up
FxaC_9g10730	FxaC_9g10730	PREDICTED: mitochondrial uncoupling protein 2 [Fragaria vesca subsp. vesca]	0.388	-1.36411	8.28179e-10	5.21461e-08	yes	down
FxaC_23g45710	FxaC_23g45710	Lysine histidine transporter 1, partial [Cajanus cajan]	2.811	1.49116	8.55845e-10	5.37108e-08	yes	up
FxaC_26g41760	FxaC_26g41760	PREDICTED: nuclear transcription factor Y subunit A-4-like isoform X1 [Fragaria vesca subsp. vesca]	3.468	1.79422	8.70526e-10	5.45519e-08	yes	up
FxaC_2g31290	FxaC_2g31290	PREDICTED: uncharacterized protein LOC101298253 [Fragaria vesca subsp. vesca]	0.471	-1.08677	8.71154e-10	5.45519e-08	yes	down
FxaC_3g11780	FxaC_3g11780	chitinase [Fragaria x ananassa]	6.339	2.66431	8.72911e-10	5.46022e-08	yes	up
FxaC_18g23410	FxaC_18g23410	PREDICTED: putative invertase inhibitor [Fragaria vesca subsp. vesca]	0.072	-3.79927	9.00322e-10	5.62554e-08	yes	down
FxaC_21g20660	FxaC_21g20660	PREDICTED: receptor-like protein kinase [Fragaria vesca subsp. vesca]	2.276	1.18641	9.09659e-10	5.67768e-08	yes	up
FxaC_4g23990	FxaC_4g23990	PREDICTED: probable serine/threonine-protein kinase At1g01540 [Fragaria vesca subsp. vesca]	0.351	-1.51246	9.21311e-10	5.73165e-08	yes	down
FxaC_25g21390	FxaC_25g21390	PREDICTED: LOW QUALITY PROTEIN: chitinase 1-like [Ziziphus jujuba]	2.891	1.53158	9.44912e-10	5.85938e-08	yes	up
FxaC_25g32850	FxaC_25g32850	PREDICTED: LOW QUALITY PROTEIN: chitinase 1-like [Ziziphus jujuba]	2.891	1.53158	9.44912e-10	5.85938e-08	yes	up
FxaC_4g32230	FxaC_4g32230	PREDICTED: nuclear transcription factor Y subunit A-3-like isoform X1 [Fragaria vesca subsp. vesca]	2.317	1.21234	9.49282e-10	5.8801e-08	yes	up
FxaC_13g05440	FxaC_13g05440	PREDICTED: LOW QUALITY PROTEIN: MLP-like protein 34 [Fragaria vesca subsp. vesca]	19.075	4.25363	9.60711e-10	5.94447e-08	yes	up
FxaC_28g02350	FxaC_28g02350	PREDICTED: cyclic nucleotide-gated ion channel 1-like [Fragaria vesca subsp. vesca]	2.133	1.0928	9.96154e-10	6.15047e-08	yes	up
FxaC_22g41810	FxaC_22g41810	PREDICTED: syntaxin-121 [Fragaria vesca subsp. vesca]	3.611	1.85239	9.99914e-10	6.16628e-08	yes	up
FxaC_22g29420	FxaC_22g29420	PREDICTED: protein ASPARTIC PROTEASE IN GUARD CELL 2 [Fragaria vesca subsp. vesca]	0.405	-1.30322	1.00128e-09	6.16628e-08	yes	down
FxaC_13g07440	FxaC_13g07440	PREDICTED: cyclic dof factor 3 [Fragaria vesca subsp. vesca]	2.674	1.41922	1.00195e-09	6.16628e-08	yes	up
FxaC_23g29590	FxaC_23g29590	PREDICTED: transcription factor bHLH157-like [Fragaria vesca subsp. vesca]	2.108	1.07581	1.00804e-09	6.19713e-08	yes	up
FxaC_7g32890	FxaC_7g32890	PREDICTED: (S)-coclaurine N-methyltransferase [Fragaria vesca subsp. vesca]	0.495	-1.01484	1.02678e-09	6.29879e-08	yes	down
FxaC_11g13660	FxaC_11g13660	PREDICTED: metal tolerance protein 10 [Fragaria vesca subsp. vesca]	0.37	-1.43562	1.05401e-09	6.45891e-08	yes	down
FxaC_17g09170	FxaC_17g09170	PREDICTED: centromere protein X isoform X1 [Fragaria vesca subsp. vesca]	2.258	1.17527	1.06273e-09	6.5054e-08	yes	up
FxaC_8g10790	FxaC_8g10790	PREDICTED: probably inactive leucine-rich repeat receptor-like protein kinase At2g25790 [Fragaria vesca subsp. vesca]	2.491	1.31654	1.09705e-09	6.70116e-08	yes	up
FxaC_11g17320	FxaC_11g17320	PREDICTED: TPR repeat-containing thioredoxin TTL1 [Fragaria vesca subsp. vesca]	0.312	-1.68147	1.1185e-09	6.81764e-08	yes	down
FxaC_27g46980	FxaC_27g46980	PREDICTED: UDP-glycosyltransferase 88A1-like [Fragaria vesca subsp. vesca]	3.153	1.65658	1.12497e-09	6.84976e-08	yes	up
FxaC_11g05770	FxaC_11g05770	PREDICTED: glutamate receptor 2.7-like [Fragaria vesca subsp. vesca]	3.711	1.89188	1.16537e-09	7.08068e-08	yes	up
FxaC_25g45760	FxaC_25g45760	PREDICTED: expansin-A10 [Fragaria vesca subsp. vesca]	0.483	-1.05035	1.16706e-09	7.08342e-08	yes	down
FxaC_10g15310	FxaC_10g15310	PREDICTED: zingipain-2-like [Fragaria vesca subsp. vesca]	9.357	3.22612	1.20317e-09	7.29485e-08	yes	up
FxaC_11g18210	FxaC_11g18210	PREDICTED: uncharacterized protein LOC101306310 [Fragaria vesca subsp. vesca]	0.108	-3.20761	1.22049e-09	7.39207e-08	yes	down
FxaC_17g55130	FxaC_17g55130	PREDICTED: TMV resistance protein N-like isoform X1 [Fragaria vesca subsp. vesca]	2.906	1.5392	1.23207e-09	7.45428e-08	yes	up
FxaC_21g27860	FxaC_21g27860	PREDICTED: transcription factor bHLH87 [Fragaria vesca subsp. vesca]	0.287	-1.80149	1.23497e-09	7.45614e-08	yes	down
FxaC_15g33050	FxaC_15g33050	PREDICTED: probable WRKY transcription factor 11 [Fragaria vesca subsp. vesca]	2.525	1.33638	1.23803e-09	7.46665e-08	yes	up
FxaC_20g00180	FxaC_20g00180	PREDICTED: probable transaldolase [Fragaria vesca subsp. vesca]	0.458	-1.1267	1.25202e-09	7.54311e-08	yes	down
FxaC_1g30000	FxaC_1g30000	NADH-plastoquinone oxidoreductase subunit K protein (chloroplast) [Ficus sp. Moore 315]	0.06	-4.04934	1.25527e-09	7.55473e-08	yes	down
FxaC_15g11730	FxaC_15g11730	PREDICTED: G2/mitotic-specific cyclin S13-7-like [Fragaria vesca subsp. vesca]	4.56	2.18891	1.28385e-09	7.71048e-08	yes	up
FxaC_14g08230	FxaC_14g08230	PREDICTED: uncharacterized protein At1g04910-like [Fragaria vesca subsp. vesca]	0.286	-1.80648	1.2969e-09	7.78069e-08	yes	down
FxaC_17g00050	FxaC_17g00050	PREDICTED: monocopper oxidase-like protein SKU5 [Fragaria vesca subsp. vesca]	0.349	-1.51791	1.30416e-09	7.8161e-08	yes	down
FxaC_10g04450	FxaC_10g04450	PREDICTED: probable xyloglucan endotransglucosylase/hydrolase protein 8 [Fragaria vesca subsp. vesca]	0.224	-2.15805	1.32376e-09	7.92527e-08	yes	down
FxaC_9g10020	FxaC_9g10020	PREDICTED: probable NAD(P)H dehydrogenase (quinone) FQR1-like 3 [Fragaria vesca subsp. vesca]	0.487	-1.03887	1.34818e-09	8.04621e-08	yes	down
FxaC_22g00560	FxaC_22g00560	PREDICTED: uncharacterized protein LOC101296410 [Fragaria vesca subsp. vesca]	0.162	-2.62516	1.37721e-09	8.21091e-08	yes	down
FxaC_27g00740	FxaC_27g00740	PREDICTED: zinc finger A20 and AN1 domain-containing stress-associated protein 5 [Fragaria vesca subsp. vesca]	2.129	1.09007	1.37887e-09	8.21225e-08	yes	up
FxaC_21g70590	FxaC_21g70590	putative transcription factor C3H family [Rosa chinensis]	0.057	-4.12329	1.38161e-09	8.22003e-08	yes	down
FxaC_3g03820	FxaC_3g03820	PREDICTED: zinc finger Ran-binding domain-containing protein 2 [Fragaria vesca subsp. vesca]	0.016	-5.93646	1.38932e-09	8.2573e-08	yes	down
FxaC_28g15610	FxaC_28g15610	PREDICTED: protein IN2-1 homolog B-like [Fragaria vesca subsp. vesca]	0.065	-3.9429	1.40609e-09	8.34831e-08	yes	down
FxaC_14g23920	FxaC_14g23920	PREDICTED: uncharacterized protein LOC101305932 [Fragaria vesca subsp. vesca]	0.03	-5.07454	1.43396e-09	8.50492e-08	yes	down
FxaC_23g45220	FxaC_23g45220	PREDICTED: receptor-like protein 12 [Fragaria vesca subsp. vesca]	2.08	1.05632	1.46106e-09	8.63884e-08	yes	up
FxaC_11g08950	FxaC_11g08950	PREDICTED: protein LIGHT-DEPENDENT SHORT HYPOCOTYLS 4-like [Fragaria vesca subsp. vesca]	6.63	2.72906	1.49025e-09	8.79324e-08	yes	up
FxaC_2g13920	FxaC_2g13920	PREDICTED: protein STRICTOSidINE SYNTHASE-LIKE 4-like [Fragaria vesca subsp. vesca]	0.441	-1.18002	1.61457e-09	9.46346e-08	yes	down
FxaC_25g49730	FxaC_25g49730	PREDICTED: CDGSH iron-sulfur domain-containing protein NEET [Fragaria vesca subsp. vesca]	3.142	1.65155	1.66391e-09	9.71772e-08	yes	up
FxaC_7g38980	FxaC_7g38980	transcription factor MYB28-like [Fragaria vesca]	0.023	-5.46958	1.67474e-09	9.77102e-08	yes	down
FxaC_21g38030	FxaC_21g38030	PREDICTED: remorin [Fragaria vesca subsp. vesca]	4.306	2.10627	1.68629e-09	9.82096e-08	yes	up
FxaC_7g15360	FxaC_7g15360	PREDICTED: 3-hydroxy-3-methylglutaryl-coenzyme A reductase 1-like [Fragaria vesca subsp. vesca]	3.833	1.93831	1.69136e-09	9.83791e-08	yes	up
FxaC_2g44270	FxaC_2g44270	PREDICTED: photosynthetic NDH subunit of subcomplex B 2, chloroplastic [Fragaria vesca subsp. vesca]	0.384	-1.38236	1.70504e-09	9.90739e-08	yes	down
FxaC_13g23300	FxaC_13g23300	PREDICTED: obtusifoliol 14-alpha demethylase [Fragaria vesca subsp. vesca]	0.467	-1.0997	1.7078e-09	9.91339e-08	yes	down
FxaC_1g06650	FxaC_1g06650	PREDICTED: zinc finger CCCH domain-containing protein 20 [Fragaria vesca subsp. vesca]	2.254	1.17247	1.71086e-09	9.91476e-08	yes	up
FxaC_2g08100	FxaC_2g08100	PREDICTED: zinc finger Ran-binding domain-containing protein 2 [Fragaria vesca subsp. vesca]	0.004	-7.91745	1.7115e-09	9.91476e-08	yes	down
FxaC_17g12870	FxaC_17g12870	PREDICTED: UPF0481 protein At3g47200-like [Fragaria vesca subsp. vesca]	2.81	1.4907	1.71503e-09	9.92515e-08	yes	up
FxaC_27g05010	FxaC_27g05010	PREDICTED: probable receptor-like protein kinase At1g67000 isoform X2 [Fragaria vesca subsp. vesca]	2.175	1.12081	1.72796e-09	9.97982e-08	yes	up
FxaC_21g50850	FxaC_21g50850	PREDICTED: protein ALUMINUM SENSITIVE 3 isoform X1 [Fragaria vesca subsp. vesca]	0.342	-1.54906	1.81122e-09	1.04396e-07	yes	down
FxaC_4g31810	FxaC_4g31810	hypothetical protein GOBAR_AA33812 [Gossypium barbadense]	0.439	-1.18824	1.81483e-09	1.04499e-07	yes	down
FxaC_12g31420	FxaC_12g31420	PREDICTED: TPR repeat-containing thioredoxin TTL1 [Fragaria vesca subsp. vesca]	0.382	-1.38837	1.83979e-09	1.0583e-07	yes	down
FxaC_18g43880	FxaC_18g43880	PREDICTED: transcription factor GLABRA 3 [Fragaria vesca subsp. vesca]	0.435	-1.19932	1.84681e-09	1.06127e-07	yes	down
FxaC_28g04330	FxaC_28g04330	PREDICTED: protein TRANSPARENT TESTA 12-like [Fragaria vesca subsp. vesca]	2.215	1.14716	1.85625e-09	1.06562e-07	yes	up
FxaC_22g22380	FxaC_22g22380	PREDICTED: midasin isoform X1 [Fragaria vesca subsp. vesca]	2.278	1.18756	1.88359e-09	1.08024e-07	yes	up
FxaC_6g38590	FxaC_6g38590	PREDICTED: uncharacterized protein LOC101291486 [Fragaria vesca subsp. vesca]	0.137	-2.86741	1.90128e-09	1.08929e-07	yes	down
FxaC_12g46450	FxaC_12g46450	PREDICTED: uncharacterized protein LOC101303095 [Fragaria vesca subsp. vesca]	2.736	1.45225	1.91963e-09	1.09727e-07	yes	up
FxaC_7g41930	FxaC_7g41930	dihydroflavonol 4-reductase [Fragaria x ananassa]	2.161	1.11171	1.92096e-09	1.09727e-07	yes	up
FxaC_2g05170	FxaC_2g05170	PREDICTED: zinc finger CCCH domain-containing protein 20 [Fragaria vesca subsp. vesca]	3.532	1.82048	1.96094e-09	1.11787e-07	yes	up
FxaC_13g12210	FxaC_13g12210	PREDICTED: uncharacterized protein LOC101308084 [Fragaria vesca subsp. vesca]	0.203	-2.29939	1.97705e-09	1.12594e-07	yes	down
FxaC_1g32150	FxaC_1g32150	PREDICTED: uncharacterized protein LOC101298068 [Fragaria vesca subsp. vesca]	2.341	1.22715	1.99512e-09	1.13384e-07	yes	up
FxaC_24g35350	FxaC_24g35350	PREDICTED: peroxidase P7-like [Fragaria vesca subsp. vesca]	0.375	-1.41367	2.00389e-09	1.1367e-07	yes	down
FxaC_2g08800	FxaC_2g08800	PREDICTED: uncharacterized protein LOC101292045 [Fragaria vesca subsp. vesca]	2.87	1.52113	2.05803e-09	1.1651e-07	yes	up
FxaC_5g42740	FxaC_5g42740	PREDICTED: amino acid permease 4-like [Fragaria vesca subsp. vesca]	5.136	2.36064	2.08578e-09	1.17848e-07	yes	up
FxaC_10g26600	FxaC_10g26600	PREDICTED: probable leucine-rich repeat receptor-like protein kinase At5g49770 [Fragaria vesca subsp. vesca]	4.536	2.18157	2.1129e-09	1.19262e-07	yes	up
FxaC_12g47760	FxaC_12g47760	PREDICTED: LOW QUALITY PROTEIN: cysteine-rich receptor-like protein kinase 10 [Fragaria vesca subsp. vesca]	3.491	1.80355	2.11913e-09	1.19496e-07	yes	up
FxaC_11g44180	FxaC_11g44180	PREDICTED: uncharacterized protein LOC101294055 [Fragaria vesca subsp. vesca]	8.271	3.04798	2.13147e-09	1.20074e-07	yes	up
FxaC_9g30570	FxaC_9g30570	PREDICTED: DNA polymerase I A, chloroplastic/mitochondrial [Fragaria vesca subsp. vesca]	2.044	1.03149	2.21115e-09	1.2444e-07	yes	up
FxaC_27g52000	FxaC_27g52000	PREDICTED: growth-regulating factor 3 [Fragaria vesca subsp. vesca]	3.709	1.8912	2.21617e-09	1.24599e-07	yes	up
FxaC_26g32140	FxaC_26g32140	ATP synthase beta subunit, partial (chloroplast) [Spergula fallax]	0.052	-4.25782	2.22375e-09	1.24903e-07	yes	down
FxaC_9g32310	FxaC_9g32310	PREDICTED: chlorophyll a-b binding protein 13, chloroplastic [Fragaria vesca subsp. vesca]	0.366	-1.44847	2.26806e-09	1.27267e-07	yes	down
FxaC_16g11730	FxaC_16g11730	PREDICTED: crocetin glucosyltransferase 3 [Fragaria vesca subsp. vesca]	0.474	-1.0783	2.28322e-09	1.27992e-07	yes	down
FxaC_20g05070	FxaC_20g05070	PREDICTED: mitogen-activated protein kinase kinase kinase 7-like [Fragaria vesca subsp. vesca]	0.186	-2.42912	2.33401e-09	1.30584e-07	yes	down
FxaC_22g51270	FxaC_22g51270	proline-rich receptor-like protein kinase PERK2 [Rosa chinensis]	0.194	-2.36472	2.34304e-09	1.30961e-07	yes	down
FxaC_5g27840	FxaC_5g27840	LEAF RUST 10 DISEASE-RESISTANCE LOCUS RECEPTOR-LIKE PROTEIN KINASE-like 1.4 isoform X4 [Rosa chinensis]	2.294	1.19773	2.36665e-09	1.32151e-07	yes	up
FxaC_4g22420	FxaC_4g22420	PREDICTED: protein RADIALIS-like 4 [Fragaria vesca subsp. vesca]	2.786	1.47819	2.37802e-09	1.32657e-07	yes	up
FxaC_6g35770	FxaC_6g35770	PREDICTED: uncharacterized protein LOC101299256 [Fragaria vesca subsp. vesca]	2.063	1.04469	2.41325e-09	1.3436e-07	yes	up
FxaC_17g50840	FxaC_17g50840	PREDICTED: mechanosensitive ion channel protein 2, chloroplastic-like [Fragaria vesca subsp. vesca]	0.402	-1.31487	2.41977e-09	1.34592e-07	yes	down
FxaC_28g28110	FxaC_28g28110	PREDICTED: receptor-like protein kinase 2 [Fragaria vesca subsp. vesca]	2.853	1.51269	2.43845e-09	1.355e-07	yes	up
FxaC_13g00900	FxaC_13g00900	PREDICTED: uncharacterized protein LOC101295807 [Fragaria vesca subsp. vesca]	3.961	1.9857	2.48128e-09	1.37746e-07	yes	up
FxaC_4g02290	FxaC_4g02290	PREDICTED: nucleolin [Fragaria vesca subsp. vesca]	0.204	-2.29151	2.51105e-09	1.39129e-07	yes	down
FxaC_21g45310	FxaC_21g45310	PREDICTED: (-)-alpha-pinene synthase-like [Fragaria vesca subsp. vesca]	0.469	-1.09286	2.5197e-09	1.39371e-07	yes	down
FxaC_21g69450	FxaC_21g69450	PREDICTED: probable receptor-like protein kinase At1g67000 [Fragaria vesca subsp. vesca]	2.149	1.10389	2.52272e-09	1.39371e-07	yes	up
FxaC_8g12230	FxaC_8g12230	PREDICTED: uncharacterized protein LOC107420512 [Ziziphus jujuba]	3.099	1.63177	2.53032e-09	1.39656e-07	yes	up
FxaC_15g22340	FxaC_15g22340	PREDICTED: sugar transport protein 13-like [Fragaria vesca subsp. vesca]	2.098	1.06884	2.59403e-09	1.43034e-07	yes	up
FxaC_8g31340	FxaC_8g31340	PREDICTED: very-long-chain enoyl-CoA reductase-like [Fragaria vesca subsp. vesca]	0.043	-4.54069	2.62751e-09	1.44601e-07	yes	down
FxaC_11g05090	FxaC_11g05090	PREDICTED: probable LRR receptor-like serine/threonine-protein kinase At3g47570 [Fragaria vesca subsp. vesca]	6.45	2.68935	2.69582e-09	1.48076e-07	yes	up
FxaC_2g02570	FxaC_2g02570	PREDICTED: zinc finger CCCH domain-containing protein 20 [Fragaria vesca subsp. vesca]	4.081	2.02883	2.71809e-09	1.49156e-07	yes	up
FxaC_7g22000	FxaC_7g22000	PREDICTED: auxin-induced protein AUX28-like [Fragaria vesca subsp. vesca]	0.462	-1.11511	2.758e-09	1.51201e-07	yes	down
FxaC_22g64610	FxaC_22g64610	PREDICTED: receptor-like protein 12 isoform X2 [Fragaria vesca subsp. vesca]	3.357	1.74716	2.8021e-09	1.53472e-07	yes	up
FxaC_6g40290	FxaC_6g40290	Acyl transferase/acyl hydrolase/lysophospholipase [Cynara cardunculus var. scolymus]	2.68	1.42233	2.83577e-09	1.55167e-07	yes	up
FxaC_9g36990	FxaC_9g36990	PREDICTED: probable leucine-rich repeat receptor-like serine/threonine-protein kinase At3g14840 [Fragaria vesca subsp. vesca]	2.558	1.35515	2.85347e-09	1.55987e-07	yes	up
FxaC_27g49910	FxaC_27g49910	PREDICTED: protein TRANSPARENT TESTA 12-like [Fragaria vesca subsp. vesca]	2.589	1.3723	2.94997e-09	1.60955e-07	yes	up
FxaC_7g43610	FxaC_7g43610	PREDICTED: probable WRKY transcription factor 40 isoform X1 [Fragaria vesca subsp. vesca]	2.55	1.35031	2.9666e-09	1.61573e-07	yes	up
FxaC_22g30630	FxaC_22g30630	PREDICTED: basic leucine zipper 34 [Fragaria vesca subsp. vesca]	0.139	-2.84766	2.96695e-09	1.61573e-07	yes	down
FxaC_16g23760	FxaC_16g23760	PREDICTED: uncharacterized protein At1g04910-like [Fragaria vesca subsp. vesca]	0.348	-1.52143	2.97478e-09	1.61846e-07	yes	down
FxaC_3g15560	FxaC_3g15560	PREDICTED: probable caffeoyl-CoA O-methyltransferase At4g26220 [Fragaria vesca subsp. vesca]	0.243	-2.04206	3.02909e-09	1.64644e-07	yes	down
FxaC_3g04820	FxaC_3g04820	PREDICTED: probable chlorophyll(ide) b reductase NYC1, chloroplastic [Fragaria vesca subsp. vesca]	2.135	1.09426	3.04888e-09	1.65563e-07	yes	up
FxaC_25g33650	FxaC_25g33650	PREDICTED: cyclic nucleotide-gated ion channel 1-like [Fragaria vesca subsp. vesca]	2.775	1.47273	3.08871e-09	1.67566e-07	yes	up
FxaC_22g49710	FxaC_22g49710	PREDICTED: aquaporin TIP1-1-like [Fragaria vesca subsp. vesca]	0.161	-2.6319	3.11665e-09	1.68762e-07	yes	down
FxaC_17g49900	FxaC_17g49900	PREDICTED: UDP-glycosyltransferase 91C1 [Fragaria vesca subsp. vesca]	0.369	-1.43836	3.14588e-09	1.70184e-07	yes	down
FxaC_28g35170	FxaC_28g35170	PREDICTED: thioredoxin-like protein CITRX, chloroplastic [Fragaria vesca subsp. vesca]	3.711	1.89182	3.15717e-09	1.70633e-07	yes	up
FxaC_22g40620	FxaC_22g40620	PREDICTED: receptor-like protein 12 [Fragaria vesca subsp. vesca]	3.031	1.59974	3.21653e-09	1.73677e-07	yes	up
FxaC_5g23100	FxaC_5g23100	PREDICTED: uncharacterized protein LOC101290914 [Fragaria vesca subsp. vesca]	2.601	1.37913	3.26592e-09	1.76012e-07	yes	up
FxaC_17g07330	FxaC_17g07330	PREDICTED: WAT1-related protein At3g28050-like [Fragaria vesca subsp. vesca]	2.004	1.00274	3.30326e-09	1.7769e-07	yes	up
FxaC_6g06050	FxaC_6g06050	PREDICTED: bZIP transcription factor TRAB1 [Fragaria vesca subsp. vesca]	3.012	1.59079	3.43261e-09	1.84301e-07	yes	up
FxaC_21g26220	FxaC_21g26220	PREDICTED: putative phospholipid-transporting ATPase 4 [Fragaria vesca subsp. vesca]	2.002	1.00143	3.45802e-09	1.85492e-07	yes	up
FxaC_11g07130	FxaC_11g07130	PREDICTED: probable ubiquitin-conjugating enzyme E2 24 [Fragaria vesca subsp. vesca]	2.331	1.2209	3.49985e-09	1.8756e-07	yes	up
FxaC_16g02180	FxaC_16g02180	PREDICTED: uncharacterized protein LOC101297774 [Fragaria vesca subsp. vesca]	10.863	3.4414	3.60896e-09	1.93226e-07	yes	up
FxaC_11g30540	FxaC_11g30540	PREDICTED: pleiotropic drug resistance protein 2-like [Fragaria vesca subsp. vesca]	2.251	1.17073	3.74644e-09	2.00025e-07	yes	up
FxaC_19g32180	FxaC_19g32180	PREDICTED: chlorophyll a-b binding protein CP24 10A, chloroplastic [Fragaria vesca subsp. vesca]	0.481	-1.05615	3.75805e-09	2.00459e-07	yes	down
FxaC_20g12530	FxaC_20g12530	PREDICTED: uncharacterized protein LOC101292707 [Fragaria vesca subsp. vesca]	0.496	-1.01055	3.77204e-09	2.01018e-07	yes	down
FxaC_23g05600	FxaC_23g05600	beta-galactosidase [Fragaria x ananassa]	0.427	-1.22895	3.80928e-09	2.02813e-07	yes	down
FxaC_11g20420	FxaC_11g20420	PREDICTED: chlorophyll a-b binding protein 13, chloroplastic [Fragaria vesca subsp. vesca]	0.35	-1.51558	3.85687e-09	2.04966e-07	yes	down
FxaC_26g30100	FxaC_26g30100	PREDICTED: probable LRR receptor-like serine/threonine-protein kinase At3g47570 [Fragaria vesca subsp. vesca]	3.737	1.90178	3.88829e-09	2.06444e-07	yes	up
FxaC_4g34450	FxaC_4g34450	PREDICTED: uncharacterized protein LOC101291750 [Fragaria vesca subsp. vesca]	3.795	1.92393	3.90959e-09	2.07382e-07	yes	up
FxaC_24g42820	FxaC_24g42820	PREDICTED: midasin isoform X1 [Fragaria vesca subsp. vesca]	2.186	1.12853	3.92572e-09	2.08045e-07	yes	up
FxaC_5g10380	FxaC_5g10380	PREDICTED: acidic proline-rich protein PRP33-like [Fragaria vesca subsp. vesca]	2.769	1.46941	3.98196e-09	2.1083e-07	yes	up
FxaC_9g52160	FxaC_9g52160	PREDICTED: G-type lectin S-receptor-like serine/threonine-protein kinase At1g11410 [Fragaria vesca subsp. vesca]	3.087	1.62606	4.10046e-09	2.16704e-07	yes	up
FxaC_23g36410	FxaC_23g36410	PREDICTED: probable protein phosphatase 2C 5 [Fragaria vesca subsp. vesca]	0.5	-1.00116	4.15564e-09	2.19215e-07	yes	down
FxaC_5g04420	FxaC_5g04420	PREDICTED: primary amine oxidase-like [Fragaria vesca subsp. vesca]	4.296	2.103	4.17362e-09	2.19961e-07	yes	up
FxaC_4g10170	FxaC_4g10170	PREDICTED: uncharacterized protein LOC101314230 [Fragaria vesca subsp. vesca]	2.134	1.09383	4.32235e-09	2.2738e-07	yes	up
FxaC_1g38510	FxaC_1g38510	alpha-L-arabinofuranosidase [Fragaria x ananassa]	0.428	-1.22359	4.33497e-09	2.27835e-07	yes	down
FxaC_23g12770	FxaC_23g12770	PREDICTED: protein trichome birefringence-like 39 [Fragaria vesca subsp. vesca]	0.312	-1.68211	4.3877e-09	2.30394e-07	yes	down
FxaC_17g03980	FxaC_17g03980	PREDICTED: triacylglycerol lipase 2-like [Fragaria vesca subsp. vesca]	2.658	1.41015	4.48117e-09	2.34872e-07	yes	up
FxaC_7g05690	FxaC_7g05690	PREDICTED: uncharacterized protein LOC101303081 [Fragaria vesca subsp. vesca]	0.473	-1.08139	4.49263e-09	2.35257e-07	yes	down
FxaC_27g28780	FxaC_27g28780	PREDICTED: cyclic nucleotide-gated ion channel 1-like [Fragaria vesca subsp. vesca]	2.913	1.5424	4.5223e-09	2.36594e-07	yes	up
FxaC_1g03280	FxaC_1g03280	PREDICTED: probable receptor-like protein kinase At5g39030 [Fragaria vesca subsp. vesca]	2.778	1.47417	4.53272e-09	2.36922e-07	yes	up
FxaC_23g55690	FxaC_23g55690	PREDICTED: xyloglucan endotransglucosylase/hydrolase protein 9 [Fragaria vesca subsp. vesca]	0.213	-2.23204	4.58907e-09	2.39649e-07	yes	down
FxaC_16g27520	FxaC_16g27520	PREDICTED: ATP-citrate synthase alpha chain protein 1 [Fragaria vesca subsp. vesca]	2.184	1.12714	4.72199e-09	2.46141e-07	yes	up
FxaC_22g49240	FxaC_22g49240	PREDICTED: probable 2-oxoglutarate/Fe(II)-dependent dioxygenase [Fragaria vesca subsp. vesca]	5.612	2.4884	4.84098e-09	2.52114e-07	yes	up
FxaC_7g36270	FxaC_7g36270	PREDICTED: protein WEAK CHLOROPLAST MOVEMENT UNDER BLUE LIGHT 1 [Fragaria vesca subsp. vesca]	2.506	1.32528	4.89055e-09	2.54464e-07	yes	up
FxaC_1g07990	FxaC_1g07990	PREDICTED: putative transcription factor bHLH041 [Fragaria vesca subsp. vesca]	5.091	2.3479	4.89532e-09	2.54481e-07	yes	up
FxaC_9g24800	FxaC_9g24800	PREDICTED: probable CCR4-associated factor 1 homolog 11 [Fragaria vesca subsp. vesca]	3.338	1.73899	5.0115e-09	2.60048e-07	yes	up
FxaC_1g03390	FxaC_1g03390	PREDICTED: peroxidase 25 [Fragaria vesca subsp. vesca]	0.237	-2.07559	5.18882e-09	2.68762e-07	yes	down
FxaC_11g28060	FxaC_11g28060	PREDICTED: pleiotropic drug resistance protein 2-like [Fragaria vesca subsp. vesca]	2.584	1.36956	5.1977e-09	2.6887e-07	yes	up
FxaC_3g14670	FxaC_3g14670	PREDICTED: U-box domain-containing protein 5 [Fragaria vesca subsp. vesca]	2.117	1.08183	5.20276e-09	2.6887e-07	yes	up
FxaC_25g09170	FxaC_25g09170	PREDICTED: uncharacterized protein LOC105352902 [Fragaria vesca subsp. vesca]	2.269	1.18235	5.205e-09	2.6887e-07	yes	up
FxaC_1g08710	FxaC_1g08710	PREDICTED: protein ELF4-LIKE 3 [Fragaria vesca subsp. vesca]	0.45	-1.1527	5.34426e-09	2.75318e-07	yes	down
FxaC_5g07690	FxaC_5g07690	PREDICTED: chloroplast processing peptidase-like [Fragaria vesca subsp. vesca]	0.431	-1.21327	5.37894e-09	2.76856e-07	yes	down
FxaC_20g05200	FxaC_20g05200	PREDICTED: uncharacterized protein LOC105351441 [Fragaria vesca subsp. vesca]	3.779	1.91799	5.40337e-09	2.77863e-07	yes	up
FxaC_9g50800	FxaC_9g50800	PREDICTED: uncharacterized protein LOC101292191 [Fragaria vesca subsp. vesca]	2.482	1.31147	5.83208e-09	2.99103e-07	yes	up
FxaC_13g15630	FxaC_13g15630	PREDICTED: UDP-glycosyltransferase 74E1-like [Fragaria vesca subsp. vesca]	0.478	-1.06548	5.95159e-09	3.04414e-07	yes	down
FxaC_7g03610	FxaC_7g03610	Recname: Full=Cinnamate beta-D-glucosyltransferase; Altname: Full=UDP-glucose:cinnamate glucosyltransferase; Short=FaGT2 >gi|51705411|gb|AAU09443.1| UDP-glucose glucosyltransferase [Fragaria x ananassa]	0.088	-3.50427	6.18754e-09	3.15355e-07	yes	down
FxaC_15g12370	FxaC_15g12370	pleiotropic drug resistance protein 2-like [Rosa chinensis]	2.152	1.10552	6.19977e-09	3.15698e-07	yes	up
FxaC_17g03590	FxaC_17g03590	PREDICTED: uncharacterized protein LOC101295050 [Fragaria vesca subsp. vesca]	3.475	1.79702	6.25707e-09	3.18049e-07	yes	up
FxaC_7g40000	FxaC_7g40000	PREDICTED: ganglioside-induced differentiation-associated protein 2-like [Fragaria vesca subsp. vesca]	0.452	-1.1461	6.596e-09	3.3409e-07	yes	down
FxaC_15g08280	FxaC_15g08280	PREDICTED: uncharacterized protein At1g04910-like [Fragaria vesca subsp. vesca]	0.355	-1.49545	6.66414e-09	3.37243e-07	yes	down
FxaC_10g03680	FxaC_10g03680	PREDICTED: uncharacterized protein LOC102614982 [Citrus sinensis]	2.063	1.04458	6.80813e-09	3.44226e-07	yes	up
FxaC_18g30940	FxaC_18g30940	PREDICTED: cyclic dof factor 1 [Fragaria vesca subsp. vesca]	2.299	1.20111	6.9246e-09	3.49497e-07	yes	up
FxaC_20g13980	FxaC_20g13980	PREDICTED: phosphatidylinositol 4-kinase gamma 7-like [Fragaria vesca subsp. vesca]	2.244	1.1662	6.97586e-09	3.51774e-07	yes	up
FxaC_15g22210	FxaC_15g22210	PREDICTED: uncharacterized protein LOC101305932 [Fragaria vesca subsp. vesca]	0.083	-3.59759	7.12048e-09	3.57937e-07	yes	down
FxaC_24g43670	FxaC_24g43670	PREDICTED: 3-oxoacyl-[acyl-carrier-protein]	0.161	-2.63894	7.12309e-09	3.57937e-07	yes	down
FxaC_23g37320	FxaC_23g37320	PREDICTED: receptor-like protein 12 isoform X3 [Fragaria vesca subsp. vesca]	2.516	1.33099	7.26235e-09	3.64615e-07	yes	up
FxaC_24g12260	FxaC_24g12260	PREDICTED: pleiotropic drug resistance protein 3-like isoform X2 [Fragaria vesca subsp. vesca]	0.45	-1.15286	7.33327e-09	3.6753e-07	yes	down
FxaC_4g17100	FxaC_4g17100	PREDICTED: peroxidase 17-like [Fragaria vesca subsp. vesca]	4.39	2.13414	7.39728e-09	3.70091e-07	yes	up
FxaC_24g06970	FxaC_24g06970	PREDICTED: ethylene-responsive transcription factor 1B-like [Fragaria vesca subsp. vesca]	7.666	2.93854	7.44414e-09	3.71785e-07	yes	up
FxaC_9g05580	FxaC_9g05580	PREDICTED: pathogenesis-related genes transcriptional activator PTI6-like [Fragaria vesca subsp. vesca]	2.678	1.42098	7.45739e-09	3.71824e-07	yes	up
FxaC_9g39500	FxaC_9g39500	PREDICTED: G-type lectin S-receptor-like serine/threonine-protein kinase At4g27290 [Fragaria vesca subsp. vesca]	2.078	1.05541	7.45792e-09	3.71824e-07	yes	up
FxaC_3g08710	FxaC_3g08710	PREDICTED: auxin-binding protein ABP19a-like [Fragaria vesca subsp. vesca]	0.406	-1.29905	7.56121e-09	3.76645e-07	yes	down
FxaC_23g50810	FxaC_23g50810	PREDICTED: cyclic dof factor 2 [Fragaria vesca subsp. vesca]	2.132	1.09231	7.58672e-09	3.77588e-07	yes	up
FxaC_23g45250	FxaC_23g45250	PREDICTED: probable leucine-rich repeat receptor-like protein kinase At1g35710 isoform X3 [Fragaria vesca subsp. vesca]	2.389	1.25623	7.74244e-09	3.84335e-07	yes	up
FxaC_26g21200	FxaC_26g21200	PREDICTED: cyclic nucleotide-gated ion channel 1-like [Fragaria vesca subsp. vesca]	3.416	1.77229	7.82962e-09	3.8799e-07	yes	up
FxaC_10g15240	FxaC_10g15240	-	2.128	1.08938	8.0684e-09	3.99131e-07	yes	up
FxaC_12g44270	FxaC_12g44270	PREDICTED: uncharacterized protein LOC101302531 [Fragaria vesca subsp. vesca]	0.462	-1.11384	8.17489e-09	4.03702e-07	yes	down
FxaC_3g19460	FxaC_3g19460	PREDICTED: BTB/POZ and TAZ domain-containing protein 4 [Fragaria vesca subsp. vesca]	0.152	-2.7182	8.23104e-09	4.06124e-07	yes	down
FxaC_25g52520	FxaC_25g52520	PREDICTED: uncharacterized protein LOC101302889 [Fragaria vesca subsp. vesca]	5.191	2.37612	8.32939e-09	4.10622e-07	yes	up
FxaC_21g36030	FxaC_21g36030	PREDICTED: tyrosine aminotransferase-like isoform X1 [Fragaria vesca subsp. vesca]	0.2	-2.32517	8.34856e-09	4.11213e-07	yes	down
FxaC_13g00280	FxaC_13g00280	PREDICTED: uncharacterized protein LOC101290756 [Fragaria vesca subsp. vesca]	2.198	1.13648	8.41387e-09	4.14074e-07	yes	up
FxaC_13g27150	FxaC_13g27150	PREDICTED: major allergen Pru ar 1-like [Fragaria vesca subsp. vesca]	2.236	1.1607	8.44692e-09	4.15343e-07	yes	up
FxaC_21g10070	FxaC_21g10070	-	2.297	1.19965	8.91311e-09	4.37515e-07	yes	up
FxaC_7g01680	FxaC_7g01680	PREDICTED: pathogenesis-related protein 1-like [Fragaria vesca subsp. vesca]	0.409	-1.28975	8.9305e-09	4.37992e-07	yes	down
FxaC_26g21590	FxaC_26g21590	PREDICTED: hydroquinone glucosyltransferase-like [Fragaria vesca subsp. vesca]	2.139	1.09705	9.11191e-09	4.46125e-07	yes	up
FxaC_28g00840	FxaC_28g00840	PREDICTED: uncharacterized protein LOC101293238 [Fragaria vesca subsp. vesca]	2.392	1.25813	9.14199e-09	4.47215e-07	yes	up
FxaC_13g22950	FxaC_13g22950	PREDICTED: putative disease resistance protein At1g50180 [Fragaria vesca subsp. vesca]	3.959	1.98512	9.15223e-09	4.47334e-07	yes	up
FxaC_7g20050	FxaC_7g20050	uncharacterized protein LOC112172070 [Rosa chinensis]	2.141	1.09833	9.21064e-09	4.49805e-07	yes	up
FxaC_27g32050	FxaC_27g32050	PREDICTED: cyclic nucleotide-gated ion channel 1-like [Fragaria vesca subsp. vesca]	2.581	1.36777	9.24895e-09	4.51291e-07	yes	up
FxaC_27g04530	FxaC_27g04530	PREDICTED: sigma factor binding protein 1, chloroplastic-like [Fragaria vesca subsp. vesca]	3.205	1.68026	9.29466e-09	4.53134e-07	yes	up
FxaC_27g07120	FxaC_27g07120	PREDICTED: amidophosphoribosyltransferase, chloroplastic-like [Fragaria vesca subsp. vesca]	2.439	1.28658	9.32734e-09	4.54341e-07	yes	up
FxaC_20g23110	FxaC_20g23110	hypothetical chloroplast RF19 (chloroplast) [Fragaria orientalis]	0.121	-3.05135	9.39652e-09	4.57321e-07	yes	down
FxaC_4g25680	FxaC_4g25680	PREDICTED: calcium uniporter protein 2, mitochondrial [Fragaria vesca subsp. vesca]	0.359	-1.47631	9.58702e-09	4.65405e-07	yes	down
FxaC_10g11190	FxaC_10g11190	uncharacterized protein LOC112166393 [Rosa chinensis]	3.73	1.89911	9.6088e-09	4.66068e-07	yes	up
FxaC_3g06330	FxaC_3g06330	PREDICTED: receptor-like protein kinase HSL1 [Fragaria vesca subsp. vesca]	2.156	1.10866	9.79535e-09	4.74714e-07	yes	up
FxaC_14g00160	FxaC_14g00160	PREDICTED: uncharacterized protein LOC101306925 [Fragaria vesca subsp. vesca]	2.35	1.23273	9.8134e-09	4.75186e-07	yes	up
FxaC_16g25330	FxaC_16g25330	PREDICTED: uncharacterized protein LOC101300242 [Fragaria vesca subsp. vesca]	0.072	-3.80105	9.84911e-09	4.76512e-07	yes	down
FxaC_26g08460	FxaC_26g08460	PREDICTED: protein trichome birefringence-like 18 [Fragaria vesca subsp. vesca]	0.247	-2.01755	1.01122e-08	4.88005e-07	yes	down
FxaC_5g34130	FxaC_5g34130	PREDICTED: uncharacterized protein LOC101304648 [Fragaria vesca subsp. vesca]	2.968	1.56948	1.01839e-08	4.91048e-07	yes	up
FxaC_10g18830	FxaC_10g18830	PREDICTED: probable leucine-rich repeat receptor-like serine/threonine-protein kinase At3g14840 [Fragaria vesca subsp. vesca]	5.232	2.38743	1.05251e-08	5.07075e-07	yes	up
FxaC_21g11990	FxaC_21g11990	PREDICTED: uncharacterized protein LOC101314197 [Fragaria vesca subsp. vesca]	4.409	2.1405	1.0535e-08	5.07123e-07	yes	up
FxaC_6g02680	FxaC_6g02680	PREDICTED: serine carboxypeptidase-like 7 [Fragaria vesca subsp. vesca]	0.018	-5.75888	1.06596e-08	5.1269e-07	yes	down
FxaC_11g38870	FxaC_11g38870	PREDICTED: uncharacterized protein LOC101304248 isoform X1 [Fragaria vesca subsp. vesca]	2.02	1.01426	1.07718e-08	5.17655e-07	yes	up
FxaC_21g08000	FxaC_21g08000	PREDICTED: vacuolar amino acid transporter 1 [Fragaria vesca subsp. vesca]	0.349	-1.51714	1.07969e-08	5.18423e-07	yes	down
FxaC_12g18880	FxaC_12g18880	Photosystem II 5 kDa protein, chloroplastic [Trichinella nelsoni]	0.468	-1.0958	1.14056e-08	5.44908e-07	yes	down
FxaC_25g07200	FxaC_25g07200	PREDICTED: uncharacterized protein LOC101296999 [Fragaria vesca subsp. vesca]	2.036	1.02591	1.14622e-08	5.47154e-07	yes	up
FxaC_26g42240	FxaC_26g42240	PREDICTED: DNA-damage-repair/toleration protein DRT100 [Fragaria vesca subsp. vesca]	0.342	-1.54999	1.15616e-08	5.50979e-07	yes	down
FxaC_18g01090	FxaC_18g01090	uncharacterized protein LOC112180766 [Rosa chinensis]	0.418	-1.25964	1.15821e-08	5.51498e-07	yes	down
FxaC_17g03780	FxaC_17g03780	PREDICTED: uncharacterized protein LOC101294558 [Fragaria vesca subsp. vesca]	2.851	1.51122	1.17224e-08	5.57216e-07	yes	up
FxaC_10g08630	FxaC_10g08630	probable LRR receptor-like serine/threonine-protein kinase At3g47570 [Rosa chinensis]	6.91	2.78872	1.17314e-08	5.57216e-07	yes	up
FxaC_9g33790	FxaC_9g33790	PREDICTED: uncharacterized protein LOC105350912 [Fragaria vesca subsp. vesca]	2.338	1.22535	1.19485e-08	5.65652e-07	yes	up
FxaC_3g16870	FxaC_3g16870	PREDICTED: probable disease resistance protein At5g66900 [Fragaria vesca subsp. vesca]	2.436	1.28443	1.20119e-08	5.68182e-07	yes	up
FxaC_1g29010	FxaC_1g29010	PREDICTED: cell wall / vacuolar inhibitor of fructosidase 2 [Fragaria vesca subsp. vesca]	0.167	-2.5849	1.21024e-08	5.71533e-07	yes	down
FxaC_10g16370	FxaC_10g16370	PREDICTED: probable LRR receptor-like serine/threonine-protein kinase At1g56140 [Fragaria vesca subsp. vesca]	3.203	1.67942	1.21027e-08	5.71533e-07	yes	up
FxaC_10g07150	FxaC_10g07150	PREDICTED: UPF0051 protein ABCI8, chloroplastic [Fragaria vesca subsp. vesca]	2.133	1.09264	1.21792e-08	5.74673e-07	yes	up
FxaC_23g06190	FxaC_23g06190	PREDICTED: transcription factor bHLH87 [Fragaria vesca subsp. vesca]	0.322	-1.6341	1.28091e-08	6.02901e-07	yes	down
FxaC_28g00800	FxaC_28g00800	altered inheritance rate of mitochondria protein 25 [Rosa chinensis]	0.359	-1.47598	1.31726e-08	6.18486e-07	yes	down
FxaC_20g07640	FxaC_20g07640	PREDICTED: centromere protein X isoform X1 [Fragaria vesca subsp. vesca]	2.719	1.443	1.35043e-08	6.32689e-07	yes	up
FxaC_18g42820	FxaC_18g42820	PREDICTED: uncharacterized protein LOC105351810 [Fragaria vesca subsp. vesca]	7.578	2.92187	1.35083e-08	6.32689e-07	yes	up
FxaC_16g15310	FxaC_16g15310	PREDICTED: uncharacterized protein LOC101305932 [Fragaria vesca subsp. vesca]	0.021	-5.60028	1.35955e-08	6.35702e-07	yes	down
FxaC_18g42870	FxaC_18g42870	uncharacterized protein LOC112177456 [Rosa chinensis]	3.916	1.9694	1.36193e-08	6.35702e-07	yes	up
FxaC_5g36460	FxaC_5g36460	PREDICTED: protein PLANT CADMIUM RESISTANCE 2-like [Fragaria vesca subsp. vesca]	5.054	2.33733	1.38253e-08	6.44375e-07	yes	up
FxaC_12g35970	FxaC_12g35970	-	13.15	3.71697	1.38866e-08	6.46703e-07	yes	up
FxaC_19g09190	FxaC_19g09190	PREDICTED: uncharacterized protein LOC101313973 [Fragaria vesca subsp. vesca]	2.814	1.49269	1.39149e-08	6.47221e-07	yes	up
FxaC_22g47520	FxaC_22g47520	PREDICTED: uncharacterized protein LOC101313325 [Fragaria vesca subsp. vesca]	0.25	-2.0006	1.39529e-08	6.48209e-07	yes	down
FxaC_4g20920	FxaC_4g20920	PREDICTED: BTB/POZ and TAZ domain-containing protein 4 [Fragaria vesca subsp. vesca]	0.13	-2.94391	1.39921e-08	6.49504e-07	yes	down
FxaC_21g31720	FxaC_21g31720	PREDICTED: cucumber peeling cupredoxin-like [Fragaria vesca subsp. vesca]	3.958	1.98487	1.4055e-08	6.51895e-07	yes	up
FxaC_20g11770	FxaC_20g11770	hypothetical protein VIGAN_04051000 [Vigna angularis var. angularis]	0.153	-2.70943	1.49127e-08	6.89441e-07	yes	down
FxaC_11g19860	FxaC_11g19860	PREDICTED: peroxidase 47 [Fragaria vesca subsp. vesca]	0.399	-1.32494	1.51258e-08	6.98167e-07	yes	down
FxaC_9g19610	FxaC_9g19610	PREDICTED: serine carboxypeptidase-like 13 [Fragaria vesca subsp. vesca]	0.021	-5.55077	1.5241e-08	7.02915e-07	yes	down
FxaC_8g02430	FxaC_8g02430	PREDICTED: delta(7)-sterol-C5(6)-desaturase-like [Fragaria vesca subsp. vesca]	0.288	-1.79484	1.63657e-08	7.53573e-07	yes	down
FxaC_8g10830	FxaC_8g10830	PREDICTED: NADP-dependent malic enzyme [Fragaria vesca subsp. vesca]	0.374	-1.41979	1.6412e-08	7.55098e-07	yes	down
FxaC_8g20440	FxaC_8g20440	PREDICTED: auxin-induced protein AUX28-like [Fragaria vesca subsp. vesca]	0.36	-1.47295	1.6449e-08	7.5619e-07	yes	down
FxaC_10g15220	FxaC_10g15220	PREDICTED: probable leucine-rich repeat receptor-like protein kinase At1g35710 [Fragaria vesca subsp. vesca]	4.432	2.1479	1.64701e-08	7.56553e-07	yes	up
FxaC_24g22400	FxaC_24g22400	PREDICTED: uncharacterized permease C29B12.14c [Fragaria vesca subsp. vesca]	6.336	2.66351	1.66499e-08	7.64198e-07	yes	up
FxaC_16g24750	FxaC_16g24750	PREDICTED: UDP-glucose 6-dehydrogenase 2 [Fragaria vesca subsp. vesca]	0.446	-1.16524	1.68413e-08	7.72367e-07	yes	down
FxaC_22g57140	FxaC_22g57140	PREDICTED: ammonium transporter 2 [Fragaria vesca subsp. vesca]	3.289	1.71774	1.69277e-08	7.75708e-07	yes	up
FxaC_9g43000	FxaC_9g43000	putative protein kinase RLK-Pelle-WAK family [Rosa chinensis]	2.7	1.43295	1.71168e-08	7.82492e-07	yes	up
FxaC_8g16560	FxaC_8g16560	PREDICTED: ABC transporter C family member 14 [Fragaria vesca subsp. vesca]	2.015	1.01097	1.7222e-08	7.86675e-07	yes	up
FxaC_22g40610	FxaC_22g40610	PREDICTED: mediator of RNA polymerase II transcription subunit 7a-like [Fragaria vesca subsp. vesca]	2.364	1.24141	1.74262e-08	7.94731e-07	yes	up
FxaC_24g49360	FxaC_24g49360	PREDICTED: glucose-6-phosphate 1-dehydrogenase, chloroplastic-like [Fragaria vesca subsp. vesca]	0.107	-3.22924	1.79134e-08	8.16302e-07	yes	down
FxaC_22g08360	FxaC_22g08360	PREDICTED: receptor-like protein kinase FERONIA [Fragaria vesca subsp. vesca]	5.273	2.39857	1.80976e-08	8.24036e-07	yes	up
FxaC_2g20860	FxaC_2g20860	PREDICTED: 3-ketodihydrosphingosine reductase [Fragaria vesca subsp. vesca]	0.492	-1.02365	1.84716e-08	8.40399e-07	yes	down
FxaC_6g39430	FxaC_6g39430	PREDICTED: probable isoaspartyl peptidase/L-asparaginase 2 [Fragaria vesca subsp. vesca]	2.58	1.36736	1.86612e-08	8.48352e-07	yes	up
FxaC_1g21290	FxaC_1g21290	PREDICTED: tubulin alpha-3 chain [Fragaria vesca subsp. vesca]	0.456	-1.13436	1.88556e-08	8.55827e-07	yes	down
FxaC_11g28980	FxaC_11g28980	beta-1,3-glucanase [Fragaria x ananassa]	5.366	2.42374	1.89118e-08	8.57698e-07	yes	up
FxaC_8g10750	FxaC_8g10750	PREDICTED: monoglyceride lipase [Fragaria vesca subsp. vesca]	2.378	1.24964	1.89992e-08	8.6098e-07	yes	up
FxaC_19g32700	FxaC_19g32700	PREDICTED: protein NRT1/ PTR FAMILY 5.10-like [Fragaria vesca subsp. vesca]	0.193	-2.37623	1.92403e-08	8.70527e-07	yes	down
FxaC_7g25900	FxaC_7g25900	PREDICTED: blue-light photoreceptor PHR2 [Fragaria vesca subsp. vesca]	0.42	-1.25113	1.957e-08	8.84745e-07	yes	down
FxaC_17g19640	FxaC_17g19640	PREDICTED: cyclic dof factor 1 [Fragaria vesca subsp. vesca]	2.108	1.07571	1.97137e-08	8.90541e-07	yes	up
FxaC_25g07220	FxaC_25g07220	PREDICTED: uncharacterized protein LOC101296030 isoform X2 [Fragaria vesca subsp. vesca]	3.137	1.64918	2.00708e-08	9.04681e-07	yes	up
FxaC_26g10130	FxaC_26g10130	hypothetical protein PRUPE_2G270200 [Prunus persica]	2.441	1.28746	2.00742e-08	9.04681e-07	yes	up
FxaC_10g03540	FxaC_10g03540	PREDICTED: uncharacterized protein LOC101312912 [Fragaria vesca subsp. vesca]	2.542	1.3459	2.03152e-08	9.14825e-07	yes	up
FxaC_22g05790	FxaC_22g05790	PREDICTED: tubulin alpha-2 chain-like [Fragaria vesca subsp. vesca]	0.407	-1.29586	2.0543e-08	9.22902e-07	yes	down
FxaC_17g03800	FxaC_17g03800	PREDICTED: uncharacterized protein LOC101294558 [Fragaria vesca subsp. vesca]	3.113	1.63824	2.07833e-08	9.32965e-07	yes	up
FxaC_18g36610	FxaC_18g36610	uncharacterized protein LOC112177330 [Rosa chinensis]	0.385	-1.37714	2.14756e-08	9.62534e-07	yes	down
FxaC_13g09650	FxaC_13g09650	PREDICTED: uncharacterized protein At1g04910-like [Fragaria vesca subsp. vesca]	0.374	-1.4176	2.16628e-08	9.70166e-07	yes	down
FxaC_25g53740	FxaC_25g53740	PREDICTED: probable plastid-lipid-associated protein 14, chloroplastic [Fragaria vesca subsp. vesca]	0.091	-3.46069	2.18912e-08	9.79627e-07	yes	down
FxaC_13g48580	FxaC_13g48580	PREDICTED: disease resistance protein At4g27190-like isoform X2 [Fragaria vesca subsp. vesca]	3.772	1.91523	2.191e-08	9.797e-07	yes	up
FxaC_5g40600	FxaC_5g40600	PREDICTED: serine carboxypeptidase-like 17 [Fragaria vesca subsp. vesca]	0.022	-5.53601	2.2318e-08	9.97165e-07	yes	down
FxaC_15g09170	FxaC_15g09170	phosphate transporter PHO1-like protein 1 [Fragaria x ananassa]	2.207	1.14229	2.28601e-08	1.02059e-06	yes	up
FxaC_15g17710	FxaC_15g17710	-	0.47	-1.08818	2.30679e-08	1.02906e-06	yes	down
FxaC_20g12330	FxaC_20g12330	PREDICTED: protein ABIL2-like [Fragaria vesca subsp. vesca]	4.26	2.09095	2.32142e-08	1.03478e-06	yes	up
FxaC_16g21240	FxaC_16g21240	PREDICTED: uncharacterized protein LOC101308084 [Fragaria vesca subsp. vesca]	0.468	-1.09563	2.33024e-08	1.03791e-06	yes	down
FxaC_7g39760	FxaC_7g39760	PREDICTED: lysine histidine transporter-like 8 [Fragaria vesca subsp. vesca]	2.505	1.32489	2.33861e-08	1.04083e-06	yes	up
FxaC_22g18000	FxaC_22g18000	PREDICTED: GDSL esterase/lipase APG [Fragaria vesca subsp. vesca]	0.48	-1.05774	2.42815e-08	1.07816e-06	yes	down
FxaC_9g46450	FxaC_9g46450	zingipain-2-like [Rosa chinensis]	0.446	-1.16621	2.45551e-08	1.08862e-06	yes	down
FxaC_12g02290	FxaC_12g02290	PREDICTED: probable disease resistance protein At4g27220 isoform X4 [Fragaria vesca subsp. vesca]	2.307	1.20593	2.48386e-08	1.09949e-06	yes	up
FxaC_17g09580	FxaC_17g09580	PREDICTED: probable inactive leucine-rich repeat receptor-like protein kinase At3g03770 [Fragaria vesca subsp. vesca]	0.4	-1.32288	2.5035e-08	1.10647e-06	yes	down
FxaC_21g57530	FxaC_21g57530	PREDICTED: receptor-like protein 12 isoform X2 [Fragaria vesca subsp. vesca]	2.41	1.26887	2.59488e-08	1.1442e-06	yes	up
FxaC_5g36140	FxaC_5g36140	PREDICTED: 2-hydroxyisoflavanone dehydratase-like [Fragaria vesca subsp. vesca]	0.033	-4.93002	2.60719e-08	1.14786e-06	yes	down
FxaC_7g16870	FxaC_7g16870	hypothetical protein Ccrd_003635 [Cynara cardunculus var. scolymus]	2.207	1.14183	2.61088e-08	1.1486e-06	yes	up
FxaC_18g02590	FxaC_18g02590	protein DOWNSTREAM OF FLC-like [Rosa chinensis]	0.42	-1.25274	2.6256e-08	1.1542e-06	yes	down
FxaC_2g00560	FxaC_2g00560	PREDICTED: TMV resistance protein N-like [Fragaria vesca subsp. vesca]	2.67	1.41683	2.6341e-08	1.15698e-06	yes	up
FxaC_17g52970	FxaC_17g52970	PREDICTED: protein EXORDIUM-like, partial [Fragaria vesca subsp. vesca]	0.296	-1.75809	2.65545e-08	1.16425e-06	yes	down
FxaC_17g06910	FxaC_17g06910	PREDICTED: uncharacterized protein LOC105351820 [Fragaria vesca subsp. vesca]	44.813	5.48585	2.65662e-08	1.16425e-06	yes	up
FxaC_9g34100	FxaC_9g34100	PREDICTED: cysteine-rich receptor-like protein kinase 29 [Fragaria vesca subsp. vesca]	4.347	2.12017	2.66908e-08	1.16776e-06	yes	up
FxaC_10g29450	FxaC_10g29450	PREDICTED: transcription factor LHW [Fragaria vesca subsp. vesca]	2.703	1.43462	2.66914e-08	1.16776e-06	yes	up
FxaC_24g25630	FxaC_24g25630	PREDICTED: transcription repressor OFP13 [Fragaria vesca subsp. vesca]	0.331	-1.59381	2.68972e-08	1.17516e-06	yes	down
FxaC_8g34470	FxaC_8g34470	Recname: Full=Cinnamate beta-D-glucosyltransferase; Altname: Full=UDP-glucose:cinnamate glucosyltransferase; Short=FaGT2 >gi|51705411|gb|AAU09443.1| UDP-glucose glucosyltransferase [Fragaria x ananassa]	0.178	-2.48817	2.7224e-08	1.18853e-06	yes	down
FxaC_5g03350	FxaC_5g03350	PREDICTED: probable WRKY transcription factor 50 [Fragaria vesca subsp. vesca]	2.171	1.11827	2.83557e-08	1.23699e-06	yes	up
FxaC_3g23210	FxaC_3g23210	PREDICTED: peroxidase 17-like [Fragaria vesca subsp. vesca]	3.089	1.62714	2.85543e-08	1.24471e-06	yes	up
FxaC_6g34130	FxaC_6g34130	PREDICTED: uncharacterized protein LOC101313379 [Fragaria vesca subsp. vesca]	2.237	1.16187	2.89482e-08	1.26092e-06	yes	up
FxaC_25g21170	FxaC_25g21170	PREDICTED: uncharacterized protein LOC101306460 [Fragaria vesca subsp. vesca]	5.233	2.38756	2.9143e-08	1.26844e-06	yes	up
FxaC_15g10800	FxaC_15g10800	PREDICTED: amino-acid permease BAT1 isoform X1 [Fragaria vesca subsp. vesca]	3.666	1.87405	2.92985e-08	1.27424e-06	yes	up
FxaC_18g02860	FxaC_18g02860	PREDICTED: probable leucine-rich repeat receptor-like protein kinase At1g35710 [Prunus mume]	2.739	1.45345	2.93944e-08	1.27647e-06	yes	up
FxaC_6g31140	FxaC_6g31140	PREDICTED: delta(7)-sterol-C5(6)-desaturase-like [Fragaria vesca subsp. vesca]	0.324	-1.62712	2.95786e-08	1.2835e-06	yes	down
FxaC_28g20240	FxaC_28g20240	PREDICTED: cyclic nucleotide-gated ion channel 1-like [Fragaria vesca subsp. vesca]	2.665	1.41399	3.00758e-08	1.30211e-06	yes	up
FxaC_13g24620	FxaC_13g24620	PREDICTED: S-adenosylmethionine synthase 2 [Fragaria vesca subsp. vesca]	0.434	-1.20535	3.04679e-08	1.31809e-06	yes	down
FxaC_6g43450	FxaC_6g43450	PREDICTED: gibberellin-regulated protein 1 [Fragaria vesca subsp. vesca]	0.44	-1.186	3.10689e-08	1.34308e-06	yes	down
FxaC_6g40910	FxaC_6g40910	PREDICTED: probably inactive leucine-rich repeat receptor-like protein kinase At2g25790 [Fragaria vesca subsp. vesca]	2.954	1.5625	3.13623e-08	1.35371e-06	yes	up
FxaC_7g40690	FxaC_7g40690	PREDICTED: tubulin beta chain-like [Fragaria vesca subsp. vesca]	0.363	-1.4608	3.16571e-08	1.36541e-06	yes	down
FxaC_8g26580	FxaC_8g26580	PREDICTED: laccase-14-like [Fragaria vesca subsp. vesca]	0.022	-5.48713	3.20457e-08	1.37905e-06	yes	down
FxaC_10g03570	FxaC_10g03570	G-type lectin S-receptor-like serine/threonine-protein kinase RKS1 isoform X1 [Rosa chinensis]	3.085	1.62542	3.21127e-08	1.38089e-06	yes	up
FxaC_5g41510	FxaC_5g41510	PREDICTED: squalene monooxygenase-like [Fragaria vesca subsp. vesca]	3.863	1.94967	3.24249e-08	1.39327e-06	yes	up
FxaC_1g08640	FxaC_1g08640	PREDICTED: uncharacterized protein LOC101312960 [Fragaria vesca subsp. vesca]	0.499	-1.00379	3.32556e-08	1.4279e-06	yes	down
FxaC_10g41620	FxaC_10g41620	PREDICTED: ribulose bisphosphate carboxylase/oxygenase activase, chloroplastic-like [Fragaria vesca subsp. vesca]	2.064	1.04573	3.33378e-08	1.42928e-06	yes	up
FxaC_8g07620	FxaC_8g07620	gibberellin-regulated protein 11-like [Rosa chinensis]	0.129	-2.95046	3.36128e-08	1.43999e-06	yes	down
FxaC_21g52350	FxaC_21g52350	PREDICTED: ATP-dependent zinc metalloprotease FTSH 10, mitochondrial-like [Fragaria vesca subsp. vesca]	0.394	-1.34484	3.38447e-08	1.44776e-06	yes	down
FxaC_13g07700	FxaC_13g07700	PREDICTED: uncharacterized protein LOC101300242 [Fragaria vesca subsp. vesca]	0.071	-3.80644	3.4245e-08	1.46379e-06	yes	down
FxaC_15g33220	FxaC_15g33220	PREDICTED: probable xyloglucan endotransglucosylase/hydrolase protein 23 [Fragaria vesca subsp. vesca]	0.258	-1.95345	3.54562e-08	1.51217e-06	yes	down
FxaC_19g02650	FxaC_19g02650	PREDICTED: uncharacterized protein LOC101311382 [Fragaria vesca subsp. vesca]	2.087	1.06169	3.57299e-08	1.52158e-06	yes	up
FxaC_26g03630	FxaC_26g03630	PREDICTED: 1-aminocyclopropane-1-carboxylate oxidase 5 [Fragaria vesca subsp. vesca]	0.38	-1.39664	3.57949e-08	1.52321e-06	yes	down
FxaC_6g21840	FxaC_6g21840	PREDICTED: uncharacterized protein LOC101296442 [Fragaria vesca subsp. vesca]	0.394	-1.34432	3.65843e-08	1.55449e-06	yes	down
FxaC_23g32510	FxaC_23g32510	PREDICTED: ferritin-3, chloroplastic [Fragaria vesca subsp. vesca]	47.182	5.56017	3.74284e-08	1.588e-06	yes	up
FxaC_3g05460	FxaC_3g05460	hypothetical protein TorRG33x02_340930 [Trema orientalis]	0.412	-1.27986	3.77032e-08	1.59848e-06	yes	down
FxaC_22g04100	FxaC_22g04100	PREDICTED: putative phospholipid-transporting ATPase 8 [Fragaria vesca subsp. vesca]	2.069	1.04899	3.79454e-08	1.60755e-06	yes	up
FxaC_19g39450	FxaC_19g39450	protein DOWNSTREAM OF FLC-like [Rosa chinensis]	0.407	-1.29745	3.94111e-08	1.66595e-06	yes	down
FxaC_17g52980	FxaC_17g52980	PREDICTED: protein EXORDIUM-like [Fragaria vesca subsp. vesca]	0.384	-1.38159	3.97967e-08	1.67977e-06	yes	down
FxaC_2g25210	FxaC_2g25210	PREDICTED: tubulin alpha-3 chain [Fragaria vesca subsp. vesca]	0.497	-1.00824	4.00331e-08	1.68726e-06	yes	down
FxaC_25g06110	FxaC_25g06110	PREDICTED: WAT1-related protein At5g07050-like [Fragaria vesca subsp. vesca]	2.805	1.48788	4.0406e-08	1.70047e-06	yes	up
FxaC_8g28550	FxaC_8g28550	PREDICTED: auxin-induced protein 15A-like [Fragaria vesca subsp. vesca]	0.371	-1.43148	4.10493e-08	1.72627e-06	yes	down
FxaC_25g39440	FxaC_25g39440	PREDICTED: 3-ketoacyl-CoA synthase 21-like [Fragaria vesca subsp. vesca]	2.662	1.41263	4.14256e-08	1.73954e-06	yes	up
FxaC_4g26460	FxaC_4g26460	PREDICTED: random slug protein 5 [Fragaria vesca subsp. vesca]	2.117	1.0817	4.29781e-08	1.80209e-06	yes	up
FxaC_6g09760	FxaC_6g09760	PREDICTED: uncharacterized protein LOC101297887 [Fragaria vesca subsp. vesca]	0.469	-1.09246	4.336e-08	1.81544e-06	yes	down
FxaC_24g46390	FxaC_24g46390	PREDICTED: receptor-like protein kinase [Fragaria vesca subsp. vesca]	2.205	1.14062	4.42886e-08	1.84756e-06	yes	up
FxaC_3g20750	FxaC_3g20750	PREDICTED: probable xyloglucan endotransglucosylase/hydrolase protein 6 [Fragaria vesca subsp. vesca]	0.461	-1.11826	4.44649e-08	1.85357e-06	yes	down
FxaC_9g09760	FxaC_9g09760	PREDICTED: vacuolar cation/proton exchanger 3-like [Fragaria vesca subsp. vesca]	2.416	1.2727	4.55813e-08	1.89872e-06	yes	up
FxaC_6g07420	FxaC_6g07420	PREDICTED: very-long-chain enoyl-CoA reductase-like [Fragaria vesca subsp. vesca]	0.096	-3.38783	4.60201e-08	1.91561e-06	yes	down
FxaC_25g61270	FxaC_25g61270	PREDICTED: cyclic nucleotide-gated ion channel 1-like [Fragaria vesca subsp. vesca]	3.419	1.77353	4.61725e-08	1.92056e-06	yes	up
FxaC_2g28220	FxaC_2g28220	PREDICTED: annexin D1-like [Fragaria vesca subsp. vesca]	0.418	-1.25985	4.73053e-08	1.96482e-06	yes	down
FxaC_8g26600	FxaC_8g26600	PREDICTED: laccase-15-like [Fragaria vesca subsp. vesca]	3.945	1.97994	4.7676e-08	1.97878e-06	yes	up
FxaC_9g46200	FxaC_9g46200	PREDICTED: glutamate receptor 2.7-like [Fragaria vesca subsp. vesca]	2.091	1.06404	4.80715e-08	1.99375e-06	yes	up
FxaC_23g54600	FxaC_23g54600	PREDICTED: LOB domain-containing protein 41-like [Fragaria vesca subsp. vesca]	0.378	-1.40374	4.81821e-08	1.99689e-06	yes	down
FxaC_26g36580	FxaC_26g36580	PREDICTED: WAT1-related protein At5g07050-like [Fragaria vesca subsp. vesca]	2.523	1.33524	4.82528e-08	1.99837e-06	yes	up
FxaC_27g40440	FxaC_27g40440	PREDICTED: probable inactive receptor-like protein kinase At3g56050 isoform X1 [Fragaria vesca subsp. vesca]	2.134	1.09331	4.86243e-08	2.01085e-06	yes	up
FxaC_4g17070	FxaC_4g17070	hypothetical protein CUMW_038810 [Citrus unshiu]	3.593	1.84516	4.9222e-08	2.03116e-06	yes	up
FxaC_10g42200	FxaC_10g42200	PREDICTED: uncharacterized protein LOC101291415 [Fragaria vesca subsp. vesca]	0.473	-1.08001	4.95759e-08	2.04429e-06	yes	down
FxaC_6g20250	FxaC_6g20250	PREDICTED: receptor-like protein kinase THESEUS 1 [Fragaria vesca subsp. vesca]	0.461	-1.11766	4.98498e-08	2.05274e-06	yes	down
FxaC_4g35080	FxaC_4g35080	PREDICTED: leucine-rich repeat extensin-like protein 4 [Fragaria vesca subsp. vesca]	0.423	-1.24182	4.99285e-08	2.05366e-06	yes	down
FxaC_19g32430	FxaC_19g32430	PREDICTED: serine/threonine-protein kinase-like protein CCR4 [Fragaria vesca subsp. vesca]	6.551	2.71171	4.99467e-08	2.05366e-06	yes	up
FxaC_14g10200	FxaC_14g10200	PREDICTED: ribulose bisphosphate carboxylase small chain 1, chloroplastic [Fragaria vesca subsp. vesca]	2.378	1.24989	5.1014e-08	2.09604e-06	yes	up
FxaC_23g29870	FxaC_23g29870	PREDICTED: LOW QUALITY PROTEIN: putative receptor protein kinase ZmPK1 [Fragaria vesca subsp. vesca]	2.457	1.29677	5.11763e-08	2.1012e-06	yes	up
FxaC_18g46290	FxaC_18g46290	PREDICTED: acid beta-fructofuranosidase-like [Fragaria vesca subsp. vesca]	0.076	-3.72492	5.12969e-08	2.10464e-06	yes	down
FxaC_27g26080	FxaC_27g26080	WRKY transcription factor 51 [Fragaria vesca]	2.454	1.29533	5.19109e-08	2.12831e-06	yes	up
FxaC_4g13810	FxaC_4g13810	PREDICTED: pentatricopeptide repeat-containing protein At2g36980, mitochondrial [Fragaria vesca subsp. vesca]	0.425	-1.23613	5.27468e-08	2.16103e-06	yes	down
FxaC_12g30490	FxaC_12g30490	PREDICTED: L-type lectin-domain containing receptor kinase IX.1-like [Fragaria vesca subsp. vesca]	3.775	1.91643	5.35795e-08	2.19201e-06	yes	up
FxaC_1g18740	FxaC_1g18740	PREDICTED: protein SUPPRESSOR OF npr1-1, CONSTITUTIVE 1-like [Fragaria vesca subsp. vesca]	3.404	1.76734	5.38044e-08	2.19964e-06	yes	up
FxaC_12g12170	FxaC_12g12170	cytosolic ascorbate peroxidase [Fragaria x ananassa]	2.027	1.0195	5.39522e-08	2.20411e-06	yes	up
FxaC_16g11550	FxaC_16g11550	PREDICTED: UDP-glycosyltransferase 74E1-like [Fragaria vesca subsp. vesca]	0.487	-1.03885	5.41807e-08	2.21186e-06	yes	down
FxaC_6g17260	FxaC_6g17260	PREDICTED: protein TRANSPARENT TESTA 12-like [Fragaria vesca subsp. vesca]	0.038	-4.71152	5.4384e-08	2.21858e-06	yes	down
FxaC_24g52390	FxaC_24g52390	-	2.785	1.4779	5.47262e-08	2.22936e-06	yes	up
FxaC_10g30210	FxaC_10g30210	PREDICTED: lysosomal beta glucosidase-like [Fragaria vesca subsp. vesca]	0.497	-1.00769	5.49203e-08	2.23409e-06	yes	down
FxaC_12g48780	FxaC_12g48780	PREDICTED: arogenate dehydratase/prephenate dehydratase 1, chloroplastic isoform X2 [Fragaria vesca subsp. vesca]	0.428	-1.22564	5.52308e-08	2.24512e-06	yes	down
FxaC_18g42540	FxaC_18g42540	PREDICTED: aluminum-activated malate transporter 9-like [Fragaria vesca subsp. vesca]	0.445	-1.16917	5.58603e-08	2.2691e-06	yes	down
FxaC_17g04280	FxaC_17g04280	hypothetical protein CUMW_042710 [Citrus unshiu]	2.032	1.02315	5.60146e-08	2.27376e-06	yes	up
FxaC_28g28610	FxaC_28g28610	PREDICTED: cyclin-U4-1 [Fragaria vesca subsp. vesca]	0.336	-1.57193	5.74641e-08	2.32599e-06	yes	down
FxaC_12g37060	FxaC_12g37060	PREDICTED: vacuolar-sorting receptor 6 [Fragaria vesca subsp. vesca]	4.755	2.24953	5.87864e-08	2.37616e-06	yes	up
FxaC_5g27750	FxaC_5g27750	PREDICTED: laccase-14-like [Fragaria vesca subsp. vesca]	0.011	-6.48714	5.88595e-08	2.37618e-06	yes	down
FxaC_28g18460	FxaC_28g18460	anthranilate N-methyltransferase-like isoform X1 [Rosa chinensis]	0.082	-3.61056	5.88699e-08	2.37618e-06	yes	down
FxaC_14g14630	FxaC_14g14630	uncharacterized protein LOC111317697 [Durio zibethinus]	0.45	-1.15185	5.91852e-08	2.38722e-06	yes	down
FxaC_1g01450	FxaC_1g01450	PREDICTED: ras-related protein RHN1-like [Fragaria vesca subsp. vesca]	0.006	-7.35614	5.9377e-08	2.39327e-06	yes	down
FxaC_13g08310	FxaC_13g08310	PREDICTED: UDP-glucose 6-dehydrogenase 2 [Fragaria vesca subsp. vesca]	0.468	-1.09423	5.9497e-08	2.39642e-06	yes	down
FxaC_16g24900	FxaC_16g24900	PREDICTED: remorin isoform X2 [Fragaria vesca subsp. vesca]	0.394	-1.34438	5.97226e-08	2.40381e-06	yes	down
FxaC_13g46070	FxaC_13g46070	PREDICTED: uncharacterized protein At4g30180-like [Fragaria vesca subsp. vesca]	0.356	-1.4881	5.98302e-08	2.40645e-06	yes	down
FxaC_10g32010	FxaC_10g32010	PREDICTED: probable carboxylesterase 18 [Fragaria vesca subsp. vesca]	0.369	-1.43747	6.02175e-08	2.42033e-06	yes	down
FxaC_11g06980	FxaC_11g06980	PREDICTED: uncharacterized protein LOC101293376 [Fragaria vesca subsp. vesca]	0.458	-1.12634	6.11537e-08	2.45279e-06	yes	down
FxaC_6g40800	FxaC_6g40800	PREDICTED: auxin-responsive protein IAA2-like [Fragaria vesca subsp. vesca]	2.517	1.33166	6.12573e-08	2.45523e-06	yes	up
FxaC_9g28010	FxaC_9g28010	ATP synthase beta subunit, partial (chloroplast) [Spathelia splendens]	0.035	-4.82761	6.13861e-08	2.45866e-06	yes	down
FxaC_22g70600	FxaC_22g70600	PREDICTED: TMV resistance protein N-like [Fragaria vesca subsp. vesca]	22.366	4.48323	6.15947e-08	2.46185e-06	yes	up
FxaC_23g02720	FxaC_23g02720	laccase-14-like [Rosa chinensis]	0.056	-4.14603	6.19089e-08	2.47269e-06	yes	down
FxaC_18g17470	FxaC_18g17470	PREDICTED: cinnamoyl-CoA reductase 2-like [Fragaria vesca subsp. vesca]	3.074	1.6201	6.40872e-08	2.55612e-06	yes	up
FxaC_21g07560	FxaC_21g07560	PREDICTED: protein vip1-like [Fragaria vesca subsp. vesca]	0.457	-1.12869	6.52309e-08	2.59811e-06	yes	down
FxaC_22g06510	FxaC_22g06510	PREDICTED: probable calcium-binding protein CML45 [Fragaria vesca subsp. vesca]	4.747	2.24704	6.55695e-08	2.6079e-06	yes	up
FxaC_21g08320	FxaC_21g08320	PREDICTED: probable calcium-binding protein CML45 [Fragaria vesca subsp. vesca]	4.747	2.24704	6.55695e-08	2.6079e-06	yes	up
FxaC_26g09750	FxaC_26g09750	PREDICTED: uncharacterized protein At3g06530 isoform X2 [Fragaria vesca subsp. vesca]	2.048	1.03424	6.56132e-08	2.6079e-06	yes	up
FxaC_8g06400	FxaC_8g06400	PREDICTED: inositol-pentakisphosphate 2-kinase isoform X1 [Fragaria vesca subsp. vesca]	0.5	-1.00081	6.74523e-08	2.67728e-06	yes	down
FxaC_18g03710	FxaC_18g03710	PREDICTED: sugar transport protein 5 [Fragaria vesca subsp. vesca]	2.504	1.32419	6.78774e-08	2.69228e-06	yes	up
FxaC_27g15500	FxaC_27g15500	SOC1-like protein [Fragaria vesca]	0.323	-1.62909	6.80032e-08	2.6954e-06	yes	down
FxaC_26g18480	FxaC_26g18480	PREDICTED: probable receptor-like protein kinase At5g47070 [Fragaria vesca subsp. vesca]	2.06	1.04277	6.86394e-08	2.71874e-06	yes	up
FxaC_9g52090	FxaC_9g52090	PREDICTED: G-type lectin S-receptor-like serine/threonine-protein kinase At1g11410 [Fragaria vesca subsp. vesca]	3.333	1.73676	6.96149e-08	2.75547e-06	yes	up
FxaC_18g34270	FxaC_18g34270	PREDICTED: UPF0481 protein At3g47200-like [Fragaria vesca subsp. vesca]	2.643	1.40216	7.00071e-08	2.76717e-06	yes	up
FxaC_9g18370	FxaC_9g18370	PREDICTED: uncharacterized protein LOC101298572 [Fragaria vesca subsp. vesca]	2.223	1.15221	7.0193e-08	2.7726e-06	yes	up
FxaC_10g07210	FxaC_10g07210	PREDICTED: auxin response factor 3 [Fragaria vesca subsp. vesca]	2.348	1.23163	7.05092e-08	2.78125e-06	yes	up
FxaC_21g43400	FxaC_21g43400	PREDICTED: syntaxin-121 [Fragaria vesca subsp. vesca]	2.005	1.0039	7.14591e-08	2.81678e-06	yes	up
FxaC_28g38400	FxaC_28g38400	PREDICTED: cytochrome P450 705A20 [Fragaria vesca subsp. vesca]	3.93	1.97464	7.15226e-08	2.81734e-06	yes	up
FxaC_2g13680	FxaC_2g13680	PREDICTED: serine/threonine-protein kinase At5g01020-like [Fragaria vesca subsp. vesca]	4.229	2.08025	7.19145e-08	2.83083e-06	yes	up
FxaC_27g00420	FxaC_27g00420	PREDICTED: cytochrome P450 705A20 [Fragaria vesca subsp. vesca]	2.155	1.10802	7.26262e-08	2.85688e-06	yes	up
FxaC_19g04070	FxaC_19g04070	PREDICTED: uncharacterized protein LOC105351807 [Fragaria vesca subsp. vesca]	2.652	1.40716	7.60885e-08	2.98897e-06	yes	up
FxaC_28g09340	FxaC_28g09340	PREDICTED: probable inactive receptor-like protein kinase At3g56050 isoform X1 [Fragaria vesca subsp. vesca]	2.05	1.03589	7.6912e-08	3.01717e-06	yes	up
FxaC_24g20740	FxaC_24g20740	PREDICTED: uncharacterized protein LOC101308990 [Fragaria vesca subsp. vesca]	0.006	-7.48086	7.71681e-08	3.02515e-06	yes	down
FxaC_11g36410	FxaC_11g36410	PREDICTED: zinc finger protein ZAT8-like [Fragaria vesca subsp. vesca]	8.39	3.06874	7.78956e-08	3.05158e-06	yes	up
FxaC_8g33370	FxaC_8g33370	PREDICTED: bZIP transcription factor TRAB1 [Fragaria vesca subsp. vesca]	2.952	1.56145	7.86631e-08	3.07743e-06	yes	up
FxaC_11g00310	FxaC_11g00310	G-type lectin S-receptor-like serine/threonine-protein kinase At1g61500 [Rosa chinensis]	2.689	1.427	8.00312e-08	3.12882e-06	yes	up
FxaC_12g35940	FxaC_12g35940	MDIS1-interacting receptor like kinase 2-like [Rosa chinensis]	3.315	1.72885	8.06695e-08	3.15162e-06	yes	up
FxaC_1g11350	FxaC_1g11350	PREDICTED: ankyrin repeat-containing protein At3g12360-like [Fragaria vesca subsp. vesca]	2.946	1.55884	8.12701e-08	3.17075e-06	yes	up
FxaC_12g22530	FxaC_12g22530	putative non-specific serine/threonine protein kinase [Rosa chinensis]	69.385	6.11655	8.14319e-08	3.1749e-06	yes	up
FxaC_8g37210	FxaC_8g37210	PREDICTED: UDP-glycosyltransferase 74E1-like [Fragaria vesca subsp. vesca]	0.407	-1.29834	8.16131e-08	3.1798e-06	yes	down
FxaC_21g20290	FxaC_21g20290	PREDICTED: wall-associated receptor kinase-like 1 [Fragaria vesca subsp. vesca]	5.866	2.55229	8.2936e-08	3.22257e-06	yes	up
FxaC_21g56300	FxaC_21g56300	PREDICTED: glycerol-3-phosphate 2-O-acyltransferase 6 [Fragaria vesca subsp. vesca]	0.38	-1.39501	8.42598e-08	3.26957e-06	yes	down
FxaC_16g01290	FxaC_16g01290	PREDICTED: early light-induced protein 1, chloroplastic-like [Fragaria vesca subsp. vesca]	2.558	1.35506	8.4333e-08	3.27019e-06	yes	up
FxaC_18g42850	FxaC_18g42850	uncharacterized protein LOC112177455 [Rosa chinensis]	2.341	1.22713	8.45142e-08	3.275e-06	yes	up
FxaC_10g02960	FxaC_10g02960	PREDICTED: uncharacterized protein LOC101303095 [Fragaria vesca subsp. vesca]	2.315	1.21089	8.59269e-08	3.32299e-06	yes	up
FxaC_11g00120	FxaC_11g00120	PREDICTED: G-type lectin S-receptor-like serine/threonine-protein kinase At1g11410 [Fragaria vesca subsp. vesca]	2.71	1.43823	8.66744e-08	3.34963e-06	yes	up
FxaC_11g13380	FxaC_11g13380	PREDICTED: probable LRR receptor-like serine/threonine-protein kinase At4g08850 [Fragaria vesca subsp. vesca]	2.926	1.54907	8.71359e-08	3.3652e-06	yes	up
FxaC_17g51190	FxaC_17g51190	PREDICTED: uncharacterized protein LOC101306532 [Fragaria vesca subsp. vesca]	0.5	-1.00081	8.74017e-08	3.37091e-06	yes	down
FxaC_8g09650	FxaC_8g09650	PREDICTED: probable xyloglucan glycosyltransferase 5 [Fragaria vesca subsp. vesca]	0.407	-1.29564	8.86871e-08	3.41589e-06	yes	down
FxaC_23g16690	FxaC_23g16690	PREDICTED: magnesium-chelatase subunit ChlH, chloroplastic [Fragaria vesca subsp. vesca]	2.17	1.11758	8.92836e-08	3.43486e-06	yes	up
FxaC_21g71150	FxaC_21g71150	PREDICTED: probable receptor-like protein kinase At1g67000 [Fragaria vesca subsp. vesca]	2.019	1.01351	8.92999e-08	3.43486e-06	yes	up
FxaC_20g22830	FxaC_20g22830	PREDICTED: putative invertase inhibitor [Fragaria vesca subsp. vesca]	0.059	-4.08543	9.02904e-08	3.47063e-06	yes	down
FxaC_22g71530	FxaC_22g71530	PREDICTED: cytochrome P450 714C2-like [Fragaria vesca subsp. vesca]	2.573	1.36361	9.12676e-08	3.50349e-06	yes	up
FxaC_10g22240	FxaC_10g22240	PREDICTED: NAC domain-containing protein 18-like [Fragaria vesca subsp. vesca]	5.166	2.369	9.15596e-08	3.51234e-06	yes	up
FxaC_8g05640	FxaC_8g05640	PREDICTED: anthocyanidin 3-O-glucosyltransferase 5-like [Fragaria vesca subsp. vesca]	4.381	2.13117	9.48626e-08	3.63175e-06	yes	up
FxaC_13g49970	FxaC_13g49970	PREDICTED: LOW QUALITY PROTEIN: ammonium transporter 1 member 1 [Fragaria vesca subsp. vesca]	2.043	1.03056	9.5661e-08	3.65742e-06	yes	up
FxaC_11g00270	FxaC_11g00270	PREDICTED: uncharacterized protein LOC101312912 [Fragaria vesca subsp. vesca]	2.187	1.129	9.74328e-08	3.71771e-06	yes	up
FxaC_15g18400	FxaC_15g18400	EREBP [Fragaria x ananassa]	2.064	1.04565	9.8785e-08	3.76103e-06	yes	up
FxaC_22g27930	FxaC_22g27930	PREDICTED: uncharacterized protein LOC101313973 [Fragaria vesca subsp. vesca]	3.329	1.73511	9.8831e-08	3.76103e-06	yes	up
FxaC_13g14710	FxaC_13g14710	PREDICTED: vacuolar amino acid transporter 1 isoform X2 [Fragaria vesca subsp. vesca]	2.436	1.28446	9.90177e-08	3.76563e-06	yes	up
FxaC_22g01430	FxaC_22g01430	PREDICTED: ACT domain-containing protein ACR6 [Fragaria vesca subsp. vesca]	2.634	1.39723	9.98397e-08	3.79437e-06	yes	up
FxaC_23g14270	FxaC_23g14270	PREDICTED: protein trichome birefringence-like 39 [Fragaria vesca subsp. vesca]	0.347	-1.52566	1.00001e-07	3.79798e-06	yes	down
FxaC_24g20810	FxaC_24g20810	extensin-like [Rosa chinensis]	0.341	-1.55074	1.03227e-07	3.90754e-06	yes	down
FxaC_24g29040	FxaC_24g29040	PREDICTED: polygalacturonase inhibitor [Fragaria vesca subsp. vesca]	0.19	-2.39363	1.06503e-07	4.02622e-06	yes	down
FxaC_5g00390	FxaC_5g00390	PREDICTED: homeobox-leucine zipper protein ATHB-8 [Fragaria vesca subsp. vesca]	2.209	1.14363	1.08423e-07	4.0907e-06	yes	up
FxaC_13g03290	FxaC_13g03290	PREDICTED: potassium transporter 6-like isoform X1 [Fragaria vesca subsp. vesca]	2.341	1.22737	1.08733e-07	4.09968e-06	yes	up
FxaC_2g04390	FxaC_2g04390	PREDICTED: beta-galactosidase isoform X1 [Fragaria vesca subsp. vesca]	0.48	-1.05849	1.13209e-07	4.25445e-06	yes	down
FxaC_14g05340	FxaC_14g05340	PREDICTED: U-box domain-containing protein 11 [Fragaria vesca subsp. vesca]	0.389	-1.36388	1.16755e-07	4.37335e-06	yes	down
FxaC_9g21430	FxaC_9g21430	PREDICTED: photosystem II 5 kDa protein, chloroplastic [Fragaria vesca subsp. vesca]	0.495	-1.01485	1.16956e-07	4.37799e-06	yes	down
FxaC_11g11090	FxaC_11g11090	PREDICTED: probable glutathione S-transferase [Fragaria vesca subsp. vesca]	0.423	-1.24275	1.19449e-07	4.46258e-06	yes	down
FxaC_24g20390	FxaC_24g20390	PREDICTED: uncharacterized protein LOC105353328 [Fragaria vesca subsp. vesca]	0.429	-1.22195	1.20951e-07	4.51278e-06	yes	down
FxaC_12g47220	FxaC_12g47220	PREDICTED: G-type lectin S-receptor-like serine/threonine-protein kinase At1g11410 [Fragaria vesca subsp. vesca]	2.795	1.48274	1.21538e-07	4.52327e-06	yes	up
FxaC_21g28890	FxaC_21g28890	PREDICTED: aquaporin TIP2-1 [Fragaria vesca subsp. vesca]	0.325	-1.6236	1.21548e-07	4.52327e-06	yes	down
FxaC_22g61390	FxaC_22g61390	PREDICTED: uncharacterized protein LOC101293694 isoform X2 [Fragaria vesca subsp. vesca]	2.306	1.20569	1.22134e-07	4.53918e-06	yes	up
FxaC_24g02280	FxaC_24g02280	PREDICTED: receptor-like serine/threonine-protein kinase SD1-8 [Fragaria vesca subsp. vesca]	2.961	1.56606	1.25362e-07	4.65008e-06	yes	up
FxaC_25g42040	FxaC_25g42040	PREDICTED: UDP-glycosyltransferase 76C2-like [Fragaria vesca subsp. vesca]	2.522	1.33462	1.25951e-07	4.66552e-06	yes	up
FxaC_16g10440	FxaC_16g10440	PREDICTED: heptahelical transmembrane protein 2-like isoform X2 [Fragaria vesca subsp. vesca]	2.267	1.18074	1.26022e-07	4.66552e-06	yes	up
FxaC_20g41350	FxaC_20g41350	PREDICTED: nitrate reductase [NADH]	3.541	1.82395	1.29539e-07	4.78642e-06	yes	up
FxaC_21g45690	FxaC_21g45690	PREDICTED: iron-sulfur assembly protein IscA-like 1, mitochondrial [Fragaria vesca subsp. vesca]	3.279	1.71322	1.30795e-07	4.8266e-06	yes	up
FxaC_23g20160	FxaC_23g20160	PREDICTED: uncharacterized protein At5g39865-like [Fragaria vesca subsp. vesca]	0.176	-2.50612	1.3112e-07	4.83549e-06	yes	down
FxaC_2g22970	FxaC_2g22970	PREDICTED: putative pentatricopeptide repeat-containing protein At1g69350, mitochondrial [Fragaria vesca subsp. vesca]	3.03	1.5993	1.31556e-07	4.84608e-06	yes	up
FxaC_21g69910	FxaC_21g69910	PREDICTED: endoribonuclease Dicer homolog 2 [Fragaria vesca subsp. vesca]	0.34	-1.55708	1.31577e-07	4.84608e-06	yes	down
FxaC_18g46280	FxaC_18g46280	PREDICTED: monocopper oxidase-like protein SKU5 [Fragaria vesca subsp. vesca]	0.38	-1.39577	1.35045e-07	4.96172e-06	yes	down
FxaC_20g15550	FxaC_20g15550	PREDICTED: cyclic dof factor 1 [Fragaria vesca subsp. vesca]	2.26	1.17639	1.35803e-07	4.98569e-06	yes	up
FxaC_24g45630	FxaC_24g45630	PREDICTED: pumilio homolog 5 [Fragaria vesca subsp. vesca]	2.435	1.28386	1.3737e-07	5.03997e-06	yes	up
FxaC_19g11630	FxaC_19g11630	PREDICTED: protein ABIL2-like [Fragaria vesca subsp. vesca]	3.413	1.77111	1.39232e-07	5.10367e-06	yes	up
FxaC_22g17860	FxaC_22g17860	PREDICTED: ABC transporter C family member 8-like [Fragaria vesca subsp. vesca]	0.204	-2.29363	1.39284e-07	5.10367e-06	yes	down
FxaC_1g13450	FxaC_1g13450	PREDICTED: probable serine protease EDA2 isoform X1 [Fragaria vesca subsp. vesca]	0.393	-1.34707	1.39892e-07	5.12267e-06	yes	down
FxaC_27g51830	FxaC_27g51830	PREDICTED: metal-nicotianamine transporter YSL3 isoform X2 [Fragaria vesca subsp. vesca]	2.548	1.34931	1.40171e-07	5.1296e-06	yes	up
FxaC_12g28380	FxaC_12g28380	PREDICTED: phytohormone-binding protein-like [Fragaria vesca subsp. vesca]	3.812	1.93052	1.42109e-07	5.19387e-06	yes	up
FxaC_20g25840	FxaC_20g25840	PREDICTED: disease resistance protein RPM1-like [Fragaria vesca subsp. vesca]	2.65	1.4062	1.43044e-07	5.22471e-06	yes	up
FxaC_8g25990	FxaC_8g25990	PREDICTED: phytosulfokine receptor 2 [Fragaria vesca subsp. vesca]	2.576	1.36492	1.52262e-07	5.51719e-06	yes	up
FxaC_23g39090	FxaC_23g39090	PREDICTED: uncharacterized protein LOC101293694 isoform X2 [Fragaria vesca subsp. vesca]	2.243	1.16515	1.53157e-07	5.54456e-06	yes	up
FxaC_19g21400	FxaC_19g21400	-	0.416	-1.26554	1.5429e-07	5.58205e-06	yes	down
FxaC_20g07220	FxaC_20g07220	PREDICTED: U-box domain-containing protein 52-like isoform X1 [Fragaria vesca subsp. vesca]	0.463	-1.11047	1.55182e-07	5.61078e-06	yes	down
FxaC_18g46150	FxaC_18g46150	PREDICTED: uncharacterized protein LOC101292210 [Fragaria vesca subsp. vesca]	2.596	1.3764	1.56523e-07	5.65185e-06	yes	up
FxaC_28g38720	FxaC_28g38720	PREDICTED: cytochrome P450 705A20 [Fragaria vesca subsp. vesca]	3.623	1.85725	1.56615e-07	5.65185e-06	yes	up
FxaC_28g17130	FxaC_28g17130	phenylalanine ammonia-lyase 1 [Fragaria x ananassa]	2.011	1.00814	1.60522e-07	5.77466e-06	yes	up
FxaC_27g25150	FxaC_27g25150	PREDICTED: uncharacterized protein LOC101306460 [Fragaria vesca subsp. vesca]	4.013	2.00452	1.62469e-07	5.84103e-06	yes	up
FxaC_23g17110	FxaC_23g17110	PREDICTED: guanylate kinase 2-like [Fragaria vesca subsp. vesca]	2.242	1.16488	1.63888e-07	5.88525e-06	yes	up
FxaC_23g60940	FxaC_23g60940	PREDICTED: protein TRANSPARENT TESTA 12-like [Fragaria vesca subsp. vesca]	2.096	1.06739	1.63905e-07	5.88525e-06	yes	up
FxaC_13g30780	FxaC_13g30780	PREDICTED: serine hydroxymethyltransferase 4 [Fragaria vesca subsp. vesca]	0.497	-1.00781	1.64393e-07	5.89908e-06	yes	down
FxaC_11g47380	FxaC_11g47380	PREDICTED: probable leucine-rich repeat receptor-like protein kinase At1g35710 [Fragaria vesca subsp. vesca]	137.671	7.10508	1.6583e-07	5.9469e-06	yes	up
FxaC_17g35220	FxaC_17g35220	PREDICTED: cinnamoyl-CoA reductase 2-like [Fragaria vesca subsp. vesca]	2.318	1.21316	1.69047e-07	6.05849e-06	yes	up
FxaC_23g32220	FxaC_23g32220	PREDICTED: probable transcription factor KAN2 [Fragaria vesca subsp. vesca]	2.922	1.54676	1.71448e-07	6.13685e-06	yes	up
FxaC_24g46540	FxaC_24g46540	PREDICTED: protein trichome birefringence-like 43 [Fragaria vesca subsp. vesca]	0.187	-2.41747	1.72356e-07	6.16223e-06	yes	down
FxaC_17g03060	FxaC_17g03060	PREDICTED: BTB/POZ domain-containing protein At5g41330 [Fragaria vesca subsp. vesca]	2.97	1.57057	1.72489e-07	6.16254e-06	yes	up
FxaC_13g18210	FxaC_13g18210	PREDICTED: putative zinc finger protein At1g68190 isoform X1 [Fragaria vesca subsp. vesca]	0.448	-1.15815	1.72719e-07	6.16691e-06	yes	down
FxaC_17g06580	FxaC_17g06580	PREDICTED: probable WRKY transcription factor 53 [Fragaria vesca subsp. vesca]	2.452	1.29408	1.73504e-07	6.19109e-06	yes	up
FxaC_10g04260	FxaC_10g04260	PREDICTED: LOW QUALITY PROTEIN: cysteine-rich receptor-like protein kinase 10 [Fragaria vesca subsp. vesca]	2.608	1.38304	1.74066e-07	6.20726e-06	yes	up
FxaC_24g18180	FxaC_24g18180	PREDICTED: LOW QUALITY PROTEIN: putative receptor protein kinase ZmPK1 [Fragaria vesca subsp. vesca]	5.154	2.36568	1.77874e-07	6.33122e-06	yes	up
FxaC_21g54450	FxaC_21g54450	PREDICTED: uncharacterized protein LOC101294772 [Fragaria vesca subsp. vesca]	0.242	-2.04932	1.84953e-07	6.55873e-06	yes	down
FxaC_4g22590	FxaC_4g22590	PREDICTED: probable disease resistance protein At5g66900 isoform X1 [Fragaria vesca subsp. vesca]	2.349	1.23232	1.86495e-07	6.60927e-06	yes	up
FxaC_10g41300	FxaC_10g41300	PREDICTED: scarecrow-like protein 30 [Fragaria vesca subsp. vesca]	3.965	1.98723	1.86609e-07	6.60927e-06	yes	up
FxaC_21g49690	FxaC_21g49690	extensin-like [Rosa chinensis]	0.298	-1.74442	1.88453e-07	6.6622e-06	yes	down
FxaC_13g53880	FxaC_13g53880	PREDICTED: auxin-responsive protein IAA4 [Fragaria vesca subsp. vesca]	2.064	1.04552	1.89831e-07	6.70265e-06	yes	up
FxaC_12g41790	FxaC_12g41790	PREDICTED: glutamate receptor 2.7-like [Fragaria vesca subsp. vesca]	3.333	1.73687	1.90549e-07	6.72385e-06	yes	up
FxaC_15g29500	FxaC_15g29500	PREDICTED: uncharacterized protein At4g30180-like [Fragaria vesca subsp. vesca]	0.36	-1.47523	1.90766e-07	6.72736e-06	yes	down
FxaC_10g04550	FxaC_10g04550	PREDICTED: homeobox-leucine zipper protein PROTODERMAL FACTOR 2-like [Fragaria vesca subsp. vesca]	0.463	-1.11012	1.90969e-07	6.73038e-06	yes	down
FxaC_12g12150	FxaC_12g12150	PREDICTED: mitogen-activated protein kinase 3 [Fragaria vesca subsp. vesca]	2.076	1.05399	1.92645e-07	6.78526e-06	yes	up
FxaC_16g27610	FxaC_16g27610	hypothetical protein CUMW_137170 [Citrus unshiu]	0.422	-1.24538	1.93151e-07	6.79889e-06	yes	down
FxaC_23g19220	FxaC_23g19220	PREDICTED: protein RRP5 homolog [Fragaria vesca subsp. vesca]	2.031	1.02214	1.96036e-07	6.88775e-06	yes	up
FxaC_20g03470	FxaC_20g03470	hypothetical protein PanWU01x14_301410, partial [Parasponia andersonii]	2.446	1.29056	1.96164e-07	6.888e-06	yes	up
FxaC_11g36420	FxaC_11g36420	PREDICTED: zinc finger protein ZAT11-like [Fragaria vesca subsp. vesca]	4.058	2.02076	1.98546e-07	6.9552e-06	yes	up
FxaC_1g10200	FxaC_1g10200	PREDICTED: sucrose synthase [Fragaria vesca subsp. vesca]	0.4	-1.32198	1.98564e-07	6.9552e-06	yes	down
FxaC_14g06420	FxaC_14g06420	PREDICTED: cyclic dof factor 3 [Fragaria vesca subsp. vesca]	2.716	1.44129	1.99059e-07	6.96828e-06	yes	up
FxaC_25g06010	FxaC_25g06010	PREDICTED: probable carboxylesterase 15 [Fragaria vesca subsp. vesca]	2.56	1.35621	1.99459e-07	6.97802e-06	yes	up
FxaC_28g28190	FxaC_28g28190	PREDICTED: uncharacterized protein LOC101294223 isoform X1 [Fragaria vesca subsp. vesca]	3.617	1.8546	1.99645e-07	6.98027e-06	yes	up
FxaC_19g00420	FxaC_19g00420	PREDICTED: legumain [Fragaria vesca subsp. vesca]	6.047	2.59615	2.00079e-07	6.98994e-06	yes	up
FxaC_19g05000	FxaC_19g05000	PREDICTED: probable WRKY transcription factor 53 [Fragaria vesca subsp. vesca]	2.704	1.43531	2.00449e-07	6.99556e-06	yes	up
FxaC_5g38120	FxaC_5g38120	Recname: Full=Cinnamate beta-D-glucosyltransferase; Altname: Full=UDP-glucose:cinnamate glucosyltransferase; Short=FaGT2 >gi|51705411|gb|AAU09443.1| UDP-glucose glucosyltransferase [Fragaria x ananassa]	0.158	-2.66578	2.01309e-07	7.02128e-06	yes	down
FxaC_27g01290	FxaC_27g01290	PREDICTED: nuclear transcription factor Y subunit A-4-like isoform X1 [Fragaria vesca subsp. vesca]	2.941	1.55651	2.03181e-07	7.07793e-06	yes	up
FxaC_12g11200	FxaC_12g11200	PREDICTED: monofunctional riboflavin biosynthesis protein RIBA 3, chloroplastic [Fragaria vesca subsp. vesca]	0.479	-1.06062	2.07072e-07	7.20474e-06	yes	down
FxaC_19g25820	FxaC_19g25820	PREDICTED: cinnamoyl-CoA reductase 2-like [Fragaria vesca subsp. vesca]	3.001	1.58557	2.14626e-07	7.45848e-06	yes	up
FxaC_7g14550	FxaC_7g14550	PREDICTED: cytochrome P450 87A3-like [Fragaria vesca subsp. vesca]	2.372	1.24604	2.15298e-07	7.4773e-06	yes	up
FxaC_17g25820	FxaC_17g25820	-	3.684	1.88136	2.22245e-07	7.69987e-06	yes	up
FxaC_19g04540	FxaC_19g04540	hypothetical protein RchiOBHm_Chr7g0195541 [Rosa chinensis]	2.614	1.3863	2.22443e-07	7.70207e-06	yes	up
FxaC_8g07450	FxaC_8g07450	PREDICTED: endoglucanase 10-like [Fragaria vesca subsp. vesca]	0.287	-1.80315	2.22882e-07	7.70794e-06	yes	down
FxaC_7g14500	FxaC_7g14500	PREDICTED: probable flavin-containing monooxygenase 1 [Fragaria vesca subsp. vesca]	0.077	-3.70752	2.2502e-07	7.77719e-06	yes	down
FxaC_22g17010	FxaC_22g17010	PREDICTED: xyloglucan endotransglucosylase/hydrolase 2-like [Fragaria vesca subsp. vesca]	0.057	-4.13091	2.25632e-07	7.78575e-06	yes	down
FxaC_7g36900	FxaC_7g36900	PREDICTED: uncharacterized protein LOC101296545 [Fragaria vesca subsp. vesca]	2.629	1.39445	2.25676e-07	7.78575e-06	yes	up
FxaC_17g14840	FxaC_17g14840	PREDICTED: respiratory burst oxidase homolog protein C [Fragaria vesca subsp. vesca]	2.165	1.11454	2.26497e-07	7.80468e-06	yes	up
FxaC_17g06460	FxaC_17g06460	PREDICTED: uncharacterized protein LOC18606668 [Theobroma cacao]	2.975	1.57293	2.30276e-07	7.93013e-06	yes	up
FxaC_6g43520	FxaC_6g43520	PREDICTED: tubulin beta chain-like [Fragaria vesca subsp. vesca]	0.313	-1.67367	2.35199e-07	8.08991e-06	yes	down
FxaC_22g36200	FxaC_22g36200	PREDICTED: probable transcription factor KAN3 [Fragaria vesca subsp. vesca]	2.93	1.55074	2.35458e-07	8.09397e-06	yes	up
FxaC_28g34560	FxaC_28g34560	PREDICTED: uncharacterized protein LOC101309290 isoform X1 [Fragaria vesca subsp. vesca]	2.25	1.16972	2.36645e-07	8.12987e-06	yes	up
FxaC_2g33680	FxaC_2g33680	PREDICTED: probable xyloglucan endotransglucosylase/hydrolase protein 23 [Fragaria vesca subsp. vesca]	0.179	-2.47969	2.37194e-07	8.14384e-06	yes	down
FxaC_1g13110	FxaC_1g13110	PREDICTED: snakin-2-like [Fragaria vesca subsp. vesca]	0.201	-2.31287	2.37678e-07	8.15371e-06	yes	down
FxaC_10g45540	FxaC_10g45540	PREDICTED: peroxidase 4-like [Fragaria vesca subsp. vesca]	4.765	2.25253	2.37803e-07	8.15371e-06	yes	up
FxaC_20g24140	FxaC_20g24140	PREDICTED: glycine-rich cell wall structural protein 1.8 [Fragaria vesca subsp. vesca]	0.196	-2.34938	2.37982e-07	8.15371e-06	yes	down
FxaC_10g33390	FxaC_10g33390	PREDICTED: pleiotropic drug resistance protein 2-like [Fragaria vesca subsp. vesca]	2.061	1.04343	2.41211e-07	8.25207e-06	yes	up
FxaC_19g09590	FxaC_19g09590	PREDICTED: alpha-mannosidase-like isoform X2 [Fragaria vesca subsp. vesca]	2.035	1.02532	2.42745e-07	8.29959e-06	yes	up
FxaC_1g05500	FxaC_1g05500	PREDICTED: cysteine-rich receptor-like protein kinase 7 isoform X1 [Fragaria vesca subsp. vesca]	2.144	1.10012	2.43597e-07	8.32374e-06	yes	up
FxaC_23g23480	FxaC_23g23480	50S ribosomal protein L2 [Morus notabilis]	0.06	-4.05392	2.44535e-07	8.34391e-06	yes	down
FxaC_24g21970	FxaC_24g21970	PREDICTED: RING finger and CHY zinc finger domain-containing protein 1 [Fragaria vesca subsp. vesca]	0.241	-2.0523	2.46707e-07	8.40491e-06	yes	down
FxaC_21g38810	FxaC_21g38810	PREDICTED: polygalacturonase inhibitor [Fragaria vesca subsp. vesca]	0.068	-3.87912	2.49435e-07	8.4928e-06	yes	down
FxaC_24g54960	FxaC_24g54960	PREDICTED: F-box/kelch-repeat protein At3g06240-like [Fragaria vesca subsp. vesca]	0.495	-1.01463	2.52227e-07	8.57768e-06	yes	down
FxaC_24g29080	FxaC_24g29080	PREDICTED: uncharacterized protein C4orf29 homolog [Fragaria vesca subsp. vesca]	0.462	-1.11339	2.52586e-07	8.58477e-06	yes	down
FxaC_26g16710	FxaC_26g16710	PREDICTED: uncharacterized protein LOC101309494 [Fragaria vesca subsp. vesca]	0.49	-1.03021	2.54194e-07	8.6343e-06	yes	down
FxaC_13g02890	FxaC_13g02890	PREDICTED: UDP-glycosyltransferase 74B1-like [Fragaria vesca subsp. vesca]	0.2	-2.31977	2.55414e-07	8.67059e-06	yes	down
FxaC_3g07880	FxaC_3g07880	PREDICTED: putative transcription factor bHLH041 [Fragaria vesca subsp. vesca]	4.615	2.20632	2.57027e-07	8.71502e-06	yes	up
FxaC_21g16330	FxaC_21g16330	PREDICTED: receptor-like protein 12 [Fragaria vesca subsp. vesca]	2.535	1.3418	2.58108e-07	8.74648e-06	yes	up
FxaC_2g06520	FxaC_2g06520	PREDICTED: leucine-rich repeat extensin-like protein 4 [Fragaria vesca subsp. vesca]	0.347	-1.52732	2.58569e-07	8.75693e-06	yes	down
FxaC_23g60800	FxaC_23g60800	PREDICTED: 36.4 kDa proline-rich protein [Fragaria vesca subsp. vesca]	0.401	-1.31682	2.60333e-07	8.80103e-06	yes	down
FxaC_27g47040	FxaC_27g47040	PREDICTED: uncharacterized protein LOC101308274 isoform X1 [Fragaria vesca subsp. vesca]	2.121	1.08479	2.62888e-07	8.88218e-06	yes	up
FxaC_28g21780	FxaC_28g21780	PREDICTED: putative UDP-rhamnose:rhamnosyltransferase 1 [Fragaria vesca subsp. vesca]	9.619	3.26583	2.63802e-07	8.90254e-06	yes	up
FxaC_7g38550	FxaC_7g38550	PREDICTED: probable xyloglucan glycosyltransferase 5 [Fragaria vesca subsp. vesca]	0.455	-1.13459	2.64376e-07	8.91664e-06	yes	down
FxaC_25g34390	FxaC_25g34390	PREDICTED: uncharacterized protein LOC101307620 [Fragaria vesca subsp. vesca]	0.355	-1.49415	2.65581e-07	8.95204e-06	yes	down
FxaC_15g04500	FxaC_15g04500	PREDICTED: F-box/kelch-repeat protein At1g23390 [Fragaria vesca subsp. vesca]	4.492	2.16744	2.65848e-07	8.95575e-06	yes	up
FxaC_21g65680	FxaC_21g65680	PREDICTED: uncharacterized protein LOC104435162 [Eucalyptus grandis]	0.035	-4.84334	2.67316e-07	8.99459e-06	yes	down
FxaC_21g30360	FxaC_21g30360	PREDICTED: small subunit processome component 20 homolog isoform X1 [Fragaria vesca subsp. vesca]	2.054	1.03874	2.69252e-07	9.05442e-06	yes	up
FxaC_10g00430	FxaC_10g00430	PREDICTED: xyloglucan endotransglucosylase/hydrolase 2-like [Fragaria vesca subsp. vesca]	0.092	-3.43616	2.72803e-07	9.16846e-06	yes	down
FxaC_28g28490	FxaC_28g28490	PREDICTED: pentatricopeptide repeat-containing protein At1g02060, chloroplastic [Fragaria vesca subsp. vesca]	2.57	1.36174	2.74623e-07	9.22421e-06	yes	up
FxaC_14g36740	FxaC_14g36740	PREDICTED: serine carboxypeptidase-like 13 [Fragaria vesca subsp. vesca]	0.164	-2.60769	2.78008e-07	9.33242e-06	yes	down
FxaC_17g26520	FxaC_17g26520	PREDICTED: 50S ribosomal protein L19, chloroplastic [Fragaria vesca subsp. vesca]	0.449	-1.15587	2.82414e-07	9.46924e-06	yes	down
FxaC_21g35610	FxaC_21g35610	PREDICTED: basic leucine zipper 34 [Fragaria vesca subsp. vesca]	0.206	-2.27595	2.84734e-07	9.54142e-06	yes	down
FxaC_5g40840	FxaC_5g40840	PREDICTED: UDP-glycosyltransferase 74F2-like [Fragaria vesca subsp. vesca]	0.246	-2.02267	2.88043e-07	9.64666e-06	yes	down
FxaC_17g08970	FxaC_17g08970	PREDICTED: high-affinity nitrate transporter 3.2-like [Fragaria vesca subsp. vesca]	2.615	1.38703	2.88413e-07	9.6534e-06	yes	up
FxaC_22g10140	FxaC_22g10140	putative photosystem II Pbs27 [Rosa chinensis]	0.466	-1.10149	2.90571e-07	9.70859e-06	yes	down
FxaC_7g33100	FxaC_7g33100	PREDICTED: uncharacterized protein LOC105349843 [Fragaria vesca subsp. vesca]	0.293	-1.77207	3.01165e-07	1.00333e-05	yes	down
FxaC_25g52230	FxaC_25g52230	PREDICTED: FK506-binding protein 4-like [Fragaria vesca subsp. vesca]	2.013	1.00962	3.01431e-07	1.00363e-05	yes	up
FxaC_19g31850	FxaC_19g31850	PREDICTED: 3-dehydrosphinganine reductase TSC10A-like [Fragaria vesca subsp. vesca]	0.463	-1.11203	3.02485e-07	1.00655e-05	yes	down
FxaC_7g34850	FxaC_7g34850	PREDICTED: zinc finger protein ZAT10 [Fragaria vesca subsp. vesca]	2.418	1.27377	3.20821e-07	1.06201e-05	yes	up
FxaC_17g12820	FxaC_17g12820	PREDICTED: uncharacterized protein LOC101292707 [Fragaria vesca subsp. vesca]	0.423	-1.24108	3.23172e-07	1.06918e-05	yes	down
FxaC_7g23940	FxaC_7g23940	PREDICTED: uncharacterized protein LOC101299256 [Fragaria vesca subsp. vesca]	2.766	1.46798	3.341e-07	1.10406e-05	yes	up
FxaC_22g51700	FxaC_22g51700	PREDICTED: uncharacterized protein LOC101304113 [Fragaria vesca subsp. vesca]	0.339	-1.56232	3.34355e-07	1.10426e-05	yes	down
FxaC_24g40070	FxaC_24g40070	PREDICTED: aquaporin TIP2-1 [Fragaria vesca subsp. vesca]	0.362	-1.46515	3.36301e-07	1.11005e-05	yes	down
FxaC_9g38690	FxaC_9g38690	PREDICTED: probable glutathione S-transferase [Fragaria vesca subsp. vesca]	2.099	1.06963	3.39997e-07	1.1216e-05	yes	up
FxaC_24g10630	FxaC_24g10630	PREDICTED: uncharacterized protein LOC101307509 [Fragaria vesca subsp. vesca]	0.474	-1.0779	3.40238e-07	1.12175e-05	yes	down
FxaC_21g70240	FxaC_21g70240	PREDICTED: uncharacterized protein LOC101312646 [Fragaria vesca subsp. vesca]	0.45	-1.15064	3.41644e-07	1.12573e-05	yes	down
FxaC_6g02490	FxaC_6g02490	PREDICTED: UDP-glycosyltransferase 74E1-like [Fragaria vesca subsp. vesca]	0.406	-1.30104	3.445e-07	1.13319e-05	yes	down
FxaC_10g04270	FxaC_10g04270	putative protein kinase RLK-Pelle-DLSV family [Rosa chinensis]	2.081	1.05701	3.45706e-07	1.1365e-05	yes	up
FxaC_2g00100	FxaC_2g00100	PREDICTED: pectinesterase/pectinesterase inhibitor PPE8B-like [Fragaria vesca subsp. vesca]	0.182	-2.45913	3.46285e-07	1.13775e-05	yes	down
FxaC_1g27630	FxaC_1g27630	PREDICTED: UDP-galactose transporter 2 [Fragaria vesca subsp. vesca]	0.467	-1.09885	3.49045e-07	1.14616e-05	yes	down
FxaC_20g02560	FxaC_20g02560	PREDICTED: tubulin beta chain-like [Fragaria vesca subsp. vesca]	0.331	-1.59574	3.55709e-07	1.16604e-05	yes	down
FxaC_23g49340	FxaC_23g49340	PREDICTED: metalloendoproteinase 1-like [Fragaria vesca subsp. vesca]	7.687	2.94243	3.58294e-07	1.17317e-05	yes	up
FxaC_9g13580	FxaC_9g13580	PREDICTED: ankyrin repeat-containing protein At5g02620-like [Fragaria vesca subsp. vesca]	2.326	1.21756	3.58721e-07	1.17389e-05	yes	up
FxaC_25g32500	FxaC_25g32500	PREDICTED: FK506-binding protein 4 [Fragaria vesca subsp. vesca]	0.438	-1.19159	3.60153e-07	1.17723e-05	yes	down
FxaC_13g27570	FxaC_13g27570	PREDICTED: RING-H2 finger protein ATL2 [Fragaria vesca subsp. vesca]	2.656	1.40929	3.60811e-07	1.17853e-05	yes	up
FxaC_18g25220	FxaC_18g25220	PREDICTED: RING-H2 finger protein ATL22-like isoform X1 [Fragaria vesca subsp. vesca]	2.135	1.0943	3.6096e-07	1.17853e-05	yes	up
FxaC_11g23610	FxaC_11g23610	PREDICTED: glycine-rich cell wall structural protein-like [Fragaria vesca subsp. vesca]	0.062	-4.02101	3.65138e-07	1.19149e-05	yes	down
FxaC_28g21170	FxaC_28g21170	PREDICTED: putative UDP-rhamnose:rhamnosyltransferase 1 isoform X1 [Fragaria vesca subsp. vesca]	0.213	-2.22952	3.68854e-07	1.20293e-05	yes	down
FxaC_10g31060	FxaC_10g31060	PREDICTED: non-specific phospholipase C2 [Fragaria vesca subsp. vesca]	0.189	-2.40088	3.73374e-07	1.21697e-05	yes	down
FxaC_22g54980	FxaC_22g54980	PREDICTED: protein NRT1/ PTR FAMILY 5.6 [Fragaria vesca subsp. vesca]	0.383	-1.38457	3.74407e-07	1.21965e-05	yes	down
FxaC_2g05190	FxaC_2g05190	-	3.672	1.87671	3.75177e-07	1.22146e-05	yes	up
FxaC_3g11800	FxaC_3g11800	chitinase [Fragaria x ananassa]	5.943	2.57113	3.77285e-07	1.22693e-05	yes	up
FxaC_10g48240	FxaC_10g48240	PREDICTED: WEB family protein At5g55860 [Fragaria vesca subsp. vesca]	2.133	1.09311	3.77924e-07	1.22761e-05	yes	up
FxaC_19g25900	FxaC_19g25900	PREDICTED: putative DNA-binding protein ESCAROLA [Fragaria vesca subsp. vesca]	2.54	1.34486	3.78482e-07	1.22872e-05	yes	up
FxaC_1g14170	FxaC_1g14170	PREDICTED: ocs element-binding factor 1-like [Fragaria vesca subsp. vesca]	0.126	-2.98321	3.82383e-07	1.23858e-05	yes	down
FxaC_9g48110	FxaC_9g48110	PREDICTED: GDSL esterase/lipase At1g29670-like [Fragaria vesca subsp. vesca]	0.127	-2.97147	3.84827e-07	1.24579e-05	yes	down
FxaC_13g36890	FxaC_13g36890	PREDICTED: xyloglucan 6-xylosyltransferase 2-like [Fragaria vesca subsp. vesca]	0.43	-1.21606	3.86332e-07	1.24925e-05	yes	down
FxaC_28g22930	FxaC_28g22930	hypothetical protein PanWU01x14_192820 [Parasponia andersonii]	6.487	2.69747	3.92027e-07	1.26552e-05	yes	up
FxaC_6g45750	FxaC_6g45750	PREDICTED: probable galacturonosyltransferase-like 1 [Fragaria vesca subsp. vesca]	2.591	1.37339	3.93892e-07	1.27082e-05	yes	up
FxaC_23g19290	FxaC_23g19290	PREDICTED: receptor-like protein 12 [Fragaria vesca subsp. vesca]	3.197	1.67686	3.95615e-07	1.27566e-05	yes	up
FxaC_12g21300	FxaC_12g21300	PREDICTED: probable cytokinin riboside 5'-monophosphate phosphoribohydrolase LOGL10 [Fragaria vesca subsp. vesca]	0.475	-1.07456	3.97923e-07	1.28238e-05	yes	down
FxaC_3g07560	FxaC_3g07560	PREDICTED: transmembrane protein 258 [Fragaria vesca subsp. vesca]	0.162	-2.62403	4.00753e-07	1.29078e-05	yes	down
FxaC_28g15960	FxaC_28g15960	PREDICTED: protein IN2-1 homolog B-like [Fragaria vesca subsp. vesca]	0.113	-3.1501	4.07853e-07	1.31143e-05	yes	down
FxaC_17g33860	FxaC_17g33860	PREDICTED: protein NLP5-like isoform X2 [Fragaria vesca subsp. vesca]	2.012	1.0084	4.11851e-07	1.32352e-05	yes	up
FxaC_12g37490	FxaC_12g37490	PREDICTED: myb-like protein P [Fragaria vesca subsp. vesca]	2.908	1.53981	4.12076e-07	1.32352e-05	yes	up
FxaC_23g47110	FxaC_23g47110	PREDICTED: probable galactinol--sucrose galactosyltransferase 5 [Fragaria vesca subsp. vesca]	5.576	2.47919	4.25256e-07	1.3628e-05	yes	up
FxaC_5g25110	FxaC_5g25110	TMV resistance protein N-like isoform X2 [Rosa chinensis]	0.244	-2.03448	4.26928e-07	1.36662e-05	yes	down
FxaC_4g29490	FxaC_4g29490	PREDICTED: dirigent protein 23-like [Fragaria vesca subsp. vesca]	2.033	1.02356	4.27281e-07	1.36699e-05	yes	up
FxaC_25g60580	FxaC_25g60580	PREDICTED: S-type anion channel SLAH2-like isoform X1 [Fragaria vesca subsp. vesca]	3.657	1.87053	4.30173e-07	1.37547e-05	yes	up
FxaC_17g06360	FxaC_17g06360	PREDICTED: uncharacterized protein LOC105351441 [Fragaria vesca subsp. vesca]	3.07	1.61823	4.52117e-07	1.44241e-05	yes	up
FxaC_7g33950	FxaC_7g33950	PREDICTED: branched-chain-amino-acid aminotransferase 5, chloroplastic-like [Fragaria vesca subsp. vesca]	3.694	1.88509	4.59242e-07	1.46216e-05	yes	up
FxaC_11g29110	FxaC_11g29110	PREDICTED: uncharacterized protein LOC101292284 isoform X1 [Fragaria vesca subsp. vesca]	2.391	1.2579	4.6226e-07	1.47067e-05	yes	up
FxaC_19g40300	FxaC_19g40300	PREDICTED: TMV resistance protein N-like isoform X1 [Fragaria vesca subsp. vesca]	2.699	1.43236	4.64556e-07	1.47716e-05	yes	up
FxaC_16g06440	FxaC_16g06440	PREDICTED: probable xyloglucan endotransglucosylase/hydrolase protein 23 [Fragaria vesca subsp. vesca]	0.184	-2.43934	4.65127e-07	1.47815e-05	yes	down
FxaC_6g36560	FxaC_6g36560	PREDICTED: probable plastid-lipid-associated protein 8, chloroplastic [Fragaria vesca subsp. vesca]	0.472	-1.08316	4.7575e-07	1.51024e-05	yes	down
FxaC_21g47520	FxaC_21g47520	PREDICTED: calcium-transporting ATPase 8, plasma membrane-type-like [Fragaria vesca subsp. vesca]	22.88	4.51604	4.8327e-07	1.53326e-05	yes	up
FxaC_14g04170	FxaC_14g04170	PREDICTED: heat stress transcription factor A-8 isoform X1 [Fragaria vesca subsp. vesca]	2.327	1.21829	4.90741e-07	1.55437e-05	yes	up
FxaC_5g27330	FxaC_5g27330	PREDICTED: laccase-14-like isoform X2 [Fragaria vesca subsp. vesca]	0.033	-4.9209	4.91704e-07	1.55656e-05	yes	down
FxaC_11g47940	FxaC_11g47940	PREDICTED: kinesin-like protein KIF21A isoform X2 [Fragaria vesca subsp. vesca]	0.425	-1.23543	4.97525e-07	1.57238e-05	yes	down
FxaC_20g09180	FxaC_20g09180	PREDICTED: glutamic acid-rich protein-like [Fragaria vesca subsp. vesca]	2.219	1.14999	5.06094e-07	1.59682e-05	yes	up
FxaC_2g13450	FxaC_2g13450	PREDICTED: auxin-binding protein ABP19a-like [Fragaria vesca subsp. vesca]	0.452	-1.14628	5.10786e-07	1.60808e-05	yes	down
FxaC_9g24010	FxaC_9g24010	PREDICTED: lysosomal beta glucosidase-like [Fragaria vesca subsp. vesca]	0.406	-1.29896	5.11109e-07	1.60821e-05	yes	down
FxaC_21g24950	FxaC_21g24950	PREDICTED: cytochrome P450 71A1-like [Fragaria vesca subsp. vesca]	2.068	1.04839	5.13027e-07	1.61336e-05	yes	up
FxaC_22g49150	FxaC_22g49150	PREDICTED: lactosylceramide 4-alpha-galactosyltransferase-like [Fragaria vesca subsp. vesca]	0.313	-1.67762	5.16813e-07	1.62437e-05	yes	down
FxaC_26g23380	FxaC_26g23380	PREDICTED: BURP domain-containing protein 3-like [Fragaria vesca subsp. vesca]	3.214	1.68442	5.19059e-07	1.63053e-05	yes	up
FxaC_6g20740	FxaC_6g20740	PREDICTED: 3-hydroxy-3-methylglutaryl-coenzyme A reductase 1-like [Fragaria vesca subsp. vesca]	5.686	2.50739	5.21574e-07	1.63754e-05	yes	up
FxaC_6g44860	FxaC_6g44860	PREDICTED: glucose-1-phosphate adenylyltransferase large subunit 1-like [Fragaria vesca subsp. vesca]	2.463	1.30035	5.22802e-07	1.63837e-05	yes	up
FxaC_21g17460	FxaC_21g17460	PREDICTED: putative laccase-9 [Fragaria vesca subsp. vesca]	0.016	-6.00656	5.22985e-07	1.63837e-05	yes	down
FxaC_12g43490	FxaC_12g43490	PREDICTED: GDSL esterase/lipase At1g29670-like [Fragaria vesca subsp. vesca]	0.099	-3.34345	5.27842e-07	1.65088e-05	yes	down
FxaC_15g08640	FxaC_15g08640	PREDICTED: uncharacterized protein LOC101298512 [Fragaria vesca subsp. vesca]	0.256	-1.96809	5.48176e-07	1.71167e-05	yes	down
FxaC_24g15540	FxaC_24g15540	PREDICTED: AMP deaminase [Fragaria vesca subsp. vesca]	2.061	1.04358	5.52359e-07	1.72379e-05	yes	up
FxaC_7g05320	FxaC_7g05320	PREDICTED: uncharacterized protein LOC101303079 [Fragaria vesca subsp. vesca]	0.359	-1.47611	5.69185e-07	1.77147e-05	yes	down
FxaC_3g27560	FxaC_3g27560	PREDICTED: G-type lectin S-receptor-like serine/threonine-protein kinase RLK1 [Fragaria vesca subsp. vesca]	2.411	1.26934	5.73962e-07	1.78246e-05	yes	up
FxaC_24g49370	FxaC_24g49370	PREDICTED: fasciclin-like arabinogalactan protein 2 [Fragaria vesca subsp. vesca]	0.489	-1.03239	5.75091e-07	1.785e-05	yes	down
FxaC_25g42380	FxaC_25g42380	PREDICTED: uncharacterized protein LOC101301617 [Fragaria vesca subsp. vesca]	2.499	1.32123	5.75605e-07	1.78562e-05	yes	up
FxaC_26g20160	FxaC_26g20160	PREDICTED: cytochrome P450 78A9-like [Fragaria vesca subsp. vesca]	5.152	2.36501	5.77715e-07	1.7912e-05	yes	up
FxaC_6g16340	FxaC_6g16340	PREDICTED: F-box protein At2g32560-like [Fragaria vesca subsp. vesca]	0.479	-1.06302	5.81207e-07	1.80105e-05	yes	down
FxaC_18g06760	FxaC_18g06760	uncharacterized protein LOC112165977 isoform X1 [Rosa chinensis]	0.458	-1.12736	5.98297e-07	1.852e-05	yes	down
FxaC_10g23290	FxaC_10g23290	PREDICTED: G-type lectin S-receptor-like serine/threonine-protein kinase At4g27290 [Fragaria vesca subsp. vesca]	2.07	1.04969	6.01811e-07	1.86087e-05	yes	up
FxaC_21g55040	FxaC_21g55040	PREDICTED: glycerol-3-phosphate 2-O-acyltransferase 6 [Fragaria vesca subsp. vesca]	0.337	-1.57131	6.04025e-07	1.8667e-05	yes	down
FxaC_18g38410	FxaC_18g38410	PREDICTED: probable inactive leucine-rich repeat receptor-like protein kinase At3g03770 [Fragaria vesca subsp. vesca]	0.401	-1.31773	6.05467e-07	1.86914e-05	yes	down
FxaC_10g20880	FxaC_10g20880	basic leucine zipper 34-like [Rosa chinensis]	0.073	-3.7728	6.08814e-07	1.87739e-05	yes	down
FxaC_19g34300	FxaC_19g34300	PREDICTED: amino acid permease 6-like [Fragaria vesca subsp. vesca]	0.343	-1.54407	6.13193e-07	1.88689e-05	yes	down
FxaC_5g07770	FxaC_5g07770	PREDICTED: uncharacterized protein LOC101291591 [Fragaria vesca subsp. vesca]	2.067	1.04774	6.21348e-07	1.9089e-05	yes	up
FxaC_24g11140	FxaC_24g11140	PREDICTED: GTP-binding protein SAR1A-like [Fragaria vesca subsp. vesca]	0.47	-1.08967	6.28352e-07	1.92835e-05	yes	down
FxaC_9g08190	FxaC_9g08190	-	127.939	6.99932	6.29641e-07	1.93127e-05	yes	up
FxaC_9g03150	FxaC_9g03150	PREDICTED: G-type lectin S-receptor-like serine/threonine-protein kinase RLK1 [Fragaria vesca subsp. vesca]	5.75	2.52352	6.33357e-07	1.94163e-05	yes	up
FxaC_22g49520	FxaC_22g49520	PREDICTED: WD repeat-containing protein 3 [Fragaria vesca subsp. vesca]	2.455	1.2955	6.34951e-07	1.94494e-05	yes	up
FxaC_11g35080	FxaC_11g35080	putative chloroplast RF2 (plastid) [Fragaria viridis]	0.098	-3.3491	6.40283e-07	1.95866e-05	yes	down
FxaC_12g16650	FxaC_12g16650	PREDICTED: nuclear transcription factor Y subunit B-3-like [Fragaria vesca subsp. vesca]	0.434	-1.2047	6.40656e-07	1.95876e-05	yes	down
FxaC_12g43430	FxaC_12g43430	PREDICTED: shikimate O-hydroxycinnamoyltransferase-like [Fragaria vesca subsp. vesca]	0.434	-1.2057	6.44664e-07	1.96996e-05	yes	down
FxaC_7g41910	FxaC_7g41910	PREDICTED: glucose-1-phosphate adenylyltransferase large subunit 1-like [Fragaria vesca subsp. vesca]	2.08	1.05661	6.50619e-07	1.98498e-05	yes	up
FxaC_16g29050	FxaC_16g29050	PREDICTED: probable receptor-like protein kinase At5g39030 [Fragaria vesca subsp. vesca]	3.345	1.74196	6.54481e-07	1.99474e-05	yes	up
FxaC_21g28160	FxaC_21g28160	PREDICTED: auxin-responsive protein IAA26-like [Fragaria vesca subsp. vesca]	2.285	1.1921	6.59701e-07	2.0084e-05	yes	up
FxaC_10g46460	FxaC_10g46460	PREDICTED: probable inactive receptor kinase At5g58300 [Fragaria vesca subsp. vesca]	0.488	-1.03597	6.60969e-07	2.00957e-05	yes	down
FxaC_12g27670	FxaC_12g27670	PREDICTED: putative receptor-like protein kinase At4g00960 isoform X2 [Fragaria vesca subsp. vesca]	3.855	1.94692	6.61137e-07	2.00957e-05	yes	up
FxaC_24g06360	FxaC_24g06360	PREDICTED: translational activator GCN1 [Fragaria vesca subsp. vesca]	2.089	1.06278	6.64867e-07	2.01983e-05	yes	up
FxaC_22g05680	FxaC_22g05680	PREDICTED: probable receptor-like protein kinase At5g15080 isoform X3 [Fragaria vesca subsp. vesca]	0.039	-4.66435	6.68995e-07	2.03022e-05	yes	down
FxaC_21g23300	FxaC_21g23300	PREDICTED: RING-H2 finger protein ATL3-like [Fragaria vesca subsp. vesca]	2.705	1.43553	6.72755e-07	2.03731e-05	yes	up
FxaC_13g30520	FxaC_13g30520	PREDICTED: probable receptor protein kinase TMK1 [Fragaria vesca subsp. vesca]	0.388	-1.36571	6.78437e-07	2.05343e-05	yes	down
FxaC_5g06950	FxaC_5g06950	hypothetical protein LSAT_3X112740 [Lactuca sativa]	0.138	-2.85789	6.82409e-07	2.06436e-05	yes	down
FxaC_11g39290	FxaC_11g39290	PREDICTED: chlorophyll a-b binding protein of LHCII type 1-like [Fragaria vesca subsp. vesca]	0.438	-1.19235	6.94301e-07	2.09701e-05	yes	down
FxaC_5g40530	FxaC_5g40530	PREDICTED: serine carboxypeptidase-like 18 [Fragaria vesca subsp. vesca]	0.087	-3.51724	6.99949e-07	2.11295e-05	yes	down
FxaC_23g07600	FxaC_23g07600	PREDICTED: uncharacterized protein LOC105352529 [Fragaria vesca subsp. vesca]	0.259	-1.9517	7.01582e-07	2.11677e-05	yes	down
FxaC_7g26910	FxaC_7g26910	PREDICTED: LOW QUALITY PROTEIN: flavonol synthase/flavanone 3-hydroxylase-like [Fragaria vesca subsp. vesca]	0.022	-5.47729	7.02774e-07	2.11925e-05	yes	down
FxaC_22g64800	FxaC_22g64800	PREDICTED: receptor-like protein 12 isoform X3 [Fragaria vesca subsp. vesca]	4.008	2.00277	7.10928e-07	2.14045e-05	yes	up
FxaC_24g42850	FxaC_24g42850	PREDICTED: nuclear transcription factor Y subunit A-3 [Fragaria vesca subsp. vesca]	2.125	1.08736	7.1488e-07	2.15082e-05	yes	up
FxaC_8g05910	FxaC_8g05910	PREDICTED: uncharacterized protein LOC101301072 [Fragaria vesca subsp. vesca]	2.733	1.45025	7.22353e-07	2.16693e-05	yes	up
FxaC_11g42430	FxaC_11g42430	PREDICTED: expansin-A4-like [Fragaria vesca subsp. vesca]	0.357	-1.4865	7.22373e-07	2.16693e-05	yes	down
FxaC_8g22560	FxaC_8g22560	Amino acid transporter, transmembrane [Corchorus capsularis]	2.763	1.46642	7.24514e-07	2.17221e-05	yes	up
FxaC_15g06970	FxaC_15g06970	PREDICTED: heparanase-like protein 2 [Fragaria vesca subsp. vesca]	0.356	-1.48956	7.25268e-07	2.17334e-05	yes	down
FxaC_7g01670	FxaC_7g01670	hypothetical protein JCGZ_09851 [Jatropha curcas]	25.645	4.68058	7.36456e-07	2.2011e-05	yes	up
FxaC_18g30790	FxaC_18g30790	hypothetical protein PanWU01x14_174990 [Parasponia andersonii]	0.15	-2.7393	7.38187e-07	2.20512e-05	yes	down
FxaC_19g20640	FxaC_19g20640	PREDICTED: protein NRT1/ PTR FAMILY 7.3 [Fragaria vesca subsp. vesca]	2.618	1.38822	7.54231e-07	2.24718e-05	yes	up
FxaC_1g10410	FxaC_1g10410	PREDICTED: pectinesterase/pectinesterase inhibitor PPE8B-like [Fragaria vesca subsp. vesca]	0.405	-1.30561	7.56093e-07	2.25039e-05	yes	down
FxaC_19g40050	FxaC_19g40050	PREDICTED: transcription factor TGA7-like isoform X1 [Fragaria vesca subsp. vesca]	2.367	1.24279	7.57299e-07	2.25281e-05	yes	up
FxaC_28g26720	FxaC_28g26720	NADH-plastoquinone oxidoreductase subunit 1 (plastid) [Comarum salesovianum]	0.069	-3.85089	7.67747e-07	2.2827e-05	yes	down
FxaC_13g07230	FxaC_13g07230	PREDICTED: uncharacterized protein LOC101305364 [Fragaria vesca subsp. vesca]	2.65	1.40596	7.73478e-07	2.29855e-05	yes	up
FxaC_20g09980	FxaC_20g09980	PREDICTED: E3 ubiquitin-protein ligase ORTHRUS 2-like [Fragaria vesca subsp. vesca]	4.16	2.05666	8.13157e-07	2.41145e-05	yes	up
FxaC_22g18130	FxaC_22g18130	PREDICTED: aquaporin TIP2-1 [Fragaria vesca subsp. vesca]	0.244	-2.0321	8.36649e-07	2.47301e-05	yes	down
FxaC_9g47050	FxaC_9g47050	putative protein kinase RLK-Pelle-LRR-XII-1 family [Rosa chinensis]	8.568	3.099	8.3694e-07	2.47301e-05	yes	up
FxaC_1g29210	FxaC_1g29210	PREDICTED: callose synthase 5 [Fragaria vesca subsp. vesca]	2.273	1.18463	8.38524e-07	2.47641e-05	yes	up
FxaC_19g10060	FxaC_19g10060	PREDICTED: respiratory burst oxidase homolog protein C [Fragaria vesca subsp. vesca]	2.21	1.14392	8.56201e-07	2.52471e-05	yes	up
FxaC_21g50050	FxaC_21g50050	PREDICTED: uncharacterized protein LOC101304113 [Fragaria vesca subsp. vesca]	0.468	-1.09556	8.58721e-07	2.53084e-05	yes	down
FxaC_6g36900	FxaC_6g36900	transcription factor MYB9 [Fragaria x ananassa]	4.121	2.04297	8.67683e-07	2.55594e-05	yes	up
FxaC_18g32040	FxaC_18g32040	PREDICTED: phosphoserine phosphatase, chloroplastic [Fragaria vesca subsp. vesca]	0.487	-1.03723	8.71443e-07	2.56437e-05	yes	down
FxaC_27g15790	FxaC_27g15790	PREDICTED: SPX domain-containing membrane protein At4g22990-like [Fragaria vesca subsp. vesca]	2.092	1.06465	8.82266e-07	2.59222e-05	yes	up
FxaC_26g15340	FxaC_26g15340	putative transferase, protein kinase RLK-Pelle-RLCK-VIIa-2 family [Rosa chinensis]	2.127	1.08866	9.15229e-07	2.68494e-05	yes	up
FxaC_9g37050	FxaC_9g37050	PREDICTED: protein trichome birefringence-like 41 [Fragaria vesca subsp. vesca]	0.241	-2.05429	9.19741e-07	2.69541e-05	yes	down
FxaC_10g45770	FxaC_10g45770	PREDICTED: expansin-A4-like [Fragaria vesca subsp. vesca]	0.332	-1.59181	9.25743e-07	2.70884e-05	yes	down
FxaC_26g03780	FxaC_26g03780	PREDICTED: TMV resistance protein N-like [Fragaria vesca subsp. vesca]	2.281	1.18948	9.26566e-07	2.70984e-05	yes	up
FxaC_24g56710	FxaC_24g56710	PREDICTED: protein ENHANCED DISEASE RESISTANCE 2 [Fragaria vesca subsp. vesca]	0.498	-1.0055	9.30851e-07	2.71823e-05	yes	down
FxaC_4g11800	FxaC_4g11800	PREDICTED: chromatin assembly factor 1 subunit FAS2 isoform X2 [Fragaria vesca subsp. vesca]	0.217	-2.20096	9.50175e-07	2.76901e-05	yes	down
FxaC_25g02000	FxaC_25g02000	PREDICTED: probable polyamine oxidase 5 [Fragaria vesca subsp. vesca]	0.301	-1.73288	9.65901e-07	2.81197e-05	yes	down
FxaC_24g11880	FxaC_24g11880	nodulin 26-like intrinsic protein [Fragaria chiloensis]	0.231	-2.11346	9.86396e-07	2.86581e-05	yes	down
FxaC_12g43780	FxaC_12g43780	PREDICTED: cold-regulated 413 inner membrane protein 2, chloroplastic-like isoform X2 [Fragaria vesca subsp. vesca]	0.493	-1.01968	1.00707e-06	2.92141e-05	yes	down
FxaC_26g24830	FxaC_26g24830	PREDICTED: BON1-associated protein 1 [Fragaria vesca subsp. vesca]	6.639	2.73091	1.00885e-06	2.92511e-05	yes	up
FxaC_13g32800	FxaC_13g32800	PREDICTED: protein NRT1/ PTR FAMILY 3.1-like [Fragaria vesca subsp. vesca]	0.407	-1.29627	1.01868e-06	2.94614e-05	yes	down
FxaC_25g46290	FxaC_25g46290	PREDICTED: cytochrome P450 714A1-like [Fragaria vesca subsp. vesca]	0.406	-1.30024	1.02423e-06	2.9607e-05	yes	down
FxaC_18g26940	FxaC_18g26940	PREDICTED: probable cyclic nucleotide-gated ion channel 20, chloroplastic [Fragaria vesca subsp. vesca]	2.016	1.01122	1.02653e-06	2.96439e-05	yes	up
FxaC_27g15870	FxaC_27g15870	PREDICTED: UDP-galactose/UDP-glucose transporter 2-like [Fragaria vesca subsp. vesca]	2.744	1.45613	1.02654e-06	2.96439e-05	yes	up
FxaC_24g57850	FxaC_24g57850	PREDICTED: tubulin alpha-2 chain-like [Fragaria vesca subsp. vesca]	0.482	-1.05395	1.03816e-06	2.99341e-05	yes	down
FxaC_23g11870	FxaC_23g11870	PREDICTED: protein ASPARTIC PROTEASE IN GUARD CELL 2-like [Fragaria vesca subsp. vesca]	2.058	1.04149	1.05301e-06	3.02934e-05	yes	up
FxaC_23g47530	FxaC_23g47530	PREDICTED: uncharacterized protein LOC105352542 [Fragaria vesca subsp. vesca]	2.711	1.4389	1.06242e-06	3.05413e-05	yes	up
FxaC_28g01800	FxaC_28g01800	PREDICTED: molybdate-anion transporter [Fragaria vesca subsp. vesca]	0.446	-1.16634	1.06418e-06	3.05763e-05	yes	down
FxaC_8g35140	FxaC_8g35140	ATP synthase subunit 6, partial (mitochondrion) [Fragaria mandshurica]	0.225	-2.15362	1.08343e-06	3.10527e-05	yes	down
FxaC_6g01920	FxaC_6g01920	PREDICTED: squalene monooxygenase-like [Fragaria vesca subsp. vesca]	2.856	1.51417	1.08347e-06	3.10527e-05	yes	up
FxaC_5g20710	FxaC_5g20710	PREDICTED: CMP-sialic acid transporter 4 [Fragaria vesca subsp. vesca]	0.463	-1.10954	1.11342e-06	3.18316e-05	yes	down
FxaC_12g19320	FxaC_12g19320	PREDICTED: low molecular weight phosphotyrosine protein phosphatase [Fragaria vesca subsp. vesca]	0.427	-1.22613	1.12787e-06	3.21643e-05	yes	down
FxaC_18g06160	FxaC_18g06160	PREDICTED: uncharacterized protein LOC101293000 [Fragaria vesca subsp. vesca]	0.47	-1.09019	1.13374e-06	3.22996e-05	yes	down
FxaC_7g04850	FxaC_7g04850	PREDICTED: 2-hydroxyisoflavanone dehydratase-like [Fragaria vesca subsp. vesca]	0.209	-2.25956	1.14183e-06	3.25137e-05	yes	down
FxaC_3g31570	FxaC_3g31570	-	4.453	2.15475	1.15243e-06	3.27994e-05	yes	up
FxaC_13g04200	FxaC_13g04200	PREDICTED: glycerophosphodiester phosphodiesterase protein kinase domain-containing GDPDL2-like [Fragaria vesca subsp. vesca]	2.522	1.33483	1.18099e-06	3.35287e-05	yes	up
FxaC_26g11590	FxaC_26g11590	PREDICTED: uncharacterized protein LOC101305600 [Fragaria vesca subsp. vesca]	0.32	-1.6429	1.19085e-06	3.37921e-05	yes	down
FxaC_16g25610	FxaC_16g25610	PREDICTED: cyclic dof factor 3 [Fragaria vesca subsp. vesca]	3.899	1.96313	1.19243e-06	3.38199e-05	yes	up
FxaC_15g19140	FxaC_15g19140	PREDICTED: rapid alkalinization factor [Fragaria vesca subsp. vesca]	0.489	-1.03256	1.19679e-06	3.39268e-05	yes	down
FxaC_9g31690	FxaC_9g31690	PREDICTED: putative receptor-like protein kinase At4g00960 isoform X2 [Fragaria vesca subsp. vesca]	5.172	2.37078	1.19927e-06	3.39644e-05	yes	up
FxaC_13g43610	FxaC_13g43610	PREDICTED: lactation elevated protein 1 [Fragaria vesca subsp. vesca]	5.056	2.33794	1.1993e-06	3.39644e-05	yes	up
FxaC_14g19580	FxaC_14g19580	PREDICTED: major allergen Pru av 1-like [Fragaria vesca subsp. vesca]	2.308	1.20673	1.21133e-06	3.42712e-05	yes	up
FxaC_17g08550	FxaC_17g08550	PREDICTED: copper amine oxidase 1-like [Fragaria vesca subsp. vesca]	5.985	2.58147	1.22004e-06	3.44836e-05	yes	up
FxaC_2g30250	FxaC_2g30250	PREDICTED: transcription factor TGA4-like isoform X1 [Fragaria vesca subsp. vesca]	2.173	1.11967	1.22382e-06	3.45731e-05	yes	up
FxaC_13g27370	FxaC_13g27370	PREDICTED: ethylene-responsive transcription factor RAP2-3 [Fragaria vesca subsp. vesca]	2.908	1.53998	1.23473e-06	3.48642e-05	yes	up
FxaC_9g51240	FxaC_9g51240	PREDICTED: probable trehalose-phosphate phosphatase C isoform X1 [Fragaria vesca subsp. vesca]	0.009	-6.78871	1.26044e-06	3.55551e-05	yes	down
FxaC_9g51020	FxaC_9g51020	PREDICTED: cytokinin riboside 5'-monophosphate phosphoribohydrolase LOG3-like isoform X1 [Fragaria vesca subsp. vesca]	2.949	1.56038	1.26468e-06	3.56144e-05	yes	up
FxaC_9g38260	FxaC_9g38260	PREDICTED: uncharacterized protein LOC105350805 [Fragaria vesca subsp. vesca]	3.166	1.66272	1.26565e-06	3.56144e-05	yes	up
FxaC_10g47710	FxaC_10g47710	heavy metal-associated isoprenylated plant protein 47-like [Rosa chinensis]	6.397	2.67746	1.26661e-06	3.56237e-05	yes	up
FxaC_7g32430	FxaC_7g32430	PREDICTED: LRR receptor-like serine/threonine-protein kinase ERECTA [Fragaria vesca subsp. vesca]	0.494	-1.01728	1.27525e-06	3.57963e-05	yes	down
FxaC_16g03520	FxaC_16g03520	PREDICTED: putative protein phosphatase 2C-like protein 44 isoform X1 [Fragaria vesca subsp. vesca]	2.197	1.13553	1.28567e-06	3.60308e-05	yes	up
FxaC_16g25430	FxaC_16g25430	PREDICTED: NAC transcription factor 29-like [Fragaria vesca subsp. vesca]	2.879	1.52564	1.28612e-06	3.60308e-05	yes	up
FxaC_2g23600	FxaC_2g23600	PREDICTED: BTB/POZ and TAZ domain-containing protein 4 [Fragaria vesca subsp. vesca]	0.25	-2.00258	1.30766e-06	3.65805e-05	yes	down
FxaC_28g16750	FxaC_28g16750	PREDICTED: patatin-like protein 6 [Fragaria vesca subsp. vesca]	0.487	-1.03785	1.33242e-06	3.72004e-05	yes	down
FxaC_22g63110	FxaC_22g63110	probable serine/threonine-protein kinase PBL7 [Rosa chinensis]	0.291	-1.7815	1.33453e-06	3.72412e-05	yes	down
FxaC_10g05140	FxaC_10g05140	PREDICTED: putative methyltransferase DDB_G0268948 [Fragaria vesca subsp. vesca]	0.421	-1.24714	1.34978e-06	3.76301e-05	yes	down
FxaC_26g09850	FxaC_26g09850	PREDICTED: ethylene-responsive transcription factor 2-like [Fragaria vesca subsp. vesca]	2.257	1.17428	1.36495e-06	3.8018e-05	yes	up
FxaC_15g06470	FxaC_15g06470	PREDICTED: photosynthetic NDH subunit of lumenal location 2, chloroplastic [Fragaria vesca subsp. vesca]	0.461	-1.11722	1.366e-06	3.80191e-05	yes	down
FxaC_24g07730	FxaC_24g07730	PREDICTED: uncharacterized protein LOC101300067 [Fragaria vesca subsp. vesca]	3.497	1.80618	1.36859e-06	3.80533e-05	yes	up
FxaC_22g64250	FxaC_22g64250	PREDICTED: acyltransferase-like protein At1g54570, chloroplastic [Fragaria vesca subsp. vesca]	2.33	1.22025	1.36895e-06	3.80533e-05	yes	up
FxaC_25g01820	FxaC_25g01820	PREDICTED: phenolic glucoside malonyltransferase 2-like [Fragaria vesca subsp. vesca]	0.204	-2.29657	1.3823e-06	3.84057e-05	yes	down
FxaC_8g37610	FxaC_8g37610	PREDICTED: pathogenesis-related protein 1A-like [Fragaria vesca subsp. vesca]	5.734	2.51966	1.3915e-06	3.86239e-05	yes	up
FxaC_23g03160	FxaC_23g03160	PREDICTED: protein TIFY 11A-like [Fragaria vesca subsp. vesca]	3.083	1.62428	1.39889e-06	3.88008e-05	yes	up
FxaC_5g34100	FxaC_5g34100	PREDICTED: very-long-chain enoyl-CoA reductase-like [Fragaria vesca subsp. vesca]	0.419	-1.25624	1.4072e-06	3.89841e-05	yes	down
FxaC_12g02770	FxaC_12g02770	PREDICTED: multiple C2 and transmembrane domain-containing protein 1-like [Fragaria vesca subsp. vesca]	0.309	-1.69547	1.41184e-06	3.90918e-05	yes	down
FxaC_2g36390	FxaC_2g36390	PREDICTED: uncharacterized protein LOC101298068 [Fragaria vesca subsp. vesca]	2.539	1.34406	1.41314e-06	3.90918e-05	yes	up
FxaC_10g45710	FxaC_10g45710	PREDICTED: probable serine/threonine-protein kinase WNK4 [Fragaria vesca subsp. vesca]	2.568	1.36066	1.42874e-06	3.94854e-05	yes	up
FxaC_11g37710	FxaC_11g37710	PREDICTED: expansin-A6 [Fragaria vesca subsp. vesca]	0.356	-1.49069	1.4435e-06	3.98618e-05	yes	down
FxaC_15g30950	FxaC_15g30950	PREDICTED: probable receptor-like serine/threonine-protein kinase At5g57670 [Fragaria vesca subsp. vesca]	0.462	-1.11334	1.44376e-06	3.98618e-05	yes	down
FxaC_27g47880	FxaC_27g47880	PREDICTED: probable plastid-lipid-associated protein 14, chloroplastic [Fragaria vesca subsp. vesca]	0.116	-3.10215	1.45282e-06	4.00541e-05	yes	down
FxaC_9g50720	FxaC_9g50720	PREDICTED: cytokinin riboside 5'-monophosphate phosphoribohydrolase LOG3-like isoform X1 [Fragaria vesca subsp. vesca]	0.19	-2.39947	1.46613e-06	4.03628e-05	yes	down
FxaC_12g06080	FxaC_12g06080	PREDICTED: probable serine/threonine-protein kinase WNK4 [Fragaria vesca subsp. vesca]	2.508	1.3266	1.47445e-06	4.04771e-05	yes	up
FxaC_13g02670	FxaC_13g02670	PREDICTED: formin-like protein 8 [Fragaria vesca subsp. vesca]	0.419	-1.25415	1.48354e-06	4.06659e-05	yes	down
FxaC_2g32240	FxaC_2g32240	PREDICTED: G-type lectin S-receptor-like serine/threonine-protein kinase RLK1 [Fragaria vesca subsp. vesca]	3.806	1.92844	1.48521e-06	4.06922e-05	yes	up
FxaC_6g45850	FxaC_6g45850	PREDICTED: uncharacterized protein LOC101311938 [Fragaria vesca subsp. vesca]	2.51	1.32763	1.48652e-06	4.07085e-05	yes	up
FxaC_2g11840	FxaC_2g11840	PREDICTED: MLO-like protein 15 [Fragaria vesca subsp. vesca]	2.577	1.36546	1.50962e-06	4.13017e-05	yes	up
FxaC_7g09670	FxaC_7g09670	PREDICTED: MATE efflux family protein 5 [Fragaria vesca subsp. vesca]	5.095	2.34914	1.51231e-06	4.13556e-05	yes	up
FxaC_2g16760	FxaC_2g16760	PREDICTED: uncharacterized protein LOC101299214 [Fragaria vesca subsp. vesca]	0.497	-1.00844	1.52124e-06	4.15599e-05	yes	down
FxaC_21g06380	FxaC_21g06380	PREDICTED: metalloendoproteinase 1-like [Fragaria vesca subsp. vesca]	21.539	4.42886	1.52529e-06	4.16507e-05	yes	up
FxaC_5g24940	FxaC_5g24940	PREDICTED: carbonic anhydrase 2-like [Fragaria vesca subsp. vesca]	2.856	1.51404	1.53014e-06	4.17434e-05	yes	up
FxaC_21g28570	FxaC_21g28570	PREDICTED: ankyrin repeat-containing protein At2g01680-like [Fragaria vesca subsp. vesca]	3.466	1.79328	1.53996e-06	4.19912e-05	yes	up
FxaC_9g26120	FxaC_9g26120	PREDICTED: NAC domain-containing protein 90 [Fragaria vesca subsp. vesca]	7.878	2.9778	1.54778e-06	4.21643e-05	yes	up
FxaC_26g04350	FxaC_26g04350	PREDICTED: U-box domain-containing protein 44-like [Fragaria vesca subsp. vesca]	8.994	3.16896	1.57421e-06	4.27622e-05	yes	up
FxaC_16g23960	FxaC_16g23960	cytochrome P450 CYP749A22-like [Rosa chinensis]	3.606	1.85038	1.58813e-06	4.31198e-05	yes	up
FxaC_13g08570	FxaC_13g08570	beta-1,3-glucanase [Fragaria x ananassa]	2.852	1.5121	1.59014e-06	4.31538e-05	yes	up
FxaC_14g08120	FxaC_14g08120	PREDICTED: uncharacterized protein LOC101299287 isoform X2 [Fragaria vesca subsp. vesca]	2.085	1.05993	1.5943e-06	4.32464e-05	yes	up
FxaC_24g04140	FxaC_24g04140	PREDICTED: uncharacterized protein LOC101296410 [Fragaria vesca subsp. vesca]	0.246	-2.02423	1.61315e-06	4.37163e-05	yes	down
FxaC_12g39400	FxaC_12g39400	PREDICTED: protein LIGHT-DEPENDENT SHORT HYPOCOTYLS 4-like [Fragaria vesca subsp. vesca]	2.66	1.41154	1.61834e-06	4.38362e-05	yes	up
FxaC_23g26440	FxaC_23g26440	proline-rich receptor-like protein kinase PERK2 [Rosa chinensis]	0.239	-2.06447	1.67262e-06	4.52637e-05	yes	down
FxaC_10g14690	FxaC_10g14690	PREDICTED: CTP synthase-like isoform X2 [Fragaria vesca subsp. vesca]	2.879	1.52563	1.68956e-06	4.56571e-05	yes	up
FxaC_28g10180	FxaC_28g10180	PREDICTED: probable LRR receptor-like serine/threonine-protein kinase At3g47570 [Fragaria vesca subsp. vesca]	2.38	1.25069	1.69469e-06	4.57743e-05	yes	up
FxaC_10g19610	FxaC_10g19610	PREDICTED: thioredoxin M4, chloroplastic [Fragaria vesca subsp. vesca]	0.469	-1.09099	1.70055e-06	4.5846e-05	yes	down
FxaC_9g47800	FxaC_9g47800	probable leucine-rich repeat receptor-like serine/threonine-protein kinase At3g14840 [Morus notabilis]	2.361	1.23967	1.73798e-06	4.67668e-05	yes	up
FxaC_28g34440	FxaC_28g34440	PREDICTED: probable carboxylesterase 15 [Fragaria vesca subsp. vesca]	3.703	1.88875	1.76352e-06	4.7365e-05	yes	up
FxaC_7g15420	FxaC_7g15420	PREDICTED: 3-hydroxy-3-methylglutaryl-coenzyme A reductase 1-like [Fragaria vesca subsp. vesca]	2.631	1.39574	1.77931e-06	4.77444e-05	yes	up
FxaC_23g49760	FxaC_23g49760	PREDICTED: probable mitochondrial chaperone BCS1-B isoform X1 [Fragaria vesca subsp. vesca]	0.418	-1.25805	1.81631e-06	4.86687e-05	yes	down
FxaC_9g14090	FxaC_9g14090	PREDICTED: zinc finger protein ZAT12-like [Fragaria vesca subsp. vesca]	4.263	2.09175	1.83715e-06	4.92041e-05	yes	up
FxaC_4g30940	FxaC_4g30940	PREDICTED: sucrose synthase [Fragaria vesca subsp. vesca]	0.383	-1.38554	1.85234e-06	4.95644e-05	yes	down
FxaC_18g24760	FxaC_18g24760	PREDICTED: phospholipase A1-Ibeta2, chloroplastic [Fragaria vesca subsp. vesca]	3.427	1.77695	1.89508e-06	5.06136e-05	yes	up
FxaC_18g42910	FxaC_18g42910	PREDICTED: uncharacterized protein LOC101295050 [Fragaria vesca subsp. vesca]	3.158	1.65923	1.89625e-06	5.06211e-05	yes	up
FxaC_14g24250	FxaC_14g24250	PREDICTED: probable linoleate 9S-lipoxygenase 5 [Fragaria vesca subsp. vesca]	2.036	1.02561	1.90385e-06	5.08004e-05	yes	up
FxaC_12g16480	FxaC_12g16480	PREDICTED: lysosomal Pro-X carboxypeptidase-like [Fragaria vesca subsp. vesca]	0.492	-1.02378	1.9411e-06	5.16979e-05	yes	down
FxaC_26g04860	FxaC_26g04860	PREDICTED: probable plastid-lipid-associated protein 14, chloroplastic [Fragaria vesca subsp. vesca]	0.078	-3.67692	1.94508e-06	5.17798e-05	yes	down
FxaC_7g14020	FxaC_7g14020	PREDICTED: L-ascorbate oxidase homolog [Fragaria vesca subsp. vesca]	0.483	-1.04885	1.95067e-06	5.19045e-05	yes	down
FxaC_9g45420	FxaC_9g45420	PREDICTED: squamosa promoter-binding-like protein 3 [Fragaria vesca subsp. vesca]	0.455	-1.13752	1.95739e-06	5.20591e-05	yes	down
FxaC_22g39240	FxaC_22g39240	PREDICTED: syntaxin-121 [Fragaria vesca subsp. vesca]	2.91	1.54093	1.9592e-06	5.2083e-05	yes	up
FxaC_17g06180	FxaC_17g06180	PREDICTED: mitogen-activated protein kinase kinase kinase 7-like [Fragaria vesca subsp. vesca]	0.293	-1.77311	2.00577e-06	5.32569e-05	yes	down
FxaC_27g17600	FxaC_27g17600	PREDICTED: probable mediator of RNA polymerase II transcription subunit 37c [Fragaria vesca subsp. vesca]	0.474	-1.0766	2.00615e-06	5.32569e-05	yes	down
FxaC_24g18310	FxaC_24g18310	hypothetical protein RchiOBHm_Chr3g0464651 [Rosa chinensis]	2.514	1.33009	2.00788e-06	5.32782e-05	yes	up
FxaC_10g11210	FxaC_10g11210	PREDICTED: wall-associated receptor kinase 3-like, partial [Fragaria vesca subsp. vesca]	4.753	2.2487	2.01609e-06	5.34464e-05	yes	up
FxaC_12g06310	FxaC_12g06310	transcription factor SCREAM2-like [Rosa chinensis]	0.227	-2.1395	2.03599e-06	5.3924e-05	yes	down
FxaC_18g43620	FxaC_18g43620	PREDICTED: BTB/POZ domain-containing protein At5g41330 [Fragaria vesca subsp. vesca]	2.45	1.29294	2.03774e-06	5.39454e-05	yes	up
FxaC_27g32810	FxaC_27g32810	transcriptional activator Myb [Fragaria vesca]	2.508	1.32675	2.04243e-06	5.40445e-05	yes	up
FxaC_12g40170	FxaC_12g40170	PREDICTED: nuclear transcription factor Y subunit A-7 [Fragaria vesca subsp. vesca]	2.153	1.10664	2.05056e-06	5.42347e-05	yes	up
FxaC_17g26870	FxaC_17g26870	PREDICTED: flavonol synthase 3-like [Fragaria vesca subsp. vesca]	2.798	1.48461	2.07005e-06	5.47249e-05	yes	up
FxaC_28g02450	FxaC_28g02450	PREDICTED: probable plastid-lipid-associated protein 14, chloroplastic [Fragaria vesca subsp. vesca]	0.086	-3.53966	2.07731e-06	5.48914e-05	yes	down
FxaC_21g57580	FxaC_21g57580	PREDICTED: ferritin-3, chloroplastic [Fragaria vesca subsp. vesca]	16	4.00004	2.08185e-06	5.49859e-05	yes	up
FxaC_21g53290	FxaC_21g53290	hypothetical protein RchiOBHm_Chr3g0464651 [Rosa chinensis]	2.503	1.32355	2.09311e-06	5.52454e-05	yes	up
FxaC_11g15540	FxaC_11g15540	PREDICTED: interactor of constitutive active ROPs 1-like [Fragaria vesca subsp. vesca]	0.389	-1.36288	2.09361e-06	5.52454e-05	yes	down
FxaC_24g57150	FxaC_24g57150	PREDICTED: uncharacterized protein LOC101314873 isoform X2 [Fragaria vesca subsp. vesca]	2.835	1.50312	2.09457e-06	5.52454e-05	yes	up
FxaC_12g47070	FxaC_12g47070	PREDICTED: G-type lectin S-receptor-like serine/threonine-protein kinase SD1-29 [Fragaria vesca subsp. vesca]	2.02	1.01451	2.10428e-06	5.54504e-05	yes	up
FxaC_16g06200	FxaC_16g06200	PREDICTED: serine carboxypeptidase-like 13 [Fragaria vesca subsp. vesca]	0.068	-3.8698	2.11003e-06	5.55763e-05	yes	down
FxaC_13g24040	FxaC_13g24040	PREDICTED: pectin acetylesterase 10-like [Fragaria vesca subsp. vesca]	0.478	-1.06633	2.11809e-06	5.57631e-05	yes	down
FxaC_20g08400	FxaC_20g08400	PREDICTED: probable inactive leucine-rich repeat receptor-like protein kinase At3g03770 [Fragaria vesca subsp. vesca]	0.455	-1.13738	2.12593e-06	5.59179e-05	yes	down
FxaC_17g10090	FxaC_17g10090	protein ACCELERATED CELL DEATH 6-like isoform X1 [Rosa chinensis]	2.031	1.02205	2.12705e-06	5.59218e-05	yes	up
FxaC_4g23850	FxaC_4g23850	PREDICTED: uncharacterized acetyltransferase At3g50280-like [Fragaria vesca subsp. vesca]	0.437	-1.19544	2.16195e-06	5.67611e-05	yes	down
FxaC_27g04950	FxaC_27g04950	PREDICTED: cytosolic sulfotransferase 15-like [Fragaria vesca subsp. vesca]	0.385	-1.3782	2.17579e-06	5.7072e-05	yes	down
FxaC_27g04930	FxaC_27g04930	PREDICTED: cytosolic sulfotransferase 15-like [Fragaria vesca subsp. vesca]	0.385	-1.3782	2.17579e-06	5.7072e-05	yes	down
FxaC_5g41560	FxaC_5g41560	PREDICTED: receptor-like protein kinase HAIKU2 [Fragaria vesca subsp. vesca]	2.086	1.06069	2.18835e-06	5.73754e-05	yes	up
FxaC_8g08040	FxaC_8g08040	PREDICTED: GDSL esterase/lipase EXL3-like [Fragaria vesca subsp. vesca]	0.433	-1.20899	2.18964e-06	5.73829e-05	yes	down
FxaC_14g20210	FxaC_14g20210	PREDICTED: RING-H2 finger protein ATL2 [Fragaria vesca subsp. vesca]	2.487	1.31467	2.22315e-06	5.80749e-05	yes	up
FxaC_18g28010	FxaC_18g28010	PREDICTED: uncharacterized protein LOC101310607 isoform X1 [Fragaria vesca subsp. vesca]	2.549	1.34981	2.24033e-06	5.8497e-05	yes	up
FxaC_17g24240	FxaC_17g24240	PREDICTED: aspartic proteinase nepenthesin-2 [Fragaria vesca subsp. vesca]	0.154	-2.69601	2.2628e-06	5.90297e-05	yes	down
FxaC_25g09260	FxaC_25g09260	uncharacterized protein LOC111294868 [Durio zibethinus]	2.132	1.0924	2.37462e-06	6.17778e-05	yes	up
FxaC_16g26800	FxaC_16g26800	PREDICTED: U-box domain-containing protein 11 [Fragaria vesca subsp. vesca]	0.37	-1.43518	2.42014e-06	6.28763e-05	yes	down
FxaC_14g38500	FxaC_14g38500	PREDICTED: GDT1-like protein 2, chloroplastic [Fragaria vesca subsp. vesca]	2.094	1.06636	2.4293e-06	6.30858e-05	yes	up
FxaC_20g23350	FxaC_20g23350	PREDICTED: protein NRT1/ PTR FAMILY 7.3 [Fragaria vesca subsp. vesca]	2.402	1.26439	2.44591e-06	6.34019e-05	yes	up
FxaC_15g20110	FxaC_15g20110	CASP-like protein 1E1 [Rosa chinensis]	0.487	-1.03888	2.46737e-06	6.38715e-05	yes	down
FxaC_7g04830	FxaC_7g04830	PREDICTED: 2-hydroxyisoflavanone dehydratase-like [Fragaria vesca subsp. vesca]	0.053	-4.23431	2.47771e-06	6.40915e-05	yes	down
FxaC_26g08820	FxaC_26g08820	PREDICTED: protein EXORDIUM-like 3 [Fragaria vesca subsp. vesca]	0.352	-1.5076	2.47811e-06	6.40915e-05	yes	down
FxaC_21g34250	FxaC_21g34250	PREDICTED: heat stress transcription factor A-4c-like [Fragaria vesca subsp. vesca]	2.013	1.00917	2.48776e-06	6.42539e-05	yes	up
FxaC_22g11330	FxaC_22g11330	PREDICTED: xyloglucan endotransglucosylase/hydrolase protein 9 [Fragaria vesca subsp. vesca]	0.115	-3.11733	2.50601e-06	6.46962e-05	yes	down
FxaC_28g16390	FxaC_28g16390	hypothetical protein RchiOBHm_Chr1g0363951 [Rosa chinensis]	15.329	3.93816	2.52092e-06	6.50243e-05	yes	up
FxaC_23g45500	FxaC_23g45500	PREDICTED: probable inactive leucine-rich repeat receptor-like protein kinase At3g03770 [Fragaria vesca subsp. vesca]	0.406	-1.30131	2.52099e-06	6.50243e-05	yes	down
FxaC_9g42000	FxaC_9g42000	PREDICTED: receptor-like protein 12 [Fragaria vesca subsp. vesca]	2.223	1.15238	2.5421e-06	6.55096e-05	yes	up
FxaC_13g20010	FxaC_13g20010	PREDICTED: E3 ubiquitin-protein ligase RGLG2-like [Fragaria vesca subsp. vesca]	4.082	2.02944	2.58534e-06	6.64468e-05	yes	up
FxaC_1g08090	FxaC_1g08090	PREDICTED: uncharacterized protein LOC101303548 [Fragaria vesca subsp. vesca]	2.828	1.49991	2.58543e-06	6.64468e-05	yes	up
FxaC_23g40950	FxaC_23g40950	PREDICTED: uncharacterized protein LOC101299777 [Fragaria vesca subsp. vesca]	3.806	1.92836	2.60833e-06	6.69751e-05	yes	up
FxaC_24g34290	FxaC_24g34290	PREDICTED: tyrosine aminotransferase-like isoform X1 [Fragaria vesca subsp. vesca]	0.07	-3.8283	2.61046e-06	6.69999e-05	yes	down
FxaC_9g51850	FxaC_9g51850	PREDICTED: G-type lectin S-receptor-like serine/threonine-protein kinase SD1-29 [Fragaria vesca subsp. vesca]	3.473	1.79619	2.62475e-06	6.73063e-05	yes	up
FxaC_16g30570	FxaC_16g30570	Recname: Full=D-galacturonate reductase; Short=FaGalUR; Altname: Full=Aldo-keto reductase 2 >gi|2792295|gb|AAB97005.1| unknown [Fragaria x ananassa]	2.013	1.00956	2.64314e-06	6.77474e-05	yes	up
FxaC_5g43350	FxaC_5g43350	PREDICTED: uncharacterized protein LOC101304340 [Fragaria vesca subsp. vesca]	0.197	-2.34481	2.65106e-06	6.78898e-05	yes	down
FxaC_7g21160	FxaC_7g21160	PREDICTED: hyoscyamine 6-dioxygenase-like [Fragaria vesca subsp. vesca]	27.041	4.75707	2.67031e-06	6.83215e-05	yes	up
FxaC_12g23610	FxaC_12g23610	PREDICTED: probable CCR4-associated factor 1 homolog 11 [Fragaria vesca subsp. vesca]	3.486	1.80162	2.70708e-06	6.92005e-05	yes	up
FxaC_7g42860	FxaC_7g42860	PREDICTED: probable galacturonosyltransferase-like 1 [Fragaria vesca subsp. vesca]	2.704	1.43533	2.74903e-06	7.01788e-05	yes	up
FxaC_22g10920	FxaC_22g10920	PREDICTED: G-type lectin S-receptor-like serine/threonine-protein kinase At4g27290 [Fragaria vesca subsp. vesca]	5.489	2.45661	2.75933e-06	7.04102e-05	yes	up
FxaC_20g28170	FxaC_20g28170	PREDICTED: CASP-like protein 2A1 [Fragaria vesca subsp. vesca]	2.723	1.4451	2.7675e-06	7.05558e-05	yes	up
FxaC_26g33470	FxaC_26g33470	PREDICTED: probable LRR receptor-like serine/threonine-protein kinase At3g47570 [Fragaria vesca subsp. vesca]	5.065	2.34059	2.77774e-06	7.0754e-05	yes	up
FxaC_5g01300	FxaC_5g01300	PREDICTED: zinc finger protein ZAT10 [Fragaria vesca subsp. vesca]	2.052	1.0367	2.79221e-06	7.10591e-05	yes	up
FxaC_25g61740	FxaC_25g61740	PREDICTED: probable plastid-lipid-associated protein 14, chloroplastic [Fragaria vesca subsp. vesca]	0.086	-3.54718	2.81596e-06	7.15363e-05	yes	down
FxaC_27g10080	FxaC_27g10080	PREDICTED: protein NRT1/ PTR FAMILY 7.2-like [Fragaria vesca subsp. vesca]	6.49	2.69827	2.86177e-06	7.26357e-05	yes	up
FxaC_11g25060	FxaC_11g25060	PREDICTED: ankyrin repeat-containing protein At5g02620-like [Fragaria vesca subsp. vesca]	3.373	1.75386	2.88025e-06	7.30076e-05	yes	up
FxaC_22g34880	FxaC_22g34880	PREDICTED: FK506-binding protein 4-like [Fragaria vesca subsp. vesca]	92.029	6.52401	2.91895e-06	7.38635e-05	yes	up
FxaC_13g21280	FxaC_13g21280	uncharacterized protein LOC112196626 [Rosa chinensis]	0.222	-2.17313	2.93808e-06	7.42761e-05	yes	down
FxaC_11g30570	FxaC_11g30570	PREDICTED: pleiotropic drug resistance protein 2-like [Fragaria vesca subsp. vesca]	2.335	1.22356	2.96351e-06	7.4886e-05	yes	up
FxaC_13g53640	FxaC_13g53640	PREDICTED: uncharacterized protein LOC101298064 [Fragaria vesca subsp. vesca]	3.279	1.7134	2.97404e-06	7.51188e-05	yes	up
FxaC_5g26800	FxaC_5g26800	PREDICTED: phytosulfokine receptor 2 [Fragaria vesca subsp. vesca]	2.348	1.23113	3.00451e-06	7.5855e-05	yes	up
FxaC_2g27490	FxaC_2g27490	PREDICTED: peroxidase 17-like [Fragaria vesca subsp. vesca]	3.493	1.8046	3.00718e-06	7.58888e-05	yes	up
FxaC_13g20650	FxaC_13g20650	very-long-chain 3-oxoacyl-CoA reductase 1-like [Rosa chinensis]	0.472	-1.08261	3.01944e-06	7.61647e-05	yes	down
FxaC_19g05650	FxaC_19g05650	PREDICTED: putative mediator of RNA polymerase II transcription subunit 26 [Fragaria vesca subsp. vesca]	2.004	1.00267	3.03432e-06	7.65014e-05	yes	up
FxaC_5g01720	FxaC_5g01720	PREDICTED: putative nucleobase-ascorbate transporter 10 [Fragaria vesca subsp. vesca]	0.159	-2.65478	3.03546e-06	7.65014e-05	yes	down
FxaC_21g08860	FxaC_21g08860	PREDICTED: cell division topological specificity factor homolog, chloroplastic-like [Fragaria vesca subsp. vesca]	0.271	-1.88311	3.09775e-06	7.79681e-05	yes	down
FxaC_11g00550	FxaC_11g00550	PREDICTED: putative cyclin-D6-1 [Fragaria vesca subsp. vesca]	0.148	-2.75598	3.1327e-06	7.87785e-05	yes	down
FxaC_19g01850	FxaC_19g01850	thaumatin-like protein [Prunus persica]	3.741	1.9034	3.13914e-06	7.89058e-05	yes	up
FxaC_20g02830	FxaC_20g02830	PREDICTED: uncharacterized protein At1g76660-like [Fragaria vesca subsp. vesca]	2.554	1.35279	3.17743e-06	7.96583e-05	yes	up
FxaC_25g14720	FxaC_25g14720	PREDICTED: receptor-like protein kinase 2 [Fragaria vesca subsp. vesca]	8.969	3.16501	3.21486e-06	8.04911e-05	yes	up
FxaC_28g31730	FxaC_28g31730	PREDICTED: probable LRR receptor-like serine/threonine-protein kinase At3g47570 [Fragaria vesca subsp. vesca]	3.997	1.99894	3.25324e-06	8.13807e-05	yes	up
FxaC_20g08670	FxaC_20g08670	PREDICTED: probable inactive purple acid phosphatase 27 [Fragaria vesca subsp. vesca]	0.397	-1.33261	3.26847e-06	8.17261e-05	yes	down
FxaC_24g14750	FxaC_24g14750	PREDICTED: F-box/LRR-repeat protein 3 [Fragaria vesca subsp. vesca]	2.167	1.11587	3.27946e-06	8.19292e-05	yes	up
FxaC_19g39300	FxaC_19g39300	PREDICTED: uncharacterized protein LOC101313973 [Fragaria vesca subsp. vesca]	2.933	1.55239	3.30258e-06	8.2363e-05	yes	up
FxaC_5g45600	FxaC_5g45600	PREDICTED: transcription factor RADIALIS-like [Fragaria vesca subsp. vesca]	2.061	1.04324	3.3471e-06	8.34368e-05	yes	up
FxaC_18g28070	FxaC_18g28070	PREDICTED: mitogen-activated protein kinase 9-like [Fragaria vesca subsp. vesca]	0.494	-1.01675	3.35199e-06	8.35225e-05	yes	down
FxaC_6g13440	FxaC_6g13440	PREDICTED: transcription factor ORG2-like [Fragaria vesca subsp. vesca]	0.087	-3.51857	3.37732e-06	8.40429e-05	yes	down
FxaC_27g27490	FxaC_27g27490	PREDICTED: uncharacterized protein LOC101303168 [Fragaria vesca subsp. vesca]	4.683	2.22751	3.39859e-06	8.44629e-05	yes	up
FxaC_22g57170	FxaC_22g57170	PREDICTED: probable transcription factor KAN2 [Fragaria vesca subsp. vesca]	2.641	1.40115	3.41608e-06	8.48609e-05	yes	up
FxaC_23g49150	FxaC_23g49150	PREDICTED: peroxidase 63 [Fragaria vesca subsp. vesca]	0.448	-1.15798	3.42045e-06	8.49325e-05	yes	down
FxaC_1g24560	FxaC_1g24560	PREDICTED: annexin D1-like [Fragaria vesca subsp. vesca]	0.472	-1.0821	3.42606e-06	8.50349e-05	yes	down
FxaC_15g39580	FxaC_15g39580	PREDICTED: protein argonaute 10 [Fragaria vesca subsp. vesca]	2.172	1.11906	3.43922e-06	8.52875e-05	yes	up
FxaC_18g00670	FxaC_18g00670	PREDICTED: uncharacterized protein LOC101307212 [Fragaria vesca subsp. vesca]	0.332	-1.58859	3.44856e-06	8.54822e-05	yes	down
FxaC_2g22360	FxaC_2g22360	PREDICTED: TMV resistance protein N-like, partial [Fragaria vesca subsp. vesca]	2.434	1.28319	3.45691e-06	8.5652e-05	yes	up
FxaC_13g03280	FxaC_13g03280	PREDICTED: probable alpha,alpha-trehalose-phosphate synthase [UDP-forming]	0.339	-1.56148	3.48186e-06	8.6233e-05	yes	down
FxaC_2g08810	FxaC_2g08810	PREDICTED: phosphatidylinositol/phosphatidylcholine transfer protein SFH12-like [Fragaria vesca subsp. vesca]	7.935	2.98824	3.49639e-06	8.65179e-05	yes	up
FxaC_12g47400	FxaC_12g47400	PREDICTED: uncharacterized protein LOC101293080 [Fragaria vesca subsp. vesca]	0.445	-1.16651	3.55129e-06	8.77625e-05	yes	down
FxaC_9g19410	FxaC_9g19410	PREDICTED: UDP-D-apiose/UDP-D-xylose synthase 2 [Fragaria vesca subsp. vesca]	0.473	-1.07967	3.5621e-06	8.79916e-05	yes	down
FxaC_10g20600	FxaC_10g20600	uncharacterized protein LOC111438394 [Cucurbita moschata]	0.065	-3.93756	3.59052e-06	8.86555e-05	yes	down
FxaC_7g12340	FxaC_7g12340	PREDICTED: protein TRANSPARENT TESTA 12-like [Fragaria vesca subsp. vesca]	0.003	-8.23647	3.61878e-06	8.92377e-05	yes	down
FxaC_12g39520	FxaC_12g39520	PREDICTED: tetrahydrocannabinolic acid synthase-like [Fragaria vesca subsp. vesca]	3.313	1.72832	3.62252e-06	8.92916e-05	yes	up
FxaC_24g57620	FxaC_24g57620	PREDICTED: probable calcium-binding protein CML45 [Fragaria vesca subsp. vesca]	4.634	2.21221	3.72708e-06	9.1632e-05	yes	up
FxaC_14g09340	FxaC_14g09340	transcription factor HHO3-like isoform X1 [Rosa chinensis]	0.095	-3.39873	3.74242e-06	9.18871e-05	yes	down
FxaC_6g04170	FxaC_6g04170	-	2.008	1.00612	3.78329e-06	9.27748e-05	yes	up
FxaC_4g25360	FxaC_4g25360	hypothetical protein PRUPE_7G145500 [Prunus persica]	0.463	-1.11003	3.80453e-06	9.31331e-05	yes	down
FxaC_9g40110	FxaC_9g40110	G-type lectin S-receptor-like serine/threonine-protein kinase CES101 [Prunus avium]	2.381	1.2516	3.82776e-06	9.36248e-05	yes	up
FxaC_13g30410	FxaC_13g30410	PREDICTED: xyloglucan endotransglucosylase/hydrolase 2-like [Fragaria vesca subsp. vesca]	0.055	-4.19267	3.85668e-06	9.42917e-05	yes	down
FxaC_23g40480	FxaC_23g40480	PREDICTED: receptor-like protein 12 isoform X1 [Fragaria vesca subsp. vesca]	2.615	1.38673	3.9072e-06	9.54454e-05	yes	up
FxaC_24g03750	FxaC_24g03750	PREDICTED: B2 protein [Fragaria vesca subsp. vesca]	0.008	-6.93222	3.96907e-06	9.67915e-05	yes	down
FxaC_17g51020	FxaC_17g51020	-	0.098	-3.35188	3.97768e-06	9.69602e-05	yes	down
FxaC_8g24820	FxaC_8g24820	-	10.765	3.42824	4.074e-06	9.90537e-05	yes	up
FxaC_22g70820	FxaC_22g70820	putative glycerophosphodiester phosphodiesterase, protein kinase RLK-Pelle-LRK10L-2 family [Rosa chinensis]	3.822	1.93424	4.07568e-06	9.90537e-05	yes	up
FxaC_11g00970	FxaC_11g00970	PREDICTED: uncharacterized protein LOC101303095 [Fragaria vesca subsp. vesca]	3.824	1.93517	4.14338e-06	0.000100443	yes	up
FxaC_2g22130	FxaC_2g22130	PREDICTED: chromosome-associated kinesin KIF4A-like [Fragaria vesca subsp. vesca]	2.02	1.01418	4.15856e-06	0.000100732	yes	up
FxaC_17g56300	FxaC_17g56300	PREDICTED: uncharacterized protein LOC101307212 [Fragaria vesca subsp. vesca]	0.206	-2.28044	4.18626e-06	0.000101354	yes	down
FxaC_2g26150	FxaC_2g26150	PREDICTED: probable mannitol dehydrogenase [Fragaria vesca subsp. vesca]	0.468	-1.09469	4.2262e-06	0.000102107	yes	down
FxaC_25g39080	FxaC_25g39080	PREDICTED: probable receptor-like protein kinase At5g39030 [Fragaria vesca subsp. vesca]	3.308	1.72596	4.25391e-06	0.000102558	yes	up
FxaC_26g24720	FxaC_26g24720	PREDICTED: cytosolic sulfotransferase 15-like [Fragaria vesca subsp. vesca]	0.17	-2.55845	4.26561e-06	0.000102754	yes	down
FxaC_7g21220	FxaC_7g21220	PREDICTED: WAT1-related protein At1g44800-like isoform X1 [Fragaria vesca subsp. vesca]	2.335	1.22342	4.29806e-06	0.000103405	yes	up
FxaC_26g20040	FxaC_26g20040	PREDICTED: uncharacterized protein LOC101310269 [Fragaria vesca subsp. vesca]	0.317	-1.65864	4.44058e-06	0.00010641	yes	down
FxaC_20g14980	FxaC_20g14980	PREDICTED: uncharacterized protein LOC101304195 isoform X1 [Fragaria vesca subsp. vesca]	0.349	-1.51821	4.50011e-06	0.000107722	yes	down
FxaC_6g12780	FxaC_6g12780	PREDICTED: glutamate receptor 2.8-like [Fragaria vesca subsp. vesca]	4.771	2.2543	4.55218e-06	0.000108787	yes	up
FxaC_24g16370	FxaC_24g16370	PREDICTED: BAHD acyltransferase DCR [Fragaria vesca subsp. vesca]	0.258	-1.95262	4.60656e-06	0.000109949	yes	down
FxaC_24g01470	FxaC_24g01470	PREDICTED: LOW QUALITY PROTEIN: uncharacterized protein LOC101295558 [Fragaria vesca subsp. vesca]	5.211	2.38153	4.61301e-06	0.000110057	yes	up
FxaC_9g01790	FxaC_9g01790	PREDICTED: tyrosine-sulfated glycopeptide receptor 1-like [Fragaria vesca subsp. vesca]	2.329	1.21943	4.64908e-06	0.00011074	yes	up
FxaC_18g17400	FxaC_18g17400	PREDICTED: putative DNA-binding protein ESCAROLA [Fragaria vesca subsp. vesca]	2.019	1.01333	4.69144e-06	0.000111515	yes	up
FxaC_22g51630	FxaC_22g51630	PREDICTED: L-type lectin-domain containing receptor kinase VIII.1 [Fragaria vesca subsp. vesca]	0.335	-1.57718	4.69167e-06	0.000111515	yes	down
FxaC_23g16590	FxaC_23g16590	PREDICTED: probable receptor-like protein kinase At1g67000 [Fragaria vesca subsp. vesca]	3.259	1.70441	4.70514e-06	0.000111742	yes	up
FxaC_7g13750	FxaC_7g13750	protein PELPK1 [Rosa chinensis]	0.197	-2.3411	4.70965e-06	0.000111803	yes	down
FxaC_25g04470	FxaC_25g04470	PREDICTED: probable aquaporin TIP1-2 [Fragaria vesca subsp. vesca]	0.224	-2.15921	4.74009e-06	0.000112412	yes	down
FxaC_22g05640	FxaC_22g05640	PREDICTED: 2-aminoethanethiol dioxygenase-like [Fragaria vesca subsp. vesca]	0.39	-1.35755	4.81665e-06	0.000114059	yes	down
FxaC_6g02330	FxaC_6g02330	PREDICTED: squalene monooxygenase-like [Fragaria vesca subsp. vesca]	2.341	1.22725	4.84068e-06	0.000114533	yes	up
FxaC_22g67850	FxaC_22g67850	PREDICTED: uncharacterized protein LOC101300067 [Fragaria vesca subsp. vesca]	3.539	1.82326	4.8611e-06	0.000114969	yes	up
FxaC_23g16600	FxaC_23g16600	PREDICTED: probable receptor-like protein kinase At1g67000 [Fragaria vesca subsp. vesca]	2.237	1.16158	4.88787e-06	0.000115507	yes	up
FxaC_22g63040	FxaC_22g63040	-	2.038	1.02697	4.89575e-06	0.000115597	yes	up
FxaC_6g19730	FxaC_6g19730	probable flavin-containing monooxygenase 1 [Prunus persica]	0.342	-1.54894	4.94756e-06	0.000116724	yes	down
FxaC_24g33340	FxaC_24g33340	PREDICTED: uncharacterized protein LOC101297757 [Fragaria vesca subsp. vesca]	0.465	-1.10351	5.00568e-06	0.00011795	yes	down
FxaC_24g54190	FxaC_24g54190	PREDICTED: uncharacterized protein LOC101314197 [Fragaria vesca subsp. vesca]	4.103	2.03665	5.03828e-06	0.000118523	yes	up
FxaC_28g21160	FxaC_28g21160	PREDICTED: protein ABIL1 [Fragaria vesca subsp. vesca]	0.321	-1.63827	5.09513e-06	0.000119811	yes	down
FxaC_22g65350	FxaC_22g65350	PREDICTED: uncharacterized protein LOC101298033 isoform X1 [Fragaria vesca subsp. vesca]	2.819	1.49535	5.1486e-06	0.000120919	yes	up
FxaC_21g62020	FxaC_21g62020	PREDICTED: high mobility group B protein 9-like isoform X1 [Fragaria vesca subsp. vesca]	0.342	-1.54966	5.20564e-06	0.000122159	yes	down
FxaC_1g09600	FxaC_1g09600	PREDICTED: pollen receptor-like kinase 3 [Fragaria vesca subsp. vesca]	0.499	-1.00408	5.27675e-06	0.000123675	yes	down
FxaC_15g02520	FxaC_15g02520	PREDICTED: WAT1-related protein At1g70260 [Fragaria vesca subsp. vesca]	3.734	1.90065	5.33483e-06	0.000124832	yes	up
FxaC_8g26570	FxaC_8g26570	PREDICTED: putative laccase-9 [Fragaria vesca subsp. vesca]	0.049	-4.35624	5.42392e-06	0.000126479	yes	down
FxaC_18g03490	FxaC_18g03490	-	3.153	1.65663	5.44921e-06	0.00012689	yes	up
FxaC_25g30500	FxaC_25g30500	PREDICTED: shaggy-related protein kinase theta-like [Fragaria vesca subsp. vesca]	2.056	1.03956	5.48012e-06	0.000127543	yes	up
FxaC_25g59890	FxaC_25g59890	PREDICTED: protein TRANSPARENT TESTA 12-like [Fragaria vesca subsp. vesca]	2.593	1.37435	5.59239e-06	0.000130061	yes	up
FxaC_4g27520	FxaC_4g27520	B-box zinc finger protein 19-like [Rosa chinensis]	2.119	1.08367	5.60511e-06	0.000130304	yes	up
FxaC_7g06100	FxaC_7g06100	PREDICTED: uncharacterized protein LOC101304648 [Fragaria vesca subsp. vesca]	2.552	1.35163	5.65732e-06	0.000131358	yes	up
FxaC_7g34610	FxaC_7g34610	PREDICTED: U-box domain-containing protein 4-like [Fragaria vesca subsp. vesca]	2.319	1.21351	5.67844e-06	0.000131795	yes	up
FxaC_21g35270	FxaC_21g35270	PREDICTED: protein trichome birefringence-like 39 [Fragaria vesca subsp. vesca]	0.25	-1.99984	5.69401e-06	0.000132103	yes	down
FxaC_24g12510	FxaC_24g12510	hydrophobic protein RCI2A [Prunus persica]	0.302	-1.72772	5.70632e-06	0.000132334	yes	down
FxaC_9g01810	FxaC_9g01810	PREDICTED: receptor-like protein 2 [Fragaria vesca subsp. vesca]	2.352	1.23391	5.76062e-06	0.000133378	yes	up
FxaC_28g03670	FxaC_28g03670	PREDICTED: S-type anion channel SLAH2-like isoform X1 [Fragaria vesca subsp. vesca]	3.26	1.705	5.84771e-06	0.000135284	yes	up
FxaC_27g32010	FxaC_27g32010	PREDICTED: caffeoylshikimate esterase-like [Fragaria vesca subsp. vesca]	2.135	1.09425	5.8527e-06	0.000135328	yes	up
FxaC_3g07980	FxaC_3g07980	PREDICTED: uncharacterized protein LOC101303548 [Fragaria vesca subsp. vesca]	2.919	1.54548	5.86197e-06	0.00013545	yes	up
FxaC_12g49660	FxaC_12g49660	PREDICTED: mavicyanin-like [Fragaria vesca subsp. vesca]	0.47	-1.09075	5.91072e-06	0.000136466	yes	down
FxaC_2g10000	FxaC_2g10000	PREDICTED: uncharacterized protein LOC101307251 [Fragaria vesca subsp. vesca]	0.215	-2.21896	6.03272e-06	0.000139003	yes	down
FxaC_19g04940	FxaC_19g04940	putative receptor protein kinase ZmPK1 [Rosa chinensis]	2.433	1.28301	6.05647e-06	0.000139438	yes	up
FxaC_15g01600	FxaC_15g01600	PREDICTED: protein NRT1/ PTR FAMILY 2.13-like [Fragaria vesca subsp. vesca]	2.464	1.30072	6.07273e-06	0.0001397	yes	up
FxaC_11g06090	FxaC_11g06090	PREDICTED: MLO-like protein 12 isoform X1 [Fragaria vesca subsp. vesca]	2.832	1.5017	6.07947e-06	0.000139798	yes	up
FxaC_10g42120	FxaC_10g42120	PREDICTED: tubulin beta chain [Fragaria vesca subsp. vesca]	0.458	-1.12625	6.13761e-06	0.000140909	yes	down
FxaC_2g13390	FxaC_2g13390	PREDICTED: 12-oxophytodienoate reductase 3-like [Fragaria vesca subsp. vesca]	2.022	1.01585	6.15575e-06	0.000141269	yes	up
FxaC_18g16980	FxaC_18g16980	PREDICTED: uncharacterized protein LOC101298030 [Fragaria vesca subsp. vesca]	0.355	-1.49291	6.16058e-06	0.000141323	yes	down
FxaC_14g10540	FxaC_14g10540	PREDICTED: uncharacterized protein LOC101308084 [Fragaria vesca subsp. vesca]	0.478	-1.06365	6.21964e-06	0.000142564	yes	down
FxaC_28g00170	FxaC_28g00170	PREDICTED: alcohol dehydrogenase-like 1 [Fragaria vesca subsp. vesca]	2.474	1.3066	6.28591e-06	0.000143967	yes	up
FxaC_22g18250	FxaC_22g18250	PREDICTED: putative hydrolase C777.06c isoform X2 [Fragaria vesca subsp. vesca]	0.46	-1.12186	6.29703e-06	0.000144164	yes	down
FxaC_14g34260	FxaC_14g34260	uncharacterized protein LOC112193995 [Rosa chinensis]	2.162	1.11212	6.3069e-06	0.000144332	yes	up
FxaC_13g05260	FxaC_13g05260	PREDICTED: F-box/kelch-repeat protein At1g23390 [Fragaria vesca subsp. vesca]	0.177	-2.49962	6.33712e-06	0.000144908	yes	down
FxaC_2g35640	FxaC_2g35640	PREDICTED: uncharacterized protein LOC101314230 [Fragaria vesca subsp. vesca]	2.343	1.22812	6.38228e-06	0.000145824	yes	up
FxaC_25g22880	FxaC_25g22880	PREDICTED: uncharacterized protein LOC101307620 [Fragaria vesca subsp. vesca]	0.351	-1.51102	6.4277e-06	0.000146745	yes	down
FxaC_21g08380	FxaC_21g08380	PREDICTED: expansin-A1 [Fragaria vesca subsp. vesca]	0.377	-1.4087	6.4755e-06	0.00014771	yes	down
FxaC_2g28230	FxaC_2g28230	PREDICTED: annexin D2-like [Fragaria vesca subsp. vesca]	0.457	-1.12948	6.52364e-06	0.000148572	yes	down
FxaC_7g41800	FxaC_7g41800	PREDICTED: omega-hydroxypalmitate O-feruloyl transferase [Fragaria vesca subsp. vesca]	0.31	-1.6915	6.60405e-06	0.000150232	yes	down
FxaC_12g45710	FxaC_12g45710	PREDICTED: pentatricopeptide repeat-containing protein At3g57430, chloroplastic [Fragaria vesca subsp. vesca]	89.676	6.48665	6.6614e-06	0.000151416	yes	up
FxaC_22g65630	FxaC_22g65630	PREDICTED: TMV resistance protein N-like [Fragaria vesca subsp. vesca]	4.212	2.07449	6.79086e-06	0.000153992	yes	up
FxaC_25g61030	FxaC_25g61030	PREDICTED: probable WRKY transcription factor 41 [Fragaria vesca subsp. vesca]	4.913	2.29655	6.84392e-06	0.000155072	yes	up
FxaC_28g21320	FxaC_28g21320	PREDICTED: uncharacterized protein LOC101303168 [Fragaria vesca subsp. vesca]	6.128	2.61531	6.90114e-06	0.000156183	yes	up
FxaC_17g32270	FxaC_17g32270	PREDICTED: uncharacterized protein LOC101302456 [Fragaria vesca subsp. vesca]	3.291	1.71847	6.90457e-06	0.000156199	yes	up
FxaC_21g49680	FxaC_21g49680	proline-rich receptor-like protein kinase PERK2 [Rosa chinensis]	0.16	-2.643	6.93205e-06	0.000156758	yes	down
FxaC_7g40330	FxaC_7g40330	hypothetical protein DCAR_009501 [Daucus carota subsp. sativus]	7.94	2.98918	6.94489e-06	0.000156987	yes	up
FxaC_27g37130	FxaC_27g37130	PREDICTED: uncharacterized protein LOC101309494 [Fragaria vesca subsp. vesca]	0.461	-1.11704	7.02399e-06	0.000158462	yes	down
FxaC_21g17490	FxaC_21g17490	PREDICTED: putative laccase-9 [Fragaria vesca subsp. vesca]	0.026	-5.27289	7.06669e-06	0.000159363	yes	down
FxaC_17g03740	FxaC_17g03740	PREDICTED: uncharacterized protein LOC101294558 [Fragaria vesca subsp. vesca]	5.221	2.38435	7.10981e-06	0.000160209	yes	up
FxaC_21g18750	FxaC_21g18750	PREDICTED: tetratricopeptide repeat protein 7A [Fragaria vesca subsp. vesca]	0.337	-1.56831	7.21826e-06	0.000162524	yes	down
FxaC_9g02140	FxaC_9g02140	PREDICTED: late embryogenesis abundant protein 1-like [Fragaria vesca subsp. vesca]	0.011	-6.48185	7.22678e-06	0.000162652	yes	down
FxaC_17g26900	FxaC_17g26900	PREDICTED: flavonol synthase 3-like [Fragaria vesca subsp. vesca]	2.082	1.05782	7.2727e-06	0.000163621	yes	up
FxaC_19g38590	FxaC_19g38590	PREDICTED: uncharacterized protein LOC101309548 [Fragaria vesca subsp. vesca]	0.465	-1.10463	7.31304e-06	0.000164335	yes	down
FxaC_22g69030	FxaC_22g69030	PREDICTED: bifunctional 3-dehydroquinate dehydratase/shikimate dehydrogenase, chloroplastic-like [Fragaria vesca subsp. vesca]	0.034	-4.89524	7.3826e-06	0.000165658	yes	down
FxaC_4g39290	FxaC_4g39290	PREDICTED: heat shock 70 kDa protein [Fragaria vesca subsp. vesca]	12.526	3.6469	7.43055e-06	0.000166518	yes	up
FxaC_17g27740	FxaC_17g27740	PREDICTED: putative invertase inhibitor [Fragaria vesca subsp. vesca]	0.061	-4.02453	7.48062e-06	0.000167444	yes	down
FxaC_20g40280	FxaC_20g40280	protein DOWNSTREAM OF FLC-like [Rosa chinensis]	0.465	-1.10581	7.48701e-06	0.000167508	yes	down
FxaC_25g54290	FxaC_25g54290	PREDICTED: U-box domain-containing protein 44-like [Fragaria vesca subsp. vesca]	2.126	1.0881	7.49668e-06	0.000167607	yes	up
FxaC_18g22750	FxaC_18g22750	-	2.006	1.00453	7.53379e-06	0.000168305	yes	up
FxaC_16g17120	FxaC_16g17120	PREDICTED: uncharacterized protein LOC101304379 [Fragaria vesca subsp. vesca]	2.108	1.07599	7.5643e-06	0.00016892	yes	up
FxaC_23g44100	FxaC_23g44100	PREDICTED: nudix hydrolase 13, mitochondrial isoform X1 [Fragaria vesca subsp. vesca]	2.139	1.09698	7.59107e-06	0.000169452	yes	up
FxaC_25g60930	FxaC_25g60930	PREDICTED: plastid division protein PDV1 [Fragaria vesca subsp. vesca]	3.167	1.66302	7.62007e-06	0.000169967	yes	up
FxaC_5g23060	FxaC_5g23060	PREDICTED: chaperone protein dnaJ 10 [Fragaria vesca subsp. vesca]	0.299	-1.74397	7.62439e-06	0.000169997	yes	down
FxaC_24g33390	FxaC_24g33390	PREDICTED: transcription factor RAX2 [Fragaria vesca subsp. vesca]	2.556	1.3537	7.85941e-06	0.000174896	yes	up
FxaC_24g27610	FxaC_24g27610	PREDICTED: receptor-like protein 12 [Fragaria vesca subsp. vesca]	2.091	1.06394	7.87507e-06	0.000175177	yes	up
FxaC_22g69470	FxaC_22g69470	-	9.065	3.18027	7.90691e-06	0.000175817	yes	up
FxaC_22g04670	FxaC_22g04670	PREDICTED: gibberellin-regulated protein 14-like [Fragaria vesca subsp. vesca]	0.052	-4.2637	7.98771e-06	0.000177269	yes	down
FxaC_2g06920	FxaC_2g06920	PREDICTED: G-type lectin S-receptor-like serine/threonine-protein kinase At1g11330 [Fragaria vesca subsp. vesca]	3.343	1.74116	8.06905e-06	0.000178866	yes	up
FxaC_11g25770	FxaC_11g25770	PREDICTED: probable CCR4-associated factor 1 homolog 11 [Fragaria vesca subsp. vesca]	3.272	1.71035	8.11384e-06	0.000179789	yes	up
FxaC_24g00300	FxaC_24g00300	PREDICTED: uncharacterized protein LOC101303718 [Fragaria vesca subsp. vesca]	2.539	1.3443	8.15418e-06	0.000180474	yes	up
FxaC_5g40810	FxaC_5g40810	PREDICTED: UDP-glycosyltransferase 74E1-like isoform X1 [Fragaria vesca subsp. vesca]	0.483	-1.04949	8.18498e-06	0.000181015	yes	down
FxaC_4g29030	FxaC_4g29030	PREDICTED: F-box protein SKIP23-like [Fragaria vesca subsp. vesca]	0.423	-1.24087	8.33261e-06	0.000183854	yes	down
FxaC_11g00010	FxaC_11g00010	PREDICTED: uncharacterized protein LOC101312912 [Fragaria vesca subsp. vesca]	2.025	1.01803	8.45982e-06	0.000186517	yes	up
FxaC_8g13140	FxaC_8g13140	PREDICTED: uncharacterized protein LOC105349827 [Fragaria vesca subsp. vesca]	4.783	2.25805	8.5187e-06	0.000187382	yes	up
FxaC_14g22290	FxaC_14g22290	PREDICTED: uncharacterized protein LOC101313205 isoform X1 [Fragaria vesca subsp. vesca]	2.314	1.21022	8.53043e-06	0.000187568	yes	up
FxaC_5g30020	FxaC_5g30020	hypothetical protein CUMW_082080, partial [Citrus unshiu]	3.128	1.64538	8.56488e-06	0.000188253	yes	up
FxaC_6g08540	FxaC_6g08540	PREDICTED: UPF0496 protein At4g34320-like [Fragaria vesca subsp. vesca]	3.579	1.83966	8.58135e-06	0.000188543	yes	up
FxaC_23g49110	FxaC_23g49110	PREDICTED: gibberellin-regulated protein 14-like [Fragaria vesca subsp. vesca]	0.009	-6.82715	8.63904e-06	0.000189737	yes	down
FxaC_1g32800	FxaC_1g32800	PREDICTED: autophagy-related protein 8i-like [Fragaria vesca subsp. vesca]	0.473	-1.07996	8.65669e-06	0.000190052	yes	down
FxaC_7g07720	FxaC_7g07720	PREDICTED: beta-galactosidase 3-like [Fragaria vesca subsp. vesca]	0.274	-1.86607	8.6608e-06	0.000190069	yes	down
FxaC_2g33580	FxaC_2g33580	-	2.046	1.03311	8.69274e-06	0.000190478	yes	up
FxaC_27g29490	FxaC_27g29490	PREDICTED: bifunctional fucokinase/fucose pyrophosphorylase [Fragaria vesca subsp. vesca]	0.499	-1.00241	8.77295e-06	0.000192162	yes	down
FxaC_22g07190	FxaC_22g07190	PREDICTED: uncharacterized protein LOC101312757 [Fragaria vesca subsp. vesca]	2.454	1.29494	8.79331e-06	0.000192534	yes	up
FxaC_10g43120	FxaC_10g43120	PREDICTED: vacuolar cation/proton exchanger 3-like [Fragaria vesca subsp. vesca]	2.283	1.1909	8.84756e-06	0.0001935	yes	up
FxaC_9g11720	FxaC_9g11720	PREDICTED: scarecrow-like protein 30 [Fragaria vesca subsp. vesca]	2.515	1.33066	8.94899e-06	0.000195569	yes	up
FxaC_7g01480	FxaC_7g01480	PREDICTED: squalene monooxygenase-like [Fragaria vesca subsp. vesca]	2.815	1.49338	8.97106e-06	0.000195977	yes	up
FxaC_24g25130	FxaC_24g25130	PREDICTED: LOW QUALITY PROTEIN: probable F-box protein At1g60180 [Fragaria vesca subsp. vesca]	10.266	3.35977	9.13359e-06	0.000198996	yes	up
FxaC_1g29990	FxaC_1g29990	hypothetical protein VITISV_037504 [Vitis vinifera]	0.046	-4.44338	9.18538e-06	0.000199971	yes	down
FxaC_10g28690	FxaC_10g28690	PREDICTED: NAC domain-containing protein 90 [Fragaria vesca subsp. vesca]	7.082	2.82423	9.21573e-06	0.000200556	yes	up
FxaC_13g06090	FxaC_13g06090	PREDICTED: U-box domain-containing protein 11 [Fragaria vesca subsp. vesca]	0.335	-1.57987	9.33741e-06	0.000202742	yes	down
FxaC_26g02190	FxaC_26g02190	PREDICTED: CDGSH iron-sulfur domain-containing protein NEET [Fragaria vesca subsp. vesca]	3.223	1.68854	9.38099e-06	0.000203533	yes	up
FxaC_28g29950	FxaC_28g29950	PREDICTED: UDP-glucose 6-dehydrogenase 1-like [Fragaria vesca subsp. vesca]	0.367	-1.44606	9.44552e-06	0.000204778	yes	down
FxaC_8g37070	FxaC_8g37070	PREDICTED: serine carboxypeptidase-like 18 [Fragaria vesca subsp. vesca]	0.098	-3.34415	9.46152e-06	0.000205047	yes	down
FxaC_25g31840	FxaC_25g31840	PREDICTED: uncharacterized protein LOC101294106 [Fragaria vesca subsp. vesca]	0.487	-1.03684	9.59801e-06	0.000207769	yes	down
FxaC_26g04170	FxaC_26g04170	PREDICTED: cell division control protein 48-like [Fragaria vesca subsp. vesca]	2.908	1.54	9.6807e-06	0.000209401	yes	up
FxaC_6g07620	FxaC_6g07620	PREDICTED: plastid division protein PDV2-like [Fragaria vesca subsp. vesca]	0.445	-1.16826	9.70224e-06	0.000209708	yes	down
FxaC_7g40760	FxaC_7g40760	PREDICTED: gibberellin-regulated protein 1 [Fragaria vesca subsp. vesca]	0.451	-1.15018	9.7368e-06	0.000210276	yes	down
FxaC_22g60870	FxaC_22g60870	PREDICTED: uncharacterized protein LOC101303527 [Fragaria vesca subsp. vesca]	0.447	-1.16117	9.73952e-06	0.000210276	yes	down
FxaC_21g22010	FxaC_21g22010	PREDICTED: uncharacterized protein LOC101298156 [Fragaria vesca subsp. vesca]	2.093	1.06525	9.79108e-06	0.00021123	yes	up
FxaC_24g08280	FxaC_24g08280	PREDICTED: anthocyanidin 3-O-glucoside 2''-O-glucosyltransferase-like [Fragaria vesca subsp. vesca]	2.95	1.56048	9.86343e-06	0.00021255	yes	up
FxaC_3g10950	FxaC_3g10950	probable disease resistance protein At5g66900 [Rosa chinensis]	2.231	1.15749	9.90243e-06	0.00021331	yes	up
FxaC_8g11970	FxaC_8g11970	PREDICTED: probable serine/threonine-protein kinase At1g01540 [Fragaria vesca subsp. vesca]	0.451	-1.14941	9.93784e-06	0.000213955	yes	down
FxaC_3g12860	FxaC_3g12860	PREDICTED: thaumatin-like protein 1b [Fragaria vesca subsp. vesca]	2.204	1.14001	9.93984e-06	0.000213955	yes	up
FxaC_4g14450	FxaC_4g14450	PREDICTED: cyclic nucleotide-gated ion channel 1-like [Fragaria vesca subsp. vesca]	4.451	2.15401	9.95482e-06	0.000214197	yes	up
FxaC_10g11540	FxaC_10g11540	PREDICTED: fatty acid 2-hydroxylase 1-like [Fragaria vesca subsp. vesca]	0.405	-1.30428	1.00362e-05	0.000215826	yes	down
FxaC_7g13680	FxaC_7g13680	PREDICTED: mechanosensitive ion channel protein 6-like [Fragaria vesca subsp. vesca]	3.275	1.71139	1.00381e-05	0.000215826	yes	up
FxaC_27g28000	FxaC_27g28000	PREDICTED: probable inactive 2-oxoglutarate-dependent dioxygenase AOP2 [Fragaria vesca subsp. vesca]	7.971	2.99474	1.00816e-05	0.000216554	yes	up
FxaC_23g59800	FxaC_23g59800	PREDICTED: putative laccase-9 [Fragaria vesca subsp. vesca]	0.078	-3.68172	1.01896e-05	0.000218592	yes	down
FxaC_1g14040	FxaC_1g14040	PREDICTED: uncharacterized protein LOC101313247 [Fragaria vesca subsp. vesca]	0.488	-1.03457	1.02269e-05	0.000219227	yes	down
FxaC_24g07920	FxaC_24g07920	PREDICTED: uncharacterized protein LOC101296394 [Fragaria vesca subsp. vesca]	0.491	-1.02637	1.02522e-05	0.000219687	yes	down
FxaC_11g15330	FxaC_11g15330	PREDICTED: probable glutathione S-transferase [Fragaria vesca subsp. vesca]	0.488	-1.03564	1.03264e-05	0.000221111	yes	down
FxaC_8g37880	FxaC_8g37880	PREDICTED: squalene monooxygenase-like [Fragaria vesca subsp. vesca]	2.628	1.39397	1.03613e-05	0.000221693	yes	up
FxaC_8g34640	FxaC_8g34640	PREDICTED: replication factor C subunit 3 [Fragaria vesca subsp. vesca]	0.434	-1.2054	1.04563e-05	0.000223558	yes	down
FxaC_19g00310	FxaC_19g00310	PREDICTED: acid beta-fructofuranosidase-like [Fragaria vesca subsp. vesca]	0.038	-4.72685	1.07349e-05	0.000228831	yes	down
FxaC_26g27160	FxaC_26g27160	PREDICTED: putative lipid-binding protein At4g00165 [Fragaria vesca subsp. vesca]	0.226	-2.1465	1.08364e-05	0.000230648	yes	down
FxaC_20g20750	FxaC_20g20750	PREDICTED: transcription factor WER-like isoform X1 [Fragaria vesca subsp. vesca]	0.173	-2.53228	1.08419e-05	0.000230648	yes	down
FxaC_3g19120	FxaC_3g19120	PREDICTED: peroxidase 73 [Fragaria vesca subsp. vesca]	0.49	-1.03044	1.09088e-05	0.000231848	yes	down
FxaC_21g36100	FxaC_21g36100	PREDICTED: squamosa promoter-binding protein 1-like [Fragaria vesca subsp. vesca]	0.402	-1.31548	1.09358e-05	0.000232249	yes	down
FxaC_21g00600	FxaC_21g00600	PREDICTED: receptor-like protein kinase FERONIA [Fragaria vesca subsp. vesca]	2.052	1.03699	1.11063e-05	0.000235782	yes	up
FxaC_1g12510	FxaC_1g12510	GDSL esterase/lipase At3g14820-like [Rosa chinensis]	0.205	-2.28655	1.11265e-05	0.000236117	yes	down
FxaC_20g12460	FxaC_20g12460	PREDICTED: probable serine/threonine-protein kinase At1g18390 isoform X2 [Fragaria vesca subsp. vesca]	3.783	1.91968	1.11303e-05	0.000236117	yes	up
FxaC_5g18900	FxaC_5g18900	PREDICTED: putative glycine-rich cell wall structural protein 1 [Fragaria vesca subsp. vesca]	0.236	-2.08338	1.12139e-05	0.000237539	yes	down
FxaC_20g24630	FxaC_20g24630	PREDICTED: spermidine hydroxycinnamoyl transferase [Fragaria vesca subsp. vesca]	2.2	1.13729	1.12641e-05	0.000238512	yes	up
FxaC_15g30890	FxaC_15g30890	PREDICTED: serine carboxypeptidase-like 18 [Fragaria vesca subsp. vesca]	0.015	-6.04157	1.1273e-05	0.000238613	yes	down
FxaC_22g43120	FxaC_22g43120	hypothetical protein PanWU01x14_282010, partial [Parasponia andersonii]	2.675	1.41963	1.14586e-05	0.000242084	yes	up
FxaC_14g00570	FxaC_14g00570	PREDICTED: probable RNA helicase SDE3 [Fragaria vesca subsp. vesca]	2.042	1.03021	1.18287e-05	0.000248903	yes	up
FxaC_3g19540	FxaC_3g19540	PREDICTED: calcium-transporting ATPase 2, plasma membrane-type-like [Fragaria vesca subsp. vesca]	3.519	1.81535	1.18871e-05	0.00025004	yes	up
FxaC_9g24550	FxaC_9g24550	PREDICTED: F-box protein At2g27310-like [Fragaria vesca subsp. vesca]	2.839	1.50554	1.19725e-05	0.000251467	yes	up
FxaC_4g30310	FxaC_4g30310	PREDICTED: protein TIFY 3B [Fragaria vesca subsp. vesca]	2.078	1.05532	1.19994e-05	0.000251939	yes	up
FxaC_12g08780	FxaC_12g08780	PREDICTED: probable serine/threonine-protein kinase At5g41260 isoform X2 [Fragaria vesca subsp. vesca]	2.253	1.17182	1.20054e-05	0.000251972	yes	up
FxaC_27g51250	FxaC_27g51250	PREDICTED: probable plastid-lipid-associated protein 14, chloroplastic [Fragaria vesca subsp. vesca]	0.106	-3.23766	1.20978e-05	0.000253633	yes	down
FxaC_9g43620	FxaC_9g43620	LOW QUALITY PROTEIN: uncharacterized protein LOC110763204 [Prunus avium]	2.625	1.39249	1.21225e-05	0.000253965	yes	up
FxaC_9g45980	FxaC_9g45980	PREDICTED: auxin response factor 3 [Fragaria vesca subsp. vesca]	2.16	1.11105	1.21962e-05	0.000255322	yes	up
FxaC_26g22490	FxaC_26g22490	PREDICTED: uncharacterized protein LOC101303168 [Fragaria vesca subsp. vesca]	4.085	2.0304	1.23684e-05	0.000258832	yes	up
FxaC_6g45760	FxaC_6g45760	hypothetical protein TorRG33x02_015900 [Trema orientalis]	2.644	1.4027	1.2417e-05	0.000259658	yes	up
FxaC_20g34620	FxaC_20g34620	PREDICTED: beta-xylosidase/alpha-L-arabinofuranosidase 2-like isoform X1 [Fragaria vesca subsp. vesca]	0.276	-1.85888	1.27603e-05	0.000266351	yes	down
FxaC_21g08910	FxaC_21g08910	PREDICTED: uncharacterized protein LOC101312757 [Fragaria vesca subsp. vesca]	2.108	1.07618	1.27957e-05	0.000266897	yes	up
FxaC_23g56670	FxaC_23g56670	hypothetical protein RchiOBHm_Chr2g0159041 [Rosa chinensis]	0.426	-1.2305	1.29365e-05	0.000269582	yes	down
FxaC_22g67550	FxaC_22g67550	PREDICTED: phosphoenolpyruvate carboxylase kinase 1-like [Fragaria vesca subsp. vesca]	2.289	1.19496	1.29495e-05	0.000269711	yes	up
FxaC_5g32200	FxaC_5g32200	PREDICTED: beta-galactosidase 3-like [Fragaria vesca subsp. vesca]	0.479	-1.0621	1.29707e-05	0.000270053	yes	down
FxaC_19g01340	FxaC_19g01340	PREDICTED: bifunctional dTDP-4-dehydrorhamnose 3,5-epimerase/dTDP-4-dehydrorhamnose reductase [Fragaria vesca subsp. vesca]	0.4	-1.32251	1.30235e-05	0.000271055	yes	down
FxaC_19g39230	FxaC_19g39230	PREDICTED: probable beta-D-xylosidase 7 [Fragaria vesca subsp. vesca]	0.385	-1.37759	1.31767e-05	0.000274043	yes	down
FxaC_20g30630	FxaC_20g30630	PREDICTED: ferric reduction oxidase 7, chloroplastic-like [Fragaria vesca subsp. vesca]	0.364	-1.45664	1.32186e-05	0.000274816	yes	down
FxaC_7g07590	FxaC_7g07590	Atp1, partial (mitochondrion) [Spiraea sp. Qiu 05008]	0.216	-2.21208	1.32721e-05	0.000275828	yes	down
FxaC_8g08680	FxaC_8g08680	PREDICTED: lysine histidine transporter-like 8 [Fragaria vesca subsp. vesca]	80.253	6.32648	1.33164e-05	0.000276647	yes	up
FxaC_25g08890	FxaC_25g08890	PREDICTED: probable receptor-like protein kinase At5g39030 [Fragaria vesca subsp. vesca]	2.074	1.0525	1.33321e-05	0.000276872	yes	up
FxaC_6g02810	FxaC_6g02810	PREDICTED: uncharacterized protein LOC101307352 [Fragaria vesca subsp. vesca]	0.119	-3.06761	1.33722e-05	0.000277605	yes	down
FxaC_14g37860	FxaC_14g37860	PREDICTED: alternative oxidase 3, mitochondrial-like [Fragaria vesca subsp. vesca]	2.209	1.14366	1.34857e-05	0.000279253	yes	up
FxaC_19g32680	FxaC_19g32680	PREDICTED: protein NRT1/ PTR FAMILY 5.10-like [Fragaria vesca subsp. vesca]	0.475	-1.07382	1.36699e-05	0.000282555	yes	down
FxaC_13g03530	FxaC_13g03530	PREDICTED: polygalacturonase At1g48100 [Fragaria vesca subsp. vesca]	0.471	-1.08675	1.37585e-05	0.000284079	yes	down
FxaC_16g28820	FxaC_16g28820	PREDICTED: 1,4-dihydroxy-2-naphthoyl-CoA synthase, peroxisomal isoform X1 [Fragaria vesca subsp. vesca]	0.457	-1.12934	1.38099e-05	0.000284935	yes	down
FxaC_11g00570	FxaC_11g00570	PREDICTED: uncharacterized protein LOC101295895 [Fragaria vesca subsp. vesca]	2.107	1.075	1.40341e-05	0.000288727	yes	up
FxaC_9g16160	FxaC_9g16160	-	2.513	1.32964	1.42418e-05	0.000292461	yes	up
FxaC_11g39680	FxaC_11g39680	PREDICTED: lysosomal beta glucosidase-like [Fragaria vesca subsp. vesca]	0.47	-1.08959	1.43794e-05	0.000294983	yes	down
FxaC_21g25080	FxaC_21g25080	PREDICTED: putative receptor-like protein kinase At1g72540 [Fragaria vesca subsp. vesca]	6.298	2.65487	1.46159e-05	0.000299513	yes	up
FxaC_23g50900	FxaC_23g50900	PREDICTED: probable calcium-binding protein CML45 [Fragaria vesca subsp. vesca]	4.725	2.24024	1.47291e-05	0.000301509	yes	up
FxaC_25g31800	FxaC_25g31800	cyclic nucleotide-gated ion channel 1-like [Rosa chinensis]	2.923	1.54738	1.47975e-05	0.000302477	yes	up
FxaC_23g36650	FxaC_23g36650	PREDICTED: uncharacterized protein LOC101307509 [Fragaria vesca subsp. vesca]	0.498	-1.00461	1.48515e-05	0.000303364	yes	down
FxaC_9g22800	FxaC_9g22800	PREDICTED: non-specific phospholipase C2 [Fragaria vesca subsp. vesca]	0.188	-2.41054	1.5157e-05	0.000308723	yes	down
FxaC_4g01250	FxaC_4g01250	CoA ligase [Fragaria x ananassa]	2.337	1.2245	1.52897e-05	0.000311094	yes	up
FxaC_18g38950	FxaC_18g38950	PREDICTED: DNA-(apurinic or apyrimidinic site) lyase [Fragaria vesca subsp. vesca]	0.468	-1.09483	1.53867e-05	0.000312844	yes	down
FxaC_26g20440	FxaC_26g20440	transcriptional activator Myb [Fragaria vesca]	3.216	1.68537	1.54313e-05	0.000313469	yes	up
FxaC_9g05620	FxaC_9g05620	PREDICTED: probable inactive receptor kinase At5g58300 [Fragaria vesca subsp. vesca]	0.449	-1.15442	1.54339e-05	0.000313469	yes	down
FxaC_25g03440	FxaC_25g03440	PREDICTED: putative disease resistance RPP13-like protein 1 [Fragaria vesca subsp. vesca]	3.44	1.78252	1.54498e-05	0.000313682	yes	up
FxaC_11g20960	FxaC_11g20960	PREDICTED: putative receptor-like protein kinase At4g00960 isoform X2 [Fragaria vesca subsp. vesca]	3.881	1.95642	1.55776e-05	0.00031594	yes	up
FxaC_19g06870	FxaC_19g06870	PREDICTED: copper amine oxidase 1-like [Fragaria vesca subsp. vesca]	3.299	1.72194	1.56185e-05	0.000316659	yes	up
FxaC_17g53600	FxaC_17g53600	PREDICTED: probable LRR receptor-like serine/threonine-protein kinase At4g08850 isoform X1 [Fragaria vesca subsp. vesca]	3.111	1.63723	1.56504e-05	0.000317081	yes	up
FxaC_16g20930	FxaC_16g20930	PREDICTED: lipid phosphate phosphatase 2-like isoform X1 [Fragaria vesca subsp. vesca]	2.042	1.03012	1.56623e-05	0.000317209	yes	up
FxaC_4g32060	FxaC_4g32060	PREDICTED: protein ELF4-LIKE 3 [Fragaria vesca subsp. vesca]	0.48	-1.05977	1.56982e-05	0.000317823	yes	down
FxaC_10g30280	FxaC_10g30280	PREDICTED: non-specific lipid transfer protein GPI-anchored 2 [Fragaria vesca subsp. vesca]	0.357	-1.48682	1.57222e-05	0.000317995	yes	down
FxaC_11g04760	FxaC_11g04760	precursor of CEP14 [Rosa chinensis]	3.35	1.74427	1.57233e-05	0.000317995	yes	up
FxaC_17g53500	FxaC_17g53500	PREDICTED: uncharacterized protein LOC101299013 [Fragaria vesca subsp. vesca]	0.354	-1.49894	1.57777e-05	0.000318757	yes	down
FxaC_6g31710	FxaC_6g31710	PREDICTED: WAT1-related protein At1g21890-like [Fragaria vesca subsp. vesca]	3.316	1.72937	1.60634e-05	0.000323842	yes	up
FxaC_10g28070	FxaC_10g28070	PREDICTED: transcription factor TGA6 isoform X2 [Fragaria vesca subsp. vesca]	4.41	2.14089	1.61914e-05	0.000325735	yes	up
FxaC_21g67240	FxaC_21g67240	PREDICTED: uncharacterized protein LOC101299777 [Fragaria vesca subsp. vesca]	4.556	2.18767	1.63108e-05	0.000327675	yes	up
FxaC_22g72790	FxaC_22g72790	PREDICTED: alanine--glyoxylate aminotransferase 2 homolog 2, mitochondrial [Fragaria vesca subsp. vesca]	3.019	1.59398	1.63664e-05	0.000328656	yes	up
FxaC_16g29040	FxaC_16g29040	-	2.172	1.11874	1.64162e-05	0.000329445	yes	up
FxaC_3g24090	FxaC_3g24090	PREDICTED: annexin D1-like [Fragaria vesca subsp. vesca]	0.48	-1.05806	1.65514e-05	0.00033181	yes	down
FxaC_16g30400	FxaC_16g30400	PREDICTED: protein NRT1/ PTR FAMILY 2.13-like [Fragaria vesca subsp. vesca]	3.142	1.6517	1.66071e-05	0.000332811	yes	up
FxaC_7g14930	FxaC_7g14930	PREDICTED: receptor-like protein kinase THESEUS 1 [Fragaria vesca subsp. vesca]	0.374	-1.42013	1.6718e-05	0.000334722	yes	down
FxaC_9g47550	FxaC_9g47550	uncharacterized protein LOC112165286 isoform X1 [Rosa chinensis]	2.92	1.54593	1.672e-05	0.000334722	yes	up
FxaC_27g11830	FxaC_27g11830	PREDICTED: cyclin-U4-1 [Fragaria vesca subsp. vesca]	0.319	-1.64691	1.68932e-05	0.000337952	yes	down
FxaC_13g51450	FxaC_13g51450	-	0.384	-1.38225	1.69106e-05	0.000338081	yes	down
FxaC_23g59250	FxaC_23g59250	PREDICTED: glucose-6-phosphate 1-dehydrogenase, chloroplastic-like [Fragaria vesca subsp. vesca]	0.061	-4.0302	1.69572e-05	0.000338877	yes	down
FxaC_25g26390	FxaC_25g26390	P-type ATPase [Parasponia andersonii]	2.534	1.34156	1.70735e-05	0.000340997	yes	up
FxaC_22g57390	FxaC_22g57390	PREDICTED: ferritin-3, chloroplastic [Fragaria vesca subsp. vesca]	4.293	2.10189	1.70752e-05	0.000340997	yes	up
FxaC_22g61850	FxaC_22g61850	PREDICTED: probable protein phosphatase 2C 34 [Fragaria vesca subsp. vesca]	0.361	-1.46853	1.74131e-05	0.000347018	yes	down
FxaC_25g19170	FxaC_25g19170	PREDICTED: BON1-associated protein 1 [Fragaria vesca subsp. vesca]	5.826	2.54252	1.74417e-05	0.000347412	yes	up
FxaC_22g02220	FxaC_22g02220	PREDICTED: beta-glucosidase 24-like [Fragaria vesca subsp. vesca]	2.177	1.12202	1.75482e-05	0.000349347	yes	up
FxaC_27g44160	FxaC_27g44160	PREDICTED: putative disease resistance protein At3g14460 isoform X3 [Fragaria vesca subsp. vesca]	2.057	1.04081	1.75601e-05	0.000349463	yes	up
FxaC_25g32650	FxaC_25g32650	PREDICTED: uncharacterized protein LOC101303168 [Fragaria vesca subsp. vesca]	4.587	2.19762	1.76415e-05	0.000350959	yes	up
FxaC_5g27350	FxaC_5g27350	PREDICTED: putative laccase-9 [Fragaria vesca subsp. vesca]	0.054	-4.22142	1.80422e-05	0.000357936	yes	down
FxaC_13g33120	FxaC_13g33120	PREDICTED: uncharacterized protein LOC101305932 [Fragaria vesca subsp. vesca]	0.115	-3.11551	1.80629e-05	0.000358222	yes	down
FxaC_17g12730	FxaC_17g12730	PREDICTED: probable serine/threonine-protein kinase At1g18390 isoform X2 [Fragaria vesca subsp. vesca]	2.639	1.39982	1.80787e-05	0.000358411	yes	up
FxaC_22g43270	FxaC_22g43270	PREDICTED: 125 kDa kinesin-related protein isoform X2 [Fragaria vesca subsp. vesca]	0.306	-1.70872	1.82327e-05	0.000360965	yes	down
FxaC_23g32050	FxaC_23g32050	putative leucine-rich repeat-containing, plant-type, leucine-rich repeat domain, L [Rosa chinensis]	5.777	2.53034	1.84808e-05	0.000365372	yes	up
FxaC_14g12460	FxaC_14g12460	PREDICTED: E3 ubiquitin-protein ligase RGLG2-like [Fragaria vesca subsp. vesca]	9.624	3.26669	1.88083e-05	0.000371332	yes	up
FxaC_28g03140	FxaC_28g03140	PREDICTED: probable WRKY transcription factor 41 [Fragaria vesca subsp. vesca]	4.299	2.10399	1.88229e-05	0.000371493	yes	up
FxaC_1g03160	FxaC_1g03160	PREDICTED: fasciclin-like arabinogalactan protein 13 [Fragaria vesca subsp. vesca]	0.013	-6.27803	1.88727e-05	0.000372347	yes	down
FxaC_9g37620	FxaC_9g37620	PREDICTED: cytochrome P450 72A15-like [Fragaria vesca subsp. vesca]	2.362	1.24015	1.90618e-05	0.000375819	yes	up
FxaC_6g37330	FxaC_6g37330	PREDICTED: graves disease carrier protein [Fragaria vesca subsp. vesca]	2.03	1.02159	1.9188e-05	0.000377865	yes	up
FxaC_22g08390	FxaC_22g08390	putative protein kinase RLK-Pelle-CrRLK1L-1 family [Rosa chinensis]	2.032	1.02303	1.93038e-05	0.000379674	yes	up
FxaC_11g45430	FxaC_11g45430	PREDICTED: uncharacterized protein LOC101303311 [Fragaria vesca subsp. vesca]	2.05	1.03569	1.93199e-05	0.00037986	yes	up
FxaC_28g26760	FxaC_28g26760	NADH-plastoquinone oxidoreductase subunit 1, partial (plastid) [Fragaria iturupensis]	0.084	-3.57534	1.95928e-05	0.000384565	yes	down
FxaC_13g19470	FxaC_13g19470	PREDICTED: high affinity nitrate transporter 2.5-like [Fragaria vesca subsp. vesca]	2.149	1.10356	1.96436e-05	0.000385299	yes	up
FxaC_11g12420	FxaC_11g12420	PREDICTED: receptor-like protein 12 [Fragaria vesca subsp. vesca]	2.061	1.04364	1.96932e-05	0.000386007	yes	up
FxaC_6g37170	FxaC_6g37170	PREDICTED: LOW QUALITY PROTEIN: cell division control protein 48 homolog C [Fragaria vesca subsp. vesca]	2.159	1.11069	1.98081e-05	0.000387596	yes	up
FxaC_2g07610	FxaC_2g07610	PREDICTED: uncharacterized protein LOC101303940 [Fragaria vesca subsp. vesca]	2.029	1.02068	1.99254e-05	0.000389491	yes	up
FxaC_13g33380	FxaC_13g33380	PREDICTED: uncharacterized protein LOC101310110 [Fragaria vesca subsp. vesca]	2.21	1.14404	1.999e-05	0.000390621	yes	up
FxaC_20g29350	FxaC_20g29350	PREDICTED: probable inorganic phosphate transporter 1-9 [Fragaria vesca subsp. vesca]	2.07	1.04941	2.01503e-05	0.000393215	yes	up
FxaC_22g58780	FxaC_22g58780	PREDICTED: uncharacterized protein LOC101304886 [Fragaria vesca subsp. vesca]	2.181	1.12514	2.02181e-05	0.00039427	yes	up
FxaC_2g29810	FxaC_2g29810	PREDICTED: transmembrane protein 136 [Fragaria vesca subsp. vesca]	0.401	-1.31737	2.02319e-05	0.00039436	yes	down
FxaC_16g03830	FxaC_16g03830	PREDICTED: phosphate transporter PHO1 [Fragaria vesca subsp. vesca]	2.947	1.55931	2.04868e-05	0.000398154	yes	up
FxaC_5g07320	FxaC_5g07320	PREDICTED: probable calcium-binding protein CML44 isoform X1 [Fragaria vesca subsp. vesca]	3.916	1.96942	2.05612e-05	0.000399464	yes	up
FxaC_23g42990	FxaC_23g42990	PREDICTED: cytochrome P450 714C2-like [Fragaria vesca subsp. vesca]	3.073	1.61962	2.08623e-05	0.000405176	yes	up
FxaC_27g12500	FxaC_27g12500	PREDICTED: receptor-like protein 12 [Fragaria vesca subsp. vesca]	5.244	2.39074	2.09094e-05	0.000405952	yes	up
FxaC_19g11540	FxaC_19g11540	hypothetical protein PRUPE_5G125600 [Prunus persica]	2.959	1.56502	2.09351e-05	0.000406287	yes	up
FxaC_9g38840	FxaC_9g38840	PREDICTED: putative serine/threonine-protein kinase [Fragaria vesca subsp. vesca]	2.053	1.03748	2.09408e-05	0.000406287	yes	up
FxaC_23g08460	FxaC_23g08460	PREDICTED: root phototropism protein 3-like [Fragaria vesca subsp. vesca]	0.449	-1.15545	2.09517e-05	0.000406361	yes	down
FxaC_9g02580	FxaC_9g02580	PREDICTED: receptor-like protein 2 [Fragaria vesca subsp. vesca]	2.727	1.44716	2.09649e-05	0.000406479	yes	up
FxaC_6g37180	FxaC_6g37180	PREDICTED: probable WRKY transcription factor 50 [Fragaria vesca subsp. vesca]	2.165	1.1146	2.10946e-05	0.000408164	yes	up
FxaC_13g35900	FxaC_13g35900	CASP-like protein 1E1 [Rosa chinensis]	0.316	-1.66363	2.1318e-05	0.000411929	yes	down
FxaC_8g12870	FxaC_8g12870	PREDICTED: zinc finger protein ZAT10 [Fragaria vesca subsp. vesca]	2.09	1.06384	2.15576e-05	0.000415463	yes	up
FxaC_14g16120	FxaC_14g16120	PREDICTED: indole-3-acetic acid-amido synthetase GH3.17-like [Fragaria vesca subsp. vesca]	0.206	-2.27925	2.16828e-05	0.000417289	yes	down
FxaC_26g31150	FxaC_26g31150	PREDICTED: UDP-glucose 6-dehydrogenase 1-like [Fragaria vesca subsp. vesca]	0.481	-1.05669	2.17988e-05	0.000419238	yes	down
FxaC_9g01140	FxaC_9g01140	PREDICTED: probable leucine-rich repeat receptor-like protein kinase At1g35710 [Fragaria vesca subsp. vesca]	15.337	3.9389	2.1821e-05	0.000419524	yes	up
FxaC_13g17800	FxaC_13g17800	PREDICTED: probable receptor-like protein kinase At1g67000 [Fragaria vesca subsp. vesca]	3.902	1.96427	2.22684e-05	0.000427552	yes	up
FxaC_17g48910	FxaC_17g48910	PREDICTED: MATE efflux family protein 5 [Fragaria vesca subsp. vesca]	2.157	1.10916	2.23665e-05	0.000429003	yes	up
FxaC_26g35390	FxaC_26g35390	PREDICTED: cationic amino acid transporter 7, chloroplastic-like [Fragaria vesca subsp. vesca]	0.434	-1.20542	2.24506e-05	0.000430472	yes	down
FxaC_26g18940	FxaC_26g18940	PREDICTED: probable pectate lyase 13 [Fragaria vesca subsp. vesca]	0.329	-1.60473	2.246e-05	0.000430508	yes	down
FxaC_6g45940	FxaC_6g45940	PREDICTED: probable transcription factor KAN4 [Fragaria vesca subsp. vesca]	0.446	-1.16608	2.24885e-05	0.000430911	yes	down
FxaC_15g16920	FxaC_15g16920	PREDICTED: PI-PLC X-box domain-containing protein DDB_G0293730-like [Fragaria vesca subsp. vesca]	0.403	-1.31253	2.25736e-05	0.000431962	yes	down
FxaC_25g31930	FxaC_25g31930	PREDICTED: dehydration-responsive protein RD22-like [Fragaria vesca subsp. vesca]	5.552	2.47299	2.27642e-05	0.000434883	yes	up
FxaC_14g33270	FxaC_14g33270	PREDICTED: anthocyanidin 3-O-glucosyltransferase 7-like [Fragaria vesca subsp. vesca]	2.451	1.29315	2.28836e-05	0.000436872	yes	up
FxaC_27g16900	FxaC_27g16900	PREDICTED: protein ECERIFERUM 1-like [Fragaria vesca subsp. vesca]	0.265	-1.91381	2.29703e-05	0.000438382	yes	down
FxaC_19g03390	FxaC_19g03390	PREDICTED: triacylglycerol lipase 2-like [Fragaria vesca subsp. vesca]	2.839	1.50539	2.29862e-05	0.000438539	yes	up
FxaC_23g50260	FxaC_23g50260	PREDICTED: protein vip1-like [Fragaria vesca subsp. vesca]	0.472	-1.08195	2.31268e-05	0.000441043	yes	down
FxaC_16g06010	FxaC_16g06010	PREDICTED: phospholipase A2-alpha isoform X1 [Fragaria vesca subsp. vesca]	0.25	-2.00244	2.34644e-05	0.000446175	yes	down
FxaC_15g15190	FxaC_15g15190	F-box protein At1g67340 [Rosa chinensis]	2.196	1.13461	2.36453e-05	0.000449315	yes	up
FxaC_24g10270	FxaC_24g10270	PREDICTED: WW domain-containing protein WWM1-like [Fragaria vesca subsp. vesca]	2.25	1.16991	2.37307e-05	0.000450788	yes	up
FxaC_15g11810	FxaC_15g11810	PREDICTED: uncharacterized protein LOC101213918 [Cucumis sativus]	3.063	1.61482	2.38858e-05	0.000453089	yes	up
FxaC_15g11860	FxaC_15g11860	PREDICTED: uncharacterized protein LOC101213918 [Cucumis sativus]	3.063	1.61482	2.38858e-05	0.000453089	yes	up
FxaC_7g25280	FxaC_7g25280	PREDICTED: potassium transporter 5-like [Fragaria vesca subsp. vesca]	17.867	4.15919	2.39268e-05	0.00045361	yes	up
FxaC_17g31720	FxaC_17g31720	PREDICTED: uncharacterized protein LOC101302456 [Fragaria vesca subsp. vesca]	3.036	1.60217	2.39731e-05	0.000454338	yes	up
FxaC_26g33970	FxaC_26g33970	PREDICTED: probable receptor-like protein kinase At1g67000 isoform X1 [Fragaria vesca subsp. vesca]	2.871	1.52169	2.3999e-05	0.000454679	yes	up
FxaC_5g35920	FxaC_5g35920	PREDICTED: uncharacterized protein LOC101305922 [Fragaria vesca subsp. vesca]	4.262	2.09138	2.40105e-05	0.000454746	yes	up
FxaC_1g34030	FxaC_1g34030	PREDICTED: uncharacterized protein LOC101314888 [Fragaria vesca subsp. vesca]	0.411	-1.28347	2.41115e-05	0.000456508	yes	down
FxaC_28g19030	FxaC_28g19030	PREDICTED: transcription factor MYC2 [Fragaria vesca subsp. vesca]	0.321	-1.63845	2.42202e-05	0.000458414	yes	down
FxaC_10g11800	FxaC_10g11800	PREDICTED: protein LIGHT-DEPENDENT SHORT HYPOCOTYLS 4-like [Fragaria vesca subsp. vesca]	5.25	2.39242	2.42702e-05	0.000459004	yes	up
FxaC_19g01190	FxaC_19g01190	PREDICTED: probable sugar phosphate/phosphate translocator At1g12500 [Fragaria vesca subsp. vesca]	0.386	-1.37471	2.43483e-05	0.000460078	yes	down
FxaC_10g23470	FxaC_10g23470	PREDICTED: indole-3-acetic acid-amido synthetase GH3.6 [Fragaria vesca subsp. vesca]	4.559	2.18884	2.44261e-05	0.000461237	yes	up
FxaC_24g58060	FxaC_24g58060	PREDICTED: 2-aminoethanethiol dioxygenase-like [Fragaria vesca subsp. vesca]	0.435	-1.19959	2.45932e-05	0.000463786	yes	down
FxaC_24g41740	FxaC_24g41740	PREDICTED: transcription factor MYB82-like [Fragaria vesca subsp. vesca]	0.01	-6.66683	2.47813e-05	0.000466873	yes	down
FxaC_18g37650	FxaC_18g37650	PREDICTED: glutamic acid-rich protein-like [Fragaria vesca subsp. vesca]	2.134	1.09373	2.48685e-05	0.000468196	yes	up
FxaC_28g14140	FxaC_28g14140	PREDICTED: zinc finger protein ZAT12-like [Fragaria vesca subsp. vesca]	9.436	3.23825	2.50851e-05	0.000471665	yes	up
FxaC_6g37530	FxaC_6g37530	PREDICTED: delta(8)-fatty-acid desaturase 1-like [Fragaria vesca subsp. vesca]	0.261	-1.93837	2.54413e-05	0.000478047	yes	down
FxaC_26g22470	FxaC_26g22470	PREDICTED: uncharacterized protein LOC101306460 [Fragaria vesca subsp. vesca]	3.132	1.64694	2.55476e-05	0.000479834	yes	up
FxaC_23g18430	FxaC_23g18430	PREDICTED: RING finger protein 10-like [Fragaria vesca subsp. vesca]	2.734	1.45096	2.5711e-05	0.000482165	yes	up
FxaC_7g10020	FxaC_7g10020	PREDICTED: laccase-14-like [Fragaria vesca subsp. vesca]	0.03	-5.03763	2.58266e-05	0.000483858	yes	down
FxaC_20g02640	FxaC_20g02640	PREDICTED: kinesin-4 isoform X2 [Fragaria vesca subsp. vesca]	0.408	-1.29211	2.60597e-05	0.00048805	yes	down
FxaC_8g39500	FxaC_8g39500	PREDICTED: uncharacterized protein LOC101304340 [Fragaria vesca subsp. vesca]	0.221	-2.17668	2.60701e-05	0.00048805	yes	down
FxaC_9g51520	FxaC_9g51520	PREDICTED: protein ODORANT1-like [Fragaria vesca subsp. vesca]	3.405	1.76754	2.63969e-05	0.000493411	yes	up
FxaC_6g31690	FxaC_6g31690	PREDICTED: WAT1-related protein At4g08290 [Fragaria vesca subsp. vesca]	12.845	3.68318	2.64511e-05	0.000494264	yes	up
FxaC_8g00470	FxaC_8g00470	PREDICTED: transcription factor TT2-like [Fragaria vesca subsp. vesca]	52.761	5.7214	2.64815e-05	0.00049467	yes	up
FxaC_12g23800	FxaC_12g23800	PREDICTED: F-box protein At2g27310-like [Fragaria vesca subsp. vesca]	2.838	1.50508	2.65836e-05	0.000496091	yes	up
FxaC_6g44180	FxaC_6g44180	PREDICTED: alcohol dehydrogenase-like 7 [Fragaria vesca subsp. vesca]	0.34	-1.55698	2.68065e-05	0.000499437	yes	down
FxaC_5g33630	FxaC_5g33630	PREDICTED: UPF0496 protein At4g34320-like [Fragaria vesca subsp. vesca]	2.376	1.24834	2.68994e-05	0.000501004	yes	up
FxaC_5g34870	FxaC_5g34870	PREDICTED: cold-regulated 413 plasma membrane protein 1 [Fragaria vesca subsp. vesca]	0.454	-1.13816	2.72424e-05	0.000506568	yes	down
FxaC_21g39000	FxaC_21g39000	PREDICTED: outer envelope pore protein 16-3, chloroplastic/mitochondrial [Fragaria vesca subsp. vesca]	0.463	-1.11149	2.7348e-05	0.000508367	yes	down
FxaC_16g15160	FxaC_16g15160	PREDICTED: sugar transport protein 13 [Fragaria vesca subsp. vesca]	2.627	1.39357	2.75369e-05	0.000511547	yes	up
FxaC_18g20730	FxaC_18g20730	PREDICTED: cellulose synthase-like protein D3 [Fragaria vesca subsp. vesca]	0.478	-1.06416	2.79833e-05	0.000519165	yes	down
FxaC_5g03370	FxaC_5g03370	PREDICTED: LOW QUALITY PROTEIN: cell division control protein 48 homolog C [Fragaria vesca subsp. vesca]	2.102	1.07208	2.84045e-05	0.000526467	yes	up
FxaC_15g25770	FxaC_15g25770	PREDICTED: vacuolar amino acid transporter 1 isoform X2 [Fragaria vesca subsp. vesca]	3.102	1.63337	2.84274e-05	0.000526551	yes	up
FxaC_7g20680	FxaC_7g20680	PREDICTED: probable methyltransferase PMT3 [Fragaria vesca subsp. vesca]	0.479	-1.06168	2.87392e-05	0.000531811	yes	down
FxaC_26g05430	FxaC_26g05430	PREDICTED: RNA polymerase sigma factor sigE, chloroplastic/mitochondrial [Fragaria vesca subsp. vesca]	2.349	1.23199	2.91303e-05	0.000538873	yes	up
FxaC_16g04630	FxaC_16g04630	PREDICTED: cysteine-rich repeat secretory protein 3 isoform X1 [Fragaria vesca subsp. vesca]	0.375	-1.41389	2.93867e-05	0.000542738	yes	down
FxaC_17g36960	FxaC_17g36960	PREDICTED: probable leucine-rich repeat receptor-like protein kinase At5g49770 [Fragaria vesca subsp. vesca]	2.413	1.27109	2.95134e-05	0.000544552	yes	up
FxaC_10g14280	FxaC_10g14280	PREDICTED: vacuolar-sorting receptor 6 [Fragaria vesca subsp. vesca]	3.092	1.62856	2.97916e-05	0.000549331	yes	up
FxaC_16g23740	FxaC_16g23740	putative GDP-fucose protein O-fucosyltransferase [Rosa chinensis]	0.338	-1.56634	3.00667e-05	0.000554047	yes	down
FxaC_21g60600	FxaC_21g60600	uncharacterized protein LOC112195242 isoform X6 [Rosa chinensis]	0.487	-1.03948	3.04605e-05	0.000560762	yes	down
FxaC_23g61360	FxaC_23g61360	PREDICTED: aspartic proteinase nepenthesin-2 [Fragaria vesca subsp. vesca]	2.59	1.37308	3.10297e-05	0.00057014	yes	up
FxaC_8g16400	FxaC_8g16400	PREDICTED: zinc finger CCCH domain-containing protein 31 [Fragaria vesca subsp. vesca]	2.07	1.04995	3.11522e-05	0.000571657	yes	up
FxaC_27g52120	FxaC_27g52120	PREDICTED: two-component response regulator-like APRR5 [Fragaria vesca subsp. vesca]	2.263	1.17843	3.12996e-05	0.000573809	yes	up
FxaC_24g44000	FxaC_24g44000	PREDICTED: GDSL esterase/lipase 5 [Fragaria vesca subsp. vesca]	0.357	-1.48406	3.15968e-05	0.000578887	yes	down
FxaC_12g43420	FxaC_12g43420	-	0.471	-1.08586	3.16899e-05	0.000580407	yes	down
FxaC_13g37210	FxaC_13g37210	PREDICTED: uncharacterized protein LOC101312339 [Fragaria vesca subsp. vesca]	0.131	-2.93269	3.21822e-05	0.000589065	yes	down
FxaC_18g31340	FxaC_18g31340	PREDICTED: uncharacterized protein LOC105351523 [Fragaria vesca subsp. vesca]	0.366	-1.45174	3.21832e-05	0.000589065	yes	down
FxaC_6g13310	FxaC_6g13310	PREDICTED: uncharacterized protein LOC105349701 [Fragaria vesca subsp. vesca]	0.406	-1.30027	3.23444e-05	0.000591637	yes	down
FxaC_6g45880	FxaC_6g45880	PREDICTED: allene oxide synthase [Fragaria vesca subsp. vesca]	2.114	1.08024	3.24061e-05	0.000592413	yes	up
FxaC_15g40320	FxaC_15g40320	PREDICTED: protein tesmin/TSO1-like CXC 2 [Fragaria vesca subsp. vesca]	0.435	-1.19928	3.24075e-05	0.000592413	yes	down
FxaC_27g21270	FxaC_27g21270	PREDICTED: fasciclin-like arabinogalactan protein 10 [Fragaria vesca subsp. vesca]	0.294	-1.76498	3.25323e-05	0.000593936	yes	down
FxaC_16g20840	FxaC_16g20840	PREDICTED: putative zinc finger protein At1g68190 isoform X1 [Fragaria vesca subsp. vesca]	0.285	-1.80913	3.25904e-05	0.000594735	yes	down
FxaC_24g22640	FxaC_24g22640	PREDICTED: GDSL esterase/lipase At5g03810-like [Fragaria vesca subsp. vesca]	0.314	-1.67335	3.26484e-05	0.000595295	yes	down
FxaC_12g39510	FxaC_12g39510	PREDICTED: cannabidiolic acid synthase-like 1 [Fragaria vesca subsp. vesca]	2.378	1.24965	3.27743e-05	0.000597399	yes	up
FxaC_25g11490	FxaC_25g11490	PREDICTED: FK506-binding protein 4-like [Fragaria vesca subsp. vesca]	0.012	-6.3958	3.28094e-05	0.000597659	yes	down
FxaC_18g35910	FxaC_18g35910	PREDICTED: metal tolerance protein 1 [Fragaria vesca subsp. vesca]	0.409	-1.2901	3.29721e-05	0.000600432	yes	down
FxaC_19g13520	FxaC_19g13520	PREDICTED: probable WRKY transcription factor 61 [Fragaria vesca subsp. vesca]	10.26	3.35893	3.32189e-05	0.000604337	yes	up
FxaC_24g57960	FxaC_24g57960	PREDICTED: probable receptor-like protein kinase At5g15080 isoform X3 [Fragaria vesca subsp. vesca]	0.063	-3.99866	3.33402e-05	0.00060594	yes	down
FxaC_8g08440	FxaC_8g08440	PREDICTED: ganglioside-induced differentiation-associated protein 2-like [Fragaria vesca subsp. vesca]	0.451	-1.14818	3.35036e-05	0.000608175	yes	down
FxaC_17g20790	FxaC_17g20790	PREDICTED: probable mitochondrial chaperone BCS1-B [Fragaria vesca subsp. vesca]	0.32	-1.64279	3.37585e-05	0.000611638	yes	down
FxaC_11g13790	FxaC_11g13790	PREDICTED: glyceraldehyde-3-phosphate dehydrogenase GAPCP1, chloroplastic [Fragaria vesca subsp. vesca]	2.227	1.1553	3.40221e-05	0.000616024	yes	up
FxaC_22g13740	FxaC_22g13740	PREDICTED: PLASMODESMATA CALLOSE-BINDING PROTEIN 5 [Fragaria vesca subsp. vesca]	0.197	-2.34699	3.41438e-05	0.000618034	yes	down
FxaC_21g11160	FxaC_21g11160	PREDICTED: protein trichome birefringence-like 19 [Fragaria vesca subsp. vesca]	0.489	-1.03265	3.41743e-05	0.000618381	yes	down
FxaC_20g00200	FxaC_20g00200	PREDICTED: monocopper oxidase-like protein SKU5 [Fragaria vesca subsp. vesca]	0.35	-1.51338	3.42836e-05	0.000619975	yes	down
FxaC_24g29070	FxaC_24g29070	polygalacturonase inhibitor-like [Rosa chinensis]	0.153	-2.7108	3.47096e-05	0.000626886	yes	down
FxaC_4g31760	FxaC_4g31760	PREDICTED: MOB kinase activator-like 1 [Fragaria vesca subsp. vesca]	0.123	-3.0224	3.47398e-05	0.000627235	yes	down
FxaC_22g12430	FxaC_22g12430	PREDICTED: cellulose synthase-like protein H1 isoform X2 [Fragaria vesca subsp. vesca]	0.24	-2.05643	3.47723e-05	0.000627425	yes	down
FxaC_9g34280	FxaC_9g34280	PREDICTED: lactoylglutathione lyase-like [Fragaria vesca subsp. vesca]	2.274	1.18497	3.49633e-05	0.000630673	yes	up
FxaC_7g12950	FxaC_7g12950	PREDICTED: serine carboxypeptidase-like 42 [Fragaria vesca subsp. vesca]	0.278	-1.84581	3.53113e-05	0.00063655	yes	down
FxaC_22g20320	FxaC_22g20320	PREDICTED: RING-H2 finger protein ATL3-like [Fragaria vesca subsp. vesca]	2.719	1.44289	3.53804e-05	0.000637393	yes	up
FxaC_26g41130	FxaC_26g41130	PREDICTED: cycloartenol-C-24-methyltransferase [Fragaria vesca subsp. vesca]	0.412	-1.27864	3.54289e-05	0.000638066	yes	down
FxaC_11g13370	FxaC_11g13370	PREDICTED: probable leucine-rich repeat receptor-like protein kinase At1g35710 [Fragaria vesca subsp. vesca]	3.335	1.7376	3.5857e-05	0.000644953	yes	up
FxaC_24g54890	FxaC_24g54890	PREDICTED: proline dehydrogenase 2, mitochondrial [Fragaria vesca subsp. vesca]	2.985	1.57786	3.62931e-05	0.000650968	yes	up
FxaC_13g34310	FxaC_13g34310	PREDICTED: cyclic nucleotide-gated ion channel 1-like [Fragaria vesca subsp. vesca]	0.463	-1.11021	3.63706e-05	0.000652153	yes	down
FxaC_9g48560	FxaC_9g48560	PREDICTED: uncharacterized protein LOC101302052 [Fragaria vesca subsp. vesca]	0.449	-1.15538	3.64724e-05	0.000653364	yes	down
FxaC_10g11610	FxaC_10g11610	PREDICTED: mediator of RNA polymerase II transcription subunit 25-like [Fragaria vesca subsp. vesca]	2.481	1.31103	3.67699e-05	0.000658282	yes	up
FxaC_14g07010	FxaC_14g07010	PREDICTED: uncharacterized protein At5g01610 [Fragaria vesca subsp. vesca]	0.411	-1.28351	3.68064e-05	0.000658644	yes	down
FxaC_18g42730	FxaC_18g42730	PREDICTED: uncharacterized protein LOC101297936 [Fragaria vesca subsp. vesca]	4.687	2.2287	3.69002e-05	0.000659582	yes	up
FxaC_10g10580	FxaC_10g10580	PREDICTED: BAG family molecular chaperone regulator 3-like [Fragaria vesca subsp. vesca]	0.472	-1.08399	3.69197e-05	0.000659725	yes	down
FxaC_13g00700	FxaC_13g00700	PREDICTED: uncharacterized protein LOC101299180 [Fragaria vesca subsp. vesca]	2.234	1.15988	3.69792e-05	0.000660376	yes	up
FxaC_21g00050	FxaC_21g00050	PREDICTED: G-type lectin S-receptor-like serine/threonine-protein kinase B120 isoform X1 [Fragaria vesca subsp. vesca]	2.511	1.32802	3.70573e-05	0.000661563	yes	up
FxaC_8g13640	FxaC_8g13640	PREDICTED: transcription factor bHLH74 [Fragaria vesca subsp. vesca]	0.453	-1.1428	3.71412e-05	0.000662689	yes	down
FxaC_23g61290	FxaC_23g61290	PREDICTED: GDSL esterase/lipase At2g42990 [Fragaria vesca subsp. vesca]	0.215	-2.22055	3.72572e-05	0.00066451	yes	down
FxaC_15g09090	FxaC_15g09090	PREDICTED: putative phospholipid-transporting ATPase 9 [Fragaria vesca subsp. vesca]	2.238	1.16215	3.73907e-05	0.000666684	yes	up
FxaC_17g02930	FxaC_17g02930	PREDICTED: cytochrome P450 86A7 [Fragaria vesca subsp. vesca]	0.386	-1.3732	3.78514e-05	0.000674059	yes	down
FxaC_22g24380	FxaC_22g24380	ankyrin repeat-containing protein ITN1-like [Rosa chinensis]	2.117	1.08205	3.82311e-05	0.000679371	yes	up
FxaC_27g07710	FxaC_27g07710	PREDICTED: receptor-like protein 12 [Fragaria vesca subsp. vesca]	3.603	1.84916	3.82328e-05	0.000679371	yes	up
FxaC_18g30960	FxaC_18g30960	PREDICTED: probable calcium-binding protein CML47 [Fragaria vesca subsp. vesca]	6.401	2.67821	3.84696e-05	0.000682519	yes	up
FxaC_3g08670	FxaC_3g08670	PREDICTED: 12-oxophytodienoate reductase 3-like [Fragaria vesca subsp. vesca]	2.457	1.29668	3.86031e-05	0.000684463	yes	up
FxaC_16g31430	FxaC_16g31430	ATP-dependent Clp protease adapter protein CLPS1, chloroplastic-like [Rosa chinensis]	2.057	1.04071	3.86282e-05	0.000684485	yes	up
FxaC_4g20840	FxaC_4g20840	PREDICTED: calcium-transporting ATPase 2, plasma membrane-type-like [Fragaria vesca subsp. vesca]	2.599	1.37789	3.88743e-05	0.000687993	yes	up
FxaC_23g47450	FxaC_23g47450	PREDICTED: LOW QUALITY PROTEIN: uncharacterized protein LOC101295558 [Fragaria vesca subsp. vesca]	2.142	1.09914	3.89004e-05	0.000688243	yes	up
FxaC_6g40940	FxaC_6g40940	PREDICTED: monoglyceride lipase [Fragaria vesca subsp. vesca]	2.046	1.03288	3.89863e-05	0.00068955	yes	up
FxaC_11g47430	FxaC_11g47430	PREDICTED: probable LRR receptor-like serine/threonine-protein kinase At4g36180 [Fragaria vesca subsp. vesca]	67.096	6.06816	3.94011e-05	0.000695167	yes	up
FxaC_25g52620	FxaC_25g52620	PREDICTED: uncharacterized protein LOC100816885 [Glycine max]	3.468	1.79427	3.97079e-05	0.000700106	yes	up
FxaC_6g34900	FxaC_6g34900	PREDICTED: uncharacterized protein LOC101294330 [Fragaria vesca subsp. vesca]	0.388	-1.3667	3.9762e-05	0.000700521	yes	down
FxaC_6g15000	FxaC_6g15000	PREDICTED: phytosulfokine receptor 2 [Fragaria vesca subsp. vesca]	2.296	1.19927	3.97812e-05	0.000700569	yes	up
FxaC_21g13560	FxaC_21g13560	PREDICTED: B-box zinc finger protein 32-like [Fragaria vesca subsp. vesca]	2.539	1.34443	3.9793e-05	0.000700569	yes	up
FxaC_14g34460	FxaC_14g34460	PREDICTED: 4-coumarate--CoA ligase 2-like [Fragaria vesca subsp. vesca]	2.328	1.21901	3.98418e-05	0.000700998	yes	up
FxaC_20g31320	FxaC_20g31320	hypothetical protein CUMW_011520 [Citrus unshiu]	0.422	-1.24432	3.98846e-05	0.000701535	yes	down
FxaC_27g01630	FxaC_27g01630	PREDICTED: cycloartenol-C-24-methyltransferase [Fragaria vesca subsp. vesca]	0.431	-1.21434	4.04269e-05	0.00070933	yes	down
FxaC_17g13620	FxaC_17g13620	PREDICTED: pre-rRNA-processing protein TSR1 homolog [Fragaria vesca subsp. vesca]	2.007	1.00501	4.13923e-05	0.000723828	yes	up
FxaC_22g41800	FxaC_22g41800	PREDICTED: syntaxin-121-like [Fragaria vesca subsp. vesca]	5.022	2.32826	4.19867e-05	0.00073355	yes	up
FxaC_14g00560	FxaC_14g00560	PREDICTED: superoxide dismutase [Fe]	2.371	1.24562	4.20205e-05	0.000733788	yes	up
FxaC_7g35380	FxaC_7g35380	PREDICTED: uncharacterized protein LOC101311158 [Fragaria vesca subsp. vesca]	0.307	-1.70157	4.2026e-05	0.000733788	yes	down
FxaC_5g40590	FxaC_5g40590	PREDICTED: serine carboxypeptidase-like 7 [Fragaria vesca subsp. vesca]	0.131	-2.92933	4.21485e-05	0.000735108	yes	down
FxaC_26g35010	FxaC_26g35010	PREDICTED: sigma factor binding protein 1, chloroplastic-like [Fragaria vesca subsp. vesca]	3.262	1.70566	4.2153e-05	0.000735108	yes	up
FxaC_24g58030	FxaC_24g58030	PREDICTED: uncharacterized protein LOC101301604, partial [Fragaria vesca subsp. vesca]	2.442	1.28812	4.22717e-05	0.000736554	yes	up
FxaC_25g14440	FxaC_25g14440	PREDICTED: UPF0481 protein At3g47200-like [Fragaria vesca subsp. vesca]	76.244	6.25255	4.26712e-05	0.000742336	yes	up
FxaC_15g06800	FxaC_15g06800	PREDICTED: uncharacterized protein At5g01610 [Fragaria vesca subsp. vesca]	0.448	-1.15819	4.2811e-05	0.000744543	yes	down
FxaC_19g04400	FxaC_19g04400	PREDICTED: ABC transporter C family member 10-like [Fragaria vesca subsp. vesca]	0.477	-1.06845	4.28553e-05	0.00074486	yes	down
FxaC_21g64200	FxaC_21g64200	PREDICTED: GDSL esterase/lipase At1g54790-like [Fragaria vesca subsp. vesca]	65.377	6.03071	4.30467e-05	0.00074796	yes	up
FxaC_8g02710	FxaC_8g02710	PREDICTED: LOW QUALITY PROTEIN: flavonol synthase/flavanone 3-hydroxylase-like [Fragaria vesca subsp. vesca]	0.115	-3.12324	4.31681e-05	0.000749613	yes	down
FxaC_8g26890	FxaC_8g26890	PREDICTED: MATE efflux family protein 5 [Fragaria vesca subsp. vesca]	3.197	1.6765	4.34947e-05	0.000754599	yes	up
FxaC_5g05800	FxaC_5g05800	PREDICTED: uncharacterized protein LOC101313379 [Fragaria vesca subsp. vesca]	3.925	1.97286	4.36254e-05	0.000756637	yes	up
FxaC_19g02750	FxaC_19g02750	PREDICTED: BTB/POZ domain-containing protein At5g41330 [Fragaria vesca subsp. vesca]	2.611	1.38436	4.36978e-05	0.000757662	yes	up
[truncated: 1,414 more rows]

## Sheet: Table S4
Table S4. Differentially expressed genes under salt stress in 'Sweet Charlie'
Gene_id	Gene name	Gene description	FC(sc_n19/sc_ck19)	Log2FC(sc_n19/sc_ck19)	Pvalue	Padjust	Significant	Regulate
FxaC_2g17710	FxaC_2g17710	PREDICTED: uncharacterized protein LOC101304803 [Fragaria vesca subsp. vesca]	6.56121	2.71396	0	0	yes	up
FxaC_24g47980	FxaC_24g47980	PREDICTED: 36.4 kDa proline-rich protein [Fragaria vesca subsp. vesca]	3.47864	1.79852	0	0	yes	up
FxaC_12g15940	FxaC_12g15940	PREDICTED: glucomannan 4-beta-mannosyltransferase 2 [Fragaria vesca subsp. vesca]	4.09774	2.03483	0	0	yes	up
FxaC_12g48920	FxaC_12g48920	PREDICTED: 5'-adenylylsulfate reductase 1, chloroplastic-like [Fragaria vesca subsp. vesca]	6.21772	2.63638	0	0	yes	up
FxaC_12g48590	FxaC_12g48590	PREDICTED: tRNA wybutosine-synthesizing protein 2/3/4 [Fragaria vesca subsp. vesca]	2.95032	1.56087	0	0	yes	up
FxaC_24g48670	FxaC_24g48670	uncharacterized protein LOC110102142 [Dendrobium catenatum]	12.4319	3.63597	0	0	yes	up
FxaC_24g48680	FxaC_24g48680	7-deoxyloganetin glucosyltransferase, partial [Ananas comosus]	7.37616	2.88287	0	0	yes	up
FxaC_9g09760	FxaC_9g09760	PREDICTED: vacuolar cation/proton exchanger 3-like [Fragaria vesca subsp. vesca]	20.2844	4.3423	0	0	yes	up
FxaC_26g34040	FxaC_26g34040	PREDICTED: cytochrome P450 77A3-like [Fragaria vesca subsp. vesca]	6.50852	2.70233	0	0	yes	up
FxaC_10g33860	FxaC_10g33860	PREDICTED: glucomannan 4-beta-mannosyltransferase 2 [Fragaria vesca subsp. vesca]	3.62946	1.85975	0	0	yes	up
FxaC_1g15220	FxaC_1g15220	PREDICTED: uncharacterized protein LOC101304510 [Fragaria vesca subsp. vesca]	9.03142	3.17495	0	0	yes	up
FxaC_12g47560	FxaC_12g47560	anthocyanidin reductase [Fragaria x ananassa]	2.9105	1.54127	0	0	yes	up
FxaC_23g02430	FxaC_23g02430	PREDICTED: pectinesterase-like [Fragaria vesca subsp. vesca]	7.77321	2.95851	0	0	yes	up
FxaC_1g13370	FxaC_1g13370	PREDICTED: uncharacterized protein LOC101304803 [Fragaria vesca subsp. vesca]	5.08146	2.34524	0	0	yes	up
FxaC_26g30450	FxaC_26g30450	PREDICTED: protein ECERIFERUM 1-like [Fragaria vesca subsp. vesca]	19.6775	4.29848	0	0	yes	up
FxaC_15g02510	FxaC_15g02510	PREDICTED: MLP-like protein 423 [Fragaria vesca subsp. vesca]	14.573	3.86522	0	0	yes	up
FxaC_4g37550	FxaC_4g37550	PREDICTED: 36.4 kDa proline-rich protein [Fragaria vesca subsp. vesca]	6.06753	2.60111	0	0	yes	up
FxaC_3g15130	FxaC_3g15130	PREDICTED: uncharacterized protein LOC101304510 [Fragaria vesca subsp. vesca]	9.30117	3.21741	0	0	yes	up
FxaC_23g39610	FxaC_23g39610	PREDICTED: bifunctional 3-dehydroquinate dehydratase/shikimate dehydrogenase, chloroplastic-like [Fragaria vesca subsp. vesca]	7.67926	2.94097	0	0	yes	up
FxaC_24g44210	FxaC_24g44210	hypothetical protein PRUPE_3G031000 [Prunus persica]	2.78622	1.47831	0	0	yes	up
FxaC_3g08710	FxaC_3g08710	PREDICTED: auxin-binding protein ABP19a-like [Fragaria vesca subsp. vesca]	2.67828	1.42131	0	0	yes	up
FxaC_8g31830	FxaC_8g31830	PREDICTED: long chain acyl-CoA synthetase 2 [Fragaria vesca subsp. vesca]	4.9751	2.31473	0	0	yes	up
FxaC_15g13300	FxaC_15g13300	PREDICTED: cytochrome P450 71B34-like [Fragaria vesca subsp. vesca]	5.66106	2.50107	0	0	yes	up
FxaC_13g03160	FxaC_13g03160	PREDICTED: MLP-like protein 423 [Fragaria vesca subsp. vesca]	6.16105	2.62318	0	0	yes	up
FxaC_26g42540	FxaC_26g42540	PREDICTED: linoleate 13S-lipoxygenase 2-1, chloroplastic-like [Fragaria vesca subsp. vesca]	4.06754	2.02416	0	0	yes	up
FxaC_5g17250	FxaC_5g17250	PREDICTED: acanthoscurrin-2-like [Fragaria vesca subsp. vesca]	19.7227	4.30179	0	0	yes	up
FxaC_3g12540	FxaC_3g12540	PREDICTED: GDSL esterase/lipase EXL3-like [Fragaria vesca subsp. vesca]	22.3425	4.48172	0	0	yes	up
FxaC_2g19120	FxaC_2g19120	PREDICTED: uncharacterized protein LOC101304510 [Fragaria vesca subsp. vesca]	10.6419	3.41168	0	0	yes	up
FxaC_17g53140	FxaC_17g53140	PREDICTED: 7-deoxyloganetin glucosyltransferase-like [Fragaria vesca subsp. vesca]	34.1133	5.09226	0	0	yes	up
FxaC_5g16760	FxaC_5g16760	PREDICTED: glutathione transferase GST 23-like [Fragaria vesca subsp. vesca]	5.87549	2.55471	0	0	yes	up
FxaC_26g41630	FxaC_26g41630	PREDICTED: polyketide synthase 1 [Fragaria vesca subsp. vesca]	2.63218	1.39626	0	0	yes	up
FxaC_6g16580	FxaC_6g16580	extensin-3-like [Cucurbita pepo subsp. pepo]	2.70154	1.43378	0	0	yes	up
FxaC_28g29390	FxaC_28g29390	PREDICTED: protein ECERIFERUM 1-like [Fragaria vesca subsp. vesca]	28.7732	4.84666	0	0	yes	up
FxaC_1g23080	FxaC_1g23080	putative laccase-9 [Rosa chinensis]	7.10383	2.8286	0	0	yes	up
FxaC_3g12980	FxaC_3g12980	flavanone 3-hydroxylase [Fragaria x ananassa]	2.81895	1.49516	0	0	yes	up
FxaC_26g39270	FxaC_26g39270	PREDICTED: repetitive proline-rich cell wall protein 1-like [Fragaria vesca subsp. vesca]	4.43311	2.14832	0	0	yes	up
FxaC_9g44460	FxaC_9g44460	PREDICTED: LOW QUALITY PROTEIN: tyrosine decarboxylase 1-like [Fragaria vesca subsp. vesca]	5.84735	2.54778	0	0	yes	up
FxaC_3g13150	FxaC_3g13150	PREDICTED: uncharacterized protein LOC101304803 [Fragaria vesca subsp. vesca]	5.51557	2.46351	0	0	yes	up
FxaC_2g17980	FxaC_2g17980	PREDICTED: beta-galactosidase 3 [Fragaria vesca subsp. vesca]	6.7587	2.75675	0	0	yes	up
FxaC_10g50420	FxaC_10g50420	PREDICTED: probable polyamine transporter At3g13620 [Fragaria vesca subsp. vesca]	15.3405	3.93928	0	0	yes	up
FxaC_7g19450	FxaC_7g19450	PREDICTED: glutathione transferase GST 23-like [Fragaria vesca subsp. vesca]	4.98372	2.31722	0	0	yes	up
FxaC_16g13290	FxaC_16g13290	PREDICTED: protein ECERIFERUM 26-like [Fragaria vesca subsp. vesca]	3.22189	1.68791	0	0	yes	up
FxaC_13g40740	FxaC_13g40740	PREDICTED: ABC transporter C family member 3-like [Fragaria vesca subsp. vesca]	2.06647	1.04717	0	0	yes	up
FxaC_7g05930	FxaC_7g05930	PREDICTED: long chain acyl-CoA synthetase 2 isoform X3 [Phoenix dactylifera]	7.31215	2.8703	0	0	yes	up
FxaC_4g35820	FxaC_4g35820	PREDICTED: ABC transporter G family member 32 isoform X2 [Fragaria vesca subsp. vesca]	4.56737	2.19136	0	0	yes	up
FxaC_16g25520	FxaC_16g25520	expansin [Fragaria x ananassa]	4.71018	2.23578	0	0	yes	up
FxaC_3g33630	FxaC_3g33630	PREDICTED: long chain acyl-CoA synthetase 1-like [Fragaria vesca subsp. vesca]	4.01957	2.00704	0	0	yes	up
FxaC_10g05090	FxaC_10g05090	PREDICTED: L-ascorbate oxidase homolog [Fragaria vesca subsp. vesca]	13.7608	3.78249	0	0	yes	up
FxaC_10g05050	FxaC_10g05050	PREDICTED: 5'-adenylylsulfate reductase 1, chloroplastic-like [Fragaria vesca subsp. vesca]	6.44661	2.68854	0	0	yes	up
FxaC_8g10010	FxaC_8g10010	PREDICTED: dehydration-responsive protein RD22 [Fragaria vesca subsp. vesca]	2.63317	1.3968	0	0	yes	up
FxaC_10g04880	FxaC_10g04880	PREDICTED: tRNA wybutosine-synthesizing protein 2/3/4 [Fragaria vesca subsp. vesca]	4.18073	2.06376	0	0	yes	up
FxaC_22g60870	FxaC_22g60870	PREDICTED: uncharacterized protein LOC101303527 [Fragaria vesca subsp. vesca]	5.02177	2.3282	0	0	yes	up
FxaC_23g35760	FxaC_23g35760	PREDICTED: uncharacterized protein LOC101303527 [Fragaria vesca subsp. vesca]	2.39555	1.26036	0	0	yes	up
FxaC_8g11500	FxaC_8g11500	PREDICTED: patatin-like protein 2 [Fragaria vesca subsp. vesca]	0.436378	-1.19635	0	0	yes	down
FxaC_27g49880	FxaC_27g49880	PREDICTED: BAHD acyltransferase DCR [Fragaria vesca subsp. vesca]	20.0351	4.32446	0	0	yes	up
FxaC_23g33520	FxaC_23g33520	PREDICTED: non-specific lipid-transfer protein 3-like [Fragaria vesca subsp. vesca]	2.27941	1.18866	0	0	yes	up
FxaC_14g14490	FxaC_14g14490	PREDICTED: non-specific lipid transfer protein GPI-anchored 1 [Fragaria vesca subsp. vesca]	5.62263	2.49125	0	0	yes	up
FxaC_14g26200	FxaC_14g26200	PREDICTED: protein ECERIFERUM 26-like [Fragaria vesca subsp. vesca]	5.88611	2.55731	0	0	yes	up
FxaC_25g08810	FxaC_25g08810	PREDICTED: cytochrome P450 77A3-like [Fragaria vesca subsp. vesca]	4.04656	2.01669	0	0	yes	up
FxaC_7g12130	FxaC_7g12130	PREDICTED: carbonic anhydrase 2-like [Fragaria vesca subsp. vesca]	4.64571	2.2159	0	0	yes	up
FxaC_25g12870	FxaC_25g12870	PREDICTED: protein ECERIFERUM 1-like [Fragaria vesca subsp. vesca]	17.2319	4.10701	0	0	yes	up
FxaC_7g38230	FxaC_7g38230	PREDICTED: dehydration-responsive protein RD22 [Fragaria vesca subsp. vesca]	2.16302	1.11304	0	0	yes	up
FxaC_2g09340	FxaC_2g09340	hypothetical protein AQUCO_02000073v1 [Aquilegia coerulea]	5.45415	2.44735	0	0	yes	up
FxaC_4g26290	FxaC_4g26290	PREDICTED: uncharacterized protein LOC101304510 [Fragaria vesca subsp. vesca]	9.57347	3.25904	0	0	yes	up
FxaC_23g61600	FxaC_23g61600	PREDICTED: uncharacterized protein LOC101310720 [Fragaria vesca subsp. vesca]	0.491193	-1.02564	0	0	yes	down
FxaC_21g00810	FxaC_21g00810	PREDICTED: gibberellin-regulated protein 6-like [Fragaria vesca subsp. vesca]	9.86157	3.30182	0	0	yes	up
FxaC_22g72190	FxaC_22g72190	non-specific lipid transfer protein precursor [Fragaria x ananassa]	11.4249	3.51411	0	0	yes	up
FxaC_8g06300	FxaC_8g06300	dihydroflavonol 4-reductase [Fragaria x ananassa]	3.00791	1.58876	0	0	yes	up
FxaC_14g02780	FxaC_14g02780	PREDICTED: MLP-like protein 423 [Fragaria vesca subsp. vesca]	7.63363	2.93237	0	0	yes	up
FxaC_24g57280	FxaC_24g57280	PREDICTED: gibberellin-regulated protein 6-like [Fragaria vesca subsp. vesca]	8.96533	3.16436	0	0	yes	up
FxaC_4g31810	FxaC_4g31810	hypothetical protein GOBAR_AA33812 [Gossypium barbadense]	2.70723	1.43682	0	0	yes	up
FxaC_22g70970	FxaC_22g70970	PREDICTED: GDSL esterase/lipase At5g33370-like [Fragaria vesca subsp. vesca]	76.0293	6.24848	0	0	yes	up
FxaC_21g60600	FxaC_21g60600	uncharacterized protein LOC112195242 isoform X6 [Rosa chinensis]	3.64196	1.86472	0	0	yes	up
FxaC_2g11480	FxaC_2g11480	PREDICTED: 2-alkenal reductase (NADP(+)-dependent)-like isoform X3 [Fragaria vesca subsp. vesca]	6.60647	2.72388	0	0	yes	up
FxaC_14g06500	FxaC_14g06500	expansin [Fragaria x ananassa]	4.51092	2.17342	0	0	yes	up
FxaC_25g01510	FxaC_25g01510	PREDICTED: polyketide synthase 1 [Fragaria vesca subsp. vesca]	2.78771	1.47908	0	0	yes	up
FxaC_4g28470	FxaC_4g28470	PREDICTED: GDSL esterase/lipase EXL3-like [Fragaria vesca subsp. vesca]	32.2048	5.0092	0	0	yes	up
FxaC_6g04890	FxaC_6g04890	Recname: Full=Cinnamate beta-D-glucosyltransferase; Altname: Full=UDP-glucose:cinnamate glucosyltransferase; Short=FaGT2 >gi|51705411|gb|AAU09443.1| UDP-glucose glucosyltransferase [Fragaria x ananassa]	9.58982	3.2615	0	0	yes	up
FxaC_27g27800	FxaC_27g27800	PREDICTED: BAG family molecular chaperone regulator 6 isoform X1 [Fragaria vesca subsp. vesca]	2.1913	1.13179	0	0	yes	up
FxaC_4g27550	FxaC_4g27550	PREDICTED: uncharacterized protein LOC101304803 [Fragaria vesca subsp. vesca]	5.38986	2.43025	0	0	yes	up
FxaC_28g37450	FxaC_28g37450	PREDICTED: polyketide synthase 1 [Fragaria vesca subsp. vesca]	3.46407	1.79247	0	0	yes	up
FxaC_1g04090	FxaC_1g04090	PREDICTED: 36.4 kDa proline-rich protein [Fragaria vesca subsp. vesca]	2.34589	1.23014	0	0	yes	up
FxaC_26g22290	FxaC_26g22290	PREDICTED: BAG family molecular chaperone regulator 6 isoform X1 [Fragaria vesca subsp. vesca]	4.46845	2.15978	0	0	yes	up
FxaC_22g69030	FxaC_22g69030	PREDICTED: bifunctional 3-dehydroquinate dehydratase/shikimate dehydrogenase, chloroplastic-like [Fragaria vesca subsp. vesca]	9.4237	3.23629	0	0	yes	up
FxaC_25g00650	FxaC_25g00650	PREDICTED: linoleate 13S-lipoxygenase 2-1, chloroplastic-like [Fragaria vesca subsp. vesca]	2.42114	1.27569	0	0	yes	up
FxaC_13g30910	FxaC_13g30910	PREDICTED: protein ECERIFERUM 26-like [Fragaria vesca subsp. vesca]	8.86717	3.14847	0	0	yes	up
FxaC_10g04090	FxaC_10g04090	anthocyanidin reductase [Fragaria x ananassa]	2.64406	1.40275	0	0	yes	up
FxaC_10g43120	FxaC_10g43120	PREDICTED: vacuolar cation/proton exchanger 3-like [Fragaria vesca subsp. vesca]	26.5763	4.73207	0	0	yes	up
FxaC_13g24140	FxaC_13g24140	phytepsin-like isoform X2 [Prunus avium]	9.5124	3.24981	0	0	yes	up
FxaC_24g16290	FxaC_24g16290	PREDICTED: glycerol-3-phosphate 2-O-acyltransferase 6 [Fragaria vesca subsp. vesca]	6.39231	2.67634	0	0	yes	up
FxaC_24g07620	FxaC_24g07620	PREDICTED: GDP-mannose 3,5-epimerase 2 [Fragaria vesca subsp. vesca]	3.65767	1.87093	0	0	yes	up
FxaC_15g17710	FxaC_15g17710		2.35813	1.23764	0	0	yes	up
FxaC_22g15770	FxaC_22g15770	PREDICTED: 36.4 kDa proline-rich protein [Fragaria vesca subsp. vesca]	4.01783	2.00642	0	0	yes	up
FxaC_2g27650	FxaC_2g27650	phospho-2-dehydro-3-deoxyheptonate aldolase [Fragaria x ananassa]	3.96346	1.98676	0	0	yes	up
FxaC_5g41990	FxaC_5g41990	PREDICTED: proline-rich protein 4-like isoform X1 [Fragaria vesca subsp. vesca]	3.26713	1.70802	0	0	yes	up
FxaC_15g20110	FxaC_15g20110	CASP-like protein 1E1 [Rosa chinensis]	2.73136	1.44962	0	0	yes	up
FxaC_6g07780	FxaC_6g07780	PREDICTED: long chain acyl-CoA synthetase 2 [Fragaria vesca subsp. vesca]	7.38549	2.88469	0	0	yes	up
FxaC_12g01010	FxaC_12g01010	PREDICTED: probable polyamine transporter At3g13620 [Fragaria vesca subsp. vesca]	14.1395	3.82166	0	0	yes	up
FxaC_24g13800	FxaC_24g13800	PREDICTED: non-specific lipid-transfer protein 1-like [Fragaria vesca subsp. vesca]	23.7852	4.57199	0	0	yes	up
FxaC_25g51840	FxaC_25g51840	PREDICTED: BAHD acyltransferase DCR [Fragaria vesca subsp. vesca]	5.12866	2.35858	0	0	yes	up
FxaC_18g02530	FxaC_18g02530	PREDICTED: acetyl-CoA carboxylase 1-like isoform X1 [Fragaria vesca subsp. vesca]	2.78654	1.47847	0	0	yes	up
FxaC_6g43300	FxaC_6g43300	PREDICTED: endoglucanase 10-like [Fragaria vesca subsp. vesca]	3.72146	1.89587	0	0	yes	up
FxaC_3g02770	FxaC_3g02770	proline-rich protein precursor [Solanum lycopersicum]	23.0086	4.5241	0	0	yes	up
FxaC_13g24530	FxaC_13g24530	PREDICTED: ABC transporter B family member 11-like [Fragaria vesca subsp. vesca]	24.0681	4.58905	0	0	yes	up
FxaC_23g42540	FxaC_23g42540	uncharacterized protein LOC110668128 [Hevea brasiliensis]	95.9238	6.58382	0	0	yes	up
FxaC_8g37210	FxaC_8g37210	PREDICTED: UDP-glycosyltransferase 74E1-like [Fragaria vesca subsp. vesca]	7.72122	2.94883	0	0	yes	up
FxaC_19g04600	FxaC_19g04600	cyclic nucleotide-gated ion channel 1-like [Rosa chinensis]	0.374683	-1.41626	0	0	yes	down
FxaC_17g54370	FxaC_17g54370	PREDICTED: acetyl-CoA carboxylase 1-like isoform X1 [Fragaria vesca subsp. vesca]	2.63133	1.39579	0	0	yes	up
FxaC_21g67460	FxaC_21g67460	PREDICTED: GDP-mannose 3,5-epimerase 2 [Fragaria vesca subsp. vesca]	4.06505	2.02327	0	0	yes	up
FxaC_13g07530	FxaC_13g07530	PREDICTED: expansin-A1 [Fragaria vesca subsp. vesca]	7.24347	2.85668	0	0	yes	up
FxaC_25g53840	FxaC_25g53840	PREDICTED: cyclic nucleotide-gated ion channel 1-like [Fragaria vesca subsp. vesca]	0.487478	-1.03659	0	0	yes	down
FxaC_21g70990	FxaC_21g70990	PREDICTED: GDSL esterase/lipase At5g33370-like [Fragaria vesca subsp. vesca]	98.3875	6.6204	0	0	yes	up
FxaC_7g00990	FxaC_7g00990	PREDICTED: proline-rich protein 4-like [Juglans regia]	2.9417	1.55665	0	0	yes	up
FxaC_6g01170	FxaC_6g01170	PREDICTED: proline-rich protein 4-like isoform X3 [Fragaria vesca subsp. vesca]	3.67379	1.87727	0	0	yes	up
FxaC_24g06350	FxaC_24g06350	PREDICTED: GDSL esterase/lipase At5g33370-like [Fragaria vesca subsp. vesca]	614.124	9.26239	0	0	yes	up
FxaC_8g38340	FxaC_8g38340	PREDICTED: proline-rich protein 4-like isoform X2 [Fragaria vesca subsp. vesca]	3.61239	1.85295	0	0	yes	up
FxaC_27g11010	FxaC_27g11010	PREDICTED: protein ECERIFERUM 1-like [Fragaria vesca subsp. vesca]	150.813	7.23662	0	0	yes	up
FxaC_26g02060	FxaC_26g02060	PREDICTED: cytochrome P450 704C1-like [Fragaria vesca subsp. vesca]	47.1228	5.55835	0	0	yes	up
FxaC_28g04380	FxaC_28g04380	PREDICTED: BAHD acyltransferase DCR [Fragaria vesca subsp. vesca]	11.2214	3.48818	0	0	yes	up
FxaC_6g05470	FxaC_6g05470	PREDICTED: uncharacterized protein At4g06744 [Fragaria vesca subsp. vesca]	2.37831	1.24993	0	0	yes	up
FxaC_20g29990	FxaC_20g29990		2.77785	1.47397	0	0	yes	up
FxaC_5g24870	FxaC_5g24870	PREDICTED: extensin-3-like [Fragaria vesca subsp. vesca]	3.6296	1.85981	0	0	yes	up
FxaC_23g41100	FxaC_23g41100	PREDICTED: GDP-mannose 3,5-epimerase 2 [Fragaria vesca subsp. vesca]	3.93491	1.97633	0	0	yes	up
FxaC_27g01350	FxaC_27g01350	PREDICTED: polyketide synthase 1 [Fragaria vesca subsp. vesca]	2.89225	1.53219	0	0	yes	up
FxaC_9g01410	FxaC_9g01410	PREDICTED: probable polyamine transporter At3g13620 [Fragaria vesca subsp. vesca]	13.2396	3.72679	0	0	yes	up
FxaC_5g34910	FxaC_5g34910	TMV resistance protein N-like isoform X1 [Rosa chinensis]	7.33998	2.87578	0	0	yes	up
FxaC_20g02800	FxaC_20g02800	PREDICTED: cytochrome P450 86A7 [Fragaria vesca subsp. vesca]	4.92295	2.29952	0	0	yes	up
FxaC_5g24940	FxaC_5g24940	PREDICTED: carbonic anhydrase 2-like [Fragaria vesca subsp. vesca]	5.89541	2.55959	0	0	yes	up
FxaC_28g06160	FxaC_28g06160	LOW QUALITY PROTEIN: uncharacterized protein LOC112167556 [Rosa chinensis]	293.006	8.19479	0	0	yes	up
FxaC_27g02820	FxaC_27g02820	PREDICTED: repetitive proline-rich cell wall protein 1-like [Fragaria vesca subsp. vesca]	13.9838	3.80569	0	0	yes	up
FxaC_6g02490	FxaC_6g02490	PREDICTED: UDP-glycosyltransferase 74E1-like [Fragaria vesca subsp. vesca]	15.0289	3.90966	0	0	yes	up
FxaC_25g14100	FxaC_25g14100	PREDICTED: protein ECERIFERUM 1-like [Fragaria vesca subsp. vesca]	16.2766	4.02473	1.1267e-305	4.39799e-303	yes	up
FxaC_1g23980	FxaC_1g23980	phospho-2-dehydro-3-deoxyheptonate aldolase [Fragaria x ananassa]	3.46489	1.79281	3.30245e-305	1.28212e-302	yes	up
FxaC_17g22250	FxaC_17g22250	PREDICTED: beta-glucosidase 44-like [Fragaria vesca subsp. vesca]	8.21379	3.03805	3.59756e-304	1.38918e-301	yes	up
FxaC_22g20600	FxaC_22g20600	PREDICTED: subtilisin-like protease [Fragaria vesca subsp. vesca]	3.1841	1.67088	1.37157e-302	5.23991e-300	yes	up
FxaC_16g21760	FxaC_16g21760	PREDICTED: 3-ketoacyl-CoA synthase 6 [Fragaria vesca subsp. vesca]	2.43775	1.28555	3.07228e-302	1.16751e-299	yes	up
FxaC_7g38450	FxaC_7g38450	PREDICTED: putative glutathione-specific gamma-glutamylcyclotransferase 2 [Fragaria vesca subsp. vesca]	7.64721	2.93493	8.45049e-301	3.19442e-298	yes	up
FxaC_5g09590	FxaC_5g09590	PREDICTED: sucrose synthase 2 [Fragaria vesca subsp. vesca]	3.44514	1.78456	1.26817e-296	4.69504e-294	yes	up
FxaC_18g39760	FxaC_18g39760	glucan endo-1,3-beta-glucosidase, basic isoform-like [Rosa chinensis]	4.63743	2.21333	1.3233e-295	4.87402e-293	yes	up
FxaC_18g28240	FxaC_18g28240	PREDICTED: beta-glucosidase 44-like [Fragaria vesca subsp. vesca]	7.77009	2.95793	1.67277e-295	6.12978e-293	yes	up
FxaC_18g43650	FxaC_18g43650	PREDICTED: cytochrome P450 86A7 [Fragaria vesca subsp. vesca]	5.6656	2.50223	1.33121e-294	4.85336e-292	yes	up
FxaC_20g08130	FxaC_20g08130	PREDICTED: uncharacterized protein LOC105351804 [Fragaria vesca subsp. vesca]	6.37524	2.67248	1.46124e-294	5.30055e-292	yes	up
FxaC_3g13680	FxaC_3g13680	PREDICTED: beta-galactosidase 3 [Fragaria vesca subsp. vesca]	11.9012	3.57303	2.64753e-291	9.50766e-289	yes	up
FxaC_11g40230	FxaC_11g40230	PREDICTED: vacuolar cation/proton exchanger 3-like [Fragaria vesca subsp. vesca]	19.2068	4.26354	8.26858e-290	2.9546e-287	yes	up
FxaC_17g16940	FxaC_17g16940	PREDICTED: protein ASPARTIC PROTEASE IN GUARD CELL 1 [Fragaria vesca subsp. vesca]	4.19489	2.06863	4.78547e-288	1.67662e-285	yes	up
FxaC_3g23350	FxaC_3g23350	phospho-2-dehydro-3-deoxyheptonate aldolase [Fragaria x ananassa]	3.79927	1.92572	1.99352e-287	6.95052e-285	yes	up
FxaC_9g26360	FxaC_9g26360	PREDICTED: uncharacterized protein LOC101302722 [Fragaria vesca subsp. vesca]	921.396	9.84768	7.37861e-286	2.56016e-283	yes	up
FxaC_21g15230	FxaC_21g15230	unnamed protein product, partial [Vitis vinifera]	3.25165	1.70117	9.03876e-285	3.12111e-282	yes	up
FxaC_4g27820	FxaC_4g27820	flavanone 3-hydroxylase [Fragaria x ananassa]	2.93808	1.55487	2.90416e-283	9.93266e-281	yes	up
FxaC_17g05660	FxaC_17g05660	endo-beta-1,4-glucanase [Fragaria x ananassa]	4.52785	2.17882	3.13412e-283	1.06683e-280	yes	up
FxaC_23g25910	FxaC_23g25910	phenylalanine ammonia-lyase 2 [Fragaria x ananassa]	2.38106	1.2516	3.67811e-281	1.23445e-278	yes	up
FxaC_13g54330	FxaC_13g54330	PREDICTED: ATP sulfurylase 1, chloroplastic [Fragaria vesca subsp. vesca]	2.11712	1.0821	3.71e-281	1.23936e-278	yes	up
FxaC_20g14690	FxaC_20g14690	flavonoid 3'-hydroxylase [Fragaria x ananassa]	2.46983	1.30441	8.94248e-279	2.94622e-276	yes	up
FxaC_13g10950	FxaC_13g10950	PREDICTED: leucoanthocyanidin reductase-like [Fragaria vesca subsp. vesca]	2.10008	1.07044	2.4279e-275	7.89044e-273	yes	up
FxaC_14g10060	FxaC_14g10060	PREDICTED: 3-ketoacyl-CoA synthase 6 [Fragaria vesca subsp. vesca]	3.46539	1.79302	5.51809e-275	1.78525e-272	yes	up
FxaC_13g03530	FxaC_13g03530	PREDICTED: polygalacturonase At1g48100 [Fragaria vesca subsp. vesca]	4.87359	2.28498	3.83171e-271	1.22313e-268	yes	up
FxaC_15g24530	FxaC_15g24530	PREDICTED: protein ECERIFERUM 26-like [Fragaria vesca subsp. vesca]	3.97308	1.99026	1.89453e-267	5.99432e-265	yes	up
FxaC_13g22860	FxaC_13g22860	PREDICTED: pyruvate dehydrogenase E1 component subunit beta-1, mitochondrial [Fragaria vesca subsp. vesca]	5.47415	2.45264	5.79696e-267	1.82612e-264	yes	up
FxaC_15g40320	FxaC_15g40320	PREDICTED: protein tesmin/TSO1-like CXC 2 [Fragaria vesca subsp. vesca]	5.26495	2.39642	8.84886e-267	2.77534e-264	yes	up
FxaC_5g09810	FxaC_5g09810	PREDICTED: blue-light photoreceptor PHR2 [Fragaria vesca subsp. vesca]	2.06917	1.04905	1.38608e-266	4.32836e-264	yes	up
FxaC_23g38290	FxaC_23g38290	PREDICTED: bifunctional 3-dehydroquinate dehydratase/shikimate dehydrogenase, chloroplastic-like [Fragaria vesca subsp. vesca]	5.1433	2.36269	4.99489e-266	1.55302e-263	yes	up
FxaC_24g28480	FxaC_24g28480	PREDICTED: omega-6 fatty acid desaturase, endoplasmic reticulum isozyme 2-like [Fragaria vesca subsp. vesca]	4.38283	2.13186	1.90591e-265	5.90035e-263	yes	up
FxaC_16g18000	FxaC_16g18000	hypothetical protein CDL15_Pgr024516 [Punica granatum]	3.69941	1.8873	9.14145e-265	2.7939e-262	yes	up
FxaC_1g13770	FxaC_1g13770	PREDICTED: beta-galactosidase 3 [Fragaria vesca subsp. vesca]	7.16546	2.84106	2.6844e-263	8.16957e-261	yes	up
FxaC_16g01520	FxaC_16g01520	PREDICTED: ATP sulfurylase 1, chloroplastic [Fragaria vesca subsp. vesca]	2.09349	1.06591	2.84677e-261	8.62715e-259	yes	up
FxaC_26g00550	FxaC_26g00550	PREDICTED: BAHD acyltransferase DCR [Fragaria vesca subsp. vesca]	3.29679	1.72106	2.27398e-259	6.86235e-257	yes	up
FxaC_11g17250	FxaC_11g17250	PREDICTED: phosphoenolpyruvate carboxylase 2 [Fragaria vesca subsp. vesca]	3.154	1.65718	4.59833e-258	1.38187e-255	yes	up
FxaC_24g11650	FxaC_24g11650	PREDICTED: uncharacterized protein LOC101303527 [Fragaria vesca subsp. vesca]	2.89316	1.53265	2.82278e-257	8.44752e-255	yes	up
FxaC_21g49400	FxaC_21g49400	PREDICTED: phenylalanine ammonia-lyase 1 [Fragaria vesca subsp. vesca]	2.3739	1.24726	5.52895e-257	1.64774e-254	yes	up
FxaC_16g06200	FxaC_16g06200	PREDICTED: serine carboxypeptidase-like 13 [Fragaria vesca subsp. vesca]	5.85946	2.55077	2.3932e-256	7.07352e-254	yes	up
FxaC_1g02300	FxaC_1g02300	PREDICTED: ABC transporter G family member 32 isoform X2 [Fragaria vesca subsp. vesca]	3.72637	1.89777	8.47495e-256	2.49466e-253	yes	up
FxaC_7g40960	FxaC_7g40960	PREDICTED: endoglucanase 10-like [Fragaria vesca subsp. vesca]	4.60939	2.20457	5.53292e-253	1.622e-250	yes	up
FxaC_1g13100	FxaC_1g13100	flavanone 3-hydroxylase [Fragaria x ananassa]	2.82801	1.49979	2.2587e-251	6.56787e-249	yes	up
FxaC_5g38120	FxaC_5g38120	Recname: Full=Cinnamate beta-D-glucosyltransferase; Altname: Full=UDP-glucose:cinnamate glucosyltransferase; Short=FaGT2 >gi|51705411|gb|AAU09443.1| UDP-glucose glucosyltransferase [Fragaria x ananassa]	11.0157	3.46149	4.67746e-250	1.34919e-247	yes	up
FxaC_19g12490	FxaC_19g12490	PREDICTED: protein ASPARTIC PROTEASE IN GUARD CELL 1 [Fragaria vesca subsp. vesca]	3.21682	1.68563	6.15575e-249	1.7685e-246	yes	up
FxaC_11g30960	FxaC_11g30960	PREDICTED: glucomannan 4-beta-mannosyltransferase 2 [Fragaria vesca subsp. vesca]	3.68913	1.88328	9.61664e-248	2.74086e-245	yes	up
FxaC_25g45800	FxaC_25g45800	PREDICTED: probable chalcone--flavonone isomerase 3 [Fragaria vesca subsp. vesca]	2.42637	1.2788	2.62764e-246	7.4595e-244	yes	up
FxaC_21g66110	FxaC_21g66110	PREDICTED: bifunctional 3-dehydroquinate dehydratase/shikimate dehydrogenase, chloroplastic-like [Fragaria vesca subsp. vesca]	7.11781	2.83143	2.21688e-245	6.24405e-243	yes	up
FxaC_21g45060	FxaC_21g45060	PREDICTED: 1-aminocyclopropane-1-carboxylate oxidase homolog 4-like [Fragaria vesca subsp. vesca]	2.13861	1.09667	5.33739e-245	1.49745e-242	yes	up
FxaC_9g19510	FxaC_9g19510	PREDICTED: glucomannan 4-beta-mannosyltransferase 2 [Fragaria vesca subsp. vesca]	5.1266	2.358	2.19554e-242	6.11203e-240	yes	up
FxaC_19g07740	FxaC_19g07740	PREDICTED: GDSL esterase/lipase At3g48460 [Fragaria vesca subsp. vesca]	13.291	3.73238	1.23752e-236	3.37955e-234	yes	up
FxaC_7g06920	FxaC_7g06920	PREDICTED: transcription factor RADIALIS-like [Fragaria vesca subsp. vesca]	0.339483	-1.55859	1.67479e-234	4.52212e-232	yes	down
FxaC_12g43490	FxaC_12g43490	PREDICTED: GDSL esterase/lipase At1g29670-like [Fragaria vesca subsp. vesca]	8.73472	3.12676	1.18587e-233	3.18998e-231	yes	up
FxaC_6g44880	FxaC_6g44880	dihydroflavonol 4-reductase [Fragaria x ananassa]	3.10727	1.63565	2.10696e-232	5.64657e-230	yes	up
FxaC_13g35900	FxaC_13g35900	CASP-like protein 1E1 [Rosa chinensis]	6.58346	2.71885	1.27373e-231	3.40087e-229	yes	up
FxaC_14g12890	FxaC_14g12890	unnamed protein product, partial [Vitis vinifera]	89.0022	6.47577	6.29525e-231	1.66843e-228	yes	up
FxaC_12g08050	FxaC_12g08050	PREDICTED: vacuolar cation/proton exchanger 3-like [Fragaria vesca subsp. vesca]	15.5374	3.95767	3.08575e-228	8.0886e-226	yes	up
FxaC_14g38150	FxaC_14g38150	PREDICTED: probable pectate lyase 8 [Fragaria vesca subsp. vesca]	5.09697	2.34964	3.33351e-227	8.64343e-225	yes	up
FxaC_17g15270	FxaC_17g15270	PREDICTED: uncharacterized protein LOC101303763 [Fragaria vesca subsp. vesca]	5.47781	2.4536	1.62213e-226	4.19088e-224	yes	up
FxaC_18g06140	FxaC_18g06140		6.75463	2.75588	2.44112e-226	6.28417e-224	yes	up
FxaC_25g43770	FxaC_25g43770	PREDICTED: chlorophyll a-b binding protein CP29.3, chloroplastic isoform X1 [Fragaria vesca subsp. vesca]	0.38023	-1.39505	1.26202e-225	3.23722e-223	yes	down
FxaC_18g43160	FxaC_18g43160	PREDICTED: uncharacterized protein LOC105351804 [Fragaria vesca subsp. vesca]	12.8073	3.6789	4.22777e-225	1.07297e-222	yes	up
FxaC_22g67740	FxaC_22g67740	PREDICTED: GDP-mannose 3,5-epimerase 2 [Fragaria vesca subsp. vesca]	3.36389	1.75013	1.20495e-224	3.0473e-222	yes	up
FxaC_19g15710	FxaC_19g15710	PREDICTED: uncharacterized protein LOC101292421 [Fragaria vesca subsp. vesca]	2.23798	1.1622	8.44342e-223	2.113e-220	yes	up
FxaC_7g40690	FxaC_7g40690	PREDICTED: tubulin beta chain-like [Fragaria vesca subsp. vesca]	3.38732	1.76014	4.71693e-222	1.17633e-219	yes	up
FxaC_7g28200	FxaC_7g28200	PREDICTED: uncharacterized protein LOC101304340 [Fragaria vesca subsp. vesca]	4.71855	2.23834	6.65333e-222	1.6535e-219	yes	up
FxaC_27g44580	FxaC_27g44580	PREDICTED: cytochrome P450 704C1-like isoform X2 [Fragaria vesca subsp. vesca]	101.926	6.67137	1.03516e-221	2.55492e-219	yes	up
FxaC_13g11650	FxaC_13g11650	PREDICTED: 3-ketoacyl-CoA synthase 6 [Fragaria vesca subsp. vesca]	2.51997	1.33341	6.95194e-221	1.69257e-218	yes	up
FxaC_5g09020	FxaC_5g09020	PREDICTED: protein TRANSPARENT TESTA 12-like [Fragaria vesca subsp. vesca]	4.18832	2.06637	1.36636e-220	3.3154e-218	yes	up
FxaC_22g66610	FxaC_22g66610	PREDICTED: GDP-mannose 3,5-epimerase 2 [Fragaria vesca subsp. vesca]	4.83883	2.27466	3.14784e-220	7.58683e-218	yes	up
FxaC_7g25900	FxaC_7g25900	PREDICTED: blue-light photoreceptor PHR2 [Fragaria vesca subsp. vesca]	2.04234	1.03022	2.48312e-218	5.94483e-216	yes	up
FxaC_16g00920	FxaC_16g00920	PREDICTED: protein NETWORKED 1A [Fragaria vesca subsp. vesca]	3.27945	1.71345	1.10559e-217	2.62937e-215	yes	up
FxaC_15g38170	FxaC_15g38170	hypothetical protein CUMW_143220 [Citrus unshiu]	3.34092	1.74025	1.67068e-216	3.94714e-214	yes	up
FxaC_4g17000	FxaC_4g17000	PREDICTED: phospho-2-dehydro-3-deoxyheptonate aldolase 2, chloroplastic-like [Fragaria vesca subsp. vesca]	4.57696	2.19439	4.16768e-216	9.81428e-214	yes	up
FxaC_9g43650	FxaC_9g43650	PREDICTED: putative wall-associated receptor kinase-like 16 [Fragaria vesca subsp. vesca]	0.487153	-1.03755	1.00159e-215	2.35089e-213	yes	down
FxaC_9g45680	FxaC_9g45680	PREDICTED: protein E6 [Fragaria vesca subsp. vesca]	4.41169	2.14133	4.11486e-215	9.5955e-213	yes	up
FxaC_25g23050	FxaC_25g23050	transcriptional activator Myb [Fragaria vesca]	5.13545	2.36049	3.10695e-214	7.22169e-212	yes	up
FxaC_15g34310	FxaC_15g34310	PREDICTED: alternative oxidase 3, mitochondrial-like [Fragaria vesca subsp. vesca]	5.03802	2.33286	1.64472e-213	3.79834e-211	yes	up
FxaC_13g55190	FxaC_13g55190	PREDICTED: protein tesmin/TSO1-like CXC 2 [Fragaria vesca subsp. vesca]	6.3638	2.66989	3.12046e-213	7.18336e-211	yes	up
FxaC_13g55160	FxaC_13g55160		2.7608	1.46509	3.59461e-213	8.24843e-211	yes	up
FxaC_23g48630	FxaC_23g48630	hypothetical protein glysoja_019304 [Glycine soja]	7.81594	2.96642	1.10472e-212	2.51888e-210	yes	up
FxaC_24g48800	FxaC_24g48800	PREDICTED: putative laccase-9 [Fragaria vesca subsp. vesca]	9.90527	3.3082	4.35219e-211	9.82979e-209	yes	up
FxaC_21g36850	FxaC_21g36850	glucan endo-1,3-beta-glucosidase, basic isoform-like [Rosa chinensis]	3.22166	1.6878	1.98732e-210	4.47445e-208	yes	up
FxaC_13g07970	FxaC_13g07970	PREDICTED: probable protein S-acyltransferase 22 [Fragaria vesca subsp. vesca]	4.19188	2.0676	1.14931e-209	2.5796e-207	yes	up
FxaC_3g02220	FxaC_3g02220	PREDICTED: uncharacterized protein LOC101297283 [Fragaria vesca subsp. vesca]	4.31916	2.11075	1.54779e-206	3.44169e-204	yes	up
FxaC_17g18710	FxaC_17g18710	flavonoid 3'-hydroxylase [Fragaria virginiana]	2.22522	1.15395	5.73449e-206	1.2712e-203	yes	up
FxaC_27g46550	FxaC_27g46550	PREDICTED: BAHD acyltransferase DCR [Fragaria vesca subsp. vesca]	19.3643	4.27533	1.6325e-204	3.57473e-202	yes	up
FxaC_9g43630	FxaC_9g43630	wall-associated receptor kinase-like 1 [Rosa chinensis]	0.441388	-1.17988	2.09881e-204	4.58185e-202	yes	down
FxaC_15g09560	FxaC_15g09560	leucoanthocyanidin reductase [Fragaria x ananassa]	2.63206	1.39619	2.60891e-204	5.67817e-202	yes	up
FxaC_2g26750	FxaC_2g26750	putative laccase-9 [Rosa chinensis]	8.35311	3.06231	3.37562e-204	7.32468e-202	yes	up
FxaC_25g58010	FxaC_25g58010	PREDICTED: non-specific lipid-transfer protein 3-like [Fragaria vesca subsp. vesca]	105.293	6.71826	5.21014e-203	1.12713e-200	yes	up
FxaC_8g37080	FxaC_8g37080	PREDICTED: serine carboxypeptidase-like 7 [Fragaria vesca subsp. vesca]	5.23203	2.38737	7.17447e-201	1.52906e-198	yes	up
FxaC_1g33400	FxaC_1g33400	PREDICTED: long chain acyl-CoA synthetase 1-like [Fragaria vesca subsp. vesca]	3.37392	1.75442	1.32515e-200	2.81588e-198	yes	up
FxaC_5g06190	FxaC_5g06190	PREDICTED: 14 kDa proline-rich protein DC2.15-like [Fragaria vesca subsp. vesca]	2.55287	1.35212	2.76458e-200	5.85723e-198	yes	up
FxaC_25g41730	FxaC_25g41730	PREDICTED: mannose-1-phosphate guanylyltransferase 1 [Fragaria vesca subsp. vesca]	2.63779	1.39933	1.07304e-199	2.2601e-197	yes	up
FxaC_23g08460	FxaC_23g08460	PREDICTED: root phototropism protein 3-like [Fragaria vesca subsp. vesca]	5.35466	2.4208	2.62604e-198	5.49884e-196	yes	up
FxaC_28g32270	FxaC_28g32270	PREDICTED: cytochrome P450 77A3-like [Fragaria vesca subsp. vesca]	4.84212	2.27564	3.94874e-197	8.19683e-195	yes	up
FxaC_22g48390	FxaC_22g48390	PREDICTED: aquaporin TIP1-1-like [Fragaria vesca subsp. vesca]	2.21151	1.14503	1.05079e-195	2.16871e-193	yes	up
FxaC_19g24940	FxaC_19g24940	photosystem I P700 apoprotein A2 [Fragaria vesca subsp. vesca]	0.486998	-1.03801	3.24544e-194	6.64095e-192	yes	down
FxaC_11g42640	FxaC_11g42640	PREDICTED: trans-cinnamate 4-monooxygenase [Fragaria vesca subsp. vesca]	2.12988	1.09077	8.09676e-194	1.6474e-191	yes	up
FxaC_22g06090	FxaC_22g06090	PREDICTED: gibberellin-regulated protein 6-like [Fragaria vesca subsp. vesca]	9.63616	3.26846	1.06347e-193	2.1516e-191	yes	up
FxaC_7g37920	FxaC_7g37920	PREDICTED: uncharacterized protein LOC101306980 [Fragaria vesca subsp. vesca]	2.77195	1.4709	1.6651e-191	3.34993e-189	yes	up
FxaC_20g40380	FxaC_20g40380	PREDICTED: acetyl-CoA carboxylase 1-like isoform X2 [Fragaria vesca subsp. vesca]	2.08151	1.05763	2.63836e-191	5.27841e-189	yes	up
FxaC_23g28590	FxaC_23g28590	PREDICTED: probable mediator of RNA polymerase II transcription subunit 37e [Fragaria vesca subsp. vesca]	2.20555	1.14114	3.955e-191	7.8687e-189	yes	up
FxaC_10g28640	FxaC_10g28640	PREDICTED: uncharacterized protein LOC101302722 [Fragaria vesca subsp. vesca]	1296.41	10.3403	1.63145e-189	3.21912e-187	yes	up
FxaC_24g30990	FxaC_24g30990	glucan endo-1,3-beta-glucosidase-like [Rosa chinensis]	12.7408	3.67139	2.3233e-189	4.57168e-187	yes	up
FxaC_25g34530	FxaC_25g34530	transcriptional activator Myb [Fragaria vesca]	2.80961	1.49037	1.31685e-188	2.56314e-186	yes	up
FxaC_3g14370	FxaC_3g14370	PREDICTED: ankyrin repeat-containing protein At5g02620-like [Fragaria vesca subsp. vesca]	0.33612	-1.57295	1.36228e-188	2.64441e-186	yes	down
FxaC_26g05110	FxaC_26g05110	PREDICTED: probable pectinesterase/pectinesterase inhibitor 34 [Fragaria vesca subsp. vesca]	3.95756	1.98461	3.22794e-188	6.24907e-186	yes	up
FxaC_20g13020	FxaC_20g13020	PREDICTED: protein ASPARTIC PROTEASE IN GUARD CELL 1 [Fragaria vesca subsp. vesca]	3.64275	1.86503	3.82609e-187	7.36733e-185	yes	up
FxaC_7g03640	FxaC_7g03640	PREDICTED: uncharacterized protein At4g06744 [Fragaria vesca subsp. vesca]	2.58016	1.36746	6.31212e-187	1.21218e-184	yes	up
FxaC_26g08190	FxaC_26g08190	p450 domain-containing protein, partial [Cephalotus follicularis]	293.14	8.19544	5.2078e-185	9.94787e-183	yes	up
FxaC_14g18510	FxaC_14g18510	PREDICTED: GDSL esterase/lipase At4g16230-like [Fragaria vesca subsp. vesca]	12.2073	3.60968	3.17987e-184	6.04201e-182	yes	up
FxaC_23g02590	FxaC_23g02590	PREDICTED: subtilisin-like protease [Fragaria vesca subsp. vesca]	2.10184	1.07165	4.01831e-183	7.55516e-181	yes	up
FxaC_13g11580	FxaC_13g11580	PREDICTED: alpha-xylosidase 1 [Fragaria vesca subsp. vesca]	4.145	2.05137	1.84316e-182	3.43847e-180	yes	up
FxaC_19g10910	FxaC_19g10910	PREDICTED: uncharacterized protein LOC101303763 [Fragaria vesca subsp. vesca]	8.68801	3.11903	4.04867e-182	7.53335e-180	yes	up
FxaC_6g07810	FxaC_6g07810	PREDICTED: long chain acyl-CoA synthetase 2 [Fragaria vesca subsp. vesca]	6.65749	2.73498	5.00637e-181	9.26733e-179	yes	up
FxaC_21g00720	FxaC_21g00720	PREDICTED: tubulin alpha-2 chain-like [Fragaria vesca subsp. vesca]	4.50285	2.17084	4.45624e-180	8.14404e-178	yes	up
FxaC_19g05100	FxaC_19g05100	cellulase [Fragaria x ananassa]	3.03916	1.60367	3.99524e-179	7.28299e-177	yes	up
FxaC_1g12540	FxaC_1g12540	PREDICTED: GDSL esterase/lipase EXL3-like [Fragaria vesca subsp. vesca]	353.175	8.46424	1.29757e-178	2.35938e-176	yes	up
FxaC_6g42350	FxaC_6g42350	transcription factor MYB28-like [Fragaria vesca]	23.1872	4.53526	2.98204e-177	5.40855e-175	yes	up
FxaC_22g47360	FxaC_22g47360	PREDICTED: probable leucine-rich repeat receptor-like protein kinase At1g68400 [Fragaria vesca subsp. vesca]	4.44591	2.15248	7.69376e-177	1.39191e-174	yes	up
FxaC_14g21850	FxaC_14g21850	CASP-like protein 1E1 [Rosa chinensis]	7.91835	2.9852	1.2473e-176	2.24523e-174	yes	up
FxaC_22g16710	FxaC_22g16710	Chlorophyll a-b binding protein 40, chloroplastic [Trichinella nelsoni]	0.499394	-1.00175	1.32959e-176	2.38737e-174	yes	down
FxaC_23g34830	FxaC_23g34830	PREDICTED: uncharacterized protein LOC101311974 isoform X4 [Fragaria vesca subsp. vesca]	19.4177	4.2793	2.40908e-176	4.3149e-174	yes	up
FxaC_22g68450	FxaC_22g68450	PREDICTED: anthocyanidin 3-O-glucoside 2''-O-glucosyltransferase-like [Fragaria vesca subsp. vesca]	33.2212	5.05403	3.61931e-176	6.45037e-174	yes	up
FxaC_28g11220	FxaC_28g11220	PREDICTED: mannose-1-phosphate guanylyltransferase 1 [Fragaria vesca subsp. vesca]	2.25363	1.17225	4.16271e-176	7.40045e-174	yes	up
FxaC_26g04640	FxaC_26g04640	PREDICTED: wall-associated receptor kinase 1-like isoform X2 [Fragaria vesca subsp. vesca]	2.88973	1.53093	1.07656e-175	1.90448e-173	yes	up
FxaC_26g08260	FxaC_26g08260	LOW QUALITY PROTEIN: uncharacterized protein LOC112167556 [Rosa chinensis]	2923.14	11.5133	8.15081e-175	1.43837e-172	yes	up
FxaC_5g15340	FxaC_5g15340	PREDICTED: probable methyltransferase PMT3 [Fragaria vesca subsp. vesca]	2.00079	1.00057	2.6418e-174	4.65053e-172	yes	up
FxaC_1g28490	FxaC_1g28490	PREDICTED: probable cinnamyl alcohol dehydrogenase 9 [Fragaria vesca subsp. vesca]	2.2352	1.1604	2.2753e-173	3.97613e-171	yes	up
FxaC_12g05850	FxaC_12g05850	PREDICTED: trans-cinnamate 4-monooxygenase [Fragaria vesca subsp. vesca]	2.09174	1.06471	1.11489e-171	1.93418e-169	yes	up
FxaC_25g39390	FxaC_25g39390	PREDICTED: chalcone--flavonone isomerase 1 [Fragaria vesca subsp. vesca]	3.24163	1.69672	1.15844e-171	2.00488e-169	yes	up
FxaC_20g11040	FxaC_20g11040	PREDICTED: uncharacterized protein LOC101303763 [Fragaria vesca subsp. vesca]	10.0377	3.32736	1.88065e-171	3.23918e-169	yes	up
FxaC_17g15380	FxaC_17g15380	PREDICTED: methionine gamma-lyase [Fragaria vesca subsp. vesca]	2.15063	1.10476	7.56715e-170	1.2879e-167	yes	up
FxaC_20g40280	FxaC_20g40280	protein DOWNSTREAM OF FLC-like [Rosa chinensis]	3.511	1.81188	1.28882e-169	2.18834e-167	yes	up
FxaC_19g21910	FxaC_19g21910	PREDICTED: ABC transporter B family member 2-like [Fragaria vesca subsp. vesca]	3.10373	1.634	1.97275e-169	3.34171e-167	yes	up
FxaC_25g53760	FxaC_25g53760	PREDICTED: glutamate synthase 1 [NADH]	2.42047	1.27529	9.35329e-169	1.58066e-166	yes	up
FxaC_8g37310	FxaC_8g37310	PREDICTED: UDP-glycosyltransferase 74E1-like [Fragaria vesca subsp. vesca]	6.72713	2.74999	1.48227e-168	2.49908e-166	yes	up
FxaC_14g37860	FxaC_14g37860	PREDICTED: alternative oxidase 3, mitochondrial-like [Fragaria vesca subsp. vesca]	3.53225	1.82059	2.63466e-168	4.43159e-166	yes	up
FxaC_22g58580	FxaC_22g58580	PREDICTED: non-specific lipid-transfer protein 1-like isoform X1 [Fragaria vesca subsp. vesca]	3.42177	1.77474	1.20123e-166	2.00642e-164	yes	up
FxaC_8g34470	FxaC_8g34470	Recname: Full=Cinnamate beta-D-glucosyltransferase; Altname: Full=UDP-glucose:cinnamate glucosyltransferase; Short=FaGT2 >gi|51705411|gb|AAU09443.1| UDP-glucose glucosyltransferase [Fragaria x ananassa]	8.08379	3.01503	1.2581e-165	2.09167e-163	yes	up
FxaC_22g69040	FxaC_22g69040	PREDICTED: bifunctional 3-dehydroquinate dehydratase/shikimate dehydrogenase, chloroplastic-like [Fragaria vesca subsp. vesca]	3.86207	1.94937	1.78139e-165	2.95485e-163	yes	up
FxaC_1g21290	FxaC_1g21290	PREDICTED: tubulin alpha-3 chain [Fragaria vesca subsp. vesca]	2.19389	1.13349	2.18449e-165	3.61512e-163	yes	up
FxaC_4g38890	FxaC_4g38890	PREDICTED: reticulon-like protein B21 [Fragaria vesca subsp. vesca]	4.95063	2.30761	8.69919e-164	1.42649e-161	yes	up
FxaC_24g46880	FxaC_24g46880	PREDICTED: trifunctional UDP-glucose 4,6-dehydratase/UDP-4-keto-6-deoxy-D-glucose 3,5-epimerase/UDP-4-keto-L-rhamnose-reductase RHM1-like [Fragaria vesca subsp. vesca]	2.8571	1.51455	2.30495e-163	3.76246e-161	yes	up
FxaC_19g36370	FxaC_19g36370	PREDICTED: protein ASPARTIC PROTEASE IN GUARD CELL 2 [Fragaria vesca subsp. vesca]	4.97695	2.31526	2.94183e-163	4.79118e-161	yes	up
FxaC_16g19440	FxaC_16g19440	PREDICTED: very-long-chain 3-oxoacyl-CoA reductase 1-like [Fragaria vesca subsp. vesca]	3.8418	1.94178	1.09815e-162	1.78042e-160	yes	up
FxaC_9g05310	FxaC_9g05310	PREDICTED: trans-cinnamate 4-monooxygenase [Fragaria vesca subsp. vesca]	2.06079	1.0432	3.53941e-162	5.72547e-160	yes	up
FxaC_13g22740	FxaC_13g22740	PREDICTED: pyruvate dehydrogenase E1 component subunit beta-1, mitochondrial [Fragaria vesca subsp. vesca]	0.464723	-1.10556	6.86149e-162	1.10744e-159	yes	down
FxaC_16g19200	FxaC_16g19200	PREDICTED: very-long-chain 3-oxoacyl-CoA reductase 1-like [Fragaria vesca subsp. vesca]	2624.61	11.3579	2.29401e-161	3.68596e-159	yes	up
FxaC_23g56670	FxaC_23g56670	hypothetical protein RchiOBHm_Chr2g0159041 [Rosa chinensis]	6.52101	2.7051	3.17221e-161	5.08566e-159	yes	up
FxaC_21g23380	FxaC_21g23380	PREDICTED: pectinesterase-like [Fragaria vesca subsp. vesca]	15.632	3.96643	1.32407e-160	2.11801e-158	yes	up
FxaC_22g53250	FxaC_22g53250	PREDICTED: short-chain dehydrogenase TIC 32, chloroplastic [Fragaria vesca subsp. vesca]	447.709	8.80642	2.79951e-160	4.44843e-158	yes	up
FxaC_1g05800	FxaC_1g05800	PREDICTED: reticulon-like protein B21 [Fragaria vesca subsp. vesca]	4.56343	2.19012	9.41901e-160	1.48356e-157	yes	up
FxaC_4g27170	FxaC_4g27170	PREDICTED: beta-galactosidase 3 [Fragaria vesca subsp. vesca]	4.75001	2.24793	1.40802e-158	2.21287e-156	yes	up
FxaC_13g20100	FxaC_13g20100		3.1097	1.63677	2.04356e-158	3.19075e-156	yes	up
FxaC_15g15330	FxaC_15g15330	PREDICTED: non-specific lipid transfer protein GPI-anchored 1 [Fragaria vesca subsp. vesca]	10.9196	3.44884	2.08488e-158	3.24821e-156	yes	up
FxaC_9g27400	FxaC_9g27400	PREDICTED: fatty acyl-CoA reductase 1-like [Fragaria vesca subsp. vesca]	3.49705	1.80614	5.77417e-158	8.97658e-156	yes	up
FxaC_25g28890	FxaC_25g28890	PREDICTED: fasciclin-like arabinogalactan protein 10 [Fragaria vesca subsp. vesca]	4.18438	2.06501	1.85281e-156	2.86798e-154	yes	up
FxaC_16g21810	FxaC_16g21810	PREDICTED: alpha-xylosidase 1 [Fragaria vesca subsp. vesca]	4.21929	2.077	3.51026e-156	5.42187e-154	yes	up
FxaC_17g02940	FxaC_17g02940	None	4.44776	2.15308	6.36764e-156	9.81422e-154	yes	up
FxaC_1g11480	FxaC_1g11480	PREDICTED: LOW QUALITY PROTEIN: phosphoserine aminotransferase 1, chloroplastic [Fragaria vesca subsp. vesca]	5.74009	2.52107	2.10121e-154	3.22469e-152	yes	up
FxaC_13g05880	FxaC_13g05880	PREDICTED: auxin efflux carrier component 3-like [Fragaria vesca subsp. vesca]	2.35638	1.23657	2.6564e-153	4.05937e-151	yes	up
FxaC_25g45990	FxaC_25g45990	PREDICTED: probable WRKY transcription factor 70 [Fragaria vesca subsp. vesca]	0.41404	-1.27216	7.46542e-153	1.13841e-150	yes	down
FxaC_25g49930	FxaC_25g49930	PREDICTED: cytochrome P450 704C1-like isoform X2 [Fragaria vesca subsp. vesca]	45.3667	5.50356	1.53647e-152	2.33801e-150	yes	up
FxaC_22g05790	FxaC_22g05790	PREDICTED: tubulin alpha-2 chain-like [Fragaria vesca subsp. vesca]	2.6939	1.4297	2.44662e-152	3.71509e-150	yes	up
FxaC_18g31790	FxaC_18g31790	uncharacterized protein LOC101314754 [Fragaria vesca]	2.15487	1.1076	1.16013e-151	1.75419e-149	yes	up
FxaC_17g44770	FxaC_17g44770	PREDICTED: beta-xylosidase/alpha-L-arabinofuranosidase 2-like isoform X1 [Fragaria vesca subsp. vesca]	11.7237	3.55136	1.95955e-151	2.95673e-149	yes	up
FxaC_13g51990	FxaC_13g51990	PREDICTED: kaempferol 3-O-beta-D-galactosyltransferase-like [Fragaria vesca subsp. vesca]	5.15554	2.36612	5.58034e-151	8.38487e-149	yes	up
FxaC_5g40810	FxaC_5g40810	PREDICTED: UDP-glycosyltransferase 74E1-like isoform X1 [Fragaria vesca subsp. vesca]	3.59537	1.84614	1.05406e-149	1.56741e-147	yes	up
FxaC_23g31160	FxaC_23g31160	PREDICTED: glycerol-3-phosphate 2-O-acyltransferase 6 [Fragaria vesca subsp. vesca]	3.10731	1.63566	1.70198e-149	2.52565e-147	yes	up
FxaC_6g09870	FxaC_6g09870	PREDICTED: isoflavone reductase homolog [Fragaria vesca subsp. vesca]	6.16679	2.62452	8.06583e-149	1.192e-146	yes	up
FxaC_6g00740	FxaC_6g00740	PREDICTED: protein NUCLEAR FUSION DEFECTIVE 4-like [Fragaria vesca subsp. vesca]	2.86123	1.51663	1.80318e-148	2.65934e-146	yes	up
FxaC_28g08170	FxaC_28g08170	PREDICTED: probable WRKY transcription factor 70 [Fragaria vesca subsp. vesca]	0.370769	-1.43141	3.14095e-148	4.62279e-146	yes	down
FxaC_20g05490	FxaC_20g05490	endo-beta-1,4-glucanase [Fragaria x ananassa]	4.04982	2.01786	4.8572e-148	7.13413e-146	yes	up
FxaC_18g41780	FxaC_18g41780	endo-beta-1,4-glucanase [Fragaria x ananassa]	3.24338	1.6975	1.46577e-147	2.14411e-145	yes	up
FxaC_28g08320	FxaC_28g08320	PREDICTED: probable chalcone--flavonone isomerase 3 [Fragaria vesca subsp. vesca]	2.53014	1.33922	1.68988e-147	2.46692e-145	yes	up
FxaC_22g12840	FxaC_22g12840	PREDICTED: glucan endo-1,3-beta-glucosidase 12 [Fragaria vesca subsp. vesca]	6.81459	2.76863	1.86774e-147	2.71551e-145	yes	up
FxaC_11g19710	FxaC_11g19710	PREDICTED: CBS domain-containing protein CBSX5-like [Fragaria vesca subsp. vesca]	27.5536	4.78417	4.92518e-147	7.14628e-145	yes	up
FxaC_7g25840	FxaC_7g25840	PREDICTED: UDP-glucuronic acid decarboxylase 2 [Fragaria vesca subsp. vesca]	2.49115	1.31681	2.23246e-146	3.2327e-144	yes	up
FxaC_23g28410	FxaC_23g28410	PREDICTED: short-chain dehydrogenase TIC 32, chloroplastic [Fragaria vesca subsp. vesca]	124.491	6.9599	2.29465e-145	3.30941e-143	yes	up
FxaC_13g04240	FxaC_13g04240	PREDICTED: probable polygalacturonase non-catalytic subunit JP650 [Fragaria vesca subsp. vesca]	6.74764	2.75438	3.94808e-145	5.67127e-143	yes	up
FxaC_5g34350	FxaC_5g34350	PREDICTED: plastid division protein PDV2-like [Fragaria vesca subsp. vesca]	9.54434	3.25465	4.34445e-145	6.21577e-143	yes	up
FxaC_22g04240	FxaC_22g04240	Recname: Full=2-methylene-furan-3-one reductase; Altname: Full=Enone oxidoreductase; Short=FaEO; Altname: Full=Quinone oxidoreductase; Short=FaQR >gi|29468088|gb|AAO22131.1| quinone oxidoreductase [Fragaria x ananassa]	4.17096	2.06038	4.55306e-145	6.50128e-143	yes	up
FxaC_17g54310	FxaC_17g54310	protein DOWNSTREAM OF FLC-like [Rosa chinensis]	3.11241	1.63803	1.07397e-144	1.53048e-142	yes	up
FxaC_11g39320	FxaC_11g39320	PREDICTED: neutral ceramidase [Fragaria vesca subsp. vesca]	2.15755	1.1094	1.48904e-144	2.11778e-142	yes	up
FxaC_21g13280	FxaC_21g13280	PREDICTED: xyloglucan endotransglucosylase/hydrolase protein 9 [Fragaria vesca subsp. vesca]	7.72505	2.94954	2.53706e-144	3.60117e-142	yes	up
FxaC_17g36390	FxaC_17g36390	PREDICTED: uncharacterized protein LOC101307015 [Fragaria vesca subsp. vesca]	2.48493	1.3132	8.79271e-144	1.2456e-141	yes	up
FxaC_12g43430	FxaC_12g43430	PREDICTED: shikimate O-hydroxycinnamoyltransferase-like [Fragaria vesca subsp. vesca]	3.35171	1.7449	1.32407e-143	1.86835e-141	yes	up
FxaC_19g39450	FxaC_19g39450	protein DOWNSTREAM OF FLC-like [Rosa chinensis]	4.07566	2.02703	6.45836e-143	9.09527e-141	yes	up
FxaC_23g60800	FxaC_23g60800	PREDICTED: 36.4 kDa proline-rich protein [Fragaria vesca subsp. vesca]	4.56027	2.18912	2.09393e-142	2.94309e-140	yes	up
FxaC_27g16900	FxaC_27g16900	PREDICTED: protein ECERIFERUM 1-like [Fragaria vesca subsp. vesca]	20.7744	4.37673	4.70679e-142	6.58978e-140	yes	up
FxaC_20g16020	FxaC_20g16020	PREDICTED: protein IQ-DOMAIN 31 [Fragaria vesca subsp. vesca]	5.81375	2.53947	7.55241e-142	1.05532e-139	yes	up
FxaC_18g35500	FxaC_18g35500	PREDICTED: uncharacterized protein LOC101303763 [Fragaria vesca subsp. vesca]	8.07839	3.01407	1.22862e-141	1.70683e-139	yes	up
FxaC_17g22680	FxaC_17g22680	PREDICTED: uncharacterized protein LOC101292421 [Fragaria vesca subsp. vesca]	2.4662	1.30229	4.40764e-141	6.11139e-139	yes	up
FxaC_24g08720	FxaC_24g08720	Dehydroquinase class I [Corchorus capsularis]	4.34769	2.12025	8.66181e-141	1.19868e-138	yes	up
FxaC_22g33250	FxaC_22g33250	uncharacterized protein LOC106771576 isoform X2 [Vigna radiata var. radiata]	133.322	7.05877	9.80743e-141	1.35461e-138	yes	up
FxaC_26g11550	FxaC_26g11550	PREDICTED: probable chalcone--flavonone isomerase 3 [Fragaria vesca subsp. vesca]	2.4526	1.29431	1.55301e-140	2.14091e-138	yes	up
FxaC_4g29410	FxaC_4g29410	PREDICTED: LOW QUALITY PROTEIN: phosphoserine aminotransferase 1, chloroplastic [Fragaria vesca subsp. vesca]	5.09483	2.34903	1.58259e-140	2.17752e-138	yes	up
FxaC_5g32200	FxaC_5g32200	PREDICTED: beta-galactosidase 3-like [Fragaria vesca subsp. vesca]	5.58748	2.4822	2.08969e-139	2.85882e-137	yes	up
FxaC_15g34490	FxaC_15g34490	PREDICTED: probable pectate lyase 8 [Fragaria vesca subsp. vesca]	2.14596	1.10162	2.66842e-139	3.64361e-137	yes	up
FxaC_24g47220	FxaC_24g47220	Chlorophyll a-b binding protein 40, chloroplastic [Trichinella nelsoni]	0.486156	-1.04051	9.26802e-139	1.25596e-136	yes	down
FxaC_5g43350	FxaC_5g43350	PREDICTED: uncharacterized protein LOC101304340 [Fragaria vesca subsp. vesca]	10.2228	3.35372	2.42621e-138	3.27552e-136	yes	up
FxaC_19g02350	FxaC_19g02350	PREDICTED: uncharacterized protein LOC101313699 isoform X1 [Fragaria vesca subsp. vesca]	2.1468	1.10219	4.59533e-138	6.18072e-136	yes	up
FxaC_16g18830	FxaC_16g18830	PREDICTED: probable pectate lyase 5 [Fragaria vesca subsp. vesca]	12.0026	3.58527	1.93484e-137	2.59264e-135	yes	up
FxaC_3g20890	FxaC_3g20890	PREDICTED: tubulin alpha-3 chain [Fragaria vesca subsp. vesca]	2.32714	1.21856	1.20818e-136	1.61293e-134	yes	up
FxaC_14g22560	FxaC_14g22560	PREDICTED: peptide methionine sulfoxide reductase B3, chloroplastic-like [Fragaria vesca subsp. vesca]	6.31076	2.65781	1.4449e-136	1.92536e-134	yes	up
FxaC_13g22050	FxaC_13g22050	PREDICTED: non-specific lipid transfer protein GPI-anchored 1 [Fragaria vesca subsp. vesca]	4.15668	2.05543	1.49766e-135	1.98829e-133	yes	up
FxaC_18g30330	FxaC_18g30330	PREDICTED: protein IQ-DOMAIN 31 [Fragaria vesca subsp. vesca]	5.58946	2.48271	6.52708e-135	8.60173e-133	yes	up
FxaC_24g51060	FxaC_24g51060	PREDICTED: glucan endo-1,3-beta-glucosidase 12 [Fragaria vesca subsp. vesca]	7.15538	2.83903	6.67192e-135	8.77651e-133	yes	up
FxaC_28g18570	FxaC_28g18570	PREDICTED: transcription factor bHLH57-like [Fragaria vesca subsp. vesca]	18.8739	4.23832	1.33914e-134	1.75834e-132	yes	up
FxaC_28g14820	FxaC_28g14820	PREDICTED: 3-ketoacyl-CoA synthase 21-like [Fragaria vesca subsp. vesca]	0.364823	-1.45473	1.6871e-134	2.21118e-132	yes	down
FxaC_16g28810	FxaC_16g28810	PREDICTED: polygalacturonase At1g48100 [Fragaria vesca subsp. vesca]	12.8097	3.67917	2.16931e-134	2.838e-132	yes	up
FxaC_17g02320	FxaC_17g02320	PREDICTED: myosin-3 [Fragaria vesca subsp. vesca]	6.21955	2.63681	4.50272e-134	5.87998e-132	yes	up
FxaC_18g04350	FxaC_18g04350	PREDICTED: 7-deoxyloganetin glucosyltransferase-like [Fragaria vesca subsp. vesca]	21.3926	4.41904	6.03483e-134	7.86642e-132	yes	up
FxaC_25g45870	FxaC_25g45870	PREDICTED: probably inactive leucine-rich repeat receptor-like protein kinase At3g28040 [Fragaria vesca subsp. vesca]	6.26705	2.64779	5.65703e-133	7.36059e-131	yes	up
FxaC_4g37830	FxaC_4g37830	PREDICTED: protein SRG1-like [Fragaria vesca subsp. vesca]	15.7317	3.9756	1.60015e-132	2.07825e-130	yes	up
FxaC_13g14750	FxaC_13g14750	PREDICTED: probably inactive leucine-rich repeat receptor-like protein kinase At3g28040 [Fragaria vesca subsp. vesca]	5.66437	2.50192	1.99971e-131	2.58319e-129	yes	up
FxaC_18g06150	FxaC_18g06150	PREDICTED: protein ASPARTIC PROTEASE IN GUARD CELL 2 [Fragaria vesca subsp. vesca]	18.8727	4.23823	2.58074e-131	3.32777e-129	yes	up
FxaC_4g08950	FxaC_4g08950	PREDICTED: uncharacterized protein LOC105352244 [Fragaria vesca subsp. vesca]	12.3256	3.62358	2.77747e-131	3.57502e-129	yes	up
FxaC_1g10200	FxaC_1g10200	PREDICTED: sucrose synthase [Fragaria vesca subsp. vesca]	3.52485	1.81756	3.27781e-131	4.21148e-129	yes	up
FxaC_18g21450	FxaC_18g21450	PREDICTED: ABC transporter B family member 2-like [Fragaria vesca subsp. vesca]	2.64546	1.40352	1.65001e-130	2.11245e-128	yes	up
FxaC_21g55040	FxaC_21g55040	PREDICTED: glycerol-3-phosphate 2-O-acyltransferase 6 [Fragaria vesca subsp. vesca]	5.15018	2.36462	2.13835e-130	2.73278e-128	yes	up
FxaC_3g04310	FxaC_3g04310	PREDICTED: ABC transporter G family member 32 isoform X1 [Fragaria vesca subsp. vesca]	3.85427	1.94646	2.81252e-130	3.58163e-128	yes	up
FxaC_18g45220	FxaC_18g45220	anthocyanidin synthase [Fragaria x ananassa]	2.65255	1.40738	7.62057e-130	9.6873e-128	yes	up
FxaC_10g30280	FxaC_10g30280	PREDICTED: non-specific lipid transfer protein GPI-anchored 2 [Fragaria vesca subsp. vesca]	9.49617	3.24735	9.52401e-130	1.20856e-127	yes	up
FxaC_8g23340	FxaC_8g23340	PREDICTED: aquaporin PIP2-7 [Fragaria vesca subsp. vesca]	3.95538	1.98382	1.18124e-129	1.49366e-127	yes	up
FxaC_10g02530	FxaC_10g02530	PREDICTED: polyphenol oxidase, chloroplastic-like [Fragaria vesca subsp. vesca]	3.39113	1.76177	7.94893e-129	1.00337e-126	yes	up
FxaC_10g49020	FxaC_10g49020		3.20189	1.67892	2.58905e-128	3.25093e-126	yes	up
FxaC_2g07540	FxaC_2g07540	PREDICTED: ABC transporter G family member 32 isoform X1 [Fragaria vesca subsp. vesca]	9.49531	3.24722	2.63637e-128	3.30458e-126	yes	up
FxaC_22g20420	FxaC_22g20420	PREDICTED: pectinesterase-like [Fragaria vesca subsp. vesca]	3.78196	1.91913	1.46571e-127	1.83081e-125	yes	up
FxaC_16g03280	FxaC_16g03280	PREDICTED: kaempferol 3-O-beta-D-galactosyltransferase-like [Fragaria vesca subsp. vesca]	23.0516	4.5268	1.48677e-127	1.85389e-125	yes	up
FxaC_11g26590	FxaC_11g26590	PREDICTED: non-specific lipid transfer protein GPI-anchored 2 [Fragaria vesca subsp. vesca]	7.33234	2.87427	5.41846e-127	6.73304e-125	yes	up
FxaC_14g26790	FxaC_14g26790	PREDICTED: xyloglucan endotransglucosylase/hydrolase 2-like [Fragaria vesca subsp. vesca]	13.3599	3.73984	7.40973e-127	9.19152e-125	yes	up
FxaC_1g19510	FxaC_1g19510	PREDICTED: subtilisin-like protease [Fragaria vesca subsp. vesca]	3.68557	1.88189	4.77016e-126	5.90702e-124	yes	up
FxaC_28g02740	FxaC_28g02740	PREDICTED: protein IQ-DOMAIN 1 isoform X1 [Fragaria vesca subsp. vesca]	4.25677	2.08976	6.96813e-126	8.61398e-124	yes	up
FxaC_24g27960	FxaC_24g27960	PREDICTED: glycine-rich protein DC7.1-like [Fragaria vesca subsp. vesca]	2.19847	1.1365	6.89875e-125	8.4699e-123	yes	up
FxaC_25g46430	FxaC_25g46430	PREDICTED: probable non-specific lipid-transfer protein AKCS9 [Fragaria vesca subsp. vesca]	0.46039	-1.11907	1.3321e-124	1.62991e-122	yes	down
FxaC_21g59280	FxaC_21g59280	PREDICTED: probable inactive receptor kinase At5g58300 [Fragaria vesca subsp. vesca]	4.93595	2.30333	2.56186e-124	3.12926e-122	yes	up
FxaC_11g47020	FxaC_11g47020	PREDICTED: probable polyamine transporter At3g13620 [Fragaria vesca subsp. vesca]	16.1602	4.01437	5.2337e-124	6.38201e-122	yes	up
FxaC_13g51390	FxaC_13g51390	PREDICTED: splicing factor U2af large subunit A [Fragaria vesca subsp. vesca]	2.42429	1.27756	2.83729e-123	3.4481e-121	yes	up
FxaC_22g17560	FxaC_22g17560	hypothetical protein RchiOBHm_Chr2g0159041 [Rosa chinensis]	6.37882	2.67329	2.86084e-123	3.47084e-121	yes	up
FxaC_9g10780	FxaC_9g10780	PREDICTED: neutral ceramidase [Fragaria vesca subsp. vesca]	2.16119	1.11183	1.60309e-122	1.92862e-120	yes	up
FxaC_27g00510	FxaC_27g00510	PREDICTED: DNA-damage-repair/toleration protein DRT100 [Fragaria vesca subsp. vesca]	6.22041	2.63701	1.92957e-122	2.31365e-120	yes	up
FxaC_25g36400	FxaC_25g36400	PREDICTED: uncharacterized protein LOC101306672 [Fragaria vesca subsp. vesca]	0.460096	-1.11999	2.88405e-122	3.45235e-120	yes	down
FxaC_28g06090	FxaC_28g06090	PREDICTED: cytochrome P450 704C1-like isoform X2 [Fragaria vesca subsp. vesca]	12.1655	3.60472	5.94547e-121	7.06989e-119	yes	up
FxaC_9g23830	FxaC_9g23830	PREDICTED: non-specific lipid transfer protein GPI-anchored 2 [Fragaria vesca subsp. vesca]	6.11237	2.61173	1.52305e-120	1.80512e-118	yes	up
FxaC_16g29070	FxaC_16g29070	PREDICTED: probable polygalacturonase non-catalytic subunit JP650 [Fragaria vesca subsp. vesca]	5.49259	2.45749	1.57146e-120	1.85942e-118	yes	up
FxaC_12g28910	FxaC_12g28910	PREDICTED: CBS domain-containing protein CBSX5-like [Fragaria vesca subsp. vesca]	8.32885	3.05812	2.11219e-120	2.49513e-118	yes	up
FxaC_22g18000	FxaC_22g18000	PREDICTED: GDSL esterase/lipase APG [Fragaria vesca subsp. vesca]	2.43736	1.28532	6.78986e-120	7.96843e-118	yes	up
FxaC_8g15780	FxaC_8g15780	PREDICTED: 14 kDa proline-rich protein DC2.15-like [Fragaria vesca subsp. vesca]	2.47719	1.3087	1.01664e-119	1.19117e-117	yes	up
FxaC_11g17180	FxaC_11g17180	PREDICTED: epidermis-specific secreted glycoprotein EP1-like [Fragaria vesca subsp. vesca]	7.23334	2.85466	1.20129e-119	1.40522e-117	yes	up
FxaC_2g23060	FxaC_2g23060	PREDICTED: subtilisin-like protease [Fragaria vesca subsp. vesca]	2.9235	1.5477	1.64819e-119	1.92484e-117	yes	up
FxaC_23g40470	FxaC_23g40470	PREDICTED: receptor-like protein 12 isoform X2 [Fragaria vesca subsp. vesca]	0.443317	-1.17359	3.7308e-119	4.34291e-117	yes	down
FxaC_28g35210	FxaC_28g35210	PREDICTED: protein ASPARTIC PROTEASE IN GUARD CELL 2 [Fragaria vesca subsp. vesca]	4.01645	2.00592	1.27532e-118	1.47737e-116	yes	up
FxaC_14g03510	FxaC_14g03510	PREDICTED: polygalacturonase At1g48100 [Fragaria vesca subsp. vesca]	8.04463	3.00803	2.47411e-118	2.86148e-116	yes	up
FxaC_26g14500	FxaC_26g14500	PREDICTED: mannose-1-phosphate guanylyltransferase 1 [Fragaria vesca subsp. vesca]	4.29164	2.10153	3.95158e-118	4.56293e-116	yes	up
FxaC_2g18860	FxaC_2g18860	PREDICTED: protein PHYLLO, chloroplastic-like [Fragaria vesca subsp. vesca]	2.82354	1.4975	5.40141e-118	6.22705e-116	yes	up
FxaC_28g02430	FxaC_28g02430	PREDICTED: glutamate synthase 1 [NADH]	2.2262	1.15458	6.86583e-118	7.90263e-116	yes	up
FxaC_21g56300	FxaC_21g56300	PREDICTED: glycerol-3-phosphate 2-O-acyltransferase 6 [Fragaria vesca subsp. vesca]	3.86396	1.95008	6.98662e-118	8.0288e-116	yes	up
FxaC_12g23260	FxaC_12g23260	PREDICTED: uncharacterized protein LOC101302722 [Fragaria vesca subsp. vesca]	138.937	7.11829	6.25119e-117	7.16076e-115	yes	up
FxaC_27g41450	FxaC_27g41450	PREDICTED: probable chalcone--flavonone isomerase 3 [Fragaria vesca subsp. vesca]	3.15571	1.65796	3.44779e-116	3.94316e-114	yes	up
FxaC_24g20740	FxaC_24g20740	PREDICTED: uncharacterized protein LOC101308990 [Fragaria vesca subsp. vesca]	140.991	7.13946	3.93876e-116	4.49037e-114	yes	up
FxaC_21g66100	FxaC_21g66100	PREDICTED: bifunctional 3-dehydroquinate dehydratase/shikimate dehydrogenase, chloroplastic-like [Fragaria vesca subsp. vesca]	4.52029	2.17642	5.32987e-116	6.06668e-114	yes	up
FxaC_20g34620	FxaC_20g34620	PREDICTED: beta-xylosidase/alpha-L-arabinofuranosidase 2-like isoform X1 [Fragaria vesca subsp. vesca]	16.3863	4.03442	4.00751e-115	4.53993e-113	yes	up
FxaC_23g44600	FxaC_23g44600	PREDICTED: uncharacterized protein LOC101296410 [Fragaria vesca subsp. vesca]	7.76576	2.95713	1.1647e-114	1.31116e-112	yes	up
FxaC_8g10250	FxaC_8g10250	PREDICTED: uncharacterized protein LOC101306980 [Fragaria vesca subsp. vesca]	3.79268	1.92322	3.17162e-114	3.56487e-112	yes	up
FxaC_23g29050	FxaC_23g29050	expansin A1 [Fragaria chiloensis subsp. chiloensis]	2.0794	1.05617	5.50225e-113	6.12695e-111	yes	up
FxaC_14g23310	FxaC_14g23310	PREDICTED: RNA-binding protein cabeza [Fragaria vesca subsp. vesca]	5.37312	2.42576	1.53471e-112	1.70104e-110	yes	up
FxaC_5g09880	FxaC_5g09880	PREDICTED: UDP-glucuronic acid decarboxylase 2 [Fragaria vesca subsp. vesca]	2.3613	1.23958	1.95501e-112	2.16356e-110	yes	up
FxaC_25g54360	FxaC_25g54360	PREDICTED: molybdate-anion transporter [Fragaria vesca subsp. vesca]	4.2353	2.08247	7.61699e-112	8.40361e-110	yes	up
FxaC_4g30940	FxaC_4g30940	PREDICTED: sucrose synthase [Fragaria vesca subsp. vesca]	2.4698	1.3044	1.14261e-111	1.25868e-109	yes	up
FxaC_17g29930	FxaC_17g29930	PREDICTED: ABC transporter B family member 2-like [Fragaria vesca subsp. vesca]	2.1168	1.08188	2.77112e-111	3.04794e-109	yes	up
FxaC_9g36350	FxaC_9g36350	PREDICTED: epidermis-specific secreted glycoprotein EP1-like [Fragaria vesca subsp. vesca]	25.8388	4.69147	3.72456e-111	4.09036e-109	yes	up
FxaC_21g54890	FxaC_21g54890	PREDICTED: uncharacterized protein LOC101308990 [Fragaria vesca subsp. vesca]	2.74276	1.45563	9.46063e-111	1.03423e-108	yes	up
FxaC_26g16570	FxaC_26g16570	PREDICTED: chalcone--flavonone isomerase 1 [Fragaria vesca subsp. vesca]	2.72173	1.44452	7.34869e-110	8.02135e-108	yes	up
FxaC_27g52970	FxaC_27g52970	PREDICTED: LOW QUALITY PROTEIN: 4-coumarate--CoA ligase 2-like [Fragaria vesca subsp. vesca]	2.49321	1.31801	7.68308e-110	8.37363e-108	yes	up
FxaC_5g43330	FxaC_5g43330	PREDICTED: bifunctional aspartokinase/homoserine dehydrogenase 1, chloroplastic-like isoform X2 [Fragaria vesca subsp. vesca]	2.12175	1.08526	1.41723e-109	1.5376e-107	yes	up
FxaC_2g00340	FxaC_2g00340	PREDICTED: sucrose synthase [Fragaria vesca subsp. vesca]	2.51975	1.33328	3.2721e-109	3.53934e-107	yes	up
FxaC_8g07380	FxaC_8g07380	PREDICTED: filament-like plant protein 4 [Fragaria vesca subsp. vesca]	3.0029	1.58636	9.07752e-109	9.77473e-107	yes	up
FxaC_2g14590	FxaC_2g14590	PREDICTED: pectinesterase [Fragaria vesca subsp. vesca]	0.232513	-2.10461	1.03507e-108	1.1129e-106	yes	down
FxaC_23g57820	FxaC_23g57820	hypothetical protein CUMW_162280 [Citrus unshiu]	3.40771	1.7688	2.07102e-108	2.22342e-106	yes	up
FxaC_22g51360	FxaC_22g51360	PREDICTED: uncharacterized protein LOC101308990 [Fragaria vesca subsp. vesca]	2.4113	1.26981	4.26989e-108	4.55686e-106	yes	up
FxaC_6g16400	FxaC_6g16400	PREDICTED: carbonic anhydrase 2-like [Fragaria vesca subsp. vesca]	3.74779	1.90604	4.44089e-108	4.73232e-106	yes	up
FxaC_13g05500	FxaC_13g05500	PREDICTED: MLP-like protein 43 [Fragaria vesca subsp. vesca]	2.43104	1.28157	9.00286e-108	9.56527e-106	yes	up
FxaC_28g01800	FxaC_28g01800	PREDICTED: molybdate-anion transporter [Fragaria vesca subsp. vesca]	3.18621	1.67184	3.08139e-107	3.26423e-105	yes	up
FxaC_17g20190	FxaC_17g20190	PREDICTED: protein IQ-DOMAIN 31 [Fragaria vesca subsp. vesca]	5.14476	2.3631	1.01719e-106	1.07438e-104	yes	up
FxaC_20g39630	FxaC_20g39630	PREDICTED: uncharacterized protein LOC101299013 [Fragaria vesca subsp. vesca]	50.2196	5.65018	2.63912e-106	2.7834e-104	yes	up
FxaC_6g36780	FxaC_6g36780	hypothetical protein CUMW_029550 [Citrus unshiu]	3.63283	1.86109	1.13459e-105	1.18963e-103	yes	up
FxaC_22g23700	FxaC_22g23700	PREDICTED: GDSL esterase/lipase APG [Fragaria vesca subsp. vesca]	2.31315	1.20986	1.35493e-105	1.41859e-103	yes	up
FxaC_23g55690	FxaC_23g55690	PREDICTED: xyloglucan endotransglucosylase/hydrolase protein 9 [Fragaria vesca subsp. vesca]	10.88	3.44361	1.89419e-105	1.97454e-103	yes	up
FxaC_13g48930	FxaC_13g48930	PREDICTED: probable pectate lyase 8 [Fragaria vesca subsp. vesca]	2.43612	1.28458	3.298e-105	3.41807e-103	yes	up
FxaC_23g50330	FxaC_23g50330	PREDICTED: tubulin alpha-2 chain-like [Fragaria vesca subsp. vesca]	2.14732	1.10254	3.60448e-105	3.73033e-103	yes	up
FxaC_7g37760	FxaC_7g37760	PREDICTED: bark storage protein A-like [Fragaria vesca subsp. vesca]	52.6615	5.71868	5.25058e-105	5.42607e-103	yes	up
FxaC_19g13070	FxaC_19g13070	TPA_exp: transcription factor MYB30 [Fragaria x ananassa]	7.38504	2.88461	1.34969e-104	1.3928e-102	yes	up
FxaC_24g08050	FxaC_24g08050	gamma-interferon-inducible lysosomal thiol reductase-like [Rosa chinensis]	0.493027	-1.02026	2.53398e-104	2.60742e-102	yes	down
FxaC_16g15820	FxaC_16g15820	PREDICTED: RNA-binding protein cabeza [Fragaria vesca subsp. vesca]	7.57667	2.92156	6.7671e-104	6.93343e-102	yes	up
FxaC_25g53510	FxaC_25g53510	PREDICTED: protein IQ-DOMAIN 1 isoform X1 [Fragaria vesca subsp. vesca]	7.30171	2.86823	8.78645e-104	8.98959e-102	yes	up
FxaC_8g07830	FxaC_8g07830	PREDICTED: thaumatin-like protein 1b [Fragaria vesca subsp. vesca]	5.65672	2.49997	8.99244e-104	9.18726e-102	yes	up
FxaC_27g25360	FxaC_27g25360	PREDICTED: BAG family molecular chaperone regulator 6 isoform X1 [Fragaria vesca subsp. vesca]	2.59861	1.37774	1.30728e-103	1.33371e-101	yes	up
FxaC_6g25320	FxaC_6g25320	PREDICTED: probable methyltransferase PMT3 [Fragaria vesca subsp. vesca]	2.35188	1.23381	1.45629e-103	1.48362e-101	yes	up
FxaC_26g02910	FxaC_26g02910	PREDICTED: LOW QUALITY PROTEIN: 4-coumarate--CoA ligase 2-like [Fragaria vesca subsp. vesca]	2.50153	1.32281	3.52411e-103	3.57503e-101	yes	up
FxaC_11g04170	FxaC_11g04170	PREDICTED: GDSL esterase/lipase At1g29670-like [Fragaria vesca subsp. vesca]	4.8145	2.26739	3.93131e-103	3.98249e-101	yes	up
FxaC_8g00680	FxaC_8g00680	hypothetical protein CUMW_029550 [Citrus unshiu]	2.96793	1.56946	5.36103e-103	5.42318e-101	yes	up
FxaC_10g47570	FxaC_10g47570	PREDICTED: probable galactinol--sucrose galactosyltransferase 1 [Fragaria vesca subsp. vesca]	20.4679	4.35529	6.12317e-103	6.18544e-101	yes	up
FxaC_21g09130	FxaC_21g09130	PREDICTED: cyclic nucleotide-gated ion channel 2 [Fragaria vesca subsp. vesca]	2.51768	1.33209	6.48822e-103	6.53582e-101	yes	up
FxaC_15g21810	FxaC_15g21810	heavy metal-associated isoprenylated plant protein 32 isoform X1 [Prunus avium]	6.5379	2.70883	8.32746e-103	8.3768e-101	yes	up
FxaC_6g01070	FxaC_6g01070	PREDICTED: cleavage and polyadenylation specificity factor subunit 6 [Fragaria vesca subsp. vesca]	31.452	4.97508	1.29314e-102	1.29536e-100	yes	up
FxaC_6g02680	FxaC_6g02680	PREDICTED: serine carboxypeptidase-like 7 [Fragaria vesca subsp. vesca]	7.72119	2.94882	2.71349e-102	2.70682e-100	yes	up
FxaC_17g06070	FxaC_17g06070	PREDICTED: probable inactive receptor kinase At4g23740 [Fragaria vesca subsp. vesca]	4.35673	2.12324	7.39265e-102	7.36425e-100	yes	up
FxaC_9g21950	FxaC_9g21950	PREDICTED: zinc finger CCCH domain-containing protein 46-like [Fragaria vesca subsp. vesca]	6.7242	2.74936	1.64629e-101	1.63317e-99	yes	up
FxaC_10g31660	FxaC_10g31660	PREDICTED: zinc finger CCCH domain-containing protein 46-like [Fragaria vesca subsp. vesca]	13.1696	3.71914	3.16704e-101	3.12883e-99	yes	up
FxaC_21g22890	FxaC_21g22890	PREDICTED: histone acetyltransferase HAC1-like isoform X1 [Fragaria vesca subsp. vesca]	0.489393	-1.03094	1.41224e-100	1.38378e-98	yes	down
FxaC_1g19410	FxaC_1g19410	PREDICTED: classical arabinogalactan protein 4 [Fragaria vesca subsp. vesca]	7.13567	2.83505	3.06816e-100	3.00224e-98	yes	up
FxaC_7g30390	FxaC_7g30390	PREDICTED: ethylene-responsive transcription factor SHINE 2-like [Fragaria vesca subsp. vesca]	7.12972	2.83384	1.01046e-99	9.84722e-98	yes	up
FxaC_24g22020	FxaC_24g22020	PREDICTED: aquaporin TIP1-1-like [Fragaria vesca subsp. vesca]	2.53047	1.33941	1.11661e-99	1.0867e-97	yes	up
FxaC_18g09440	FxaC_18g09440	PREDICTED: GDSL esterase/lipase At1g33811 isoform X1 [Fragaria vesca subsp. vesca]	2.85029	1.51111	5.79183e-99	5.61386e-97	yes	up
FxaC_27g29440	FxaC_27g29440	transcriptional activator Myb [Fragaria vesca]	5.32389	2.41248	6.38739e-99	6.18277e-97	yes	up
FxaC_27g37240	FxaC_27g37240	Recname: Full=Chalcone--flavonone isomerase 2; Short=Chalcone isomerase 2 >gi|71979900|dbj|BAE17120.1| chalcone isomerase [Fragaria x ananassa]	2.75095	1.45993	2.3414e-98	2.2603e-96	yes	up
FxaC_25g31700	FxaC_25g31700	PREDICTED: cytochrome P450 86A8-like [Fragaria vesca subsp. vesca]	3.84979	1.94478	2.96945e-98	2.85891e-96	yes	up
FxaC_17g22920	FxaC_17g22920	PREDICTED: LOW QUALITY PROTEIN: NF-X1-type zinc finger protein NFXL1 [Fragaria vesca subsp. vesca]	2.46537	1.30181	4.27001e-98	4.10007e-96	yes	up
FxaC_15g01290	FxaC_15g01290	PREDICTED: protein indeterminate-domain 4, chloroplastic-like [Fragaria vesca subsp. vesca]	2.4472	1.29113	9.66256e-98	9.24093e-96	yes	up
FxaC_18g23320	FxaC_18g23320	PREDICTED: mannose-6-phosphate isomerase 2-like [Fragaria vesca subsp. vesca]	2.56905	1.36123	1.08332e-97	1.03467e-95	yes	up
FxaC_8g02650	FxaC_8g02650	AUX1 [Fragaria x ananassa]	4.59847	2.20116	1.54014e-97	1.46903e-95	yes	up
FxaC_14g01610	FxaC_14g01610	PREDICTED: protein indeterminate-domain 4, chloroplastic-like [Fragaria vesca subsp. vesca]	2.7693	1.46952	1.9873e-97	1.89302e-95	yes	up
FxaC_20g02260	FxaC_20g02260	PREDICTED: myosin-3 [Fragaria vesca subsp. vesca]	5.35513	2.42092	1.9964e-97	1.89917e-95	yes	up
FxaC_17g22810	FxaC_17g22810	PREDICTED: probable inactive receptor kinase At1g48480 [Fragaria vesca subsp. vesca]	3.41536	1.77204	3.55721e-97	3.37949e-95	yes	up
FxaC_24g13770	FxaC_24g13770	PREDICTED: non-specific lipid-transfer protein 3-like [Fragaria vesca subsp. vesca]	112.735	6.8168	3.579e-97	3.3957e-95	yes	up
FxaC_22g67790	FxaC_22g67790	protein ECERIFERUM 2-like [Rosa chinensis]	34.0972	5.09158	4.04117e-97	3.82914e-95	yes	up
FxaC_20g04360	FxaC_20g04360	cellulase [Fragaria x ananassa]	4.07638	2.02729	5.86554e-97	5.55047e-95	yes	up
FxaC_8g38450	FxaC_8g38450	PREDICTED: cleavage and polyadenylation specificity factor subunit 6 [Fragaria vesca subsp. vesca]	153.796	7.26488	1.08361e-96	1.02136e-94	yes	up
FxaC_23g59800	FxaC_23g59800	PREDICTED: putative laccase-9 [Fragaria vesca subsp. vesca]	16.9577	4.08387	1.47794e-96	1.39122e-94	yes	up
FxaC_6g43520	FxaC_6g43520	PREDICTED: tubulin beta chain-like [Fragaria vesca subsp. vesca]	2.96847	1.56972	1.78839e-96	1.68125e-94	yes	up
FxaC_22g56290	FxaC_22g56290	PREDICTED: vacuolar cation/proton exchanger 3 [Fragaria vesca subsp. vesca]	4.55334	2.18692	3.34748e-96	3.14282e-94	yes	up
FxaC_25g43750	FxaC_25g43750	PREDICTED: cytochrome P450 90A1 [Fragaria vesca subsp. vesca]	2.39855	1.26216	4.46565e-96	4.17626e-94	yes	up
FxaC_6g24260	FxaC_6g24260	PREDICTED: glutathione transferase GST 23-like [Fragaria vesca subsp. vesca]	2.38553	1.25431	5.31269e-96	4.96194e-94	yes	up
FxaC_18g32810	FxaC_18g32810	PREDICTED: uncharacterized protein At1g04910-like [Fragaria vesca subsp. vesca]	3.36863	1.75216	2.61504e-95	2.4329e-93	yes	up
FxaC_24g56550	FxaC_24g56550	PREDICTED: cyclic nucleotide-gated ion channel 2 [Fragaria vesca subsp. vesca]	2.97458	1.57269	2.91593e-95	2.70932e-93	yes	up
FxaC_16g12540	FxaC_16g12540	PREDICTED: probably inactive leucine-rich repeat receptor-like protein kinase At3g28040 [Fragaria vesca subsp. vesca]	2.99757	1.58379	2.94034e-95	2.72847e-93	yes	up
FxaC_17g11510	FxaC_17g11510	PREDICTED: GDSL esterase/lipase At3g48460 [Fragaria vesca subsp. vesca]	4.92002	2.29866	6.37241e-95	5.90562e-93	yes	up
FxaC_16g29990	FxaC_16g29990	PREDICTED: microtubule-associated protein TORTIFOLIA1 [Fragaria vesca subsp. vesca]	5.75232	2.52414	1.27709e-94	1.1805e-92	yes	up
FxaC_15g13460	FxaC_15g13460	PREDICTED: uncharacterized protein LOC101307854 [Fragaria vesca subsp. vesca]	2.82276	1.4971	3.26107e-94	3.00282e-92	yes	up
FxaC_12g23020	FxaC_12g23020	PREDICTED: ankyrin repeat-containing protein At5g02620-like isoform X1 [Fragaria vesca subsp. vesca]	0.468962	-1.09246	5.33627e-94	4.90111e-92	yes	down
FxaC_17g47750	FxaC_17g47750	PREDICTED: GDSL esterase/lipase At1g33811 isoform X1 [Fragaria vesca subsp. vesca]	3.53886	1.82328	4.67442e-93	4.27138e-91	yes	up
FxaC_13g27990	FxaC_13g27990	PREDICTED: uncharacterized protein LOC101312339 [Fragaria vesca subsp. vesca]	5.32981	2.41408	5.82244e-93	5.31366e-91	yes	up
FxaC_8g16330	FxaC_8g16330	PREDICTED: UDP-glucuronic acid decarboxylase 2 [Fragaria vesca subsp. vesca]	2.19424	1.13372	5.98975e-93	5.45941e-91	yes	up
FxaC_6g31400	FxaC_6g31400	AUX1 [Fragaria x ananassa]	2.8156	1.49344	1.43164e-92	1.29993e-90	yes	up
FxaC_18g37740	FxaC_18g37740	PREDICTED: neurofilament medium polypeptide-like [Fragaria vesca subsp. vesca]	16.006	4.00054	1.5751e-92	1.42839e-90	yes	up
FxaC_11g07430	FxaC_11g07430	PREDICTED: LOW QUALITY PROTEIN: tyrosine decarboxylase 1-like [Fragaria vesca subsp. vesca]	3.56396	1.83348	2.49809e-92	2.25686e-90	yes	up
FxaC_16g30850	FxaC_16g30850	PREDICTED: protein indeterminate-domain 4, chloroplastic-like [Fragaria vesca subsp. vesca]	4.01649	2.00594	5.47236e-92	4.91916e-90	yes	up
FxaC_20g38030	FxaC_20g38030	PREDICTED: protein TRANSPARENT TESTA 12-like [Fragaria vesca subsp. vesca]	2.57291	1.3634	2.39676e-91	2.14642e-89	yes	up
FxaC_5g09600	FxaC_5g09600	PREDICTED: endoglucanase 17 [Fragaria vesca subsp. vesca]	9.87026	3.30309	2.7364e-91	2.44449e-89	yes	up
FxaC_3g01510	FxaC_3g01510	PREDICTED: reticulon-like protein B21 [Fragaria vesca subsp. vesca]	7.48456	2.90392	2.89074e-91	2.57915e-89	yes	up
FxaC_10g46070	FxaC_10g46070	PREDICTED: trans-cinnamate 4-monooxygenase [Fragaria vesca subsp. vesca]	2.06662	1.04728	5.10217e-91	4.54093e-89	yes	up
FxaC_13g52030	FxaC_13g52030	PREDICTED: myb-related protein Myb4-like [Fragaria vesca subsp. vesca]	0.36409	-1.45763	8.13857e-91	7.22542e-89	yes	down
FxaC_14g02030	FxaC_14g02030	PREDICTED: glutathione S-transferase U17-like [Fragaria vesca subsp. vesca]	2.58291	1.369	1.59079e-90	1.41056e-88	yes	up
FxaC_1g22720	FxaC_1g22720	PREDICTED: very-long-chain (3R)-3-hydroxyacyl-CoA dehydratase PASTICCINO 2A [Fragaria vesca subsp. vesca]	2.47307	1.3063	1.99714e-90	1.76651e-88	yes	up
FxaC_3g17800	FxaC_3g17800	PREDICTED: protein RALF-like 34 [Fragaria vesca subsp. vesca]	6.94549	2.79608	2.00101e-90	1.76775e-88	yes	up
FxaC_17g02930	FxaC_17g02930	PREDICTED: cytochrome P450 86A7 [Fragaria vesca subsp. vesca]	4.27542	2.09607	2.43498e-90	2.14849e-88	yes	up
FxaC_21g01850	FxaC_21g01850	PREDICTED: uncharacterized protein LOC101296410 [Fragaria vesca subsp. vesca]	6.40997	2.68032	3.51138e-90	3.09445e-88	yes	up
FxaC_17g20400	FxaC_17g20400	PREDICTED: mitochondrial outer membrane protein porin of 36 kDa-like [Fragaria vesca subsp. vesca]	12.2897	3.61938	4.53002e-90	3.98725e-88	yes	up
FxaC_2g29870	FxaC_2g29870	PREDICTED: uncharacterized protein LOC103321333 [Prunus mume]	2.41457	1.27176	6.23886e-90	5.46456e-88	yes	up
FxaC_21g51670	FxaC_21g51670	PREDICTED: short-chain dehydrogenase TIC 32, chloroplastic [Fragaria vesca subsp. vesca]	20.2352	4.33879	8.57168e-90	7.48958e-88	yes	up
FxaC_13g48290	FxaC_13g48290	PREDICTED: phospholipase A2-alpha isoform X1 [Fragaria vesca subsp. vesca]	12.6771	3.66415	1.35748e-89	1.1818e-87	yes	up
FxaC_21g48260	FxaC_21g48260	PREDICTED: RING finger and CHY zinc finger domain-containing protein 1 [Fragaria vesca subsp. vesca]	5.47168	2.45198	3.60415e-89	3.1188e-87	yes	up
FxaC_20g24780	FxaC_20g24780	PREDICTED: ABC transporter B family member 2-like [Fragaria vesca subsp. vesca]	2.13881	1.09681	4.18211e-89	3.61458e-87	yes	up
FxaC_15g08350	FxaC_15g08350	PREDICTED: uncharacterized protein LOC105351130 [Fragaria vesca subsp. vesca]	5.14001	2.36177	1.13693e-88	9.80288e-87	yes	up
FxaC_7g22250	FxaC_7g22250	PREDICTED: protein LONGIFOLIA 1 [Fragaria vesca subsp. vesca]	2.31002	1.2079	1.34722e-88	1.15882e-86	yes	up
FxaC_14g09950	FxaC_14g09950	PREDICTED: alpha-xylosidase 1 [Fragaria vesca subsp. vesca]	4.32674	2.11328	1.85811e-88	1.59635e-86	yes	up
FxaC_18g30740	FxaC_18g30740	TPA_exp: transcription factor MYB30 [Fragaria x ananassa]	4.08129	2.02903	6.09862e-88	5.21453e-86	yes	up
FxaC_3g12480	FxaC_3g12480	PREDICTED: protein Mid1-COMPLEMENTING ACTIVITY 1 [Fragaria vesca subsp. vesca]	3.23797	1.69509	3.51634e-87	2.99234e-85	yes	up
FxaC_4g11930	FxaC_4g11930	PREDICTED: ABC transporter G family member 11-like [Fragaria vesca subsp. vesca]	3.4983	1.80665	3.83993e-87	3.26385e-85	yes	up
FxaC_21g17460	FxaC_21g17460	PREDICTED: putative laccase-9 [Fragaria vesca subsp. vesca]	64.9237	6.02067	6.35846e-87	5.39815e-85	yes	up
FxaC_25g52860	FxaC_25g52860	PREDICTED: ABC transporter C family member 10-like [Fragaria vesca subsp. vesca]	2.61813	1.38853	8.76814e-87	7.42635e-85	yes	up
FxaC_23g41020	FxaC_23g41020	protein ECERIFERUM 2-like [Rosa chinensis]	12.576	3.65261	9.92364e-87	8.38524e-85	yes	up
FxaC_26g11690	FxaC_26g11690	PREDICTED: probably inactive leucine-rich repeat receptor-like protein kinase At3g28040 [Fragaria vesca subsp. vesca]	5.00155	2.32237	3.18823e-86	2.68136e-84	yes	up
FxaC_26g19530	FxaC_26g19530	PREDICTED: transcription factor bHLH57-like [Fragaria vesca subsp. vesca]	6.12152	2.61389	3.288e-86	2.76204e-84	yes	up
FxaC_21g17100	FxaC_21g17100	PREDICTED: subtilisin-like protease SBT5.3 [Fragaria vesca subsp. vesca]	2.70669	1.43653	3.76796e-86	3.16152e-84	yes	up
FxaC_14g27700	FxaC_14g27700	PREDICTED: probably inactive leucine-rich repeat receptor-like protein kinase At3g28040 [Fragaria vesca subsp. vesca]	3.46881	1.79444	3.81329e-86	3.19582e-84	yes	up
FxaC_7g07720	FxaC_7g07720	PREDICTED: beta-galactosidase 3-like [Fragaria vesca subsp. vesca]	8.46297	3.08116	4.53691e-86	3.79783e-84	yes	up
FxaC_24g51700	FxaC_24g51700	hypothetical protein RchiOBHm_Chr2g0159041 [Rosa chinensis]	6.38056	2.67368	2.52603e-85	2.10473e-83	yes	up
FxaC_21g44020	FxaC_21g44020	PREDICTED: aspartic proteinase nepenthesin-2 [Fragaria vesca subsp. vesca]	2.94754	1.55951	3.57219e-85	2.97295e-83	yes	up
FxaC_22g09180	FxaC_22g09180	PREDICTED: uncharacterized protein LOC101290690 [Fragaria vesca subsp. vesca]	35.4752	5.14874	3.8888e-85	3.22896e-83	yes	up
FxaC_4g17960	FxaC_4g17960	PREDICTED: very-long-chain (3R)-3-hydroxyacyl-CoA dehydratase PASTICCINO 2A [Fragaria vesca subsp. vesca]	2.84446	1.50816	6.04928e-85	5.01706e-83	yes	up
FxaC_14g35530	FxaC_14g35530	PREDICTED: subtilisin-like protease isoform X1 [Fragaria vesca subsp. vesca]	2.57069	1.36215	8.77894e-85	7.27255e-83	yes	up
FxaC_6g43210	FxaC_6g43210	PREDICTED: filament-like plant protein 4 [Fragaria vesca subsp. vesca]	2.70718	1.43679	1.46519e-84	1.2082e-82	yes	up
FxaC_10g05140	FxaC_10g05140	PREDICTED: putative methyltransferase DDB_G0268948 [Fragaria vesca subsp. vesca]	2.07708	1.05455	1.8922e-84	1.55853e-82	yes	up
FxaC_27g52520	FxaC_27g52520		5.65009	2.49827	4.03635e-84	3.3094e-82	yes	up
FxaC_22g71530	FxaC_22g71530	PREDICTED: cytochrome P450 714C2-like [Fragaria vesca subsp. vesca]	0.428184	-1.2237	5.15904e-84	4.22024e-82	yes	down
FxaC_5g40590	FxaC_5g40590	PREDICTED: serine carboxypeptidase-like 7 [Fragaria vesca subsp. vesca]	4.86598	2.28273	5.19968e-84	4.24865e-82	yes	up
FxaC_20g18560	FxaC_20g18560	PREDICTED: probable inactive receptor kinase At1g48480 [Fragaria vesca subsp. vesca]	2.72951	1.44864	7.90837e-84	6.45458e-82	yes	up
FxaC_25g01870	FxaC_25g01870	PREDICTED: uncharacterized protein LOC101292742 [Fragaria vesca subsp. vesca]	4.90106	2.29309	9.55079e-84	7.78623e-82	yes	up
FxaC_1g37350	FxaC_1g37350	PREDICTED: dihydrofolate reductase-like [Fragaria vesca subsp. vesca]	2.89142	1.53178	1.38066e-83	1.12176e-81	yes	up
FxaC_23g32850	FxaC_23g32850	PREDICTED: LOW QUALITY PROTEIN: patellin-6 [Fragaria vesca subsp. vesca]	5.5428	2.47061	3.40842e-83	2.7599e-81	yes	up
FxaC_24g57850	FxaC_24g57850	PREDICTED: tubulin alpha-2 chain-like [Fragaria vesca subsp. vesca]	2.27003	1.18271	4.51982e-83	3.6516e-81	yes	up
FxaC_26g08250	FxaC_26g08250	PREDICTED: cytochrome P450 704C1-like [Fragaria vesca subsp. vesca]	11.4457	3.51674	6.13728e-83	4.95279e-81	yes	up
FxaC_21g14990	FxaC_21g14990	PREDICTED: glucan endo-1,3-beta-glucosidase 12 [Fragaria vesca subsp. vesca]	3.63051	1.86017	7.62562e-83	6.14697e-81	yes	up
FxaC_5g37770	FxaC_5g37770	PREDICTED: D-3-phosphoglycerate dehydrogenase 1, chloroplastic [Fragaria vesca subsp. vesca]	2.31512	1.21109	1.03347e-82	8.32137e-81	yes	up
FxaC_15g00150	FxaC_15g00150	PREDICTED: uncharacterized protein LOC101307392 [Fragaria vesca subsp. vesca]	9.84006	3.29867	1.64469e-82	1.31985e-80	yes	up
FxaC_12g34930	FxaC_12g34930	probable LRR receptor-like serine/threonine-protein kinase At1g56140 isoform X2 [Rosa chinensis]	0.493544	-1.01875	2.03111e-82	1.62813e-80	yes	down
FxaC_18g44320	FxaC_18g44320	PREDICTED: myosin-3 [Fragaria vesca subsp. vesca]	6.57115	2.71615	5.62312e-82	4.48744e-80	yes	up
FxaC_27g32810	FxaC_27g32810	transcriptional activator Myb [Fragaria vesca]	4.93756	2.3038	6.55599e-82	5.22609e-80	yes	up
FxaC_16g05130	FxaC_16g05130	uncharacterized protein LOC112197486 [Rosa chinensis]	11.6612	3.54365	1.27394e-81	1.01327e-79	yes	up
FxaC_27g26560	FxaC_27g26560		3.06369	1.61527	2.50305e-81	1.98868e-79	yes	up
FxaC_13g01510	FxaC_13g01510	PREDICTED: protein indeterminate-domain 4, chloroplastic-like [Fragaria vesca subsp. vesca]	2.29903	1.20102	2.52021e-81	2.0001e-79	yes	up
FxaC_15g11900	FxaC_15g11900	PREDICTED: beta-glucosidase 12-like [Fragaria vesca subsp. vesca]	19.7382	4.30292	2.54143e-81	2.01471e-79	yes	up
FxaC_2g13450	FxaC_2g13450	PREDICTED: auxin-binding protein ABP19a-like [Fragaria vesca subsp. vesca]	3.95307	1.98297	4.02575e-81	3.18087e-79	yes	up
FxaC_5g09050	FxaC_5g09050	PREDICTED: flavonol synthase/flavanone 3-hydroxylase [Fragaria vesca subsp. vesca]	2.51427	1.33014	9.96199e-81	7.8368e-79	yes	up
FxaC_25g00960	FxaC_25g00960	PREDICTED: DNA-damage-repair/toleration protein DRT100 [Fragaria vesca subsp. vesca]	3.75514	1.90887	1.2533e-80	9.83778e-79	yes	up
FxaC_10g02040	FxaC_10g02040	PREDICTED: CSC1-like protein ERD4 [Fragaria vesca subsp. vesca]	2.24492	1.16667	1.29956e-80	1.01898e-78	yes	up
FxaC_28g08290	FxaC_28g08290	PREDICTED: probably inactive leucine-rich repeat receptor-like protein kinase At3g28040 [Fragaria vesca subsp. vesca]	5.90894	2.5629	2.08721e-80	1.63478e-78	yes	up
FxaC_21g16900	FxaC_21g16900	PREDICTED: ribulose-1,5 bisphosphate carboxylase/oxygenase large subunit N-methyltransferase, chloroplastic [Fragaria vesca subsp. vesca]	0.0325554	-4.94096	2.45056e-80	1.91519e-78	yes	down
FxaC_25g35590	FxaC_25g35590	PREDICTED: transcription factor bHLH57-like [Fragaria vesca subsp. vesca]	5.43819	2.44313	2.98706e-80	2.33195e-78	yes	up
FxaC_21g20760	FxaC_21g20760	PREDICTED: probable xyloglucan glycosyltransferase 5 [Fragaria vesca subsp. vesca]	3.14638	1.65369	6.45571e-80	5.01805e-78	yes	up
FxaC_21g65680	FxaC_21g65680	PREDICTED: uncharacterized protein LOC104435162 [Eucalyptus grandis]	19.4332	4.28045	4.19007e-79	3.24293e-77	yes	up
FxaC_5g22610	FxaC_5g22610	PREDICTED: aquaporin PIP2-7 [Fragaria vesca subsp. vesca]	2.10922	1.07671	5.01585e-79	3.87369e-77	yes	up
FxaC_15g13780	FxaC_15g13780	PREDICTED: very-long-chain 3-oxoacyl-CoA reductase 1-like [Fragaria vesca subsp. vesca]	2.54174	1.34582	6.19896e-79	4.78225e-77	yes	up
FxaC_1g21350	FxaC_1g21350	PREDICTED: leucine-rich repeat receptor-like serine/threonine-protein kinase BAM1 [Fragaria vesca subsp. vesca]	2.28753	1.19379	7.40485e-79	5.70031e-77	yes	up
FxaC_22g60180	FxaC_22g60180	PREDICTED: aspartic proteinase-like [Fragaria vesca subsp. vesca]	2.02939	1.02105	9.16954e-79	7.05122e-77	yes	up
FxaC_13g17530	FxaC_13g17530	PREDICTED: uncharacterized protein LOC101310993 [Fragaria vesca subsp. vesca]	5.96267	2.57596	1.97156e-78	1.51124e-76	yes	up
FxaC_13g34020	FxaC_13g34020	PREDICTED: RNA-binding protein cabeza [Fragaria vesca subsp. vesca]	6.51332	2.70339	4.29545e-78	3.28904e-76	yes	up
FxaC_3g14280	FxaC_3g14280	PREDICTED: probable mitochondrial chaperone bcs1 [Fragaria vesca subsp. vesca]	4.30532	2.10612	4.72375e-78	3.6093e-76	yes	up
FxaC_19g34300	FxaC_19g34300	PREDICTED: amino acid permease 6-like [Fragaria vesca subsp. vesca]	5.10626	2.35227	5.08511e-78	3.87304e-76	yes	up
FxaC_22g00560	FxaC_22g00560	PREDICTED: uncharacterized protein LOC101296410 [Fragaria vesca subsp. vesca]	5.77712	2.53035	5.73739e-78	4.3606e-76	yes	up
FxaC_15g17220	FxaC_15g17220	phytepsin-like isoform X2 [Prunus avium]	7.39671	2.88688	6.81106e-78	5.17115e-76	yes	up
FxaC_12g43420	FxaC_12g43420	None	3.80071	1.92627	7.75839e-78	5.88417e-76	yes	up
FxaC_21g58890	FxaC_21g58890	PREDICTED: non-specific lipid-transfer protein 3-like [Fragaria vesca subsp. vesca]	16.2909	4.026	1.06925e-77	8.08388e-76	yes	up
FxaC_11g24500	FxaC_11g24500	PREDICTED: fatty acyl-CoA reductase 3-like [Fragaria vesca subsp. vesca]	2.4411	1.28753	1.14551e-77	8.64222e-76	yes	up
FxaC_18g39750	FxaC_18g39750	PREDICTED: thaumatin-like protein 1b [Fragaria vesca subsp. vesca]	2.17421	1.12049	1.33488e-77	1.00498e-75	yes	up
FxaC_17g53500	FxaC_17g53500	PREDICTED: uncharacterized protein LOC101299013 [Fragaria vesca subsp. vesca]	7.26962	2.86188	1.50838e-77	1.13441e-75	yes	up
FxaC_15g02040	FxaC_15g02040	PREDICTED: microtubule-associated protein TORTIFOLIA1 [Fragaria vesca subsp. vesca]	14.8934	3.8966	1.86728e-77	1.4014e-75	yes	up
FxaC_15g06410	FxaC_15g06410	expansin [Fragaria x ananassa]	4.13811	2.04897	2.83406e-77	2.12253e-75	yes	up
FxaC_4g26890	FxaC_4g26890	PREDICTED: probable mitochondrial chaperone BCS1-B [Fragaria vesca subsp. vesca]	7.50778	2.90839	3.10596e-77	2.32374e-75	yes	up
FxaC_13g20420	FxaC_13g20420	PREDICTED: very-long-chain 3-oxoacyl-CoA reductase 1-like [Fragaria vesca subsp. vesca]	990.503	9.95202	3.86888e-77	2.88851e-75	yes	up
FxaC_28g00080	FxaC_28g00080	PREDICTED: RNA polymerase sigma factor sigA [Fragaria vesca subsp. vesca]	0.16043	-2.63998	7.72229e-77	5.74159e-75	yes	down
FxaC_24g21970	FxaC_24g21970	PREDICTED: RING finger and CHY zinc finger domain-containing protein 1 [Fragaria vesca subsp. vesca]	5.69607	2.50997	8.15533e-77	6.05729e-75	yes	up
FxaC_12g33860	FxaC_12g33860	hypothetical protein CUMW_167740 [Citrus unshiu]	2.49047	1.31642	1.64395e-76	1.216e-74	yes	up
FxaC_9g24010	FxaC_9g24010	PREDICTED: lysosomal beta glucosidase-like [Fragaria vesca subsp. vesca]	4.29456	2.10251	2.34709e-76	1.73075e-74	yes	up
FxaC_16g22400	FxaC_16g22400	leucoanthocyanidin reductase [Fragaria x ananassa]	2.05093	1.03628	2.83093e-76	2.08326e-74	yes	up
FxaC_5g01550	FxaC_5g01550	PREDICTED: tetratricopeptide repeat protein 7B [Fragaria vesca subsp. vesca]	5.02355	2.32871	3.44581e-76	2.53315e-74	yes	up
FxaC_5g35310	FxaC_5g35310	uncharacterized protein LOC112170876 [Rosa chinensis]	2.89382	1.53297	1.08015e-75	7.92437e-74	yes	up
FxaC_14g12580	FxaC_14g12580	PREDICTED: uncharacterized protein LOC101307854 [Fragaria vesca subsp. vesca]	3.4374	1.78132	1.21677e-75	8.91756e-74	yes	up
FxaC_7g43610	FxaC_7g43610	PREDICTED: probable WRKY transcription factor 40 isoform X1 [Fragaria vesca subsp. vesca]	0.413574	-1.27378	1.57842e-75	1.15445e-73	yes	down
FxaC_5g42090	FxaC_5g42090	PREDICTED: cleavage and polyadenylation specificity factor subunit 6 [Fragaria vesca subsp. vesca]	17.0882	4.09493	2.03709e-75	1.4884e-73	yes	up
FxaC_17g23040	FxaC_17g23040	purple acid phosphatase 3-like [Rosa chinensis]	6.43379	2.68567	2.0782e-75	1.5169e-73	yes	up
FxaC_15g30890	FxaC_15g30890	PREDICTED: serine carboxypeptidase-like 18 [Fragaria vesca subsp. vesca]	7.23305	2.8546	2.41099e-75	1.75801e-73	yes	up
FxaC_25g42010	FxaC_25g42010	hypothetical protein CUMW_140680 [Citrus unshiu]	2.5641	1.35845	2.43688e-75	1.77509e-73	yes	up
FxaC_21g67120	FxaC_21g67120	PREDICTED: trihelix transcription factor GTL2 [Fragaria vesca subsp. vesca]	4.75613	2.24979	2.87901e-75	2.09503e-73	yes	up
FxaC_22g67890	FxaC_22g67890	PREDICTED: trihelix transcription factor GTL2 [Fragaria vesca subsp. vesca]	5.12365	2.35717	3.5486e-75	2.57706e-73	yes	up
FxaC_19g13430	FxaC_19g13430	PREDICTED: protein IQ-DOMAIN 31 [Fragaria vesca subsp. vesca]	3.97239	1.99001	4.79095e-75	3.47226e-73	yes	up
FxaC_5g17410	FxaC_5g17410	PREDICTED: probable pectate lyase 20 [Fragaria vesca subsp. vesca]	17.0985	4.09579	4.91271e-75	3.55691e-73	yes	up
FxaC_22g10710	FxaC_22g10710	PREDICTED: lipoyl synthase 2, mitochondrial [Fragaria vesca subsp. vesca]	0.389675	-1.35966	1.14078e-74	8.23462e-73	yes	down
FxaC_24g34640	FxaC_24g34640	PREDICTED: basic leucine zipper 34 [Fragaria vesca subsp. vesca]	6.68731	2.74143	1.7662e-74	1.27235e-72	yes	up
FxaC_5g40530	FxaC_5g40530	PREDICTED: serine carboxypeptidase-like 18 [Fragaria vesca subsp. vesca]	19.9831	4.32071	2.04551e-74	1.47209e-72	yes	up
FxaC_5g45320	FxaC_5g45320	PREDICTED: isoflavone reductase homolog [Fragaria vesca subsp. vesca]	2.71767	1.44237	2.10209e-74	1.5113e-72	yes	up
FxaC_22g56120	FxaC_22g56120	PREDICTED: glycerol-3-phosphate 2-O-acyltransferase 6 [Fragaria vesca subsp. vesca]	2.84047	1.50613	2.17744e-74	1.56234e-72	yes	up
FxaC_13g01830	FxaC_13g01830	PREDICTED: protein SHOOT GRAVITROPISM 5-like isoform X1 [Fragaria vesca subsp. vesca]	2.30018	1.20175	2.55516e-74	1.83153e-72	yes	up
FxaC_20g14010	FxaC_20g14010	PREDICTED: uncharacterized protein At1g04910-like [Fragaria vesca subsp. vesca]	2.63374	1.39712	3.24994e-74	2.32259e-72	yes	up
FxaC_24g07690	FxaC_24g07690	protein ECERIFERUM 2-like [Rosa chinensis]	6.25327	2.64461	3.517e-74	2.50845e-72	yes	up
FxaC_19g02090	FxaC_19g02090	PREDICTED: myosin-3 [Fragaria vesca subsp. vesca]	5.23793	2.389	4.48916e-74	3.19866e-72	yes	up
FxaC_23g59240	FxaC_23g59240	PREDICTED: fasciclin-like arabinogalactan protein 2 [Fragaria vesca subsp. vesca]	2.77885	1.47449	5.10696e-74	3.63165e-72	yes	up
FxaC_21g45670	FxaC_21g45670	PREDICTED: cell division protein FtsZ homolog 2-1, chloroplastic [Fragaria vesca subsp. vesca]	2.77541	1.4727	1.39194e-73	9.84958e-72	yes	up
FxaC_27g47080	FxaC_27g47080	PREDICTED: uncharacterized protein LOC101302117 [Fragaria vesca subsp. vesca]	3.85092	1.9452	2.03319e-73	1.43448e-71	yes	up
FxaC_25g56500	FxaC_25g56500	PREDICTED: probable LRR receptor-like serine/threonine-protein kinase MEE39 [Fragaria vesca subsp. vesca]	2.60418	1.38083	5.86127e-73	4.10707e-71	yes	up
FxaC_23g50720	FxaC_23g50720	PREDICTED: gibberellin-regulated protein 6-like [Fragaria vesca subsp. vesca]	6.18227	2.62814	1.2345e-72	8.62507e-71	yes	up
FxaC_18g16750	FxaC_18g16750	PREDICTED: uncharacterized protein LOC101307015 [Fragaria vesca subsp. vesca]	6.33176	2.66261	1.9796e-72	1.37905e-70	yes	up
FxaC_22g63830	FxaC_22g63830	Dehydroquinase class I [Corchorus capsularis]	6.39719	2.67744	3.55106e-72	2.47139e-70	yes	up
FxaC_25g35200	FxaC_25g35200	PREDICTED: 3-ketoacyl-CoA synthase 1-like [Fragaria vesca subsp. vesca]	2.02336	1.01675	3.72149e-72	2.585e-70	yes	up
FxaC_10g37780	FxaC_10g37780	PREDICTED: interactor of constitutive active ROPs 3 [Fragaria vesca subsp. vesca]	5.21273	2.38204	4.76211e-72	3.30463e-70	yes	up
FxaC_19g10710	FxaC_19g10710	PREDICTED: glucan endo-1,3-beta-glucosidase 11 isoform X2 [Fragaria vesca subsp. vesca]	3.63382	1.86149	5.59718e-72	3.87663e-70	yes	up
FxaC_25g49890	FxaC_25g49890	LOW QUALITY PROTEIN: uncharacterized protein LOC112167556 [Rosa chinensis]	3.47834	1.7984	8.28657e-72	5.72826e-70	yes	up
FxaC_16g28220	FxaC_16g28220	PREDICTED: dynamin-related protein 1C [Fragaria vesca subsp. vesca]	3.81362	1.93116	1.13883e-71	7.86483e-70	yes	up
FxaC_26g03910	FxaC_26g03910	PREDICTED: protein IQ-DOMAIN 14-like [Fragaria vesca subsp. vesca]	25.6837	4.68278	1.55807e-71	1.07498e-69	yes	up
FxaC_4g21590	FxaC_4g21590	PREDICTED: subtilisin-like protease [Fragaria vesca subsp. vesca]	3.91198	1.9679	2.21598e-71	1.52596e-69	yes	up
FxaC_20g10770	FxaC_20g10770	PREDICTED: glucan endo-1,3-beta-glucosidase 11 isoform X2 [Fragaria vesca subsp. vesca]	2.67069	1.41721	3.22531e-71	2.21464e-69	yes	up
FxaC_17g09160	FxaC_17g09160	PREDICTED: uncharacterized protein LOC101294943 [Fragaria vesca subsp. vesca]	2.94138	1.55649	3.24173e-71	2.22379e-69	yes	up
FxaC_18g03320	FxaC_18g03320	PREDICTED: LOW QUALITY PROTEIN: probable leucine-rich repeat receptor-like protein kinase At1g35710 [Fragaria vesca subsp. vesca]	0.471106	-1.08588	3.78925e-71	2.5969e-69	yes	down
FxaC_5g27330	FxaC_5g27330	PREDICTED: laccase-14-like isoform X2 [Fragaria vesca subsp. vesca]	9.43949	3.23871	4.10516e-71	2.81072e-69	yes	up
FxaC_21g47420	FxaC_21g47420	PREDICTED: probable leucine-rich repeat receptor-like protein kinase At1g68400 [Fragaria vesca subsp. vesca]	4.67402	2.22466	8.48474e-71	5.8038e-69	yes	up
FxaC_2g14500	FxaC_2g14500	PREDICTED: suppressor of mec-8 and unc-52 protein homolog 2 [Fragaria vesca subsp. vesca]	22.344	4.48181	1.1873e-70	8.10604e-69	yes	up
FxaC_8g26580	FxaC_8g26580	PREDICTED: laccase-14-like [Fragaria vesca subsp. vesca]	11.9877	3.58348	1.88352e-70	1.28349e-68	yes	up
FxaC_3g18780	FxaC_3g18780	PREDICTED: classical arabinogalactan protein 4 [Fragaria vesca subsp. vesca]	3.19924	1.67773	6.03157e-70	4.08685e-68	yes	up
FxaC_18g27550	FxaC_18g27550	PREDICTED: probable inactive receptor kinase At1g48480 [Fragaria vesca subsp. vesca]	3.31164	1.72755	1.06845e-69	7.21234e-68	yes	up
FxaC_22g34830	FxaC_22g34830	PREDICTED: probable galactinol--sucrose galactosyltransferase 2 [Fragaria vesca subsp. vesca]	2.86953	1.52081	1.09614e-69	7.38534e-68	yes	up
FxaC_1g02100	FxaC_1g02100	PREDICTED: probable protein ABIL5 [Fragaria vesca subsp. vesca]	5.63875	2.49537	1.14784e-69	7.72646e-68	yes	up
FxaC_3g12820	FxaC_3g12820	LOW QUALITY PROTEIN: Nol1_Nop2_Fmu domain-containing protein/OPT domain-containing protein [Cephalotus follicularis]	2.25355	1.1722	1.19746e-69	8.05291e-68	yes	up
FxaC_23g31060	FxaC_23g31060	PREDICTED: laccase-4-like [Fragaria vesca subsp. vesca]	15.7702	3.97913	1.82633e-69	1.22477e-67	yes	up
FxaC_23g61290	FxaC_23g61290	PREDICTED: GDSL esterase/lipase At2g42990 [Fragaria vesca subsp. vesca]	16.5374	4.04766	5.87775e-69	3.9307e-67	yes	up
FxaC_15g02000	FxaC_15g02000	PREDICTED: transcription factor MYB1R1 [Fragaria vesca subsp. vesca]	2.11791	1.08264	6.18782e-69	4.13421e-67	yes	up
FxaC_19g02610	FxaC_19g02610	PREDICTED: transcription factor GLABRA 3 [Fragaria vesca subsp. vesca]	2.819	1.49518	7.02923e-69	4.68765e-67	yes	up
FxaC_16g25120	FxaC_16g25120	PREDICTED: probable protein S-acyltransferase 22 [Fragaria vesca subsp. vesca]	3.68769	1.88272	2.0945e-68	1.3929e-66	yes	up
FxaC_8g32240	FxaC_8g32240	uncharacterized protein LOC112170876 [Rosa chinensis]	7.86058	2.97464	2.12197e-68	1.40986e-66	yes	up
FxaC_24g40130	FxaC_24g40130	PREDICTED: auxin-responsive protein IAA27-like [Fragaria vesca subsp. vesca]	0.400726	-1.31931	3.0701e-68	2.03417e-66	yes	down
FxaC_18g40800	FxaC_18g40800	PREDICTED: dof zinc finger protein DOF5.6 [Fragaria vesca subsp. vesca]	8.86497	3.14812	3.20423e-68	2.12108e-66	yes	up
FxaC_9g48120	FxaC_9g48120	PREDICTED: GDSL esterase/lipase At1g29660-like [Fragaria vesca subsp. vesca]	4.23456	2.08221	3.37164e-68	2.22985e-66	yes	up
FxaC_20g07920	FxaC_20g07920	PREDICTED: GDSL esterase/lipase At3g48460 [Fragaria vesca subsp. vesca]	4.68617	2.22841	3.42743e-68	2.26466e-66	yes	up
FxaC_28g08980	FxaC_28g08980	PREDICTED: probable leucine-rich repeat receptor-like protein kinase IMK3 [Fragaria vesca subsp. vesca]	50.7284	5.66472	4.27519e-68	2.82221e-66	yes	up
FxaC_24g49370	FxaC_24g49370	PREDICTED: fasciclin-like arabinogalactan protein 2 [Fragaria vesca subsp. vesca]	3.33084	1.73588	8.59207e-68	5.66154e-66	yes	up
FxaC_28g00440	FxaC_28g00440	PREDICTED: LOW QUALITY PROTEIN: 4-coumarate--CoA ligase 2-like [Fragaria vesca subsp. vesca]	2.3991	1.26249	8.99968e-68	5.92469e-66	yes	up
FxaC_20g17970	FxaC_20g17970	PREDICTED: beta-glucosidase 44-like [Fragaria vesca subsp. vesca]	3.12203	1.64248	1.02491e-67	6.74107e-66	yes	up
FxaC_15g37220	FxaC_15g37220	PREDICTED: myb-related protein Myb4-like [Fragaria vesca subsp. vesca]	0.384344	-1.37953	1.67933e-67	1.1005e-65	yes	down
FxaC_5g05930	FxaC_5g05930	PREDICTED: ethylene-responsive transcription factor SHINE 2-like [Fragaria vesca subsp. vesca]	4.48477	2.16503	3.57764e-67	2.32962e-65	yes	up
FxaC_8g05290	FxaC_8g05290	PREDICTED: protein TRANSPARENT TESTA 12 [Fragaria vesca subsp. vesca]	3.9074	1.96621	4.18459e-67	2.71991e-65	yes	up
FxaC_17g19790	FxaC_17g19790	PREDICTED: myb-related protein 306-like isoform X1 [Fragaria vesca subsp. vesca]	3.62365	1.85744	5.83511e-67	3.78586e-65	yes	up
FxaC_7g03610	FxaC_7g03610	Recname: Full=Cinnamate beta-D-glucosyltransferase; Altname: Full=UDP-glucose:cinnamate glucosyltransferase; Short=FaGT2 >gi|51705411|gb|AAU09443.1| UDP-glucose glucosyltransferase [Fragaria x ananassa]	5.91983	2.56555	1.70125e-66	1.09882e-64	yes	up
FxaC_20g01370	FxaC_20g01370	anthocyanidin synthase [Fragaria x ananassa]	2.03834	1.02739	1.73097e-66	1.11701e-64	yes	up
FxaC_8g13850	FxaC_8g13850		2.22548	1.15411	1.96367e-66	1.2649e-64	yes	up
FxaC_19g12450	FxaC_19g12450	PREDICTED: uncharacterized protein LOC101314753 [Fragaria vesca subsp. vesca]	16.8294	4.07291	2.20138e-66	1.41676e-64	yes	up
FxaC_6g23780	FxaC_6g23780	PREDICTED: probable pectate lyase 20 [Fragaria vesca subsp. vesca]	20.8202	4.37991	5.90292e-66	3.77866e-64	yes	up
FxaC_16g25330	FxaC_16g25330	PREDICTED: uncharacterized protein LOC101300242 [Fragaria vesca subsp. vesca]	3.46306	1.79205	6.53933e-66	4.18232e-64	yes	up
FxaC_9g13220	FxaC_9g13220	PREDICTED: 125 kDa kinesin-related protein isoform X2 [Fragaria vesca subsp. vesca]	4.31197	2.10835	1.08538e-65	6.92937e-64	yes	up
FxaC_22g14690	FxaC_22g14690	PREDICTED: fasciclin-like arabinogalactan protein 2 [Fragaria vesca subsp. vesca]	2.4888	1.31545	1.12604e-65	7.18257e-64	yes	up
FxaC_5g37640	FxaC_5g37640	PREDICTED: cyclin-D3-1 [Fragaria vesca subsp. vesca]	5.78805	2.53308	1.21889e-65	7.7679e-64	yes	up
FxaC_28g04680	FxaC_28g04680	tubulin beta-1 chain [Rosa chinensis]	2.19932	1.13705	1.26393e-65	8.04783e-64	yes	up
FxaC_14g03250	FxaC_14g03250	PREDICTED: probable polygalacturonase non-catalytic subunit JP650 [Fragaria vesca subsp. vesca]	7.36144	2.87999	2.56546e-65	1.63061e-63	yes	up
FxaC_4g24850	FxaC_4g24850	hypothetical protein CUMW_141850 [Citrus unshiu]	5.11462	2.35463	2.67247e-65	1.69713e-63	yes	up
FxaC_21g11480	FxaC_21g11480	PREDICTED: allene oxide cyclase 4, chloroplastic-like [Fragaria vesca subsp. vesca]	5.78484	2.53228	3.83342e-65	2.43008e-63	yes	up
FxaC_17g16890	FxaC_17g16890	PREDICTED: uncharacterized protein LOC101314465 [Fragaria vesca subsp. vesca]	23.1592	4.53351	4.11812e-65	2.60825e-63	yes	up
FxaC_15g13790	FxaC_15g13790	PREDICTED: very-long-chain 3-oxoacyl-CoA reductase-like protein At1g24470 [Fragaria vesca subsp. vesca]	7.2468	2.85734	4.5707e-65	2.88726e-63	yes	up
[truncated: 4,452 more rows]

## Sheet: Table S5
Table S5. Gene ontology enrichment analysis of differentially expressed genes under salt stress in strawberry
[truncated: 574 more rows]

[truncated: 6 more sheets: Table S6, Table S7, Table S8, Table S9, Table S10, Table S11]
